# Supplementary material for: Developing an evidence assessment framework and appraising the academic literature on migrant health in Malaysia: a scoping review
Source: PubMed Central journal article supplement — BMJ Open. 2021 Jan 18;11(1):e041379. doi: 10.1136/bmjopen-2020-041379 (PMC7813391; doi:10.1136/bmjopen-2020-041379), 2021-01-18
Supplement: bmjopen-2020-041379.draft_revisions.pdf [file bmjopen-2020-041379.draft_revisions.pdf]

# BMJ Open

BMJ Open is committed to open peer review. As part of this commitment we make the peer review history of every article we publish publicly available.

When an article is published we post the peer reviewers' comments and the authors' responses online. We also post the versions of the paper that were used during peer review. These are the versions that the peer review comments apply to.

The versions of the paper that follow are the versions that were submitted during the peer review process. They are not the versions of record or the final published versions. They should not be cited or distributed as the published version of this manuscript.

BMJ Open is an open access journal and the full, final, typeset and author-corrected version of record of the manuscript is available on our site with no access controls, subscription charges or pay-per-view fees (<http://bmjopen.bmj.com>).

If you have any questions on BMJ Open's open peer review process please email [info.bmjopen@bmj.com](mailto:info.bmjopen@bmj.com)

# BMJ Open

## Developing an evidence framework and assessing the evidence on migrant health research in Malaysia: a scoping review

|                               |                                                                                                                                                                                                                                                                                                                                                                                                                                                                                                                                                                                                                                                                              |
|-------------------------------|------------------------------------------------------------------------------------------------------------------------------------------------------------------------------------------------------------------------------------------------------------------------------------------------------------------------------------------------------------------------------------------------------------------------------------------------------------------------------------------------------------------------------------------------------------------------------------------------------------------------------------------------------------------------------|
| Journal:                      | <i>BMJ Open</i>                                                                                                                                                                                                                                                                                                                                                                                                                                                                                                                                                                                                                                                              |
| Manuscript ID                 | bmjopen-2020-041379                                                                                                                                                                                                                                                                                                                                                                                                                                                                                                                                                                                                                                                          |
| Article Type:                 | Original research                                                                                                                                                                                                                                                                                                                                                                                                                                                                                                                                                                                                                                                            |
| Date Submitted by the Author: | 09-Jun-2020                                                                                                                                                                                                                                                                                                                                                                                                                                                                                                                                                                                                                                                                  |
| Complete List of Authors:     | de Smalen, Allard; United Nations University-Maastricht Economic and Social Research Institute on Innovation and Technology; Maastricht University<br>Chan, Zhie; United Nations University - International Institute for Global Health (UNU-IIGH)<br>Marques De Abreu Lopes, Claudia; United Nations University International Institute for Global Health<br>Vanore, Michaela; United Nations University-Maastricht Economic and Social Research Institute on Innovation and Technology; Maastricht University<br>Loganathan, Tharani; University of Malaya<br>Pocock, Nicola; London School of Hygiene and Tropical Medicine Faculty of Epidemiology and Population Health |
| Keywords:                     | STATISTICS & RESEARCH METHODS, PUBLIC HEALTH, HEALTH SERVICES ADMINISTRATION & MANAGEMENT                                                                                                                                                                                                                                                                                                                                                                                                                                                                                                                                                                                    |
|                               |                                                                                                                                                                                                                                                                                                                                                                                                                                                                                                                                                                                                                                                                              |

SCHOLARONE™  
Manuscripts

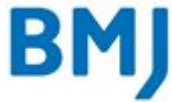

I, the Submitting Author has the right to grant and does grant on behalf of all authors of the Work (as defined in the below author licence), an exclusive licence and/or a non-exclusive licence for contributions from authors who are: i) UK Crown employees; ii) where BMJ has agreed a CC-BY licence shall apply, and/or iii) in accordance with the terms applicable for US Federal Government officers or employees acting as part of their official duties; on a worldwide, perpetual, irrevocable, royalty-free basis to BMJ Publishing Group Ltd ("BMJ") its licensees and where the relevant Journal is co-owned by BMJ to the co-owners of the Journal, to publish the Work in this journal and any other BMJ products and to exploit all rights, as set out in our [licence](#).

The Submitting Author accepts and understands that any supply made under these terms is made by BMJ to the Submitting Author unless you are acting as an employee on behalf of your employer or a postgraduate student of an affiliated institution which is paying any applicable article publishing charge ("APC") for Open Access articles. Where the Submitting Author wishes to make the Work available on an Open Access basis (and intends to pay the relevant APC), the terms of reuse of such Open Access shall be governed by a Creative Commons licence – details of these licences and which [Creative Commons](#) licence will apply to this Work are set out in our licence referred to above.

Other than as permitted in any relevant BMJ Author's Self Archiving Policies, I confirm this Work has not been accepted for publication elsewhere, is not being considered for publication elsewhere and does not duplicate material already published. I confirm all authors consent to publication of this Work and authorise the granting of this licence.

1 TITLE

2  
3  
4  
5 1 **Developing an evidence framework and assessing the**  
6  
7  
8  
9 2 **evidence on migrant health research in Malaysia: a**  
10  
11  
12 3 **scoping review**  
13  
14  
15  
16 4

17  
18 5 Allard W. de Smalen<sup>1,2,3</sup>, Zhie X. Chan<sup>3</sup>, Claudia A. Lopes<sup>3</sup>, Michaella Vanore<sup>1,2</sup>, Tharani  
19  
20 6 Loganathan<sup>4</sup>, Nicola S. Pocock<sup>3,5</sup>.  
21  
22  
23 7

24  
25 8 <sup>1</sup>Maastricht Graduate School of Governance, Maastricht University, Maastricht, The  
26  
27 9 Netherlands.  
28

29  
30 10 <sup>2</sup>United Nations University - Maastricht Economic and Social Research Institute on  
31  
32 11 Innovation and Technology (UNU-MERIT), Maastricht, The Netherlands.  
33

34 12 <sup>3</sup>United Nations University - International Institute for Global Health (UNU-IIGH), Kuala  
35  
36 13 Lumpur, Malaysia.  
37

38  
39 14 <sup>4</sup>Centre for Epidemiology and Evidence-based Practice, Department of Social and Preventive  
40  
41 15 Medicine, University of Malaya, Kuala Lumpur, Malaysia  
42

43 16 <sup>5</sup>Gender Violence & Health Centre, London School of Hygiene and Tropical Medicine,  
44  
45 17 London, United Kingdom.  
46  
47 18

48  
49  
50 19 Allard W. de Smalen (corresponding author)

51  
52  
53 20 E-mail: [allarddesmalen@gmail.com](mailto:allarddesmalen@gmail.com)  
54

55  
56 21 Word count: 6704  
57  
58  
59  
60

## ABSTRACT

## Abstract

**Background:** A large number of international migrants in Malaysia face challenges in procuring proper health, the extent of which is still relatively unknown. This study aims to explore the current status and composition of migrant health research in Malaysia, and to establish a framework to assess the quality of the academic literature.

**Methods:** A scoping review was conducted, whereby six databases – each database's inception date to 17 September 2019 – were searched. Studies were eligible for inclusion if they were conducted in Malaysia, peer-reviewed, fitted in the Bay Area Regional Health Inequities Initiative (BARHII) framework, and targeted the vulnerable international migrant population. Data was extracted by using the BARHII framework and a self-developed decision tree to identify the type of study design and corresponding level of evidence. The Joanna Briggs Institute (JBI) critical appraisal tools were modified and used to assess study quality, and a multiple-correspondence analysis (MCA) was conducted to identify associations between type of migrant, health dimension, research design, and study quality.

**Results:** 67 publications met the selection criteria and were included in the study. The majority (n=41) of studies included foreign workers. Over two-thirds (n=46) focused on disease and injury, and a similar number (n=46) had descriptive designs. The average quality of the papers was low, yet, differed significantly between research designs and health dimensions. The MCA showed that high quality studies were mostly qualitative designs that included refugees and focused on living conditions, while prevalence and analytical cross-sectional studies were mostly low quality.

## ABSTRACT

1  
2  
3  
43 **Conclusion:** This study makes methodological contributions to the field of migrant health  
4  
5  
6 44 research and shows research gaps in different health dimensions among migrants in Malaysia.  
7  
8 45 Researchers should address these gaps to improve the evidence base on migrant health in  
9  
10 46 Malaysia to support policymakers with high quality evidence for decision-making.

11  
12  
13  
14 47 **Key Words:** Malaysia, migrant, health, refugee, foreign worker, disease, research design,  
15  
16 48 evidence level, methodological research  
17  
18  
19  
20  
21

## 22 50 **Article summary**

### 23 24 25 51 **Strengths and limitations of this study**

- 26  
27  
28 52 • This study provides a comprehensive overview of the migrant health evidence base in  
29  
30 53 Malaysia, including a summary table, critical assessment tables, and a multiple-  
31  
32 54 correspondence analysis (MCA).  
33  
34  
35 55 • Methodological contributions by creating an evidence assessment framework,  
36  
37 56 including modified Joanna Briggs Institute (JBI) checklists and a decision tree that  
38  
39 57 identifies the type of study design and corresponding level of evidence.  
40  
41  
42 58 • Exclusive focus on vulnerable migrant populations within the non-citizen community  
43  
44 59 in Malaysia.  
45  
46  
47 60 • Only English peer-reviewed academic articles were included in this study, and,  
48  
49 61 therefore, much relevant information that could potentially be used to inform both  
50  
51 62 policies and practice could have been excluded from this review  
52  
53  
54  
55  
56  
57  
58  
59  
60

## 63 Introduction

64 Worldwide, the international migrant population accounts for 258 million people, with almost  
65 one-third within Asia.<sup>1</sup> Due to its strategic geographic location and high labour demand,  
66 Malaysia is among the top destination countries for international migrants in the Asian  
67 region.<sup>2</sup> According to the Department of Statistics Malaysia (DOSM), the documented non-  
68 citizen population represents 3.2 million people in 2019, 10% of Malaysia's total population.<sup>3</sup>  
69 DOSM defines a non-citizen as a person that resides in Malaysia for six months or more in  
70 the reference year.<sup>4</sup> However, no subcategories are included in this definition. According to  
71 the Office of the United Nations High Commissioner for Human Rights (OHCHR), a non-  
72 citizen is an individual that does not have an effective connection with the location where the  
73 person is situated according to the host nation, and includes various types of migrants, such  
74 as foreigners with permanent residency, refugees, asylum seekers, foreign labour,  
75 international students, stateless individuals, and victims of human trafficking.<sup>5</sup>  
76  
77• The vast majority of non-citizens in Malaysia are migrant workers, where foreign labour can  
78 be divided according to their visa status into regular migrant workers and irregular migrant  
79 workers. Regular migrant workers – also known as documented or legal migrant workers –  
80 can be defined as *“a migrant worker or members of his or her family authorised to enter, to*  
81 *stay and to engage in a remunerated activity in the State of employment pursuant to the law*  
82 *of that State and to international agreements to which that State is a party.”*<sup>6(p. 29)</sup> Irregular  
83 migrant workers – referred to as undocumented or illegal workers – can be defined as  
84 *“migrant workers or members of their families, who are not authorised to enter, to stay or to*  
85 *engage in employment in a state.”*<sup>6(p. 102)</sup> According to the Ministry of Home Affairs  
86 (MOHA), Malaysia issued 2 million work permits to documented migrant workers in 2019.<sup>7</sup>

## Materials and Methods

1  
2  
3 87 However, the total number of migrant workers, both documented and undocumented, is  
4  
5 88 estimated to fall between 4 and 6 million people.<sup>8</sup> Another group that contribute significantly  
6  
7  
8 89 to the non-citizen population in Malaysia are refugees and asylum seekers. Refugees and  
9  
10 90 asylum seekers are often used interchangeably, yet, these populations differ by their legal  
11  
12 91 status in destination countries. Refugees can be defined as *“people who, owing to a well-*  
13  
14 92 *founded fear of persecution for reasons of race, religion, nationality, membership of a*  
15  
16 93 *particular social group or political opinions, is outside the country of his nationality and is*  
17  
18 94 *unable or, owing to such fear, is unwilling avail himself of the protection of that country.”*<sup>6(p.</sup>  
19  
20  
21 95 <sup>79)</sup> Asylum seekers can be defined as *“people who seek safety from persecutions or serious*  
22  
23 96 *harm in a country other than his or her own and awaits a decision on the application for*  
24  
25 97 *refugee status under relevant international and national instruments. In case of a negative*  
26  
27 98 *decision, the person must leave the country and may be expelled, as may any non-national in*  
28  
29 99 *an irregular or unlawful situation, unless permission to stay is provided on humanitarian or*  
30  
31 100 *other related grounds.”*<sup>6(p. 12)</sup> In 2019, an approximate 178,580 refugees and asylum seekers  
32  
33 101 have registered with UNHCR in Malaysia, with a large majority from Myanmar (153,770),  
34  
35 102 and some other countries in the region, such as Pakistan, Yemen, Somalia, Syria,  
36  
37 103 Afghanistan, Iraq, Palestine, and Sri Lanka.<sup>9</sup>  
38  
39  
40  
41  
42  
43  
44

45 105 Foreign workers (documented and undocumented), refugees, and asylum seekers can be  
46  
47 106 classified as vulnerable migrants in Malaysia, as this population may face significant  
48  
49 107 hardships in their new country of residence.<sup>10 11</sup> Vulnerable migrants are more prone to being  
50  
51 108 exploited and abused, have an increased need to be protected by duty-bearers, and are not  
52  
53 109 able to fully benefit from their human rights.<sup>12</sup> Health is among these affected human rights,  
54  
55 110 as migrant workers and refugees could encounter various challenges to maintain proper  
56  
57 111 health and prevent poor health outcomes, including difficulties in accessing healthcare and  
58  
59  
60



## Materials and Methods

1  
2  
3 112 obtaining quality health services.<sup>12-14</sup> According to Sweileh et al,<sup>15</sup> assessing the current  
4  
5 113 status of scientific output and identifying research gaps could positively contribute towards  
6  
7  
8 114 improving the evidence base for advocating for migrant health needs. Despite the burgeoning  
9  
10 115 academic literature on migrant health in Malaysia, health information on migrant-related  
11  
12 116 issues is still limited, and public data remains difficult to access. Aggravating the matter,  
13  
14  
15 117 there is no overall picture of the evidence base on migrant health in Malaysia currently  
16  
17 118 available, including critical appraisal of the quality of the evidence base. Therefore, the aim  
18  
19 119 of this scoping review is to explore the current status and composition of migrant health  
20  
21 120 research in Malaysia, and to establish a framework to assess the quality of this academic  
22  
23  
24 121 literature.

25  
26  
27 12228  
29  
30 12331  
32  
33 12434  
35  
36 12537  
38  
39 12640  
41  
42 12743  
44  
45 12846  
47  
48 12949  
50  
51 13052  
53  
54 13155  
56  
57 13258  
59  
60 133

## 134 **Method**

### 135 **General methods**

136 A scoping review was conducted, following the Preferred Reporting Items for Systematic  
137 reviews and Meta-Analyses – Extension for Scoping Reviews (PRISMA-ScR) guidelines<sup>16</sup>  
138 (Supplementary file 1). A pre-review protocol was developed to guide decisions for literature  
139 selection and structure of the review, and included the review question, aim, search strategy,  
140 selection criteria, and risk of bias assessment. However, the protocol was not formally  
141 registered and changed to some extent over the course of this review. Data was extracted and  
142 organised using the Bay Area Regional Health Inequities Initiative (BARHII) framework. In  
143 addition, a decision tree was developed to classify the type of study design and level of  
144 evidence of each journal article. Subsequently, quality assessment of the included literature  
145 was conducted by using the Joanna Briggs Institute (JBI) critical appraisal toolkit. Lastly, the  
146 data was analysed and a multiple-correspondence analysis (MCA) was applied to explore  
147 existing relationships between variables.

### 148 **Patient and public involvement**

149 There were no patients involved in this study.

### 150 **Conceptual framework**

151 The Bay Area Regional Health Inequities Initiative (BARHII) framework was utilised to  
152 organise the identified literature in this scoping review into specific factors that shape  
153 equitable health outcomes (Figure 1). The BARHII framework was selected due to its  
154 comprehensive nature and inclusion of various health dimensions, whereas most other models  
155 focused on specific public health elements or lacked clear explanation regarding the included  
156 health-related components of the model. Although the framework was developed to address

## Materials and Methods

1  
2  
3 157 health inequities, its coherent structure lends itself to this project as it allows the researchers  
4  
5 158 to approach health from different perspectives.  
6  
7

8  
9 159

10  
11 160 [INSERT FIGURE 1]  
12  
13

14  
15 161

16  
17 162 The BARHII framework consists of six dimensions: 1) social inequities; 2) institutional  
18  
19 163 inequities; 3) living conditions; 4) risk behaviours; 5) disease and injury; and 6) mortality.  
20  
21 164 Except for 'social inequities,' the other five categories were used to describe which health  
22  
23 165 dimension the particular articles focused on. The social inequities element was incorporated  
24  
25 166 by describing the population of interest, which were divided into three categories; foreign  
26  
27 167 workers, asylum seekers and refugees, and unclassified migrants.  
28  
29

30  
31 168 Institutional inequities include the practices of corporations, businesses, government  
32  
33 169 agencies, schools, not-for-profit organisations as well as laws, regulations, and policies that  
34  
35 170 could influence health outcomes (e.g. a regulation that obligates companies to financially  
36  
37 171 compensate an individual in case of a work incident).  
38  
39

40  
41 172 Living conditions consist of the physical environment (e.g. indoor air pollution), economic  
42  
43 173 and work environment (e.g. unemployment), social environment (e.g. discrimination in the  
44  
45 174 neighbourhood), and service environment (e.g. healthcare) that people live in, and that play a  
46  
47 175 role in determining their health outcomes (e.g. denied healthcare access due to visa status).  
48  
49

50  
51 176 Risk behaviour includes smoking, poor nutrition, low physical activity, violence, alcohol and  
52  
53 177 other drugs, and sexual behaviour. This dimension reflects the way someone acts and how  
54  
55 178 that increases or decreases the risk of obtaining a particular health outcome (e.g. the attitude  
56  
57  
58  
59  
60

## Materials and Methods

179 and its related behaviour towards smoking could influence the individual's level of risk of  
180 developing lung cancer).

181 Disease and injury consist of communicable diseases (also known as infectious diseases; e.g.  
182 chlamydia), chronic diseases (also known as non-communicable diseases; e.g. cancer), and  
183 injuries (e.g. fractured bone). This dimension describes the number of people or individual  
184 cases with a particular health outcome (e.g. ten out of the 100 people suffered from cancer).

185 Mortality was changed to 'mortality and morbidity' and focused on death and disease rates of  
186 the study population (e.g. ten out of 1,000 live births of children under the age of one pass  
187 away) to distinguish epidemiological studies with larger samples from descriptive studies  
188 with smaller samples, where the latter were categorised as 'disease and injury' studies.

### 189 **Search strategy**

190 Six databases were carefully selected for this study as they cover a wide scope of disciplines,  
191 which may not be typically brought together in systematic literature searches. Econlit,  
192 Embase, Global Health, Medline, PsycInfo, and Social Policy and Practice were searched,  
193 and included all articles of each database's inception date to 17 September 2019. The search  
194 process included a two-stage procedure that was conducted by AS. The first stage focused on  
195 identifying English-language key words and Medical Subject Headings (MeSH) items for  
196 migrants (e.g. immigrants, foreign workers, refugees), health (e.g. disease, infection,  
197 disorder), and Malaysia (e.g. Sabah, Kuala Lumpur). Subsequently, these items were  
198 combined by using Boolean operators (e.g. migrant AND health AND Malaysia) in the  
199 search platform of each database (Supplementary file 2).

### 200 **Selection criteria**

201 Studies were eligible for inclusion if they have met the following inclusion criteria: 1)  
202 Conducted in Malaysia; 2) published in peer-reviewed academic journals; 3) primary

## Materials and Methods

203 outcomes of the study included a health-related variable from at least one of the six  
204 dimensions of the BARHII framework; 4) employment of one of the following study designs:  
205 literature synthesis (systematic review, meta-analysis, other scientific review designs),  
206 qualitative (interviews, focus group discussions), and/or quantitative (randomised controlled  
207 trial, cohort, case-control, cross-sectional, case series, case report) study design; 5) written in  
208 English; 6) inclusion of (im)migrants, foreign workers, asylum seekers, and refugees, as these  
209 groups were all considered as the vulnerable migrant population in Malaysia.

210 Studies were excluded if they were: 1) conducted or included data from 1965 or earlier, as  
211 Singapore was one of the Malaya states until 1965, and this study is careful to only include  
212 Malaysia studies; 2) grey literature; 3) opinion papers, editorials, fieldnotes of symposia,  
213 conferences and workshop abstracts; 4) focused on non-citizens and foreigners, where it was  
214 unclear whether a vulnerable migrant population was included (such as permanent residents,  
215 naturalised persons, expatriates, temporary visitors, tourists, Malaysian returnees, and  
216 international students); 5) only presented migrants as a control variable and no other  
217 information regarding migrants was available.

**218 Data extraction**

219 Three reviewers (AS, DC, and NP) were involved in the screening process, where all had  
220 experience in the domain of public health and AS and NP had practical knowledge with  
221 respect to conducting systematic reviews due to previous research work. Titles and abstracts  
222 were exported by AS and subsequently moved into Rayyan, an open-source software  
223 designed to support systematic reviews. AS and DC were the main reviewers, where AS  
224 conducted an entire screening of titles and abstracts and DC assessed a randomly selected  
225 20% sample. Independent screening was carried out by using the 'blind' function of Rayyan,  
226 with both researchers working separately. The first stage involved screening titles and

## Materials and Methods

1  
2  
3 227 abstracts according to the selection criteria. Subsequently, AS and DC conducted an  
4  
5 228 independent full-text screening of all potential articles, and attached comments to each article  
6  
7  
8 229 on why the paper was included or excluded. After each screening stage, AS and DC  
9  
10 230 compared their findings and discussed the discrepancies. Conflicts were examined and  
11  
12 231 resolved by NP.

13  
14  
15 232 Following the full-text screening stage, the data were extracted by one reviewer (AS) and  
16  
17 233 disaggregated by the different dimensions of the BARHII framework, including the type of  
18  
19 234 migrant (social inequities), main health dimension (institutional inequities, living conditions,  
20  
21 235 risk behaviours, disease & injury, and morality & morbidity rates), and health subdimensions.

22  
23  
24  
25 236 For the next stage, a decision tree was developed to ensure that the correct quality appraisal  
26  
27 237 tool by study design was selected and to identify the level of evidence of included literature  
28  
29 238 (Figure 2).

30  
31  
32  
33 239

34  
35 240 [INSERT FIGURE 2]

36  
37  
38  
39 241

40  
41 242 This tree built on study design tree from the Centre for Evidence-Based Medicine (CEBM)<sup>18</sup>  
42  
43 243 and essentially allowed research of varying designs to be consistently, reliably classified into  
44  
45 244 one of several design families. First, a definitions table of included research designs was  
46  
47 245 developed to adapt specific characteristics of each definition into the decision tree to identify  
48  
49 246 the paper's study design (Table 1).

50  
51  
52  
53 247

54  
55 248 [INSERT TABLE 1]

56  
57  
58  
59 249  
60

## Materials and Methods

1  
2  
3 250 Second, Tomlin & Borgetto's<sup>23</sup> evidence model was utilised to identify the paper's level of  
4  
5 251 evidence, as the study designs that were included in their model were in line with the  
6  
7 252 included research designs in this study. In addition, it was one of the few models that  
8  
9 253 deconstructed the single-hierarchy framework and assigned study designs to different  
10  
11 254 categories depending on the study objective (e.g. if the study design did not aim to provide a  
12  
13 255 causal-relationship, but simply describe a particular outcome, the study design would be  
14  
15 256 classified as descriptive research), and, therefore, valued studies with different objectives  
16  
17 257 equally. The model consists of four dimensions, including descriptive research, experimental  
18  
19 258 research, outcome research, and qualitative research. Each of these dimensions contains four  
20  
21 259 subclasses to show the level of evidence – level 1 is the highest level of evidence and level 4  
22  
23 260 the lowest – for each subclass. The assignment of these levels to the different study designs  
24  
25 261 are based on the degree of internal validity/authenticity and external validity/transferability,  
26  
27 262 where level 1 is regarded with the highest level of these two measures and level 4 ranks the  
28  
29 263 lowest. Table 2 shows the different research dimensions that correspond with the included  
30  
31 264 study designs and level of evidence.  
32  
33  
34  
35  
36  
37  
38  
39  
40

41 266 [INSERT TABLE 2]  
42  
43  
44  
45  
46

47 268 After incorporating feedback and multiple testing rounds, where the total set of articles were  
48  
49 269 used each time, the final version of the decision tree – as seen in Figure 2 – was used to  
50  
51 270 extract the data.  
52  
53  
54

### 271 **Quality appraisal and level of evidence assessment**

55  
56  
57 272 Quality assessments of the included studies were conducted by one reviewer (AS) based on  
58  
59 273 the Joanna Briggs Institute (JBI) critical appraisal tools,<sup>24</sup> as this toolkit includes checklists  
60

## Materials and Methods

1  
2  
3 274 for a wide variety of study designs that are most in line with the previous established research  
4  
5 275 designs included in this study. Additional objective criteria specific to migrant health studies  
6  
7 276 were developed for each JBI checklist to increase their reliability in the specific topical area.  
8  
9 277 After discussing the additional criteria and piloting the tools, slight modifications were made  
10  
11 278 for the JBI tools, and these final versions were used to assess the quality of the papers  
12  
13  
14 279 (Supplementary file 3-9).

15  
16  
17 280 Questions were answered with 'Yes (V)' if the study met the criteria according to  
18  
19 281 descriptions provided in the final version of the JBI toolkit. 'No/Unclear (X)' was selected if  
20  
21 282 the study did not address the question or if information to assess the given criteria was  
22  
23 283 lacking. The score concerning the quality of the study was determined by summing up all  
24  
25 284 'Yes' answers and dividing this number by the total number of answered questions, which  
26  
27 285 differ by study design in the JBI tools. Questions that were answered with 'Not applicable  
28  
29 286 (N/A)' were excluded from the calculation. A three-band scoring index – low quality = 0% to  
30  
31 287 50%; moderate quality = above 50% and below 75%; and high quality = 75% or higher – was  
32  
33 288 developed to simplify the interpretation of the quality of the study and allow comparison of  
34  
35 289 quality between study types.

### 290 **Data analysis**

36  
37  
38 291 Data concerning the type of migrant, health dimension, health subdimension, research design,  
39  
40 292 level of evidence, and quality assessment score were imported into Microsoft Excel for Mac  
41  
42 293 (version 16.28). The mean quality score was calculated for the different variables, including  
43  
44 294 the type of migrant, health dimension, health subdimension, research design, and level of  
45  
46 295 evidence. RStudio (version 1.0.136; Macintosh; Intel Mac OS X 10\_15) was utilised to  
47  
48 296 conduct chi-square tests and a multiple-correspondence analysis (MCA). An MCA is a  
49  
50 297 descriptive technique that can be utilised to visually demonstrate patterns among categorical  
51  
52  
53  
54  
55  
56  
57  
58  
59  
60



## Materials and Methods

1  
2  
3 298 variables. It represents associations between categories of several variables – here, these  
4  
5 299 include the type of migrant, main health dimension, quality of the study, and research design  
6  
7  
8 300 – in a two-dimensional space, where the distance between categories is meaningful to show  
9  
10 301 existing relationships. The MCA allows categories with similar profiles to be grouped  
11  
12 302 together, where a closer distance of categories within the same quadrant demonstrates a  
13  
14 303 stronger relationship, whereas categories that are further apart and in opposite quadrants  
15  
16 304 present weaker associations.<sup>25</sup> In support of the MCA, a Chi-square test was conducted to  
17  
18 305 assess if there was an actual association among categories or if the established relationship  
19  
20 306 was by chance. It should be noted that a few studies included two BARHII dimensions, yet,  
21  
22 307 the analysis only allowed one dimension to be included. Therefore, only the most prominent  
23  
24 308 dimension was selected and used for the analysis.  
25  
26  
27  
28  
29  
30  
31  
32  
33  
34  
35  
36  
37  
38  
39  
40  
41  
42  
43  
44  
45  
46  
47  
48  
49  
50  
51  
52  
53  
54  
55  
56  
57  
58  
59  
60

## Results

**Results**

The study selection process is presented in Figure 3. After removing the duplicates, 1,282 original records were identified. A total of 1,136 papers were excluded after the title and abstract screening stage due to the paper focusing on another population of interest, lacking focus on a BARHII health dimension, no peer-reviewed research paper, and data before 1965, resulting in 146 articles eligible for the full-text screening stage. Subsequently, full-text articles were retrieved from these 146 records, and eventually, 67 papers met the inclusion criteria and were included in the scoping review.

[INSERT FIGURE 3]

**Characteristics of included papers**

This section first demonstrates the findings of each BARHII dimension, followed by the results on the quality and level of evidence of the included studies. Lastly, existing relationships between the type of study design, quality of the study, type of migrant, and main health dimension are shown. Table 3 presents a descriptive summary of all included articles, including the study design and its related level of evidence, study period, type of migrant, sample population, main health dimension, health subdimension, quality assessment score and a short description of the study.

[INSERT TABLE 3]

## Results

**331 Health dimension and type of migrant**

332 The literature was first assessed to understand the topical coverage of research against the six  
333 dimensions of the BARHII public health framework. The first dimension, social inequities,  
334 was used to describe our population of interest and refers to the type of migrants (e.g. foreign  
335 workers, asylum seekers and refugees, or unclassified migrants). The other five dimensions  
336 focussed on elements that influence the health status of the population of interest, including  
337 institutional inequities, living conditions, risk behaviour, disease and injury, and mortality  
338 and morbidity. These latter five categories are outlined below and include results on the types  
339 of migrants that were researched within these dimensions.

**340 *Institutional inequities***

341 One paper addressed the institutional inequities dimension<sup>65</sup> by exploring the inclusion of  
342 migrant workers into national universal health coverage (UHC) policies in five Association of  
343 Southeast Asian Nations (ASEAN) countries: Indonesia, Philippines, Malaysia, Thailand and  
344 Singapore. It stated that Malaysia has implemented a medical insurance policy for foreign  
345 labour by obligating documented migrant workers to be enrolled in private insurance  
346 schemes, as non-citizens have no access to UHC at public facilities.

**347 *Living conditions***

348 Eleven papers were classified under the living conditions dimension, where most articles  
349 (n=9/11) addressed the service environment subdimension.<sup>10 29 56 57 69 73 87 88 91</sup> All of these  
350 papers studied the asylum seeker and refugee population, except for one article that focused  
351 on migrant workers.<sup>87</sup> Half the studies used qualitative methods to explore barriers to  
352 healthcare utilisation and showed that language difficulties, discrimination, insufficient health  
353 literacy, and cultural differences were common issues. One study focused on the social

## Results

1  
2  
3 354 environment subdimension and showed that refugee children experience discrimination by  
4  
5 355 locals, such as stereotyping them as criminals and also by other refugees of different  
6  
7 356 ethnicities and national origins.<sup>89</sup> Santos et al<sup>62</sup> assessed elements related to the work  
8  
9 357 environment subdimension by investigating perceived environmental hazards among foreign  
10  
11 358 workers, demonstrating that noise and dust were perceived as the greatest occupational health  
12  
13 359 threats.  
14  
15

**Risk behaviours**

16  
17  
18 360  
19  
20  
21 361 Ten studies researched the risk behaviour dimension, with most articles (n=8/10) conducted  
22  
23 362 on general migrant populations without clear identification of which migrant categories were  
24  
25 363 included in their study.<sup>28 31 34 54 55 60 81 83</sup> Three of these articles focused on the sexual  
26  
27 364 behaviour subdimension, exploring risk behaviour related to human papillomavirus (HPV).  
28  
29 365 The studies showed that a significant number of migrant women have high HPV risk  
30  
31 366 behaviour due to lack of understanding with respect to cervical cancer, the screening process,  
32  
33 367 and poor knowledge concerning HPV vaccination.<sup>54 55 83</sup> Two papers, classified within the  
34  
35 368 'poor nutrition' subdimension, showed poor health outcomes among detained migrants due to  
36  
37 369 nutrition deficiencies.<sup>31 81</sup> The other articles among unclassified migrants included two  
38  
39 370 studies on the 'violence and abuse' subdimensions, exploring maternal filicide<sup>60</sup> and  
40  
41 371 neglecting children<sup>28</sup>; and one other study on the 'alcohol and other drugs' subdimension,  
42  
43 372 pertaining to the usage of inhalants<sup>34</sup>. All of these studies simply showed that migrants  
44  
45 373 represent a certain proportion of the identified cases. Only the study on the use of inhalants  
46  
47 374 presented more cases among migrants than among locals. Two final studies included foreign  
48  
49 375 workers and explored the 'hygiene and sanitation' and 'hazard and safety awareness'  
50  
51 376 subdimensions.<sup>70 75</sup> Kamaludin & How<sup>70</sup> stated that migrant workers had significantly less  
52  
53 377 knowledge regarding environmental health, such as air quality, natural hazards, sanitation,  
54  
55  
56  
57  
58  
59  
60

## Results

1  
2  
3 378 and industrial hazards, compared to local workers. Woh et al<sup>75</sup> investigated the level of  
4  
5 379 hygiene among migrant food handlers and argued that personal hygiene and sanitation  
6  
7 380 measures should be improved among migrant food handlers.  
8  
9

10  
11 381 ***Disease and injuries***  
12  
13

14 382 With a total of 46 studies, the disease & injury dimension presented the largest study field of  
15  
16 383 interest related to the BARHII framework. Foreign workers were with 36 articles the most  
17  
18 384 studied group of migrants,<sup>30 33 36 37 39-49 51-53 59 62 66-68 71 72 74 76-79 82 84-86 88 90</sup> while only six and  
19  
20 385 four articles included unclassified migrants<sup>32 38 50 58 61 63</sup> and refugee populations,<sup>26 27 64 80</sup>  
21  
22 386 respectively. The majority (n=27/46) of the articles studied communicable diseases, where 18  
23  
24 387 of these studies focused on parasites,<sup>27 30 32 36 37 41-45 52 67 68 77 78 82 84 90</sup> eight on bacteria,<sup>38 40 53 58</sup>  
25  
26 388 <sup>61 63 72 74</sup> and two on viruses.<sup>48 63</sup> Most of the studies were merely descriptive and presented  
27  
28 389 that migrants, irrespective of the defined type, represented a significant share among the  
29  
30 390 study populations. Non-communicable diseases were studied far less compared to  
31  
32 391 communicable diseases and were only specifically addressed in three articles.<sup>26 46 66</sup> Scheutz  
33  
34 392 et al<sup>26</sup> found high numbers of different non-communicable oral complications among  
35  
36 393 Vietnamese refugees, such as tooth decay and missing teeth. Vijian et al<sup>66</sup> compared the  
37  
38 394 difference in characteristics between foreign workers and Malaysian patients with perforated  
39  
40 395 peptic ulcers, showing that the treated foreign labour population were younger, experienced  
41  
42 396 fewer post-operative complications, and had smaller-sized ulcers compared to locals. Murty<sup>46</sup>  
43  
44 397 reported a case study, presenting a deceased migrant worker due to a cystic tumour in the  
45  
46 398 heart region.  
47  
48  
49  
50  
51  
52  
53

54  
55 399 In addition to the studies that focused on single disease outcomes, two studies were  
56  
57 400 conducted that presented distributions of various diseases among foreign workers, including  
58  
59 401 communicable and non-communicable disorders.<sup>39 88</sup> Five studies focused on the 'mental  
60

## Results

1  
2  
3 402 health' subdimension, where these studies concentrated on describing psychiatric disorders,<sup>33</sup>  
4  
5 403 determining quality of life-related risk factors,<sup>50 64</sup> and testing the effect of different coping  
6  
7 404 mechanisms and therapy sessions on the level of stress.<sup>76 80</sup> Nine studies explored the 'injury'  
8  
9 405 subdimension, where nearly all (n=8/9) studies focused on work-related injuries. Most of  
10  
11 406 these studies examined the prevalence of particular injury and traumas, including fatal  
12  
13 407 lightning strikes,<sup>47</sup> ocular trauma,<sup>71</sup> and other musculoskeletal pain.<sup>59 62 79</sup> Ratnasingam et al<sup>51</sup>  
14  
15 408 compared the number of occupational incidents between local workers and migrant workers,  
16  
17 409 where foreign workers had less accidents. In addition, two papers described the risk factors  
18  
19 410 for work-related injuries, such as high machine-related vibration exposure<sup>49</sup> and low levels of  
20  
21 411 the company's safety commitment (as assessed by the foreign workers themselves).<sup>85</sup>  
22  
23 412 Ya'acob et al<sup>86</sup> conducted an RCT to evaluate the impact of a specific workplace intervention  
24  
25 413 on musculoskeletal symptoms (MMS) among foreign labour and showed that the intervention  
26  
27 414 reduced musculoskeletal symptoms in the foot and ankle regions significantly compared to  
28  
29 415 the control group.  
30  
31  
32  
33  
34  
35

416 ***Mortality and morbidity***

36  
37  
38  
39  
40 417 Two papers addressed the mortality and morbidity dimension by showing incidence rates  
41  
42 418 among general cohorts of migrants. Zulkifli et al<sup>29</sup> conducted a study on maternal and child  
43  
44 419 health in Sabah and identified that infant mortality rates were significantly higher for  
45  
46 420 migrants compared to locals. Dony et al<sup>35</sup> also conducted a study in Sabah and showed that at  
47  
48 421 least 24% of new tuberculosis cases detected since 1990 were among migrants and that  
49  
50 422 leprosy incidence rates among migrants were on average 3.7 times higher than the incidence  
51  
52 423 rate among Malaysians.  
53  
54  
55  
56

57 424 **Level of evidence and quality of the study**  
58  
59  
60

## Results

1  
2  
3 425 After data extraction using the BARHII framework, the studies were assessed on the level of  
4  
5 426 evidence and quality. The decision tree was used to identify the research design and its  
6  
7 427 related level of evidence for each paper, and, subsequently, the JBI tool of the specific  
8  
9 428 research design was applied to conduct the quality assessment. In total, 65 articles were  
10  
11 429 assessed on the quality of the study disaggregated by BARHII dimension (Table 4) and  
12  
13 430 quality of the study disaggregated by level of evidence (Table 5). Two articles were excluded  
14  
15 431 from this assessment as their study designs – a scoping review<sup>65</sup> and mixed-method<sup>73</sup> design  
16  
17 432 – as the JBI tools do not accommodate these study designs. The quality assessment scores can  
18  
19 433 be found in Supplementary file 10.  
20  
21  
22  
23  
24  
25  
26  
27  
28  
29  
30  
31  
32  
33  
34  
35  
36  
37  
38  
39  
40  
41

435 [INSERT TABLE 4]

436

437 [INSERT TABLE 5]

438

439 In general, the quality of the evidence base on migrant health in Malaysia is low (49.2%) and  
440 consists mostly of level 3 evidence papers (n=27/65). Level 2 evidence represented 38.5% of  
441 the evidence base (n=25/65), followed by level 4 evidence papers (n=13/65). No level 1  
442 evidence studies (systematic reviews or meta-analyses) were identified.

#### 443 ***Study quality by migrant type***

444 Studies including asylum seekers and refugees have the highest mean quality (58.4%) and  
445 were represented mostly (n=6/9) by level 2 evidence papers. Yet, asylum seekers and

## Results

1  
2  
3 446 refugees are the least researched category among the three migrant groups (n=10, including a  
4  
5 447 non-appraised article). The majority of the papers (n=41) focused on foreign workers, where  
6  
7 448 the different levels of evidence were relatively equally divided (level 2=35%; level 3=37.5%;  
8  
9 449 level 4=27.5%). However, the overall quality of these papers was low (45.7%), presenting the  
10  
11 450 lowest score among the three migrant groups. Articles including unclassified migrants scored  
12  
13 451 an average quality of 52.7%, which is mainly (62.5%) derived from level 3 evidence papers.  
14  
15  
16  
17

**452 Study quality by health dimension**

18  
19  
20  
21 453 Four out of the five BARHII health dimensions were included in the quality assessment. The  
22  
23 454 institutional inequities dimension was excluded from the critical appraisal, as only one study  
24  
25 455 addressed this dimension and was based on a research design that was not covered by JBI  
26  
27 456 toolkit. The 'living conditions' dimension has the highest average score (59.7%) and included  
28  
29 457 mostly (60%) level 2 evidence studies. The average quality score for the 'risk behaviour'  
30  
31 458 dimension was low (48.7%), and the majority of the studies were within the descriptive  
32  
33 459 research design (level 2 = four papers; level 3 = three papers). The 'disease & injury'  
34  
35 460 dimension represented the largest (n=46/65) share of the evidence base and had the lowest  
36  
37 461 average quality (46.3%) of all four dimensions. Prevalence studies with (level 2 evidence)  
38  
39 462 and without an analytical element (level 3 evidence) were the most common research designs  
40  
41 463 (n=19/67 and n=13/67, respectively). Lastly, the mortality and morbidity dimension had a  
42  
43 464 low (47.9%) average quality and included one level 3 evidence study and one level 4  
44  
45 465 evidence study.  
46  
47  
48  
49  
50  
51  
52

**53 Study quality by study design**

54  
55  
56 467 Out of the four research dimensions, the descriptive research dimension represents the  
57  
58 468 majority (70.8%) of the evidence base with a mean quality of 47.7%. Within this category,  
59  
60



## Results

1  
2  
3 469 case reports (level 4 evidence) have the highest mean quality (81.5%), whereas prevalence  
4  
5 470 studies with an analytical component (level 2 evidence) have the lowest mean quality  
6  
7  
8 471 (39.7%). Only two papers were classified as experimental designs, where both studies were  
9  
10 472 randomised controlled trials (level 2 evidence) and had quality scores of 30.8% and 38.5%,  
11  
12 473 the lowest quality of all research designs. Observational research papers had a mean quality  
13  
14 474 score of 46.1%, ranging from 42.6% among analytical cross-sectional studies (level 4  
15  
16 475 evidence) to 56.7% for case-controls (level 3 evidence). The qualitative research dimension  
17  
18 476 had the highest mean quality and was the only research dimension with a high-quality score  
19  
20 477 (76%). Almost all of these papers (n=4/5) included qualitative studies with more rigor (level  
21  
22 478 2 evidence) and had a mean score of 82.5%. Nevertheless, there was one qualitative study  
23  
24 479 with less rigor (level 3 evidence) scored 50%.

#### 480 **Associations between different variables**

31  
32  
33 481 Figure 4. presents the results of the multiple-correspondence analysis (MCA), showing  
34  
35 482 different associations between four dimensions: 1) type of study design; 2) quality of the  
36  
37 483 study; 3) type of migrant; and 4) main health dimension. Chi-square test results are utilised to  
38  
39 484 assess whether relationships among the different variables were statistically significant.  
40  
41  
42  
43  
44 485

45  
46  
47 486 [INSERT FIGURE 4]  
48  
49  
50 487

51  
52  
53  
54 488 High-quality studies tend to include refugees and asylum seekers ( $X^2 = 17.005$ ,  $df = 4$ ,  $p$ -  
55  
56 489 value = 0.001928), focus on living conditions ( $X^2 = 131.94$ ,  $df = 6$ ,  $p$ -value =  $< 2.2e-16$ ), and  
57  
58 490 have a qualitative research design ( $X^2 = 656.35$ ,  $df = 12$ ,  $p$ -value =  $< 2.2e-16$ ). Moreover,  
59  
60

## Results

1  
2  
3 491 studies that include foreign workers tend to focus on diseases and injuries ( $X^2 = 374.52$ ,  $df =$   
4  
5 492 6,  $p\text{-value} = < 2.2e-16$ ) and contain a case report study design ( $X^2 = 576.87$ ,  $df = 12$ ,  $p\text{-value}$   
6  
7 493  $= < 2.2e-16$ ). Furthermore, research that includes the unclassified migrant population tended  
8  
9 494 to study the risk behaviour and mortality and morbidity dimensions ( $X^2 = 374.52$ ,  $df = 6$ ,  $p\text{-}$   
10  
11 495  $value = < 2.2e-16$ ). Lastly, prevalence studies, and, to a lesser extent, analytical cross-  
12  
13 496 sectional studies, tend to have a low-quality score ( $X^2 = 656.35$ ,  $df = 12$ ,  $p\text{-value} = < 2.2e\text{-}$   
14  
15 497 16).

16  
17  
18  
19  
20 49821  
22  
23  
24 499

For peer review only

Conclusion

## 500 **Discussion**

### 501 **Key findings**

502 This study describes the nature and quality of the existing evidence on migrant health in  
503 Malaysia. Future research priorities based on the existing evidence and identified gaps are  
504 summarised in Box 1.

506 [INSERT BOX 1]

507

508 Among the five BARHII health dimensions, institutional inequities and mortality and  
509 morbidity were the least represented. Yet, studies concerning the influence of governance on  
510 migrant health are of utmost importance, as overarching governance can affect health  
511 outcomes of other dimensions.<sup>92</sup> Similarly, epidemiological research on mortality and  
512 morbidity rates are necessary for population health statistics, to identify disease patterns,  
513 document changes over time, and inform plans of action to tackle these health issues.<sup>93</sup>

514 Further research should focus on or incorporate migrant health governance, as well as  
515 epidemiological research on morbidity and mortality among both migrants and non-migrants,  
516 to better understand the effects of policies on migrant health, which is particularly relevant in  
517 low- and middle-income countries (LMICs) where the evidence gap is so acute.<sup>94</sup> Non-health  
518 policies, including restrictive immigration policies, were associated with poor health  
519 outcomes in a recent systematic review on high-income countries.<sup>95</sup> It is therefore important  
520 that policies in other sectors (potentially including, e.g., immigration, labour, education) are  
521 assessed for their potential consequences for migrant health.

## Conclusion

1  
2  
3 522 Living conditions were represented in eleven studies and focused mainly (n=9/11) on the  
4  
5 523 service environment by addressing the healthcare setting. However, there is scarce  
6  
7 524 information on the social and economic environments that different categories of migrants  
8  
9 525 must navigate and no data on the physical environment at all. Research conducted in other  
10  
11 526 countries demonstrates the importance of these three subdimensions on migrant health.<sup>96 97 98</sup>  
12  
13 527 Shao et al<sup>96</sup> argued that inequalities regarding the level of income (economic environment)  
14  
15 528 influenced health outcomes among internal migrant workers in China. He & Wong<sup>97</sup> stated  
16  
17 529 that poor mental health among female migrant workers in China was related to gender-  
18  
19 530 specific stressors (social environment). Al-Khatib et al<sup>98</sup> demonstrated that poor housing  
20  
21 531 conditions (physical environment) in a refugee camp were directly associated with various  
22  
23 532 upper respiratory tract diseases. These studies underscore the importance of different  
24  
25 533 environments on migrant health, motivating a focus of future research on the effects of living  
26  
27 534 conditions on different health problems, besides just focussing on associations between living  
28  
29 535 conditions and healthcare utilization.  
30  
31  
32  
33  
34  
35  
36 536 Ten studies in the Malaysian context were conducted on risk behaviour with different  
37  
38 537 subdimensions, from hygiene and sanitation to violent and abusive behaviour. However, all  
39  
40 538 of these subdimensions were under-researched, as only limited elements of each  
41  
42 539 subdimension were discussed. For instance, three studies focused on sexual behaviour by  
43  
44 540 addressing HPV knowledge.<sup>54 55 83</sup> Yet, no attention was given to other sexual behaviour-  
45  
46 541 related topics, such as condom use, HIV knowledge, and birth control. Although these studies  
47  
48 542 have been conducted in Malaysia, this research is lacking in the migration-context.<sup>99 100 101</sup>  
49  
50 543 Therefore, future research should focus on broader aspects of each subdimension, as  
51  
52 544 demonstrated in research elsewhere. For example, Renzaho & Burns<sup>102</sup> addressed the 'poor  
53  
54 545 nutrition' subdimension by showing that dietary patterns among African migrants changed  
55  
56 546 negatively after arriving in Australia due to the increase intake of fast food and processed  
57  
58  
59  
60

## Conclusion

1  
2  
3 547 food. Ganle et al<sup>103</sup> concentrated on the sexual risk behaviour subdimension and stated that  
4  
5 548 71% of the sampled refugees in Ghana had transactional sex, and only 12% used  
6  
7  
8 549 contraceptives. Bosdriesz et al<sup>104</sup> compared smoking between migrants and non-migrants in  
9  
10 550 the United States (US) and showed that migrants smoke less than US citizens. As a  
11  
12 551 significant number of migrants in Malaysia come from Indonesia, a population that smokes  
13  
14 552 almost twice as much as Malaysians, smoking behaviour among this migrant group may  
15  
16 553 differ from locals.<sup>105</sup> Therefore, future research could further explore the differences in  
17  
18 554 smoking behaviours between Malaysians and migrants in Malaysia.  
19  
20  
21  
22  
23 555 Disease and Injury was the most researched dimension, representing more than two-thirds of  
24  
25 556 the evidence base on migrant health in Malaysia. Despite the strong representation, over half  
26  
27 557 the research papers concentrated on communicable diseases, while only a few examined non-  
28  
29 558 communicable diseases. As the World Health Organisation (WHO)<sup>106</sup> states that  
30  
31 559 approximately 74% of all deaths in Malaysia are attributable to non-communicable disease,  
32  
33 560 in particular cardiovascular disease, chronic respiratory disease, and diabetes, there is a need  
34  
35 561 to expand research on non-communicable disease trends and outcomes among migrant  
36  
37 562 population in Malaysia.  
38  
39  
40  
41  
42 563 We found that most studies were on foreign workers (n=41/67), and only 10 studies  
43  
44 564 examined asylum seekers and refugees as the primary population of interest. Furthermore,  
45  
46 565 eleven studies did not specify the included migrant population. The latter issue could have  
47  
48 566 occurred due to lacking information on the data used. For example, the Ministry of Health  
49  
50 567 (MOH) will not report anything more detailed than 'non-Malaysian', as no further  
51  
52 568 information on non-citizens are collected during patient registration at MOH facilities.  
53  
54 569 Ideally, all research on migrants should clearly specify the type of migrants being studied and  
55  
56 570 not omit crucial details, such as gender, visa status, and country of origin. Also, human  
57  
58  
59  
60

## Conclusion

1  
2  
3 571 trafficking could significantly affect a person's health and vulnerability, no studies were  
4  
5  
6 572 found that examined the health of trafficked persons and victims of forced labour in  
7  
8 573 Malaysia.<sup>107</sup> While the vulnerabilities experienced by the trafficked person intersects with  
9  
10 574 other migration-related vulnerabilities like gender, ethnicity or documentation status, victims  
11  
12 575 of human trafficking should be categorised separately, to reflect their own unique status and  
13  
14 576 vulnerability. The travel routes or modes of transportation used by migrants to come to  
15  
16 577 Malaysia may influence migrant health in different ways, as various different routes or modes  
17  
18 578 of transportation may be linked with specific hazards. Related to this issue is the lack of  
19  
20 579 evidence on migrant health with specific stages of migration, including pre-departure, travel,  
21  
22 580 destination interception, and return, where health outcomes might differ between these  
23  
24 581 stages.<sup>108</sup>

25  
26  
27  
28  
29 582 Lastly, this scoping review revealed that the average quality of studies on migrant health in  
30  
31 583 Malaysia is poor (49.2%) and that most of these studies have level 3 (n=27/65) or level 2  
32  
33 584 (n=25/65) evidence. Only qualitative studies with more rigour (level 2 evidence) and those  
34  
35 585 that focus on living conditions and include the refugee and asylum seeker populations, tend to  
36  
37 586 have a high-quality score. Therefore, there is a clear need to improve the quality of the  
38  
39 587 evidence base and produce papers with a higher level of evidence. Creating standard research  
40  
41 588 design-specific guidelines, if not existing already, and, subsequently, promoting these  
42  
43 589 materials among academics and research institutions, could increase the quality of future  
44  
45 590 research work. Furthermore, researchers should ensure that they follow study design specific  
46  
47 591 reporting guidelines (cite STROBE, CONSORT), to ensure that all relevant information is  
48  
49 592 captured in publications for further evidence synthesis, such as this review.  
50  
51  
52  
53  
54

## 593 **Limitations**

56  
57  
58  
59  
60

## Conclusion

1  
2  
3 594 This study is the first systematic literature synthesis and scoping review on migrant health in  
4  
5 595 Malaysia and presents a comprehensive overview of all identified peer-reviewed articles.  
6  
7  
8 596 Specific recommendations based on this research are provided to improve the evidence base  
9  
10 597 on migrant health in Malaysia. Furthermore, this paper makes methodological contributions  
11  
12 598 to migrant health research by providing a modified JBI toolkit and a decision tree to identify  
13  
14 599 the type of study design and corresponding level of evidence, both of which can be utilised in  
15  
16 600 other research fields as well. Yet, our review has several limitations. As this paper focuses  
17  
18 601 exclusively on vulnerable migrant populations within the non-citizen community in Malaysia,  
19  
20 602 we excluded other non-citizen groups such as expatriates and international students, based on  
21  
22 603 the assumption that these groups are less vulnerable. However, we acknowledge that other  
23  
24 604 non-citizen groups may face challenges in obtaining proper healthcare in Malaysia, such as  
25  
26 605 issues related to cultural competency among foreign students and retirees.<sup>109 110</sup> In addition,  
27  
28 606 papers including non-citizens without further description were excluded, although these  
29  
30 607 studies may have included the vulnerable migrant population.  
31  
32  
33  
34  
35  
36 608 Only academic peer-reviewed studies were included, thus excluding grey literature,  
37  
38 609 editorials, and opinion papers. Also, only English language articles were included, and papers  
39  
40 610 in Bahasa Malaysia (the Malay language) were not included.<sup>111</sup> As a result, much relevant  
41  
42 611 information that could potentially be used to inform both policies and practice could have  
43  
44 612 been excluded from this review.  
45  
46  
47  
48  
49 613 Inter-rater reliability was limited to a 20% sample of the records in the first screening stage,  
50  
51 614 and no data extraction nor quality assessment was verified by a second reviewer due to  
52  
53 615 resource constraints. Also, a decision tree or another selection format to objectively classify  
54  
55 616 the BARHII dimension and subdimension of each paper was not developed, and, therefore,  
56  
57 617 this paper might suffer from some selection bias. Yet, we anticipate low bias as the first  
58  
59  
60

## Conclusion

1  
2  
3 618 reviewer was the main researcher and was very familiar with the study design and included  
4  
5 619 frameworks.

6  
7  
8  
9 620 Besides the BARHII framework, various conceptual models of public health are available;  
10  
11 621 using a different framework could lead to the identification of other gaps in the evidence base  
12  
13 622 related to specific dimensions of health. For instance, the WHO Commission on Social  
14  
15 623 Determinants of Health (CSDH) framework includes material circumstances, such as food  
16  
17 624 availability, whereas this dimension is not included in the BARHII framework.<sup>112</sup> Similarly,  
18  
19 625 critical appraisal tools other than the JBI toolkit are available and could affect the scores of  
20  
21 626 the quality assessment. Yet, the JBI toolkit offers a wider range of study-design specific tools  
22  
23 627 compared to others. Both the BARHII framework as well as the JBI toolkit were compared to  
24  
25 628 other public health models and critical appraisal tools, respectively, and seemed to be the best  
26  
27 629 fit for this study.

28  
29  
30  
31  
32  
33 630 Likewise, a decision tree was developed by using the characteristics of the used definitions of  
34  
35 631 different research designs as well as the specific traits of Tomlin & Borgetto's<sup>23</sup> level of  
36  
37 632 evidence model. Using other definitions and level of evidence models could result in a  
38  
39 633 different level of evidence categorisation. However, we believe this review makes a strong  
40  
41 634 methodological contribution by combining study designs and level of evidence in a unified  
42  
43 635 decision tree, which can be used by researchers conducting systematic or scoping reviews  
44  
45 636 where accurate classifications of study design and associated evidence levels, is important.

46  
47  
48  
49  
50 637 In order to conduct the multiple-correspondence analysis (MCA), the dataset could only  
51  
52 638 include one unit per dimension for each paper. As some studies included multiple BARHII  
53  
54 639 dimensions, only the most prominent dimension was included in the analysis. As a result, the  
55  
56 640 analysis may suffer from some selection bias and present slightly different outcomes  
57  
58 641 compared to an analysis that includes the other BARHII dimensions.



## Conclusion

1  
2  
3 642 Lastly, no adjustments were made for outliers in the quality assessment. Therefore, some  
4  
5 643 papers with extremely high or low scores could have influenced specific dimensions and  
6  
7  
8 644 might not reflect the quality of those dimensions perfectly.  
9

10  
11 645 **Conclusion**

12  
13  
14 646 Migrant health remains an issue in Malaysia, yet the quality of the evidence needed to inform  
15  
16 647 policy is currently lacking. Research-specific reporting guidelines should be followed to  
17  
18 648 improve the credibility and quality of the evidence base. Furthermore, future research should  
19  
20 649 focus more on evidence gaps in the ‘mortality and morbidity’ and ‘institutional inequities’  
21  
22 650 dimensions, as well as certain subdimensions, such as non-communicable disease, housing  
23  
24 651 conditions, and physical inactivity, in order to provide a comprehensive picture of migrant  
25  
26 652 health in Malaysia. Apart from demonstrating the research gaps, this paper also makes  
27  
28 653 methodological contributions to migrant health research by providing a modified JBI toolkit  
29  
30 654 and a decision tree that identifies the type of study design and corresponding level of  
31  
32 655 evidence, both of which can be utilised in other research fields as well.  
33  
34  
35  
36  
37  
38  
39  
40  
41  
42  
43  
44  
45  
46  
47  
48  
49  
50  
51  
52  
53  
54  
55  
56  
57  
58  
59  
60

## References

**656 Acknowledgements:**

657 We would like to thank Andrew Seko for granting us permission on behalf of the Bay Area  
658 Regional Health Inequities Initiative (BARHII) for the use of their public health framework  
659 in this scoping review. We would also like to thank Norhayati Binti Yahya for providing us  
660 with the definition for non-citizens on behalf of the Department of Statistics Malaysia  
661 (DOSM). Lastly, we would like to thank the United Nations University – International  
662 Institute for Global Health (UNU-IIGH) for its continuous support throughout this project.

**663 Consent for publication:**

664 Consent regarding the use of the BARHII framework was granted by BARHII.

**665 Copyright/license for publication:**

666 The Corresponding Author has the right to grant on behalf of all authors and does grant on  
667 behalf of all authors, a worldwide licence to the Publishers and its licensees in perpetuity, in  
668 all forms, formats and media (whether known now or created in the future) to i) publish,  
669 reproduce, distribute, display and store the Contribution, ii) translate the Contribution into  
670 other languages, create adaptations, reprints, include within collections and create summaries,  
671 extracts and/or, abstracts of the Contribution, iii) create any other derivative work(s) based on  
672 the Contribution, iv) to exploit all subsidiary rights in the Contribution, v) the inclusion of  
673 electronic links from the Contribution to third party material where-ever it may be located;  
674 and, vi) licence any third party to do any or all of the above.

**675 Competing interests:**

676 All authors have completed the Unified Competing Interest form (available on request from  
677 the corresponding author) and declare: no support from any organisation for the submitted  
678 work; no financial relationships with any organisations that might have an interest in the

## References

1  
2  
3  
4 679 submitted work in the previous three years, no other relationships or activities that could  
5  
6 680 appear to have influenced the submitted work.  
7

8  
9 681 **Contributors:**

10  
11 682 AS, NP, MV and DC created the study protocol. AS and DC conducted abstract and full-text  
12  
13 683 screening, and NP solved undisputed conflicts. AS extracted the data, drafted the decision  
14  
15 684 tree, and modified the JBI tools, and NP, MV, DC and CL provided feedback during these  
16  
17 685 processes. CL and AS conducted the data analysis. AS drafted the initial version of the  
18  
19 686 manuscript and AS, NP, MV, CL, TL and DC critically revised and approved the final  
20  
21 687 version.  
22  
23  
24  
25

26 688 **Transparency declaration:**

27  
28  
29 689 This manuscript is an honest, accurate, and transparent account of the study being reported.  
30  
31 690 No important aspects of the study have been omitted, and any discrepancies from the study as  
32  
33 691 planned have been explained.  
34  
35

36 692 **Ethical approval:**

37  
38  
39 693 No ethics and consent were required for this scoping review.  
40  
41

42 694 **Funding:**

43  
44  
45 695 None.  
46  
47

48 696 **Role of the study sponsors:**

49  
50  
51 697 N/A  
52  
53

54 698 **Statement of independence of researchers from funders:**

55  
56  
57 699 N/A  
58  
59  
60

## References

1  
2  
3  
4 700 **Patient and public involvement:**

5  
6 701 N/A

7  
8  
9 702 **Trial registration details:**

10  
11  
12 703 N/A

13  
14  
15 704 **Data sharing:**

16  
17  
18 705 No additional data available.

19  
20  
21 706

22  
23  
24 707

25  
26  
27 708

28  
29  
30 709

31  
32  
33 710

34  
35  
36 711

37  
38  
39 712

40  
41  
42 713

43  
44  
45 714

46  
47  
48 715

49  
50  
51 716

52  
53  
54 717

55  
56  
57 718

58  
59  
60 719

## References

**References**

- 721 1. International Organization for Migration Global Migration Data Analysis Centre.  
722 Global migration indicators 2018. Berlin: International Organisation for Migration  
723 Global Migration Data Analysis Centre 2018.
- 724  
725 2. International Organization for Migration. Malaysia [Internet]. Kuala Lumpur:  
726 International Organization for Migration; 2019 [cited 2019 Apr 30]. Available from:  
727 <https://www.iom.int/countries/malaysia>
- 728  
729 3. Department of Statistics Malaysia. Population quick info [Internet]. Putrajaya:  
730 Department of Statistics Malaysia; 2020 [updated 2020 Apr 30; cited 2020 Apr 30].  
731 Available from:  
732 [https://www.dosm.gov.my/v1/index.php?r=column/cone&menu\\_id=b2RVUmEyZZZ](https://www.dosm.gov.my/v1/index.php?r=column/cone&menu_id=b2RVUmEyZZZ)  
733 [ZYXhaUzUrdnpsaWozdz09](https://www.dosm.gov.my/v1/index.php?r=column/cone&menu_id=b2RVUmEyZZZ)
- 734  
735 4. Department of Statistics Malaysia. Current population estimates Malaysia 2019.  
736 Putrajaya: Department of Statistics Malaysia.
- 737  
738 5. Office of the United Nations High Commissioner for Human Rights. The rights of  
739 non-citizens. Geneva: United Nations 2006.
- 740  
741 6. International Organization for Migration. Glossary on migration. 2<sup>nd</sup> ed. Geneva:  
742 International Organization for Migration 2011.
- 743

## References

- 1  
2  
3  
4 744 7. Ministry of Home Affairs Malaysia. Statistik pekerja asing terkini mengikut negeri  
5  
6 745 dan sektor [Internet]. Putrajaya: Ministry of Home Affairs Malaysia; 2019 [updated  
7  
8 746 2019 Aug 1; cited 2020 Apr 14]. Available from:  
9  
10 747 [http://www.data.gov.my/data/ms\\_MY/dataset/statistik-pekerja-asing-terkini-  
12 mengikut-negeri-dan-sektor](http://www.data.gov.my/data/ms_MY/dataset/statistik-pekerja-asing-terkini-<br/>11 mengikut-negeri-dan-sektor)  
13 748  
14  
15 749  
16  
17 750 8. Chan CK. Malaysia: migration, rights, and health security. New Paradigms for a  
18  
19 751 Changing Migration Landscape Conference to commemorate International Migrants  
20  
21 752 Day. Bangkok: Chulalongkorn University; 2015 Dec 17.  
22  
23  
24 753  
25  
26 754 9. United Nations High Commissioner for Refugees. Figures at a glance in Malaysia  
27  
28 755 [Internet]. Kuala Lumpur: United Nations High Commissioner for Refugees; 2019  
29  
30 756 [cited 2019 Nov 20]. Available from: [https://www.unhcr.org/en-my/figures-at-a-  
32 glance-in-malaysia.html](https://www.unhcr.org/en-my/figures-at-a-<br/>31 glance-in-malaysia.html)  
33 757  
34  
35 758  
36  
37 759 10. Chuah FL, Tan ST, Yeo J, Legido-Quigley H. The health needs and access barriers  
38  
39 760 among refugees and asylum-seekers in Malaysia: a qualitative study. International  
40  
41 761 Journal for Equity in Health. 2018 Dec 1;17(1):120.  
42  
43  
44 762  
45  
46 763 11. Devadason ES, Meng CW. Policies and laws regulating migrant workers in Malaysia:  
47  
48 764 A critical appraisal. Journal of Contemporary Asia. 2014 Jan 2;44(1):19-35.  
49  
50  
51 765  
52  
53 766 12. International Organization for Migration. IOM handbook: protection and assistance  
54  
55 767 for migrants vulnerable to violence, exploitation and abuse. Geneva: International  
56  
57 768 Organization for Migration 2018.  
58  
59  
60

## References

1  
2  
3  
4 769  
5  
6 770  
7  
8 771  
9  
10 772  
11  
12  
13 773  
14  
15 774  
16  
17 775  
18  
19 776  
20  
21 777  
22  
23  
24 778  
25  
26 779  
27  
28 780  
29  
30 781  
31  
32  
33 782  
34  
35 783  
36  
37 784  
38  
39 785  
40  
41 786  
42  
43 787  
44  
45 788  
46  
47 789  
48  
49 790  
50  
51 791  
52  
53  
54 792  
55  
56 793  
57  
58  
59  
60

13. Pocock NS, Suphanchaimat R, Chan CK, Faller EM, Harrigan N, Pillai V, Wickramage K. Reflections on migrant and refugee health in Malaysia and the ASEAN region. *BMC Proceedings*. 2018 Apr;12(Suppl 4):4.
14. Lasimbang HB, Tong WT, Low WY. Migrant workers in Sabah, East Malaysia: The importance of legislation and policy to uphold equity on sexual and reproductive health and rights. *Best Practice & Research Clinical Obstetrics & Gynaecology*. 2016 Apr 1;32:113-23.
15. Sweileh WM, Wickramage K, Pottie K, Hui C, Roberts B, Sawalha AF, Zyoud SH. Bibliometric analysis of global migration health research in peer-reviewed literature (2000–2016). *BMC Public Health*. 2018 Dec;18(1):777.
16. Tricco AC, Lillie E, Zarin W, O'Brien KK, Colquhoun H, Levac D, Moher D, Peters MD, Horsley T, Weeks L, Hempel S. PRISMA extension for scoping reviews (PRISMA-ScR): Checklist and explanation. *Annals of Internal Medicine*. 2018 Oct 2;169(7):467-73.
17. Bay Area Regional Health Inequities Initiative. Framework [Internet]. Oakland, CA: Bay Area Regional Health Inequities Initiative; 2015 [cited 2019 Sep 18]. Available from: <http://barhii.org/framework/>
18. Centre for Evidence-Based Medicine. Study designs. Oxford: Centre for Evidence-Based Medicine; 2019 [cited 2019 Oct 10]. Available from:

## References

- 1  
2  
3  
4 794 <https://www.cebm.net/2014/04/study-designs/>  
5  
6 795  
7  
8 796 19. Centre for Cognitive Ageing and Cognitive Epidemiology. Systematic reviews and  
9  
10 797 meta-analyses: A step-by-step guide. Edinburgh: Centre for Cognitive Ageing and  
11  
12 798 Cognitive Epidemiology; 2013 [cited 2019 Oct 15]. Available from:  
13  
14 799 [https://www.ccace.ed.ac.uk/research/software-resources/systematic-reviews-and-  
17  
18 801 meta-analyses](https://www.ccace.ed.ac.uk/research/software-resources/systematic-reviews-and-<br/>15<br/>16 800 meta-analyses)  
19  
20 802  
21 803 20. Alexander LK, Lopes B, Ricchetti-Masterson K, Yeatts KB. *ERIC notebook* [2<sup>nd</sup> ed].  
22  
23 804 Chapel Hill: Epidemiologic Research and Information Center, 2015.  
24  
25 805  
26 806 21. Cochrane Community. Glossary. London: Cochrane Community; 2019 [cited 2019  
27  
28 807 Nov 2]. Available from: <https://community.cochrane.org/glossary#letter-N>  
29  
30 808  
31 809 22. Peacock JL, Peacock PJ. *Oxford Handbook of Medical Statistics*. Oxford: Oxford  
32  
33 810 University Press 2011.  
34  
35 811  
36 812 23. Tomlin G, Borgetto B. Research pyramid: A new evidence-based practice model for  
37  
38 813 occupational therapy. *American Journal of Occupational Therapy*. 2011 Mar  
39  
40 814 1;65(2):189-96.  
41  
42 815  
43 816 24. Aromataris E, Munn Z, editors. *Joanna Briggs Institute Reviewer's Manual*. Joanna  
44  
45 817 Briggs Institute, 2017. Available from:  
46  
47 818 <https://wiki.joannabriggs.org/display/MANUAL/JBI+Reviewer%27s+Manual>  
48  
49  
50  
51  
52  
53  
54  
55  
56  
57  
58  
59  
60



## References

- 1  
2  
3  
4 819 25. Le Roux B, Rouanet H. *Multiple correspondence analysis*. London: Sage 2010.  
5  
6 820  
7  
8 821 26. Scheutz F, Heidmann J, Poulsen S. Dental health of Vietnamese boat people on Pulau  
9  
10 822 Bidong, Malaysia. *Community Dentistry and Oral Epidemiology*. 1983  
11  
12 823 Aug;11(4):255-8.  
13  
14 824  
15  
16  
17 825 27. Levy J. Epidemiological survey of intestinal parasitic infections in children of Sabah,  
18  
19 826 Malaysia. *Journal of Public Health*. 1988 Aug 1;10(3):240-9.  
20  
21 827  
22  
23  
24 828 28. Kassim MS, George R, Kassim K, Begum M, Cherian MP, Tajudin AK, Chandran V,  
25  
26 829 Anan A, Reddy R, Singh J. Child abuse and neglect as seen in General Hospital,  
27  
28 830 Kuala Lumpur – A two year study. *The Medical Journal of Malaysia*. 1989  
29  
30 831 Jun;44(2):111-21.  
31  
32 832  
33  
34  
35 833 29. Zulkifli SN, U KM, Yusof K, Lin WY. Maternal and child health in urban Sabah,  
36  
37 834 Malaysia: a comparison of citizens and migrants. *Asia Pacific Journal of Public*  
38  
39 835 *Health*. 1994 Jul;7(3):151-8.  
40  
41 836  
42  
43  
44 837 30. Rajeswari B, Sinniah B, Hussein H. Socio-economic factors associated with intestinal  
45  
46 838 parasites among children living in Gombak, Malaysia. *Asia Pacific Journal of Public*  
47  
48 839 *Health*. 1994 Jan 1:21-5.  
49  
50 840  
51  
52  
53 841 31. Jeyakumar D. Thiamine responsive ankle oedema in detention centre inmates. *The*  
54  
55 842 *Medical Journal of Malaysia*. 1995 Mar;50(1):17-20.  
56  
57 843  
58  
59  
60

## References

- 1  
2  
3  
4 844 32. Jamaiah I, Anuar AK, Najib NA, Zurainee MN. Imported malaria: a retrospective  
5  
6 845 study in University Hospital, Kuala Lumpur, a ten-year experience. Medical Journal  
7  
8 846 of Malaysia. 1998;53(1):6-9.  
9  
10 847  
11  
12 848 33. Krahl W, Hashim A. Psychiatric disorders in ASEAN-migrants in Malaysia – A  
13  
14 university hospital experience. The Medical Journal of Malaysia. 1998 Sep;53(3):232-  
15 849  
16 8.  
17 850  
18  
19 851  
20  
21 852 34. Zabedah MY, Razak M, Zakiah I, Zuraidah AB. Profile of solvent abusers (glue  
22  
23 sniffers) in East Malaysia. The Malaysian Journal of Pathology. 2001 Dec;23(2):105-  
24 853  
25 9.  
26 854  
27  
28 855  
29  
30 856 35. Dony JF, Ahmad J, Tiong YK. Epidemiology of tuberculosis and leprosy, Sabah,  
31  
32 Malaysia. Tuberculosis. 2004 Jan 1;84(1-2):8-18.  
33 857  
34  
35 858  
36  
37 859 36. Chandran PA, Jayaram G, Mahmud R, Anuar AK. Microfilaria in hydrocele fluid  
38  
39 cytology. The Malaysian Journal of Pathology. 2004 Dec;26(2):119-23.  
40 860  
41  
42 861  
43  
44 862 37. Nissapatorn V, Lim YA, Jamaiah I, Agnes LS, Amyliana K, Wen CC, Nurul H,  
45  
46 Nizam S, Quake CT, Valartmathi C, Woei CY. Parasitic infections in Malaysia:  
47 863  
48 Changing and challenges. Southeast Asian Journal of Tropical Medicine and Public  
49 864  
50 Health. 2005;36:50-9.  
51 865  
52  
53 866  
54  
55  
56  
57  
58  
59  
60

## References

- 1  
2  
3  
4 867 38. Sobri M, Merican JS, Nordiyana M, Valarmathi S, Al-Edrus SA. Neuroimaging  
5  
6 868 features of tuberculous meningitis. *Medical Journal of Malaysia*. 2006 Mar;61(1):36-  
7  
8 869 40.  
9  
10 870  
11  
12 871 39. Leong CC. Pre-employment medical examination of Indonesian domestic helpers in a  
13  
14 private clinic in Johor Bahru – An eight year review. *Medical Journal of Malaysia*.  
15 872  
16 2006 Dec;61(5):592.  
17 873  
18  
19 874  
20  
21 875 40. Sasidharan S, Uyub AM, Azlan AA. Further evidence of ethnic and gender  
22  
23 differences for *Helicobacter pylori* infection among endoscoped patients. *Transactions*  
24 876  
25 of the Royal Society of Tropical Medicine and Hygiene. 2008 Dec 1;102(12):1226-  
26 877  
27 32.  
28 878  
29  
30 879  
31  
32 880 41. Masitah M. Malaria among foreign workers in Selangor, Malaysia. *Journal of Health*  
33  
34 and Translational Medicine. 2008 Dec 28;11(2):53-8.  
35 881  
36  
37 882  
38  
39 883 42. Shailendra S, Prepageran N. Oropharyngeal rhinosporidiosis in a migrant worker: A  
40  
41 delayed presentation. *Medical Journal of Malaysia*. 2008 Mar;63(1):65.  
42 884  
43  
44 885  
45  
46 886 43. Chan BT, Amal RN, Noor Hayati MI, Kino H, Anisah N, Norhayati M, Sulaiman O,  
47  
48 Mohammed Abdullah M, Fatmah MS, Roslida AR, Ismail G. Seroprevalence of  
49 887  
50 toxoplasmosis among migrant workers from different Asian countries working in  
51 888  
52 Malaysia. *Southeast Asian Journal of Tropical Medicine and Public Health*. 2008  
53 889  
54 Jan;39(1):9.  
55  
56 890  
57  
58 891  
59  
60

## References

- 1  
2  
3  
4 892 44. Farhana F, Jamaiah I, Rohela M, Abdul-Aziz NM, Nissapatorn V. A ten year (1999-  
5  
6 893 2008) retrospective study of amoebiasis in University Malaya Medical Centre  
7  
8 894 (UMMC), Kuala Lumpur, Malaysia. *Tropical Biomedicine*. 2009 Dec 1;26:262-6.  
9  
10 895  
11  
12 896 45. Chan BT, Amal RN, Noor Hayati MI, Kino H, Anisah N, Norhayati M. Comparative  
13  
14  
15 897 study of seroprevalence of toxoplasmosis between local workers and migrant workers  
16  
17 898 in Malaysia. *Archives of Medical Science*. 2009 Apr 1;5(2):255.  
18  
19 899  
20  
21 900 46. Murty OP. Cystic tumor of papillary muscle of heart: A rare finding in sudden death.  
22  
23  
24 901 *The American Journal of Forensic Medicine and Pathology*. 2009 Jun 1;30(2):201-3.  
25  
26 902  
27  
28 903 47. Murty OP, Kian CK, Husin MH, Yusuf WY. Fatal lightning strikes in Malaysia: A  
29  
30  
31 904 review of 27 fatalities. *The American Journal of Forensic Medicine and Pathology*.  
32  
33 905 2009 Sep 1;30(3):246-51.  
34  
35 906  
36  
37 907 48. Mustafa B, Hani AW, Mariam M, Khairul AH, Abdul Rasid K. Epidemiological and  
38  
39  
40 908 clinical features of dengue versus other acute febrile illnesses amongst patients seen at  
41  
42 909 government polyclinics. *Medical Journal of Malaysia*. 2010 Dec 1;65(4):291-6.  
43  
44 910  
45  
46 911 49. Su TA, Hoe VC, Masilamani R, Mahmud AB. Hand-arm vibration syndrome among a  
47  
48  
49 912 group of construction workers in Malaysia. *Occupational and Environmental*  
50  
51 913 *Medicine*. 2011 Jan 1;68(1):58-63.  
52  
53 914  
54  
55 915 50. Daher AM, Ibrahim HS, Daher TM, k Anbori A. Health related quality of life among  
56  
57 916 Iraqi immigrants settled in Malaysia. *BMC Public Health*. 2011 Dec 1;11(1):407.  
58  
59  
60

## References

- 1  
2  
3  
4 917  
5  
6 918 51. Ratnasingam J, Ioras F, Ishak MK. Migrant contract workers and occupational  
7  
8 919 accidents in the furniture industry. *Journal of Applied Sciences*. 2011  
9  
10 920 Dec;11(14):2646-51.  
11  
12  
13 921  
14  
15 922 52. Ab Rahman AK, Abdullah FH. Visceral leishmaniasis (kala-azar) and malaria  
16  
17 923 coinfection in an immigrant in the state of Terengganu, Malaysia: A case report.  
18  
19 924 *Journal of Microbiology, Immunology and Infection*. 2011 Feb 1;44(1):72-6.  
20  
21  
22 925  
23  
24 926 53. Taib T, Baba R. Clinical characteristics of patients with leprosy in Hospital Kuala  
25  
26 927 Lumpur. *Malaysian Journal of Dermatology*. 2013 Jan 1;31:30-6.  
27  
28  
29 928  
30  
31 929 54. Osman MT, Al-Naggar RA, Taha BI. Knowledge and awareness of cervical cancer  
32  
33 930 screening among Iraqi immigrant women living in Malaysia. *World Journal of*  
34  
35 931 *Medical Sciences*. 2013;8(2):123-9.  
36  
37  
38 932  
39  
40 933 55. Minhat HS, Mustafa J, Sarabi S. Sociodemographic determinants of knowledge on  
41  
42 934 HPV vaccination among Iranian women living in Malaysia. *Academic Journal of*  
43  
44 935 *Cancer Research*. 2013;6(1):8-12.  
45  
46  
47 936  
48  
49 937 56. Mendelsohn JB, Rhodes T, Spiegel P, Schilperoord M, Burton JW, Balasundaram S,  
50  
51 938 Wong C, Ross DA. Bounded agency in humanitarian settings: A qualitative study of  
52  
53 939 adherence to antiretroviral therapy among refugees situated in Kenya and Malaysia.  
54  
55 940 *Social Science & Medicine*. 2014 Nov 1;120:387-95.  
56  
57  
58 941  
59  
60

## References

- 1  
2  
3  
4 942 57. Mendelsohn JB, Schilperoord M, Spiegel P, Balasundaram S, Radhakrishnan A, Lee  
5  
6 943 CK, Larke N, Grant AD, Sondorp E, Ross DA. Is forced migration a barrier to  
7  
8 944 treatment success? Similar HIV treatment outcomes among refugees and a  
9  
10 945 surrounding host community in Kuala Lumpur, Malaysia. *AIDS and Behavior*. 2014  
11  
12 946 Feb 1;18(2):323-34.  
13  
14  
15 947  
16  
17 948 58. Kwan Z, Pailoor J, Tan LL, Robinson S, Wong SM, Ismail R. Leprosy: An imported  
18  
19 949 disease. *Leprosy Review*. 2014 Sep 1;85(3):170-6.  
20  
21  
22 950  
23  
24 951 59. Santos A, Ramos HM, Ramasamy G, Fernandes C. Prevalence of musculoskeletal  
25  
26 952 pain in a sample of migrant workers in the manufacturing industry in Malaysia. *Public*  
27  
28 953 *Health*. 2014 Aug;128(8):759.  
29  
30  
31 954  
32  
33 955 60. Razali S, Salleh RI, Yahya B, Ahmad SH. Maternal filicide among women admitted  
34  
35 956 to forensic psychiatric institutions in Malaysia: Case series. *East Asian Archives of*  
36  
37 957 *Psychiatry*. 2015 Jun;25(2):79.  
38  
39  
40 958  
41  
42 959 61. Elmi OS, Hasan H, Abdullah S, Jeab MZ, Alwi ZB, Naing NN. Multidrug-resistant  
43  
44 960 tuberculosis and risk factors associated with its development: A retrospective study.  
45  
46 961 *The Journal of Infection in Developing Countries*. 2015 Oct 29;9(10):1076-85.  
47  
48  
49 962  
50  
51 963 62. Santos A, Ramos HM, Ramasamy G, Fernandes C. Musculoskeletal pain among  
52  
53 964 migrant workers in the Malaysian manufacturing industry: the impact of the physical  
54  
55 965 environment, workload and work patterns. *Pertanika Journal of Social Sciences &*  
56  
57 966 *Humanities*. 2015 Jun 1;23:315-24.  
58  
59  
60

## References

- 1  
2  
3  
4 967  
5  
6 968 63. William T, Parameswaran U, Lee WK, Yeo TW, Anstey NM, Ralph AP. Pulmonary  
7  
8 969 tuberculosis in outpatients in Sabah, Malaysia: Advanced disease but low incidence of  
9  
10 970 HIV co-infection. *BMC Infectious Diseases*. 2015 Dec 1;15(1):32.  
11  
12  
13 971  
14  
15 972 64. Siah PC, Lee WY, Goh LY. Quality of life among refugee children in Malaysia – A  
16  
17 973 brief report. *Vulnerable Children and Youth Studies*. 2015 Oct 2;10(4):294-9.  
18  
19  
20 974  
21  
22 975 65. Guinto RL, Curran UZ, Suphanchaimat R, Pocock NS. Universal health coverage in  
23  
24 976 ‘One ASEAN’: Are migrants included? *Global Health Action*. 2015 Dec  
25  
26 977 1;8(1):25749.  
27  
28  
29 978  
30  
31 979 66. Vijian K, Tata MD, Palayan K. Comparison of features and outcomes of perforated  
32  
33 980 peptic ulcer between Malaysians and foreigners. *Medical Journal of Malaysia*. 2016  
34  
35 981 Feb 1;71(1):13.  
36  
37  
38 982  
39  
40 983 67. Azian MN, Hakim SL, Khadri MS, Yusri MY, Adela JI, Noor M, Nurhainis OS,  
41  
42 984 Karnan G, Shamilah H. Leishmaniasis in Peninsular Malaysia: The role of immigrant  
43  
44 985 workers and the vector. *Southeast Asian Journal of Tropical Medicine and Public*  
45  
46 986 *Health*. 2016 Jul 1;47(4):607-16.  
47  
48  
49 987  
50  
51 988 68. Sahimin N, Lim YA, Ariffin F, Behnke JM, Lewis JW, Zain SN. Migrant workers in  
52  
53 989 Malaysia: Current implications of sociodemographic and environmental  
54  
55 990 characteristics in the transmission of intestinal parasitic infections. *PLoS Neglected*  
56  
57 991 *Tropical Diseases*. 2016 Nov;10(11).

## References

- 1  
2  
3  
4 992  
5  
6 993 69. Noh NA, Wahab HA, Bakar Ah SH, Islam MR. Public health services for foreign  
7  
8 994 workers in Malaysia. *Social Work in Public Health*. 2016 Jul 28;31(5):419-30.  
9  
10 995  
11  
12 996 70. Kamaludin NA, How V. The inequality of environmental health awareness among  
13  
14 997 foreign immigrants and local blue-collar workers in Kuala Lumpur, Malaysia.  
15  
16 998 *Environmental Justice*. 2016 Dec 1;9(6):181-7.  
17  
18 999  
19  
20 1000 71. Min NN, Vasudevan SK, Jasman AA, Aisyahbinti A, Myint KT. Work-related ocular  
21  
22 1001 injuries in Johor Bahru, Malaysia. *International Eye Science*. 2016;16(3):416-22.  
23  
24 1002  
25  
26 1003 72. Woh PY, Thong KL, Behnke JM, Lewis JW, Zain SN. Characterization of  
27  
28 1004 nontyphoidal *Salmonella* isolates from asymptomatic migrant food handlers in  
29  
30 1005 Peninsular Malaysia. *Journal of Food Protection*. 2017 Aug;80(8):1378-83.  
31  
32 1006  
33  
34 1007 73. Tanabe M, Myers A, Bhandari P, Cornier N, Doraiswamy S, Krause S. Family  
35  
36 1008 planning in refugee settings: Findings and actions from a multi-country study.  
37  
38 1009 *Conflict and Health*. 2017 Dec;11(1):9.  
39  
40 1010  
41  
42 1011 74. Ratnalingam V, Umapathy T, Sumugam K, Hanafi H, Retnasabapathy S. Microbial  
43  
44 1012 keratitis in West and East Malaysia. *Internal Eye Science*. 2017;17(11):1989-92.  
45  
46 1013  
47  
48 1014 75. Woh PY, Thong KL, Lim YA, Behnke JM, Lewis JW, Mohd Zain SN.  
49  
50 1015 Microorganisms as an indicator of hygiene status among migrant food handlers in  
51  
52 1016 Peninsular Malaysia. *Asia Pacific Journal of Public Health*. 2017 Oct;29(7):599-607.  
53  
54  
55  
56  
57  
58  
59  
60



## References

- 1  
2  
3  
4 1017  
5  
6 1018 76. Noor NM, Shaker MN. Perceived workplace discrimination, coping and  
7  
8 1019 psychological distress among unskilled Indonesian migrant workers in Malaysia.  
9  
10 1020 International Journal of Intercultural Relations. 2017 Mar 1;57:19-29.  
11  
12  
13 1021  
14  
15 1022 77. Noordin R, Mohd Zain SN, Yunus MH, Sahimin N. Seroprevalence of lymphatic  
16  
17 1023 filariasis among migrant workers in Peninsular Malaysia. Transactions of The Royal  
18  
19 1024 Society of Tropical Medicine and Hygiene. 2017 Aug 1;111(8):370-2.  
20  
21  
22 1025  
23  
24 1026 78. Sahimin N, Lim YA, Ariffin F, Behnke JM, Basáñez MG, Walker M, Lewis JW,  
25  
26 1027 Noordin R, Abdullah KA, Zain SN. Socio-demographic determinants of Toxoplasma  
27  
28 1028 gondii seroprevalence in migrant workers of Peninsular Malaysia. Parasites &  
29  
30 1029 Vectors. 2017 Dec 1;10(1):238.  
31  
32  
33 1030  
34  
35 1031 79. Labao HC, Faller EM, Bacayo MF. 'Aches and pains' of Filipino migrant workers in  
36  
37 1032 Malaysia: A profile of work-related musculoskeletal disorders. Annals of Global  
38  
39 1033 Health. 2018;84(3):474.  
40  
41  
42 1034  
43  
44 1035 80. Shaw SA, Ward KP, Pillai V, Hinton DE. A group mental health randomized  
45  
46 1036 controlled trial for female refugees in Malaysia. American Journal of Orthopsychiatry.  
47  
48 1037 2018 Jul 23.  
49  
50 1038  
51  
52 1039 81. Rahman SA, Jeffree MS, Kamaludin F, Din IA, Yusof M, Ahmed K. Beriberi  
53  
54 1040 outbreak among unauthorised immigrants in a detention camp in Malaysia. Journal of  
55  
56 1041 Immigrant and Minority Health. 2018 Oct 1;20(5):1294-7.  
57  
58  
59  
60

## References

1  
2  
3  
4 1042  
5  
6 1043  
7  
8 1044  
9  
10 1045  
11  
12 1046  
13  
14 1047  
15  
16 1048  
17  
18 1049  
19  
20 1050  
21  
22 1051  
23  
24 1052  
25  
26 1053  
27  
28 1054  
29  
30 1055  
31  
32 1056  
33  
34 1057  
35  
36 1058  
37  
38 1059  
39  
40 1060  
41  
42 1061  
43  
44 1062  
45  
46 1063  
47  
48 1064  
49  
50 1065  
51  
52 1066  
53  
54  
55  
56  
57  
58  
59  
60

82. Sahimin N, Douadi B, Lim AL, Behnke JM, Zain SN. Distribution of *Giardia duodenalis* (Assemblages A and B) and *Cryptosporidium parvum* amongst migrant workers in Peninsular Malaysia. *Acta Tropica*. 2018 Jun 1;182:178-84.
83. Nwabichie CC, Manaf RA, Ismail SB. Factors affecting uptake of cervical cancer screening among African women in Klang Valley, Malaysia. *Asian Pacific Journal of Cancer Prevention*. 2018;19(3):825.
84. Jeffree SM, Ahmed K, Safian N, Hassan R, Mihat O, Lukman KA, Shamsudin SB, Kamaludin F. Falciparum malaria outbreak in Sabah linked to an immigrant rubber tapper. *The American Journal of Tropical Medicine and Hygiene*. 2018 Jan 10;98(1):45-50.
85. Zerguine H, Tamrin SB, Jalaludin J. Prevalence, source and severity of work-related injuries among “foreign” construction workers in a large Malaysian organisation: A cross-sectional study. *Industrial Health*. 2018:2017-0205.
86. Ya’acob NA, Abidin EZ, Rasdi I, Rahman AA, Ismail S. Reducing work-related musculoskeletal symptoms through implementation of Kiken Yochi training intervention approach. *Work*. 2018 Jan 1;60(1):143-52.
87. Loganathan T, Rui D, Ng CW, Pocock NS. Breaking down the barriers: Understanding migrant workers’ access to healthcare in Malaysia. *PloS one*. 2019;14(7).

## References

1  
2  
3  
4 1067  
5  
6 1068  
7  
8 1069  
9  
10 1070  
11  
12  
13 1071  
14  
15 1072  
16  
17 1073  
18  
19 1074  
20  
21 1075  
22  
23  
24 1076  
25  
26 1077  
27  
28 1078  
29  
30 1079  
31  
32 1080  
33  
34 1081  
35  
36 1082  
37  
38 1083  
39  
40 1084  
41  
42 1085  
43  
44 1086  
45  
46 1087  
47  
48 1088  
49  
50 1089  
51  
52 1090  
53  
54 1091  
55  
56  
57  
58  
59  
60

88. Rahman MM, Arif MT, Safii R, Tambi Z, Akoi C, Jantan Z, Halim SA. Care seeking behaviour of Bangladeshi migrant workers in Sarawak, Malaysia. *Bangladesh Medical Research Council Bulletin*. 2019 Jun 15;45(1):47-53.
89. Siah PC, Low SK, Lee WY, Lim YY, Tan JT. Discrimination perceived by child refugees in Malaysia: from the views of representatives from refugees' community service centres and non-government service. *Vulnerable Children and Youth Studies*. 2019 Sep 1:1-4.
90. Sahimin N, Lim YA, Noordin R, Yunus MH, Arifin N, Behnke JM, Zain SN. Epidemiology and immunodiagnostics of *Strongyloides stercoralis* infections among migrant workers in Malaysia. *Asian Pacific Journal of Tropical Medicine*. 2019 Jun 1;12(6):250.
91. Chuah FL, Tan ST, Yeo J, Legido-Quigley H. Health system responses to the health needs of refugees and asylum-seekers in Malaysia: A qualitative study. *International Journal of Environmental Research and Public Health*. 2019 Jan;16(9):1584.
92. Vearey J, Orcutt M, Gostin L, Braham CA, Duigan P. Building alliances for the global governance of migration and health. *BMJ*. 2019 Sep 16;366:l4143.
93. Reidpath DD, Allotey P. Infant mortality rate as an indicator of population health. *Journal of Epidemiology & Community Health*. 2003 May 1;57(5):344-6.

## References

- 1  
2  
3  
4 1092  
5  
6 1093 94. Vijayasingham L, Rhule E, Asgari-Jirhandeh N, Allotey P. Restrictive migration  
7  
8 1094 policies in low-income and middle-income countries. *The Lancet Global Health*. 2019  
9  
10 1095 Jul 1;7(7):e843-4.  
11  
12  
13 1096  
14  
15 1097 95. Juárez SP, Honkaniemi H, Dunlavy AC, Aldridge RW, Barreto ML, Katikireddi SV,  
16  
17 1098 Rostila M. Effects of non-health-targeted policies on migrant health: A systematic  
18  
19 1099 review and meta-analysis. *The Lancet Global Health*. 2019 Apr 1;7(4):e420-35.  
20  
21  
22 1100  
23  
24 1101 96. Shao C, Meng X, Cui S, Wang J, Li C. Income-related health inequality of migrant  
25  
26 1102 workers in China and its decomposition: An analysis based on the 2012 China labor-  
27  
28 1103 force dynamics survey data. *Journal of the Chinese Medical Association*. 2016 Oct  
29  
30 1104 1;79(10):531-7.  
31  
32  
33 1105  
34  
35 1106 97. He X, Wong DF. A comparison of female migrant workers' mental health in four  
36  
37 1107 cities in China. *International Journal of Social Psychiatry*. 2013 Mar;59(2):114-22.  
38  
39  
40 1108  
41  
42 1109 98. Al-Khatib IA, Ju'ba A, Kamal N, Hamed N, Hmeidan N, Massad S. Impact of  
43  
44 1110 housing conditions on the health of the people at al-Ama'ri refugee camp in the West  
45  
46 1111 Bank of Palestine. *International Journal of Environmental Health Research*. 2003 Dec  
47  
48 1112 1;13(4):315-26.  
49  
50  
51 1113  
52  
53 1114 99. Mutalip MH, Mishkin K, Paiwai F, Sulaiman J, Yoep N. Factors associated with  
54  
55 1115 sexual intercourse, condom-use, and perceived peer behaviors among adolescents in  
56  
57  
58  
59  
60

## References

- 1  
2  
3  
4 1116 Malaysia: A school-based cross-sectional study. *Malaysian Journal of Social Sciences*  
5  
6 1117 & Humanities. 2019 May 1;4(2):8-18.  
7  
8 1118  
9  
10 1119 100. Khan MA, Rosly NA, Majeed AB, Ismail NE. Knowledge of modes of HIV  
11  
12 1120 transmission among public secondary school students in urban and rural areas in  
13  
14 1121 Malaysia. *Pakistan Journal of Pharmaceutical Sciences*. 2018 Sep 1;31(5).  
15  
16 1122  
17  
18 1123 101. Shakir M, Mahavera S, Wong LP, Lim Abdullah K, Adam P. Online STI  
19  
20 1124 information seeking behaviour and condom use intentions among young Facebook  
21  
22 1125 users in Malaysia. *Health Promotion International*. 2019.  
23  
24 1126  
25  
26 1127 102. Renzaho AM, Burns C. Post-migration food habits of sub-Saharan African  
27  
28 1128 migrants in Victoria: A cross-sectional study. *Nutrition & Dietetics*. 2006  
29  
30 1129 Jun;63(2):91-102.  
31  
32 1130  
33  
34 1131 103. Ganle JK, Amoako D, Baatiema L, Ibrahim M. Risky sexual behaviour and  
35  
36 1132 contraceptive use in contexts of displacement: Insights from a cross-sectional survey  
37  
38 1133 of female adolescent refugees in Ghana. *International Journal for Equity in Health*.  
39  
40 1134 2019 Dec 1;18(1):127.  
41  
42 1135  
43  
44 1136 104. Bosdriesz JR, Lichthart N, Witvliet MI, Busschers WB, Stronks K, Kunst AE.  
45  
46 1137 Smoking prevalence among migrants in the US compared to the US-born and the  
47  
48 1138 population in countries of origin. *PloS One*. 2013;8(3).  
49  
50 1139  
51  
52  
53  
54  
55  
56  
57  
58  
59  
60

## References

- 1  
2  
3  
4 1140 105. Ritchie H, Roser M. Smoking. Oxford: Our World Data; 2019 [updated 2019  
5  
6 1141 Nov; cited 2019 Nov 20]. Available from: <https://ourworldindata.org/smoking>  
7  
8 1142  
9  
10 1143 106. World Health Organisation. Noncommunicable diseases (NCD) country  
11  
12 1144 profiles – Malaysia. (n.p.): World Health Organisation 2018.  
13  
14  
15 1145  
16  
17 1146 107. Zimmerman C, Hossain M, Watts C. Human trafficking and health: A  
18  
19 1147 conceptual model to inform policy, intervention and research. *Social Science &*  
20  
21 1148 *Medicine*. 2011 Jul 1;73(2):327-35.  
22  
23  
24 1149  
25  
26 1150 108. Zimmerman C, Kiss L, Hossain M. Migration and health: A framework for  
27  
28 1151 21st century policy-making. *PloS Medicine*. 2011 May;8(5).  
29  
30  
31 1152  
32  
33 1153 109. Par M, Hassan SA, Uba I, Baba M. Perceived stress among International  
34  
35 1154 postgraduate students in Malaysia. *International Journal of Psychological Studies*.  
36  
37 1155 2015 Dec 1;7(4):1.  
38  
39  
40 1156  
41  
42 1157 110. Kohno A, Farid ND, Musa G, Aziz NA, Nakayama T, Dahlui M. Factors  
43  
44 1158 affecting Japanese retirees' healthcare service utilisation in Malaysia: A qualitative  
45  
46 1159 study. *BMJ Open*. 2016 Mar 1;6(3).  
47  
48  
49 1160  
50  
51 1161 111. Asits S, Noorhidayah I, Osman A. Migrasi bermusim: Pengaruhnya terhadap  
52  
53 1162 kawalan malaria di Sabah. *Medical Journal of Malaysia*. 1999;54(2):200-209.  
54  
55  
56 1163  
57  
58  
59  
60

References

1  
2  
3  
4  
5  
6  
7  
8  
9  
10  
11  
12  
13  
14  
15  
16  
17  
18  
19  
20  
21  
22  
23  
24  
25  
26  
27  
28  
29  
30  
31  
32  
33  
34  
35  
36  
37  
38  
39  
40  
41  
42  
43  
44  
45  
46  
47  
48  
49  
50  
51  
52  
53  
54  
55  
56  
57  
58  
59  
60

1164 112. World Health Organization. A conceptual framework for action on the social  
1165 determinants of health. Geneva: World Health Organization 2010.

For peer review only

## References

**Box**

## Box 1. Main recommendations to improve future research on migrant health.

- Improve the description of the target migrant population by including information regarding the type of migrant (e.g. foreign worker, refugee), visa status (e.g. regular, irregular), country of origin, socioeconomic variables (e.g. level of education, income), mode of transport during migration journey (e.g. boat, car), and the existence of forced entry (e.g. human trafficking, forced marriage).
- Create associations between different stages of migration (pre-departure, travel, destination, interception, and return phase) and health outcomes.
- More research output concerning governance and institutional inequities and mortality and morbidity, and, consequently, conduct a time series analysis between these two dimensions to identify any possible relationships.
- More research output regarding non-communicable diseases, especially on the main causes of death in Malaysia; cardiovascular diseases, chronic respiratory diseases, and diabetes.
- More research output concerning several subdimensions of risk behaviour, especially on smoking, physical inactivity, and alcohol abuse.
- Evaluate the impact of health and non-health policies on migrant health.
- Explore living conditions regarding the physical environment, such as housing and environmental conditions, and the impact on migrant health outcomes.
- Promotion of guidelines on study conduct and reporting among researchers.



## Figure Legends

1166 **Tables**

1167 Table 1. Definitions of included study designs.

| Study design                      | Definition                                                                                                                                                                                                                                                                                                               |
|-----------------------------------|--------------------------------------------------------------------------------------------------------------------------------------------------------------------------------------------------------------------------------------------------------------------------------------------------------------------------|
| <b>Analytical studies</b>         | Studies that strive to quantify the relationship between a particular exposure or intervention and the outcome of interest, where these studies include a comparison group to compare the outcome rates. <sup>18</sup>                                                                                                   |
| Systematic review                 | A study that is conducted systematically to collect all published evidence – that comply with the specified inclusion criteria – and provide a summary of the results to answer a specific research question. <sup>19</sup>                                                                                              |
| Randomised controlled trial (RCT) | An experimental study that includes at least two groups – treatment group and control group – to compare the outcomes between the group that received the intervention/drug and the group that received a placebo/no treatment. The participants of the group are randomly allocated to one of the groups. <sup>20</sup> |
| Quasi-experimental study/non-RCT  | An experimental study that includes at least two groups – treatment group and control group – to compare the outcomes between the group that received the intervention/drug and the group that received a placebo. The participants of the group are <b>not</b> randomly allocated to one of the groups. <sup>21</sup>   |
| Cohort study                      | A study that follows a group of people over time, where the participants are sampled based on the presence or absence of a particular exposure to compare the outcome of interest with a control group. <sup>20</sup>                                                                                                    |
| Case-control study                | A study that includes a group of people selected on the outcome of interest (cases) and a group without the outcome of interest (controls), followed by assessing previous exposure of both groups to determine if there is a relationship between the level of exposure and outcome of interest. <sup>20</sup>          |
| Analytical cross-sectional        | A study that looks at two groups – exposed and unexposed – and the outcome of interest at a particular point or period of time to compare the differences between the two groups. <sup>20</sup>                                                                                                                          |
| <b>Descriptive studies</b>        | Studies that do not strive to quantify a relationship between variables, but simply describe the disease outcome and characteristics within a defined population. Note that descriptive studies can still include analytic components. <sup>18</sup>                                                                     |
| Prevalence study                  | A study that looks at a population at a particular point or period of time to describe the prevalence of an outcome of interest. <sup>20</sup>                                                                                                                                                                           |
| Case series                       | A study where only subjects are included with a particular outcome of interest to describe the shared and diverging characteristics of this study population. <sup>22</sup>                                                                                                                                              |
| Case report                       | A study that describes an unfamiliar or extraordinary outcome of one individual. <sup>22</sup>                                                                                                                                                                                                                           |

1168

## Tables

1169 Table 2. Level of evidence for each study design.

| Research design                                               | Level of evidence | Abbreviation |
|---------------------------------------------------------------|-------------------|--------------|
| <b><i>Descriptive research</i></b>                            |                   |              |
| Systematic review of descriptive studies                      | 1                 | Des-1        |
| Prevalence study with analytical component                    | 2                 | Des-2        |
| Case series and prevalence study without analytical component | 3                 | Des-3        |
| Case report                                                   | 4                 | Des-4        |
| <b><i>Experimental research</i></b>                           |                   |              |
| Systematic review/meta-analysis of experimental studies       | 1                 | Exp-1        |
| Randomised controlled trial                                   | 2                 | Exp-2        |
| Group quasi-experimental study (a.k.a. non-RCT)               | 3                 | Exp-3        |
| Quasi-experimental study with single subject                  | 4                 | Exp-4        |
| <b><i>Observational research</i></b>                          |                   |              |
| Systematic review/meta-analysis of observational studies      | 1                 | Obs-1        |
| Cohort study                                                  | 2                 | Obs-2        |
| Case-control                                                  | 3                 | Obs-3        |
| Analytical cross-sectional study                              | 4                 | Obs-4        |
| <b><i>Qualitative research</i></b>                            |                   |              |
| Systematic review/meta-synthesis of qualitative studies       | 1                 | Qual-1       |
| Group qualitative studies with more rigor <sup>1</sup>        | 2                 | Qual-2       |
| Group qualitative studies with less rigor                     | 3                 | Qual-3       |
| Qualitative study with a single informant                     | 4                 | Qual-4       |

1170 1 = Highest level of evidence; 4 = lowest level of evidence. Modifications have been made in the terminology to make this  
 1171 model more align with the included research designs in this study and are shown in the footnote below.<sup>2</sup>

<sup>1</sup> Rigor was subjectively assessed and based on the number of included participants, amount of collected data, and detailed explanation how the study was conducted.

<sup>2</sup> The following terminology of Tomlin & Borgetto's (2011) have been modified: association/correlation studies = prevalence studies with analytical component; normative/descriptive studies = prevalence studies without analytical component; individual case studies = case report; controlled-clinical trials = group quasi- experimental study; single-subject studies = quasi-experimental study with single subject; pre-existing groups comparisons with covariate analysis = cohort study; one-group pre-post studies = analytical cross-sectional study.

## Tables

Table 3. Summary table of included articles.

| Reference                     | Study design                       | Study period        | Type of migrant                    | Sample population                                                            | Main category     | Subcategory                                  | Quality score   | Summary                                                                                                                                                                                                                                                                                                                                                                              |
|-------------------------------|------------------------------------|---------------------|------------------------------------|------------------------------------------------------------------------------|-------------------|----------------------------------------------|-----------------|--------------------------------------------------------------------------------------------------------------------------------------------------------------------------------------------------------------------------------------------------------------------------------------------------------------------------------------------------------------------------------------|
| Scheutz et al <sup>26</sup>   | Prevalence (Des-3)                 | January to May 1982 | Asylum seekers & refugees          | 361 Vietnamese refugees                                                      | Disease & injury  | Non-communicable disease (Oral health)       | Moderate (55.6) | Dental health of refugees was examined, and the study showed a positive relationship between the average number of tooth decay and missing teeth and increase in age among younger refugees.                                                                                                                                                                                         |
| Levy <sup>27</sup>            | Prevalence (Des-2)                 | July to August 1984 | Asylum seekers & refugees          | 297 children (94 Filipino, 104 Muruts, 99 Kadazan)                           | Disease & injury  | Communicable disease (Parasite)              | Low (44.4)      | Three groups of children – one refugee group and two indigenous groups – were examined for six types of intestinal parasites. Among the three groups, Filipino refugee children presented significant higher rates of <i>Trichuris trichiura</i> and <i>ascaris lumbricoides</i> compared to both groups.                                                                            |
| Kassim et al <sup>28</sup>    | Case series (Des-3)                | 1985 to 1986        | Unclassified migrants <sup>1</sup> | 86 children (7 migrants, <sup>2</sup> 34 Malays, 16 Chinese, 3 mixed origin) | Risk behaviour    | Violence & abuse (Neglect)                   | Moderate (60.0) | In total, 86 children were identified as cases suffering from different types of abuse. Among this group were 7 irregular migrant children, where they were identified as neglected, due to lacking nutritional and physical needs.                                                                                                                                                  |
| Zulkifli et al <sup>29</sup>  | Analytical cross-sectional (Obs-4) | N/A <sup>2</sup>    | Unclassified migrants              | 1,515 people (336 migrants, <sup>2</sup> 1,075 citizens)                     | Living conditions | Service environment (Healthcare utilisation) | Low (33.3)      | A comparison between migrants and locals regarding maternal and child health outcomes were studied. Migrant women had a lower usage of contraceptives and antenatal care, but used the services of traditional birth attendants more compared to local women. In addition, migrant women had statistically significantly higher rates regarding infant mortality compared to locals. |
| Rajeswari et al <sup>30</sup> | Prevalence (Des-3)                 | N/A <sup>2</sup>    | Foreign workers <sup>3</sup>       | 456 children (10 Indonesians, 357 Malays, 78 Orang Asli, 11 Indian)          | Disease & injury  | Communicable disease (Parasite)              | Low (22.2)      | School children were examined for different types of helminths and protozoa, and the study showed that children from migrant workers had the highest prevalence.                                                                                                                                                                                                                     |

## Tables

|                                 |                        |                                   |                                         |                                                                                                  |                          |                                                |                    |                                                                                                                                                                                                                                                                                                                                                                                                                                     |
|---------------------------------|------------------------|-----------------------------------|-----------------------------------------|--------------------------------------------------------------------------------------------------|--------------------------|------------------------------------------------|--------------------|-------------------------------------------------------------------------------------------------------------------------------------------------------------------------------------------------------------------------------------------------------------------------------------------------------------------------------------------------------------------------------------------------------------------------------------|
| Jeyakumar <sup>31</sup>         | Case series<br>(Des-3) | 10 May<br>1993 to 08<br>July 1993 | Unclassified<br>migrants <sup>1,4</sup> | 27 migrants<br>(23 Bangladeshi, 4<br>Indonesians)                                                | Risk<br>behaviour        | Poor nutrition<br>(Nutrition deficiency)       | Low<br>(40.0)      | Twenty-seven detained irregular migrants were sent to the hospital to treat ankle oedema, where they showed a positive response to thiamine treatment.                                                                                                                                                                                                                                                                              |
| Jamaiah et al <sup>32</sup>     | Case series<br>(Des-3) | 1983 to<br>1992                   | Unclassified<br>migrants <sup>1</sup>   | 134 people<br>(22 Indonesian, 22<br>Others, <sup>2,5</sup> 40 Chinese,<br>37 Malays, 13 Indians) | Disease &<br>injury      | Communicable<br>disease<br>(Parasite)          | Low<br>(40.0)      | A total of 134 malaria cases were admitted to University Hospital Kuala Lumpur between 1983 and 1992, including 22 irregular Indonesian migrants (16.4%) and 22 (16.4%) other foreigners (such as other irregular migrants from Bangladesh, India, and Thailand, as well as Vietnamese refugees. In addition, chloroquine-resistance was found in 9 irregular Indonesian migrants and 6 other foreigners.                           |
| Krahl &<br>Hashim <sup>33</sup> | Prevalence<br>(Des-3)  | January<br>1994 to<br>June 1996   | Foreign<br>workers <sup>6,7</sup>       | 39 people<br>(20 Indonesians, 16<br>Filipinos, 1 Bruneian, 1<br>Singaporean, 1 Thai)             | Disease &<br>Injury      | Mental health<br>(Psychiatric disorders)       | High<br>(77.8)     | Within a two-year period, 39 foreigners were admitted to the psychiatric wards of UHKL., including 30 migrant workers that suffered from a psychiatric disorder. Domestic workers represented with 23 cases the largest group among these foreign workers.                                                                                                                                                                          |
| Zabedah et<br>al <sup>34</sup>  | Prevalence<br>(Des-2)  | N/A <sup>2</sup>                  | Unclassified<br>migrants                | 37 people identified;<br>27 people included<br>(17 Filipinos, 10 locals)                         | Risk<br>behaviour        | Alcohol & other drugs<br>(Inhalant)            | Low<br>(22.2)      | Among the 37 suspected solvent abusers (glue sniffers) that were admitted to Bukit Padang Psychiatric Hospital, 27 children admitted using these inhalants. Almost two-third of the cases were Filipino immigrants.                                                                                                                                                                                                                 |
| Dony et al <sup>35</sup>        | Prevalence<br>(Des-3)  | N/A <sup>2</sup>                  | Unclassified<br>migrants                | 3,908 people<br>(943 foreigners, <sup>2</sup> 2,965<br>nationals)                                | Mortality &<br>Morbidity | Morbidity rates<br>(Tuberculosis &<br>leprosy) | Moderate<br>(62.5) | An epidemiological study aimed to present the tuberculosis and leprosy trends in Sabah. Since 1990, at least 24% of the annual tuberculosis cases were among Indonesian and Filipino migrants, where the annual rate differed between 100 to 200 cases per 100,000 population between 1990 and 2000. Furthermore, leprosy rates among migrants differed from 4.39 cases to 6.19 cases per 100,000 population between 1996 and 2001. |

## Tables

|                                 |                     |                                    |                       |                                                                                                                    |                  |                                     |             |                                                                                                                                                                                                                                                                                                                  |
|---------------------------------|---------------------|------------------------------------|-----------------------|--------------------------------------------------------------------------------------------------------------------|------------------|-------------------------------------|-------------|------------------------------------------------------------------------------------------------------------------------------------------------------------------------------------------------------------------------------------------------------------------------------------------------------------------|
| Chandran et al <sup>36</sup>    | Case report (Des-4) | N/A <sup>2</sup>                   | Foreign workers       | 1 Myanmar                                                                                                          | Disease & injury | Communicable disease (Parasite)     | High (83.3) | A Jabouley procedure was carried out to treat a 30-year-old Myanmar worker that suffered from a filarial infection. After the procedure, the patient was discharged, but did not show for the follow-up.                                                                                                         |
| Nissapatorn et al <sup>37</sup> | Prevalence (Des-3)  | January 2000 to April 2004         | Foreign workers       | 1,885 patients <sup>2</sup>                                                                                        | Disease & injury | Communicable disease (Parasite)     | Low (50.0)  | Within a four-year period, 1,885 medical records of the University of Malaya Medical Centre were reviewed to identify the prevalence of four common protozoan infections. In total, 28 malaria cases were identified, where 60.7% was among foreigners. The majority of this group consisted of foreign workers. |
| Sobri et al <sup>38</sup>       | Case series (Des-3) | January 1995 to December 2001      | Unclassified migrants | 42 people (7 Indonesians, 1 Burmese, 1 Siamese (Thai), 1 Bangladeshi, 1 Nepalese, 23 Malays, 6 Chinese, 2 Indians) | Disease & injury | Communicable disease (Bacteria)     | Low (50.0)  | In total, 42 patients were diagnosed with tuberculosis meningitis at the Kuala Lumpur Hospital during a 7-year period. Eleven (9.5%) out of the 42 tuberculosis meningitis patients were among immigrants.                                                                                                       |
| Leong <sup>39</sup>             | Prevalence (Des-3)  | 1 January 1997 to 31 December 2004 | Foreign workers       | 3,117 Indonesians                                                                                                  | Disease & injury | Various diseases (various diseases) | Low (44.4)  | During an 8-year-period, 3,117 female migrant (domestic) workers were screened at a private clinic in Johor Bahru, where 223 (7.2%) of them presented medical problems. Hypertension, pulmonary tuberculosis and hepatitis B were the top three major issues.                                                    |
| Sasidharan et al <sup>40</sup>  | Prevalence (Des-2)  | June 1999 to September 2001        | Foreign workers       | 697 people (26 Bangladeshi, 276 Malays, 229 Chinese, 166 Indians)                                                  | Disease & injury | Communicable disease (Bacteria)     | High (77.8) | From 1999 to 2002, a total of 697 patients were examined for Helicobacter pylori infection. Twenty-six Bangladeshi foreign workers were among this group, and the infection was present in 6 of them.                                                                                                            |
| Masitah et al <sup>41</sup>     | Case series (Des-3) | N/A <sup>2</sup>                   | Foreign workers       | N/A <sup>2</sup>                                                                                                   | Disease & injury | Communicable disease (Parasite)     | Low (22.2)  | During a 6-year period, different malaria registries were reviewed to identify the number of cases in Selangor. The number of annual malaria cases decreased from 172 people in 2001 to 90 people in 2006, while the proportion                                                                                  |

## Tables

|                                       |                                    |                  |                              |                                                                                                                                                                            |                  |                                 |             |                                                                                                                                                                                                                                                                                                                                                                                                                 |
|---------------------------------------|------------------------------------|------------------|------------------------------|----------------------------------------------------------------------------------------------------------------------------------------------------------------------------|------------------|---------------------------------|-------------|-----------------------------------------------------------------------------------------------------------------------------------------------------------------------------------------------------------------------------------------------------------------------------------------------------------------------------------------------------------------------------------------------------------------|
|                                       |                                    |                  |                              |                                                                                                                                                                            |                  |                                 |             | of cases among migrant workers increased from 57% to 75%, respectively.                                                                                                                                                                                                                                                                                                                                         |
| Shailendra & Prepageran <sup>42</sup> | Case report (Des-4)                | N/A <sup>2</sup> | Foreign workers              | 1 Myanmar                                                                                                                                                                  | Disease & injury | Communicable disease (Parasite) | High (75.0) | A 38-year-old Myanmar migrant worker presented a case of oropharyngeal rhinosporidiosis. The abnormal growths were removed, and the patient did not show any recurrence of the disease after a 3-month follow-up.                                                                                                                                                                                               |
| Chan et al <sup>43</sup>              | Analytical cross-sectional (Obs-4) | N/A <sup>2</sup> | Foreign workers <sup>1</sup> | 699 people (336 Indonesians, 45 Bangladeshi, 45 Indians, 26 Nepalese, 22 Myanmar, 17 Pakistani, 3 Africans, <sup>2</sup> 3 Sri Lankans, 3 Thai, 1 Chinese, 198 Malaysians) | Disease & injury | Communicable disease (Parasite) | Low (0.0)   | A sample of 699 people were screened for toxoplasmosis, including 501 migrant workers. Among the migrant workers, 171 (34.1%) cases tested positive for the IgG antibodies test and 26 (5.2%) cases tested positive for the IgM antibodies test. The statistical analysis showed that the infection rate – using the IgG test – was significantly higher among local residents compared to the foreign workers. |
| Farhana et al <sup>44</sup>           | Case series (Des-3)                | 1999 to 2008     | Foreign workers              | 34 people (3 Myanmar, 1 Indonesian, 1 Pakistani, 14 Chinese, 9 Malays, 6 Indians)                                                                                          | Disease & injury | Communicable disease (Parasite) | Low (60.0)  | A total of 34 amoebiasis cases were admitted to University Malaya Medical Centre during a 10-year-period, including five foreign workers.                                                                                                                                                                                                                                                                       |
| Chan et al <sup>45</sup>              | Analytical cross-sectional (Obs-4) | N/A <sup>2</sup> | Foreign workers <sup>1</sup> | 699 people (336 Indonesians, 45 Bangladeshi, 45 Indians, 26 Nepalese, 22 Myanmar, 17 Pakistani, 3 Africans, <sup>2</sup> 3 Sri Lankans, 3 Thai, 1 Chinese, 198 Malaysians) | Disease & injury | Communicable disease (Parasite) | Low (0.0)   | A sample of 699 people were screened for toxoplasmosis, including 501 migrant workers. Among the migrant workers, 171 (34.1%) cases tested positive for the IgG antibodies test and 26 (5.2%) cases tested positive for the IgM antibodies test. The statistical analysis showed that the infection rate – using the IgG test – was significantly higher among local residents compared to the foreign workers. |

## Tables

|                                    |                                              |                                       |                          |                                                                                                                                        |                     |                                         |                    |                                                                                                                                                                                                                                                                                                                                                                                                               |
|------------------------------------|----------------------------------------------|---------------------------------------|--------------------------|----------------------------------------------------------------------------------------------------------------------------------------|---------------------|-----------------------------------------|--------------------|---------------------------------------------------------------------------------------------------------------------------------------------------------------------------------------------------------------------------------------------------------------------------------------------------------------------------------------------------------------------------------------------------------------|
| Murty <sup>46</sup>                | Case report<br>(Des-4)                       | N/A <sup>2</sup>                      | Foreign workers          | 1 Myanmar                                                                                                                              | Disease &<br>injury | Non-communicable<br>disease<br>(Benign) | High<br>(80.0)     | A 37-year-old foreign worker was found dead, and the post-mortem examination showed that the case suffered from a cystic tumour in the heart.                                                                                                                                                                                                                                                                 |
| Murty et al <sup>47</sup>          | Case series<br>(Des-3)                       | 1996 to<br>2005                       | Foreign workers          | 27 people<br>(16 Indonesians, 1<br>Bangladeshi, 1<br>Punjabi, <sup>2</sup> 1 Bajau, <sup>2</sup> 5<br>Malays, 2 Indians, 1<br>Chinese) | Disease &<br>injury | Injury<br>(Physical trauma)             | Low<br>(44.4)      | During a 10-year study period, 27 cases of fatal lightning strikes were identified. The majority of the cases were among foreign workers, where Indonesians had with 16 people (59.3%) the highest prevalence.                                                                                                                                                                                                |
| Mustafa et al <sup>48</sup>        | Prevalence<br>(Des-2)                        | August<br>2006 to<br>March 2009       | Foreign workers          | 558 patients<br>(34 foreign labour; <sup>2</sup> 347<br>Malays; 97 Indians; 80<br>Chinese)                                             | Disease &<br>injury | Communicable<br>disease<br>(Virus)      | Low<br>(44.4)      | A total of 558 suspected dengue cases were identified, including 34 migrant workers. Among the foreign labour group, 20 patients presented acute dengue, 4 patients presented recent dengue, and 10 patients tested negative for dengue.                                                                                                                                                                      |
| Su et al <sup>49</sup>             | Analytical<br>cross-<br>sectional<br>(Obs-4) | 3 January<br>2007 to 24<br>April 2007 | Foreign workers          | 194 people <sup>8</sup><br>(95% Indonesians, 5%<br>Bangladeshi)                                                                        | Disease &<br>injury | Injury<br>(Physical syndrome)           | Moderate<br>(57.1) | During a 4-month cross-sectional study, 234 migrant workers were examined for level of occupational vibration exposure and health outcomes. In total, 18% of the migrant workers suffered from hand-arm vibration syndrome (HAVS). In addition, different HAVS-related symptoms were significantly higher among workers with high levels of exposure compared to migrant workers with low levels of exposure. |
| Daher et al <sup>50</sup>          | Prevalence<br>(Des-2)                        | September<br>2009 to<br>April 2010    | Unclassified<br>migrants | 253 Iraqi                                                                                                                              | Disease &<br>injury | Mental health<br>(Quality of life)      | High<br>(75.0)     | Health-related quality of life of 253 Iraqi migrants was examined, showing that their quality of life was moderate and statically significant higher levels were found among males and married people.                                                                                                                                                                                                        |
| Ratnasingam<br>et al <sup>51</sup> | Prevalence<br>(Des-2)                        | January<br>2010 to                    | Foreign workers          | 5,340 people<br>(1,348 Bangladeshi,<br>843 Myanmar, 743                                                                                | Disease &<br>injury | Injury<br>(Physical trauma)             | Low<br>(11.1)      | A total of 5,340 workers in the furniture industry were examined, where 59% of this population was foreign labour. Compared to local workers, migrant workers had                                                                                                                                                                                                                                             |

## Tables

|                                    |                         |                                      |                              |                                                                   |                      |                                                    |                |  |                                                                                                                                                                                                                                                                                                                                                                                               |
|------------------------------------|-------------------------|--------------------------------------|------------------------------|-------------------------------------------------------------------|----------------------|----------------------------------------------------|----------------|--|-----------------------------------------------------------------------------------------------------------------------------------------------------------------------------------------------------------------------------------------------------------------------------------------------------------------------------------------------------------------------------------------------|
|                                    |                         | November<br>2010                     |                              | <i>Nepalese, 217<br/>Indonesians, 2,190<br/>Malaysians)</i>       |                      |                                                    |                |  | less occupational accidents and a more positive work-oriented mentality.                                                                                                                                                                                                                                                                                                                      |
| Ab Rahman & Abdullah <sup>52</sup> | Case report<br>(Des-4)  | N/A <sup>2</sup>                     | Foreign workers              | <i>1 Nepalese</i>                                                 | Disease & injury     | Communicable disease<br>(Parasite)                 | High<br>(87.5) |  | A 24-year-old Nepalese migrant worker presented a long medical history of different symptoms, including fever, abdominal pain, and poor appetite. Clinical examination showed that the patient suffered from a visceral leishmaniasis and malaria co-infection, and he was treated with chloroquine and amphotericin B. A follow-up was carried out after 6 months and the man remained well. |
| Taib & Baba <sup>53</sup>          | Case series<br>(Des-3)  | 2006 to<br>2009                      | Foreign workers              | <i>75 patients<br/>(38 foreigners,<sup>8</sup> 37<br/>locals)</i> | Disease & injury     | Communicable disease<br>(Bacteria)                 | Low<br>(30.0)  |  | A total of 75 leprosy cases were detected at the Hospital Kuala Lumpur Hansen's Clinic during a 4-year period. With 38 patients, foreign workers represented more than half of the cases.                                                                                                                                                                                                     |
| Osman et al <sup>54</sup>          | Prevalence<br>(Des-3)   | June 2012<br>to<br>September<br>2012 | Unclassified<br>migrants     | <i>108 Iraqi</i>                                                  | Risk<br>behaviour    | Sexual behaviour<br>(HPV knowledge)                | Low<br>(50.0)  |  | Knowledge and awareness regarding cervical cancer and pap smear tests were assessed among 108 Iraqi migrant women. In general, this population lacks understanding regarding cervical cancer and the importance of pap smear tests.                                                                                                                                                           |
| Minhat et al <sup>55</sup>         | Prevalence<br>(Des-2)   | April 2010<br>to June<br>2010        | Unclassified<br>migrants     | <i>271 Iranians</i>                                               | Risk<br>behaviour    | Sexual behaviour<br>(HPV knowledge)                | Low<br>(25.0)  |  | The knowledge regarding HPV vaccination of 271 Iranian female migrants was evaluated and showed that the majority of the study population has poor knowledge regarding this matter. Marital status was the only predicative factor that was statistically significant, where married women were 3.6 times more likely to have good HPV knowledge.                                             |
| Mendelsohn et al <sup>56</sup>     | Qualitative<br>(Qual-2) | July 2010 to<br>September<br>2010    | Asylum seekers<br>& refugees | <i>14 Myanmar<sup>9</sup></i>                                     | Living<br>conditions | Service environment<br>(Healthcare<br>utilisation) | High<br>(90.0) |  | Fourteen Myanmar refugees were interviewed to explore the difficulties that this group has in accessing anti-retroviral therapy (ART). Barriers to comply to ART                                                                                                                                                                                                                              |



## Tables

|                                |                                    |                            |                           |                                                                                                                        |                   |                                              |                 |  |                                                                                                                                                                                                                                                                                                                                         |
|--------------------------------|------------------------------------|----------------------------|---------------------------|------------------------------------------------------------------------------------------------------------------------|-------------------|----------------------------------------------|-----------------|--|-----------------------------------------------------------------------------------------------------------------------------------------------------------------------------------------------------------------------------------------------------------------------------------------------------------------------------------------|
|                                |                                    |                            |                           |                                                                                                                        |                   |                                              |                 |  | include lack of an UNHCR identity card, fear of arrest during travelling to the hospital, corruption, financial issues, and receiving small quantities of ART medication per refill.                                                                                                                                                    |
| Mendelsohn et al <sup>57</sup> | Analytical cross-sectional (Obs-4) | April 2010 to July 2010    | Asylum seekers & refugees | 299 people (146 Myanmar, 5 Others, <sup>2</sup> 148 Malaysians)                                                        | Living conditions | Service environment (Healthcare utilisation) | High (83.3)     |  | ART compliance and virological outcomes were compared between HIV-infected refugees and locals, where the study showed that both groups had similar rates of compliance and unsuppressed viral loads.                                                                                                                                   |
| Kwan et al <sup>58</sup>       | Case series (Des-3)                | 2008 to 2013               | Unclassified migrants     | 27 people (3 Indonesians, 2 Indians, 2 Nepalese, 2 Myanmar, 1 Sri Lankan, 17 Malaysians)                               | Disease & injury  | Communicable disease (Bacteria)              | Low (40.0)      |  | Between 2008 and 2013, 27 leprosy cases were identified by reviewing the Dermatology Clinic census. Out of the 27 identified leprosy cases, 37% of them were among immigrants.                                                                                                                                                          |
| Santos et al <sup>59</sup>     | Prevalence (Des-3)                 | February 2013 to June 2013 | Foreign workers           | 317 people (110 Sri Lankans, 85 Indonesians, 71 Indians, <sup>8</sup> 22 Nepalese, 20 Indians, <sup>8</sup> 9 Myanmar) | Disease & injury  | Injury (Physical syndrome)                   | Moderate (55.6) |  | A sample of 317 migrant workers were examined to explore the prevalence of musculoskeletal pain among this group. Almost two-third (203 people) of the surveyed migrant workers suffered from work-related musculoskeletal complaints. Pain in the knee/leg/foot area was the most common, as 85 migrant workers reported this outcome. |
| Razali et al <sup>60</sup>     | Case series (Des-3)                | 2000 to 2012               | Unclassified migrants     | 18 females (2 Indonesians, 1 Myanmar, 6 Malays, 5 Chinese, 3 Indians, 1 Punjabi)                                       | Risk behaviour    | Violence & abuse (Murder)                    | High (80.0)     |  | Clinical records of two forensic psychiatric institutions were reviewed during 2000 and 2012. A total of 18 cases that committed maternal filicide were detected, including 3 immigrant women that suffered from adverse life events.                                                                                                   |
| Elmi et al <sup>61</sup>       | Case control (Obs-3)               | January 2010 to April 2014 | Unclassified migrants     | 209 cases (49 migrants, <sup>2</sup> 265 locals)                                                                       | Disease & injury  | Communicable disease (Bacteria)              | Low (50.0)      |  | A case control study was conducted to identify risk factors regarding multidrug-resistant tuberculosis (MDR-TB) development. The study showed that MDR-TB was more prevalent than non-MDR-TB among foreign patients, and                                                                                                                |

## Tables

|                             |                                    |                            |                           |                                                                                                                        |                          |                                                    |             |                                                                                                                                                                                                                                                                                                               |
|-----------------------------|------------------------------------|----------------------------|---------------------------|------------------------------------------------------------------------------------------------------------------------|--------------------------|----------------------------------------------------|-------------|---------------------------------------------------------------------------------------------------------------------------------------------------------------------------------------------------------------------------------------------------------------------------------------------------------------|
|                             |                                    |                            |                           |                                                                                                                        |                          |                                                    |             | that MDR-TB was significantly higher among migrants compared to locals.                                                                                                                                                                                                                                       |
| Santos et al <sup>62</sup>  | Prevalence (Des-2)                 | March 2013 to April 2013   | Foreign workers           | 317 people (110 Sri Lankans, 85 Indonesians, 71 Indians, <sup>8</sup> 22 Nepalese, 20 Indians, <sup>8</sup> 9 Myanmar) | Living conditions        | Economic & work environment (Occupational hazards) | Low (44.4)  | The study assessed overall levels of pain and identified perceived environmental hazards among a group of foreign workers. In total, 204 out of 317 migrant workers suffered from musculoskeletal pain, and noise (37.5%) and dust (37.2%) were perceived as the main environmental hazards among this group. |
| William et al <sup>63</sup> | Prevalence (Des-2)                 | 4 July 2012 to 3 July 2014 | Unclassified migrants     | 176 people (53 Filipinos, 6 Indonesians, 106 Indigenous, 10 Chinese, 1 Indian)                                         | Disease & injury         | Communicable disease (Bacteria & Virus)            | High (77.8) | During a 2-year study, 176 participants that tested positive for pulmonary tuberculosis at the Luyang Clinic in Kota Kinabalu were enrolled in the study. More than one-third of the patients (33.5%) were migrants. In addition, out of the three patients with a HIV co-infection, one was a migrant.       |
| Siah et al <sup>64</sup>    | Prevalence (Des-2)                 | N/A <sup>2</sup>           | Asylum seekers & refugees | 89 children (39.3% Myanmar, 21.3% Somali, 22.5% Sudanese, 16.9% Others <sup>2</sup> )                                  | Disease & injury         | Mental health (Quality of life)                    | Low (11.1)  | A total of 89 refugee children were surveyed to investigate factors that influence their quality of life. Experiencing deportation, lower levels of education and unemployment of their fathers were significantly associated with a lower quality of life.                                                   |
| Guinto et al <sup>65</sup>  | Scoping review <sup>10</sup>       | 2000 to 2014               | Foreign workers           | N/A                                                                                                                    | Institutional inequities | Laws & regulations (Universal Health Coverage)     | N/A         | The study presented implementation challenges of universal health coverage (UHC) in Southeast Asian countries. Malaysia implemented some measures regarding healthcare for migrant workers, however, government-run UHC is still lacking.                                                                     |
| Vijian et al <sup>66</sup>  | Analytical cross-sectional (Obs-4) | 2010 to 2015               | Foreign workers           | 50 people (8 Bangladeshi, 6 Nepalese, 3 Myanmar, 1 African, <sup>2,11</sup> 1 Pakistani,                               | Disease & injury         | Non-communicable disease (Perforation)             | Low (16.7)  | Twenty foreign workers and 30 local patients that suffered from perforated peptic ulcers were compared to each other to assess the difference in characteristics between these two groups. Several characteristics were                                                                                       |

Tables

|                               |                                    |                               |                 |                                                                                                                          |                                                        |                                                |                 |  |                                                                                                                                                                                                                                                                                                                                                                                       |
|-------------------------------|------------------------------------|-------------------------------|-----------------|--------------------------------------------------------------------------------------------------------------------------|--------------------------------------------------------|------------------------------------------------|-----------------|--|---------------------------------------------------------------------------------------------------------------------------------------------------------------------------------------------------------------------------------------------------------------------------------------------------------------------------------------------------------------------------------------|
|                               |                                    |                               |                 |                                                                                                                          | <i>1 Vietnamese, 14 Malays, 12 Chinese, 4 Indians)</i> |                                                |                 |  | significantly different, where foreign workers were on average 18 years younger (mean age = 30.4), suffered from smaller-sized ulcers, and experienced lower levels of post-operative complications.                                                                                                                                                                                  |
| Azian et al <sup>67</sup>     | Prevalence (Des-2)                 | N/A <sup>2</sup>              | Foreign workers | 2,153 samples <sup>12</sup><br>(1,422 Bangladeshi, 349 Indians, 201 Nepalese, 78 Indonesians, 58 Vietnamese, 45 Myanmar) | Disease & injury                                       | Communicable disease (Parasite)                | Low (11.1)      |  | A total of 2,153 blood samples were taken from migrant workers that were located in seven states of Peninsular Malaysia and were tested for leishmaniasis infection. More than half (55.3%) of the collected blood samples were found positive.                                                                                                                                       |
| Sahimin et al <sup>68</sup>   | Prevalence (Des-2)                 | September 2014 to August 2015 | Foreign workers | 388 people<br>(167 Indonesians, 81 Nepalese, 70 Bangladeshi, 47 Indians, 23 Myanmar)                                     | Disease & injury                                       | Communicable disease (Parasite)                | Low (33.3)      |  | A cross-sectional study was conducted to examine the prevalence of different intestinal parasitic infections among foreign labour. Out of the 388 migrant workers, infection rates were between 52.1% and 84%. Higher infection rates significantly associated with migrants from Nepal and India, recently arrived in the country, and less than 1-year work experience in Malaysia. |
| Noh et al <sup>69</sup>       | Prevalence (Des-2)                 | N/A <sup>2</sup>              | Foreign workers | 600 foreign workers <sup>2</sup>                                                                                         | Living conditions                                      | Service environment (Healthcare utilisation)   | Low (22.2)      |  | Data of 600 foreign workers was obtained to explore their healthcare utilisation. Most of them utilise health services occasionally (88.5%) and the majority (61.4%) goes to government hospitals.                                                                                                                                                                                    |
| Kamaludin & How <sup>70</sup> | Analytical cross-sectional (Obs-4) | February 2016 to April 2016   | Foreign workers | 120 people <sup>2</sup><br>(60 foreign workers, 60 local workers)                                                        | Risk behaviour                                         | Hazard & safety awareness (environmental risk) | Low (50.0)      |  | The study compared environmental health awareness between 60 local workers and 60 migrant workers, where the latter group showed significant lower levels of awareness.                                                                                                                                                                                                               |
| Min et al <sup>71</sup>       | Prevalence (Des-3)                 | January 2011 to               | Foreign workers | 440 people<br>(46 Indonesians, 37 Bangladeshi, 33                                                                        | Disease & injury                                       | Injury (Physical trauma)                       | Moderate (62.5) |  | Medical records of the Hospital Sultan Ismail in Johor Bahru were reviewed between January 2011 and December 2013 to describe the prevalence of work-                                                                                                                                                                                                                                 |

## Tables

|                                    |                                |                  |                              |                                                                                                                                                                                |                      |                                                    |               |  |                                                                                                                                                                                                                                                                                                                                                                                                                                                                |
|------------------------------------|--------------------------------|------------------|------------------------------|--------------------------------------------------------------------------------------------------------------------------------------------------------------------------------|----------------------|----------------------------------------------------|---------------|--|----------------------------------------------------------------------------------------------------------------------------------------------------------------------------------------------------------------------------------------------------------------------------------------------------------------------------------------------------------------------------------------------------------------------------------------------------------------|
|                                    |                                | December<br>2013 |                              | <i>Nepalese, 17 Myanmar,<br/>11 Pakistani, 8 Others,<sup>2</sup><br/>226 Malays, 32<br/>Chinese, 20 Others,<sup>2</sup> 10<br/>Indians)</i>                                    |                      |                                                    |               |  | related ocular traumas. More than one-third of the ocular injuries were among foreign workers and contributed to two-third of the open eye traumas.                                                                                                                                                                                                                                                                                                            |
| Woh et al <sup>72</sup>            | Prevalence<br>(Des-3)          | N/A <sup>2</sup> | Foreign workers              | <i>317 people<br/>(140 Indians, 80<br/>Nepalese, 36<br/>Indonesians, 29<br/>Bangladeshi, 18<br/>Myanmar, 7 Pakistani,<br/>4 Sri Lankans, 2<br/>Vietnamese, 1 Thai)</i>         | Disease &<br>injury  | Communicable<br>disease<br>(Bacteria)              | Low<br>(44.4) |  | A cross-sectional study was conducted among 317 migrant food handlers from Ipoh, Kuala Terengganu, and Shah Alam to assess the Salmonella prevalence of this group, resulting in nine (2.8%) people testing positive. Seven out of these 9 cases presented multidrug resistance towards trimethoprim-sulfamethoxazole (6 cases), streptomycin (7 cases), ampicillin (4 cases), chloramphenicol (4 cases), sulphonamides (6 cases), and tetracycline (7 cases). |
| Tanabe et al <sup>73</sup>         | Mixed-<br>method <sup>10</sup> | N/A <sup>2</sup> | Asylum seekers<br>& refugees | <i>Participants per<br/>method<sup>9</sup><br/>(422 Myanmar - survey;<br/>66 Myanmar - focus<br/>group; 6 people<sup>2</sup> -<br/>interviews; 4 facility<br/>assessments)</i> | Living<br>conditions | Service environment<br>(Healthcare<br>utilisation) | N/A           |  | A multiple-country study was conducted to explore barriers regarding family planning services among refugees, where the main challenges included lack of understanding and misinformation concerning contraceptives, language barriers, financial issues, detention concerns, and distance of service delivery points.                                                                                                                                         |
| Ratnalingam<br>et al <sup>74</sup> | Prevalence<br>(Des-2)          | N/A <sup>2</sup> | Foreign workers              | <i>207 patients<sup>2</sup></i>                                                                                                                                                | Disease &<br>injury  | Communicable<br>disease<br>(Bacteria)              | Low<br>(33.3) |  | A total of 207 patients from four different hospitals in Malaysia were enrolled in the study to describe the characteristics and risk factors of microbial keratitis. More than one-fourth of the cases were due to work-related traumas, where 34.2% of these cases were among male migrant workers.                                                                                                                                                          |
| Woh et al <sup>75</sup>            | Prevalence<br>(Des-2)          | N/A <sup>2</sup> | Foreign workers              | <i>383 swab samples<sup>12</sup></i>                                                                                                                                           | Risk<br>behaviour    | Hygiene & sanitation<br>(Food preparation)         | Low<br>(22.2) |  | A total of 383 hand swabs were obtained from migrant food handlers to investigate the prevalence of aerobic                                                                                                                                                                                                                                                                                                                                                    |

Tables

|                             |                                                  |                               |                 |                                                                                                          |                  |                                 |             |  |                                                                                                                                                                                                                                                                                                                                                                                                                                                         |
|-----------------------------|--------------------------------------------------|-------------------------------|-----------------|----------------------------------------------------------------------------------------------------------|------------------|---------------------------------|-------------|--|---------------------------------------------------------------------------------------------------------------------------------------------------------------------------------------------------------------------------------------------------------------------------------------------------------------------------------------------------------------------------------------------------------------------------------------------------------|
|                             |                                                  |                               |                 | <i>(Indians, Nepalese, Indonesians, Bangladeshi, Myanmar, Pakistani, Sri Lankans, Thai, Vietnamese)</i>  |                  |                                 |             |  | place counts (APC), <i>Staphylococcus aureus</i> , and <i>Escherichia coli</i> , resulting in 99.5%, 64.4%, and 20.8% testing positive, respectively. In general, levels of the first two exceeded the acceptable standard. Infection rates were significantly higher among food handles from India compared food handlers from Nepal. In addition, significant higher rates were found among cooks, followed by waiters, compared to managers.         |
| Noor & Shaker <sup>76</sup> | Analytical cross-sectional (Obs-4) <sup>13</sup> | N/A <sup>2</sup>              | Foreign workers | 119 Indonesians                                                                                          | Disease & injury | Mental health (Stress)          | High (85.7) |  | A sample of 119 migrant workers were examined to explore the relationship between psychological distress and workplace discrimination, and the effect of coping strategy on stress levels. The study showed that workplace discrimination increased levels of stress. In addition, problem-oriented coping strategies were related to lower stress levels, while the emotional and avoidance coping strategy was associated to higher levels of stress. |
| Noordin et al <sup>77</sup> | Prevalence (Des-3)                               | September 2014 to August 2015 | Foreign workers | 484 foreign labour (246 Indonesians, 103 Nepalese, 69 Bangladeshi, 51 Indians, 14 Myanmar, 1 Vietnamese) | Disease & injury | Communicable disease (Parasite) | Low (33.3)  |  | Lymphatic filariasis prevalence among foreign labour was determined by screening 484 migrant workers, showing that 6.8% and 2.1% suffered from bancroftian filariasis and brugian filariasis, respectively.                                                                                                                                                                                                                                             |
| Sahimin et al <sup>78</sup> | Prevalence (Des-2)                               | September 2014 to August 2015 | Foreign workers | 484 people (247 Indonesians, 99 Nepalese, 72 Bangladeshi, 52 Indians, 14 Myanmar)                        | Disease & injury | Communicable disease (Parasite) | Low (44.4)  |  | A total of 484 foreign workers were sampled to describe the prevalence of <i>Toxoplasma gondii</i> and factors related to higher infection rates. In total, 278 migrant workers (57.4%) tested positive for <i>T gondii</i> , where significant higher levels of infection were associated with Nepalese origin, newly arrived in Malaysia, and working in manufacturing.                                                                               |

## Tables

|                                |                                              |                                        |                                       |                                                                                               |                     |                                          |                    |                                                                                                                                                                                                                                                                                                                                                                                                                                                                                                              |    |
|--------------------------------|----------------------------------------------|----------------------------------------|---------------------------------------|-----------------------------------------------------------------------------------------------|---------------------|------------------------------------------|--------------------|--------------------------------------------------------------------------------------------------------------------------------------------------------------------------------------------------------------------------------------------------------------------------------------------------------------------------------------------------------------------------------------------------------------------------------------------------------------------------------------------------------------|----|
| 1                              | 2                                            | 3                                      | 4                                     | 5                                                                                             | 6                   | 7                                        | 8                  | 9                                                                                                                                                                                                                                                                                                                                                                                                                                                                                                            | 10 |
| 11                             | 12                                           | 13                                     | 14                                    | 15                                                                                            | 16                  | 17                                       | 18                 | 19                                                                                                                                                                                                                                                                                                                                                                                                                                                                                                           | 20 |
| 21                             | 22                                           | 23                                     | 24                                    | 25                                                                                            | 26                  | 27                                       | 28                 | 29                                                                                                                                                                                                                                                                                                                                                                                                                                                                                                           | 30 |
| 31                             | 32                                           | 33                                     | 34                                    | 35                                                                                            | 36                  | 37                                       | 38                 | 39                                                                                                                                                                                                                                                                                                                                                                                                                                                                                                           | 40 |
| 41                             | 42                                           | 43                                     | 44                                    | 45                                                                                            | 46                  |                                          |                    |                                                                                                                                                                                                                                                                                                                                                                                                                                                                                                              |    |
| Labao et al <sup>79</sup>      | Prevalence<br>(Des-3)                        | N/A <sup>2</sup>                       | Foreign workers                       | 60 Filipinos                                                                                  | Disease &<br>injury | Injury<br>(Physical syndrome)            | Moderate<br>(55.6) | A cross-sectional study was conducted to investigate which body regions were presenting the most work-related musculoskeletal complaints among migrant workers. The major affected areas included the shoulder (60%), lower back (60%), upper back (48.3%), and neck (45%) regions.                                                                                                                                                                                                                          |    |
| Shaw et al <sup>80</sup>       | Randomised<br>controlled<br>trial<br>(Exp-2) | N/A <sup>2</sup>                       | Asylum seekers<br>& refugees          | 39 Afghans                                                                                    | Disease &<br>injury | Mental health<br>(Stress)                | Low<br>(30.8)      | In order to assess the impact of cognitive behavioural therapy (CBT) on emotional distress, an 8-week intervention was conducted among 39 female refugees. As a result, the intervention significantly lowered levels of posttraumatic stress, anxiety, emotional distress, and depression.                                                                                                                                                                                                                  |    |
| Rahman et<br>al <sup>81</sup>  | Case control<br>(Obs-3)                      | N/A <sup>2</sup>                       | Unclassified<br>migrants <sup>4</sup> | 61 people<br>(52 Myanmar, 9<br>Others <sup>2</sup> )                                          | Risk<br>behaviour   | Poor nutrition<br>(Nutrition deficiency) | Moderate<br>(60.0) | A case control study was conducted to determine the factors that were related to bilateral leg swelling among detained irregular migrants. Out of the 226 inmates, 21 Myanmar were identified as cases and were compared to 41 controls from Myanmar, Indonesia, Nepal, and Vietnam. The study showed that the illness was caused due to a thiamine deficiency, as the patients lacked the consumption of meat. Intravenous and oral thiamine treatment was provided, and the patients responded well to it. |    |
| Sahimin et<br>al <sup>82</sup> | Prevalence<br>(Des-2)                        | September<br>2014 to<br>August<br>2015 | Foreign workers                       | 388 people<br>(167 Indonesians, 81<br>Nepalese, 70<br>Bangladeshi, 47<br>Indians, 23 Myanmar) | Disease &<br>injury | Communicable<br>disease<br>(Parasite)    | Low<br>(44.4)      | A sample of 388 foreign workers were examined to describe the prevalence of Giardia duodenalis and Cryptosporidium parvum, showing that 42 people (10.8%) and 12 people (3.1%) tested positive, respectively. Indonesian nationality, work in the manufacturing and service sector, and newly arrived in Malaysia were significantly associated with G.                                                                                                                                                      |    |

Tables

|                               |                                     |                             |                       |                                                                                                                   |                  |                                  |                 |  |                                                                                                                                                                                                                                                                                                                                                                                                                                                                                                        |
|-------------------------------|-------------------------------------|-----------------------------|-----------------------|-------------------------------------------------------------------------------------------------------------------|------------------|----------------------------------|-----------------|--|--------------------------------------------------------------------------------------------------------------------------------------------------------------------------------------------------------------------------------------------------------------------------------------------------------------------------------------------------------------------------------------------------------------------------------------------------------------------------------------------------------|
|                               |                                     |                             |                       |                                                                                                                   |                  |                                  |                 |  | duodenalis, while <i>C. parvum</i> was only significantly associated with employment in the food industry.                                                                                                                                                                                                                                                                                                                                                                                             |
| Nwabichie et al <sup>83</sup> | Prevalence (Des-2)                  | N/A <sup>2</sup>            | Unclassified migrants | 320 people <sup>2</sup> (50% Nigerians, 15% Ghanaians, 35% Others [from Sudan, Tanzania, Kenya and South Africa]) | Risk behaviour   | Sexual behaviour (HPV knowledge) | High (77.8)     |  | In total, 320 African female migrants were surveyed to investigate risk factors that are related to higher HPV risk behaviour. Only 27.2% of the sample obtained cervical cancer screening, where higher levels of screening were significantly associated with having knowledge regarding cervical cancer, being married, having a standard health care provider, and no perceived barriers when obtaining the check-up.                                                                              |
| Jeffree et al <sup>84</sup>   | Case control (Obs-3)                | N/A <sup>2</sup>            | Foreign workers       | 470 people <sup>2</sup>                                                                                           | Disease & injury | Communicable disease (Parasite)  | Moderate (60.0) |  | A case-control study was conducted to determine the risk factors related to a malaria outbreak, where rubber tappers – including one migrant worker – presented a higher infection rate.                                                                                                                                                                                                                                                                                                               |
| Zerguine et al <sup>85</sup>  | Analytical cross-sectional (Obs-4)  | June 2016 to September 2016 | Foreign workers       | 323 people (155 Bangladeshi, 126 Indonesians, 25 Pakistani, 11 Nepalese, 6 Chinese)                               | Disease & injury | Injury (Physical trauma)         | Moderate (57.1) |  | A total of 323 migrant workers were sampled to investigate the prevalence and causes of workplace injuries, and examine the relationship between these traumas and safety commitment variables. The study showed that 22.6% of the foreign workers suffered from a work-related injury, mostly due to falls from heights (31.5%), and that there was a significant association between various injuries and different safety commitment-related variables, such as safe equipment and safety training. |
| Ya'acob et al <sup>86</sup>   | Randomised controlled Trial (Exp-2) | N/A <sup>2</sup>            | Foreign workers       | 54 Indonesians                                                                                                    | Disease & injury | Injury (Physical syndrome)       | Low (38.5)      |  | A workplace intervention was conducted to assess the effect of Kiken Yochi training on musculoskeletal symptoms among foreign workers, where the study showed that the intervention significant decreased                                                                                                                                                                                                                                                                                              |

## Tables

|                                |                      |                             |                           |                                                    |                   |                                              |             |  |                                                                                                                                                                                                                                                                                                                                                                                                                                                                |
|--------------------------------|----------------------|-----------------------------|---------------------------|----------------------------------------------------|-------------------|----------------------------------------------|-------------|--|----------------------------------------------------------------------------------------------------------------------------------------------------------------------------------------------------------------------------------------------------------------------------------------------------------------------------------------------------------------------------------------------------------------------------------------------------------------|
|                                |                      |                             |                           |                                                    |                   |                                              |             |  | musculoskeletal symptoms in feet and ankle areas compared to the control group.                                                                                                                                                                                                                                                                                                                                                                                |
| Chuah et al <sup>10</sup>      | Qualitative (Qual-2) | July 2016 to November 2017  | Asylum seekers & refugees | 20 stakeholders <sup>14</sup>                      | Living conditions | Service environment (Healthcare utilisation) | High (80.0) |  | Twenty stakeholders were interviewed to explore the barriers that refugees and asylum seekers encounter during healthcare utilisation, showing that cultural competency, insufficient health literacy, healthcare expenses, and not being aware of their rights were the main challenges.                                                                                                                                                                      |
| Loganathan et al <sup>87</sup> | Qualitative (Qual-2) | July 2018 to September 2018 | Foreign workers           | 18 stakeholders <sup>14</sup>                      | Living conditions | Service environment (Healthcare utilisation) | High (80.0) |  | A qualitative study with 18 stakeholders demonstrated that migrant workers face several complications with respect to utilising healthcare, including financial issues, discrimination, lack of valid passports and work permits, cultural competency, and physical barriers.                                                                                                                                                                                  |
| Rahman et al <sup>88</sup>     | Prevalence (Des-3)   | N/A <sup>2</sup>            | Foreign workers           | 314 Bangladeshi                                    | Living conditions | Service environment (Healthcare utilisation) | Low (33.3)  |  | A group of 314 migrant workers were sampled to present the distribution of diseases and healthcare utilisation pattern. Fever and sprains were the most reported diseases among the group that suffered from an illness in the last two weeks, while fever and gastrointestinal diseases were the most prevalent among the group that suffered from an illness in the last month. In addition, the majority (approx. 60%) visited hospitals to seek treatment. |
| Siah et al <sup>89</sup>       | Qualitative (Qual-3) | N/A <sup>2</sup>            | Asylum seekers & refugees | 8 stakeholders (5 refugees, <sup>2</sup> 3 locals) | Living conditions | Social environment (Prejudice)               | Low (50.0)  |  | Eight people stakeholders were interviewed to explore the forms of discrimination that refugee children experience. The study shows that refugee children suffer from denied access to health care, not receiving proper education, and being judged by their social environment.                                                                                                                                                                              |



## Tables

|    |                           |             |              |                 |                               |            |                     |        |                                                           |
|----|---------------------------|-------------|--------------|-----------------|-------------------------------|------------|---------------------|--------|-----------------------------------------------------------|
| 1  |                           |             |              |                 |                               |            |                     |        |                                                           |
| 2  |                           |             |              |                 |                               |            |                     |        |                                                           |
| 3  |                           |             |              |                 |                               |            |                     |        |                                                           |
| 4  | Sahimin et                | Prevalence  | September    | Foreign workers | <i>610 people</i>             | Disease &  | Communicable        | Low    | Four different diagnostic tests were applied to identify  |
| 5  | al <sup>90</sup>          | (Des-2)     | 2014 and     |                 | <i>(246 Indonesians, 99</i>   | injury     | disease             | (33.3) | Strongyloides stercoralis among migrant workers, where    |
| 6  |                           |             | August       |                 | <i>Nepalese, 72</i>           |            | (Parasite)          |        | prevalence rates differed between 0.8% and 35.8%          |
| 7  |                           |             | 2015         |                 | <i>Bangladeshi, 52</i>        |            |                     |        |                                                           |
| 8  |                           |             |              |                 | <i>Indians, 14 Myanmar)</i>   |            |                     |        |                                                           |
| 9  |                           |             |              |                 |                               |            |                     |        |                                                           |
| 10 | Chuah et al <sup>91</sup> | Qualitative | July 2016 to | Asylum seekers  | 20 stakeholders <sup>14</sup> | Living     | Service environment | High   | Twenty stakeholders were interviewed to identify the      |
| 11 |                           | (Qual-2)    | January      | & refugees      |                               | conditions | (Healthcare         | (80.0) | challenges with respect to accessing healthcare among     |
| 12 |                           |             | 2018         |                 |                               |            | utilisation)        |        | refugees, showing that out of pocket healthcare spending, |
| 13 |                           |             |              |                 |                               |            |                     |        | language and cultural competency barriers, and access to  |
| 14 |                           |             |              |                 |                               |            |                     |        | medication are the top healthcare challenges.             |
| 15 |                           |             |              |                 |                               |            |                     |        |                                                           |
| 16 |                           |             |              |                 |                               |            |                     |        |                                                           |

\*Sample population in *italic* represents the migrant population;

\*\*The following abbreviations are used in the table: N/A = Data not available; HPV = Human Papilloma Virus

<sup>1</sup>Includes irregular migrants.

<sup>2</sup>Data to present detailed information is lacking.

<sup>3</sup>Includes children of migrant workers, which is according to the IOM (2011) definition still classified as migrant workers

<sup>4</sup>Includes detained migrants.

<sup>5</sup>Includes refugees, international students, expats, and unclassified migrants.

<sup>6</sup>Includes 3 expats; <sup>7</sup>Includes 6 transnational marriage migrants.

<sup>8</sup>Ambiguous reporting of the data.

<sup>9</sup>Includes a multiple-country study, and, therefore, subjects that were included in countries other than Malaysia are not reported in this table.

<sup>10</sup>Level of evidence and quality appraisal is not available for this study design.

<sup>11</sup>Includes an international student.

<sup>12</sup>Number of samples might not be similar to the number of study participants.

Tables

1  
2  
3  
4  
5  
6  
7  
8  
9  
10  
11  
12  
13  
14  
15  
16  
17  
18  
19  
20  
21  
22  
23  
24  
25  
26  
27  
28  
29  
30  
31  
32  
33  
34  
35  
36  
37  
38  
39  
40  
41  
42  
43  
44  
45  
46

<sup>13</sup>Despite of lacking a comparison group, this study was identified as an analytical cross-sectional study due to the aim – testing two hypotheses – and comprehensive statistical analysis.

<sup>14</sup>Representing the population of interest (as shown in the ‘type of migrant’ category).

For peer review only

## Tables

Table 4. Number and average quality of included articles disaggregated by type of migrant and BARHII dimensions.

| Category                                         | Number of studies per study design with level of evidence |      |      |      |      |      |      |      |      | Total # studies | Mean quality | References                                                           |
|--------------------------------------------------|-----------------------------------------------------------|------|------|------|------|------|------|------|------|-----------------|--------------|----------------------------------------------------------------------|
|                                                  | CR-4                                                      | AC-4 | QL-3 | CS-3 | PR-3 | CC-3 | QL-2 | PR-2 | RC-2 |                 |              |                                                                      |
| <i>Type of migrant</i>                           |                                                           |      |      |      |      |      |      |      |      |                 |              |                                                                      |
| Asylum seekers & refugees                        | -                                                         | 1    | 1    | -    | 1    | -    | 3    | 2    | 1    | 10 <sup>1</sup> | 58.4%        | 10 26 27 56 57 64 73 80 89 91                                        |
| Foreign workers                                  | 4                                                         | 7    | -    | 4    | 10   | 1    | 1    | 12   | 1    | 41 <sup>2</sup> | 45.7%        | 30 33 36 37 39-49 51-53 59 62 65-72 74-79 82 84-88 90                |
| Unclassified migrants                            | -                                                         | 1    | -    | 6    | 2    | 2    | -    | 5    | -    | 16              | 52.7%        | 28 29 31 32 34 35 38 50 54 55 58 60 61 63 81 83                      |
| <i>Dimension of BARHII framework</i>             |                                                           |      |      |      |      |      |      |      |      |                 |              |                                                                      |
| Institutional inequities                         | -                                                         | -    | -    | -    | -    | -    | -    | -    | -    | 1 <sup>2</sup>  | -            | 65                                                                   |
| Living conditions                                | -                                                         | 2    | 1    | -    | 1    | -    | 4    | 2    | -    | 11 <sup>1</sup> | 59.7%        | 10 29 56 57 62 69 73 87-89 91                                        |
| Risk behaviour                                   | -                                                         | 1    | -    | 3    | 1    | 1    | -    | 4    | -    | 10              | 48.7%        | 28 31 34 54 55 60 70 75 81 83                                        |
| Disease & injury                                 | 4                                                         | 6    | -    | 7    | 11   | 2    | -    | 14   | 2    | 46              | 46.3%        | 26 27 30 32 33 36-53 58 59 61-64 66-68 71 72 74 76-80 82 84-86 88 90 |
| Mortality & morbidity                            | -                                                         | 1    | -    | -    | 1    | -    | -    | -    | -    | 2               | 47.9%        | 29 35                                                                |
| <i>Subdimensions of institutional inequities</i> |                                                           |      |      |      |      |      |      |      |      |                 |              |                                                                      |
| Laws & regulations                               | -                                                         | -    | -    | -    | -    | -    | -    | -    | -    | 1 <sup>2</sup>  | -            | 65                                                                   |
| <i>Subdimensions of living conditions</i>        |                                                           |      |      |      |      |      |      |      |      |                 |              |                                                                      |
| Social environment                               | -                                                         | -    | 1    | -    | -    | -    | -    | -    | -    | 1               | 50.0%        | 89                                                                   |
| Economic and work environment                    | -                                                         | -    | -    | -    | -    | -    | -    | 1    | -    | 1               | 44.4%        | 62                                                                   |
| Service environment                              | -                                                         | 2    | -    | -    | 1    | -    | 4    | 1    | -    | 9 <sup>1</sup>  | 62.8%        | 10 29 56 57 69 73 87 88 91                                           |
| <i>Subdimensions of risk behaviour</i>           |                                                           |      |      |      |      |      |      |      |      |                 |              |                                                                      |
| Poor nutrition                                   | -                                                         | -    | -    | 1    | -    | 1    | -    | -    | -    | 2               | 50.0%        | 31 81                                                                |
| Violence & abuse                                 | -                                                         | -    | -    | 2    | -    | -    | -    | -    | -    | 2               | 70.0%        | 28 60                                                                |
| Alcohol & other drugs                            | -                                                         | -    | -    | -    | -    | -    | -    | 1    | -    | 1               | 22.2%        | 34                                                                   |
| Sexual behaviour                                 | -                                                         | -    | -    | -    | 1    | -    | -    | 2    | -    | 3               | 50.9%        | 54 55 83                                                             |
| Hygiene & sanitation                             | -                                                         | -    | -    | -    | -    | -    | -    | 1    | -    | 1               | 22.2%        | 75                                                                   |
| Hazard & safety awareness                        | -                                                         | 1    | -    | -    | -    | -    | -    | -    | -    | 1               | 50.0%        | 70                                                                   |
| <i>Subdimensions of disease &amp; injury</i>     |                                                           |      |      |      |      |      |      |      |      |                 |              |                                                                      |

## Tables

|                                                   |          |          |          |           |           |          |          |           |          |                         |              |                                                                   |
|---------------------------------------------------|----------|----------|----------|-----------|-----------|----------|----------|-----------|----------|-------------------------|--------------|-------------------------------------------------------------------|
| Communicable disease                              | 3        | 2        | -        | 6         | 4         | 2        | -        | 10        | -        | 27                      | 44.2%        | 27 30 32 36-38 40-45 48 52 53 58 61 63 67 68 72 74 77 78 82 84 90 |
| Non-communicable disease                          | 1        | 1        | -        | -         | 1         | -        | -        | -         | -        | 3                       | 50.8%        | 26 46 66                                                          |
| Injury                                            | -        | 2        | -        | 1         | 3         | -        | -        | 2         | 1        | 9                       | 47.4%        | 47 49 51 59 62 71 79 85 86                                        |
| Mental health                                     | -        | 1        | -        | -         | 1         | -        | -        | 2         | 1        | 5                       | 56.1%        | 33 50 64 76 80                                                    |
| Various diseases                                  | -        | -        | -        | -         | 2         | -        | -        | -         | -        | 2                       | 38.9%        | 39 88                                                             |
| <i>Subdimensions of mortality &amp; morbidity</i> |          |          |          |           |           |          |          |           |          |                         |              |                                                                   |
| Mortality rates                                   | -        | 1        | -        | -         | -         | -        | -        | -         | -        | 1                       | 33.3%        | 29                                                                |
| Morbidity rates                                   | -        | -        | -        | -         | 1         | -        | -        | -         | -        | 1                       | 62.5%        | 35                                                                |
| <b>Total</b>                                      | <b>4</b> | <b>9</b> | <b>1</b> | <b>10</b> | <b>13</b> | <b>3</b> | <b>4</b> | <b>19</b> | <b>2</b> | <b>67<sup>1,2</sup></b> | <b>49.2%</b> | 1-67                                                              |

\*Abbreviations for the type of study with the related level of evidence (the number after the dash) are used to describe the included studies: CR-4 = case report; AC-4 = analytical cross-sectional study; QL-3 = qualitative study with less rigour; CS-3 = case series; PR-3 = prevalence study without analytical component; CC-3 = case control; QL-2 = qualitative study with more rigour; PR-2 = prevalence study with analytical component; RC-2 = randomised controlled trial.

\*\*Level of evidence ranks from 1 to 4, where 1 is the highest level of evidence and 4 is the lowest level.

<sup>1</sup>Includes a mixed-method design, which was not appraised for level of evidence nor quality of the study;

<sup>2</sup>Includes a scoping review design, which was not appraised for level of evidence nor quality of the study.

## Tables

Table 5. Number and average quality of included articles disaggregated by research design category.

| Research design                                          | Level of evidence | Included studies      | Mean quality | References                                                                 |
|----------------------------------------------------------|-------------------|-----------------------|--------------|----------------------------------------------------------------------------|
| <i>Descriptive research</i>                              |                   |                       |              |                                                                            |
| Systematic review of descriptive studies                 | 1                 | -                     | -            | -                                                                          |
| Prevalence study with analytical component               | 2                 | 19                    | 39.7%        | 27 34 40 48 50 51 55 62-64 67-69 74 75 78 82 83 90                         |
| Case series                                              | 3                 | 10                    | 46.7%        | 28 31 32 38 41 44 47 53 58 60                                              |
| Prevalence study without analytical component            | 3                 | 13                    | 49.8%        | 26 30 33 35 37 39 54 59 71 72 77 79 88                                     |
| Case report                                              | 4                 | 4                     | 81.5%        | 36 42 46 52                                                                |
| Total                                                    |                   | 46                    | 47.7%        | 26-28 30-42 44 46-48 50-55 58-60 62-64 67-69 71 72 74 75 77-79 82 83 88 90 |
| <i>Experimental research</i>                             |                   |                       |              |                                                                            |
| Systematic review/meta-analysis of experimental studies  | 1                 | -                     | -            | -                                                                          |
| Randomised controlled trial                              | 2                 | 2                     | 34.7%        | 80 86                                                                      |
| Group quasi-experimental study (non-randomised)          | 3                 | -                     | -            | -                                                                          |
| Quasi-experimental study with single subject             | 4                 | -                     | -            | -                                                                          |
| Total                                                    |                   | 2                     | 34.7%        | 80 86                                                                      |
| <i>Observational research</i>                            |                   |                       |              |                                                                            |
| Systematic review/meta-analysis of observational studies | 1                 | -                     | -            | -                                                                          |
| Cohort study                                             | 2                 | -                     | -            | -                                                                          |
| Case-control                                             | 3                 | 3                     | 56.7%        | 61 81 84                                                                   |
| Analytical cross-sectional study                         | 4                 | 9                     | 42.6%        | 29 43 45 49 57 66 70 76 85                                                 |
| Total                                                    |                   | 12                    | 46.1%        | 29 43 45 49 57 61 66 70 76 81 84 85                                        |
| <i>Qualitative research</i>                              |                   |                       |              |                                                                            |
| Systematic review/meta-synthesis of qualitative studies  | 1                 | -                     | -            | -                                                                          |
| Group qualitative studies with more rigor                | 2                 | 4                     | 82.5%        | 10 56 87 91                                                                |
| Group qualitative studies with less rigor                | 3                 | 1                     | 50.0%        | 89                                                                         |
| Qualitative study with a single informant                | 4                 | -                     | -            | -                                                                          |
| Total                                                    |                   | 5                     | 76.0%        | 10 56 87 89 91                                                             |
| <b>Total</b>                                             |                   | <b>67<sup>1</sup></b> | <b>49.2%</b> | 1-67                                                                       |

Tables

1  
2  
3  
4  
5  
6  
7  
8  
9  
10  
11  
12  
13  
14  
15  
16  
17  
18  
19  
20  
21  
22  
23  
24  
25  
26  
27  
28  
29  
30  
31  
32  
33  
34  
35  
36  
37  
38  
39  
40  
41  
42  
43  
44  
45  
46

<sup>1</sup>Includes a mixed-method design and a scoping review, which were both not assessed for the level of evidence nor quality appraisal.

For peer review only

Tables

1  
2  
3  
4  
5  
6  
7  
8  
9  
10  
11  
12  
13  
14  
15  
16  
17  
18  
19  
20  
21  
22  
23  
24  
25  
26  
27  
28  
29  
30  
31  
32  
33  
34  
35  
36  
37  
38  
39  
40  
41  
42  
43  
44  
45  
46  
47  
48  
49  
50  
51  
52  
53  
54  
55  
56  
57  
58  
59  
60

1216

For peer review only

## Preferred Reporting Items for Systematic reviews and Meta-Analyses extension for Scoping Reviews (PRISMA-ScR) Checklist

| SECTION                                               | ITEM | PRISMA-ScR CHECKLIST ITEM                                                                                                                                                                                                                                                                                  | REPORTED ON PAGE # |
|-------------------------------------------------------|------|------------------------------------------------------------------------------------------------------------------------------------------------------------------------------------------------------------------------------------------------------------------------------------------------------------|--------------------|
| <b>TITLE</b>                                          |      |                                                                                                                                                                                                                                                                                                            |                    |
| Title                                                 | 1    | Identify the report as a scoping review.                                                                                                                                                                                                                                                                   |                    |
| <b>ABSTRACT</b>                                       |      |                                                                                                                                                                                                                                                                                                            |                    |
| Structured summary                                    | 2    | Provide a structured summary that includes (as applicable): background, objectives, eligibility criteria, sources of evidence, charting methods, results, and conclusions that relate to the review questions and objectives.                                                                              |                    |
| <b>INTRODUCTION</b>                                   |      |                                                                                                                                                                                                                                                                                                            |                    |
| Rationale                                             | 3    | Describe the rationale for the review in the context of what is already known. Explain why the review questions/objectives lend themselves to a scoping review approach.                                                                                                                                   |                    |
| Objectives                                            | 4    | Provide an explicit statement of the questions and objectives being addressed with reference to their key elements (e.g., population or participants, concepts, and context) or other relevant key elements used to conceptualize the review questions and/or objectives.                                  |                    |
| <b>METHODS</b>                                        |      |                                                                                                                                                                                                                                                                                                            |                    |
| Protocol and registration                             | 5    | Indicate whether a review protocol exists; state if and where it can be accessed (e.g., a Web address); and if available, provide registration information, including the registration number.                                                                                                             |                    |
| Eligibility criteria                                  | 6    | Specify characteristics of the sources of evidence used as eligibility criteria (e.g., years considered, language, and publication status), and provide a rationale.                                                                                                                                       |                    |
| Information sources*                                  | 7    | Describe all information sources in the search (e.g., databases with dates of coverage and contact with authors to identify additional sources), as well as the date the most recent search was executed.                                                                                                  |                    |
| Search                                                | 8    | Present the full electronic search strategy for at least 1 database, including any limits used, such that it could be repeated.                                                                                                                                                                            |                    |
| Selection of sources of evidence†                     | 9    | State the process for selecting sources of evidence (i.e., screening and eligibility) included in the scoping review.                                                                                                                                                                                      |                    |
| Data charting process‡                                | 10   | Describe the methods of charting data from the included sources of evidence (e.g., calibrated forms or forms that have been tested by the team before their use, and whether data charting was done independently or in duplicate) and any processes for obtaining and confirming data from investigators. |                    |
| Data items                                            | 11   | List and define all variables for which data were sought and any assumptions and simplifications made.                                                                                                                                                                                                     |                    |
| Critical appraisal of individual sources of evidence§ | 12   | If done, provide a rationale for conducting a critical appraisal of included sources of evidence; describe the methods used and how this information was used in any data synthesis (if appropriate).                                                                                                      |                    |
| Synthesis of results                                  | 13   | Describe the methods of handling and summarizing the data that were charted.                                                                                                                                                                                                                               |                    |

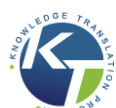



| SECTION                                       | ITEM | PRISMA-ScR CHECKLIST ITEM                                                                                                                                                                       | REPORTED ON PAGE # |
|-----------------------------------------------|------|-------------------------------------------------------------------------------------------------------------------------------------------------------------------------------------------------|--------------------|
| <b>RESULTS</b>                                |      |                                                                                                                                                                                                 |                    |
| Selection of sources of evidence              | 14   | Give numbers of sources of evidence screened, assessed for eligibility, and included in the review, with reasons for exclusions at each stage, ideally using a flow diagram.                    |                    |
| Characteristics of sources of evidence        | 15   | For each source of evidence, present characteristics for which data were charted and provide the citations.                                                                                     |                    |
| Critical appraisal within sources of evidence | 16   | If done, present data on critical appraisal of included sources of evidence (see item 12).                                                                                                      |                    |
| Results of individual sources of evidence     | 17   | For each included source of evidence, present the relevant data that were charted that relate to the review questions and objectives.                                                           |                    |
| Synthesis of results                          | 18   | Summarize and/or present the charting results as they relate to the review questions and objectives.                                                                                            |                    |
| <b>DISCUSSION</b>                             |      |                                                                                                                                                                                                 |                    |
| Summary of evidence                           | 19   | Summarize the main results (including an overview of concepts, themes, and types of evidence available), link to the review questions and objectives, and consider the relevance to key groups. |                    |
| Limitations                                   | 20   | Discuss the limitations of the scoping review process.                                                                                                                                          |                    |
| Conclusions                                   | 21   | Provide a general interpretation of the results with respect to the review questions and objectives, as well as potential implications and/or next steps.                                       |                    |
| <b>FUNDING</b>                                |      |                                                                                                                                                                                                 |                    |
| Funding                                       | 22   | Describe sources of funding for the included sources of evidence, as well as sources of funding for the scoping review. Describe the role of the funders of the scoping review.                 |                    |

JBI = Joanna Briggs Institute; PRISMA-ScR = Preferred Reporting Items for Systematic reviews and Meta-Analyses extension for Scoping Reviews.

\* Where *sources of evidence* (see second footnote) are compiled from, such as bibliographic databases, social media platforms, and Web sites.

† A more inclusive/heterogeneous term used to account for the different types of evidence or data sources (e.g., quantitative and/or qualitative research, expert opinion, and policy documents) that may be eligible in a scoping review as opposed to only studies. This is not to be confused with *information sources* (see first footnote).

‡ The frameworks by Arksey and O'Malley (6) and Levac and colleagues (7) and the JBI guidance (4, 5) refer to the process of data extraction in a scoping review as data charting.

§ The process of systematically examining research evidence to assess its validity, results, and relevance before using it to inform a decision. This term is used for items 12 and 19 instead of "risk of bias" (which is more applicable to systematic reviews of interventions) to include and acknowledge the various sources of evidence that may be used in a scoping review (e.g., quantitative and/or qualitative research, expert opinion, and policy document).

From: Tricco AC, Lillie E, Zarin W, O'Brien KK, Colquhoun H, Levac D, et al. PRISMA Extension for Scoping Reviews (PRISMA-ScR): Checklist and Explanation. *Ann Intern Med.* 2018;169:467–473. doi: [10.7326/M18-0850](https://doi.org/10.7326/M18-0850).

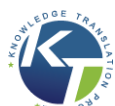

## Supplementary file 2. Detailed search strategy

### I.1. EconLit

|                            |                            |
|----------------------------|----------------------------|
| Database name              | EconLit                    |
| Database search engine     | OvidSP                     |
| Dates of database coverage | 1886 to September 12, 2019 |
| Date search conducted      | 17 September 2019          |
| Total number of hits       | 348                        |

| # | Searches                                                                                                                                                                                                                                                                                                                                                                                                                                                                                                                                                                                                                                                                                                                                                                                                                                                                                                                                                                                                                                                                                                                                                                                                                                                                                                                                                                                                                                                                                                  | Results |
|---|-----------------------------------------------------------------------------------------------------------------------------------------------------------------------------------------------------------------------------------------------------------------------------------------------------------------------------------------------------------------------------------------------------------------------------------------------------------------------------------------------------------------------------------------------------------------------------------------------------------------------------------------------------------------------------------------------------------------------------------------------------------------------------------------------------------------------------------------------------------------------------------------------------------------------------------------------------------------------------------------------------------------------------------------------------------------------------------------------------------------------------------------------------------------------------------------------------------------------------------------------------------------------------------------------------------------------------------------------------------------------------------------------------------------------------------------------------------------------------------------------------------|---------|
| 1 | asylum* OR displaced OR emigra* OR emigre* OR foreign born OR foreign labor OR foreign labour OR foreign work* OR foreign-born OR foreign-work* OR foreigner* OR immigra* OR migra* OR people of concern OR person of concern OR persons of concern OR refugee* OR smuggl* OR traffick* OR transient* OR transmigrant*                                                                                                                                                                                                                                                                                                                                                                                                                                                                                                                                                                                                                                                                                                                                                                                                                                                                                                                                                                                                                                                                                                                                                                                    | 120,090 |
| 2 | abnormalit* OR abortion* OR abscess* OR accident* OR ache* OR aids OR ailment* OR alcohol* OR allerg* OR anorexia OR AMR OR antibiotic resistan* OR antimicrobial resistan* OR anxiet* OR allerg* OR apnoea OR arthritis OR ascariasis OR assault* OR asthma OR attack* OR bacteri* OR bipolar OR bite* OR blastoma* OR bleed* OR blind OR blood OR burn* OR cancer* OR cardio* OR Chagas OR chlamydia OR cholesterol OR coma OR complication* OR condition* OR condom* OR contraception OR cyst* OR dead OR deaf OR death* OR decay OR deform* OR dehydrat* OR dementia OR dengue OR depress* OR diabetes OR diarrhoea OR disabilit* OR disease* OR disorder* OR dracunculiasis OR drug* OR dysfunction* OR eczema OR enlargement* OR epilep* OR exhaust* OR failure OR fatal* OR fatigue OR fever* OR filariasis OR flu OR gall stone* gallstone* OR gonorrhoea OR headache* OR health OR healthcare OR hearing loss OR helminth* OR hepatitis OR hernia* OR herpe* OR HIV OR hookworm* OR HPV OR hypertension OR illness* OR indigestion* OR infect* OR inflame* OR injur* OR leishmaniasis OR leprosy OR leukaemia OR leukemia OR lice OR life expectancy OR malaria OR malformat* OR malnutrition OR measles OR medical OR melanoma* OR mental* OR migraine OR miscarriage* OR morbidit* OR mortalit* OR muscl* OR myeloma OR nausea OR neuro* OR nutrition* OR onchocerciasis OR osteoarthritis OR osteoporosis OR pain* OR parasite* OR patient care OR physical activ* OR pneumonia OR poison* OR | 373,019 |

|    |                                                                                                                                                                                                                                                                                                                                                                                                                                                                                                                                                                                                        |         |
|----|--------------------------------------------------------------------------------------------------------------------------------------------------------------------------------------------------------------------------------------------------------------------------------------------------------------------------------------------------------------------------------------------------------------------------------------------------------------------------------------------------------------------------------------------------------------------------------------------------------|---------|
|    | psoriasis OR psychiatric OR psychos* OR rabies OR rape* OR reproductiv* OR rheuma* OR ringworm* OR sarcoma* OR scabies OR schistosomiasis OR schizophren* OR seizure* OR sepsis* OR sexual* OR shock* OR sick* OR smoking OR sore* OR STD* OR stillbirth* OR stress* OR stroke* OR suicid* OR sunburn* OR syndrome* OR syphilis OR TB OR thrombosis OR tobacco OR STI* OR toothache* OR trachoma OR trauma* OR trichuriasis OR trichomoniasis OR trypanosomiasis OR tuberculosis OR tumor* OR tumour* OR ulcer* OR violence OR virus* OR vomit* OR wart* OR well-being OR wellbeing OR worm* OR wound* |         |
|    |                                                                                                                                                                                                                                                                                                                                                                                                                                                                                                                                                                                                        |         |
| 3  | Malaysia OR Johor OR Kedah OR Kelantan OR Kuala Lumpur OR Labuan OR Malacca OR Melaka OR Malaya OR Negeri Sembilan OR Pahang OR Penang OR Perak OR Perlis OR Putrajaya OR Sabah OR Sarawak OR Selangor OR Terengganu                                                                                                                                                                                                                                                                                                                                                                                   | 6,883   |
| 4  | Malaysian                                                                                                                                                                                                                                                                                                                                                                                                                                                                                                                                                                                              | 1,654   |
| 5  | area* OR Borneo OR city OR cities OR district* OR island* OR isle* OR province* OR region* OR state* OR territor* OR village*                                                                                                                                                                                                                                                                                                                                                                                                                                                                          | 367,269 |
| 6  | 4 AND 5                                                                                                                                                                                                                                                                                                                                                                                                                                                                                                                                                                                                | 361     |
| 7  | 3 OR 6                                                                                                                                                                                                                                                                                                                                                                                                                                                                                                                                                                                                 | 6,925   |
|    |                                                                                                                                                                                                                                                                                                                                                                                                                                                                                                                                                                                                        |         |
| 8  | 1 AND 2 AND 7                                                                                                                                                                                                                                                                                                                                                                                                                                                                                                                                                                                          | 348     |
|    |                                                                                                                                                                                                                                                                                                                                                                                                                                                                                                                                                                                                        |         |
| 9  | Animal migration OR bird migration OR cell* OR membrane* OR molecu*                                                                                                                                                                                                                                                                                                                                                                                                                                                                                                                                    | 2,622   |
| 10 | 8 NOT 9                                                                                                                                                                                                                                                                                                                                                                                                                                                                                                                                                                                                | 348     |

## I.2. Embase

|                            |                           |
|----------------------------|---------------------------|
| Database name              | Embase                    |
| Database search engine     | OvidSP                    |
| Dates of database coverage | 1947 to 2019 September 13 |
| Date search conducted      | 17 September 2019         |
| Total number of hits       | 549                       |

| #  | Searches                                                                                                                                                                                                                                                                                                               | Results    |
|----|------------------------------------------------------------------------------------------------------------------------------------------------------------------------------------------------------------------------------------------------------------------------------------------------------------------------|------------|
| 1  | asylum* OR displaced OR emigra* OR emigre* OR foreign born OR foreign labor OR foreign labour OR foreign work* OR foreign-born OR foreign-work* OR foreigner* OR immigra* OR migra* OR people of concern OR person of concern OR persons of concern OR refugee* OR smuggl* OR traffick* OR transient* OR transmigrant* | 1,124,805  |
| 2  | asylum seeker [MeSH]                                                                                                                                                                                                                                                                                                   | 793        |
| 3  | emigrant [MeSH]                                                                                                                                                                                                                                                                                                        | 293        |
| 4  | foreign worker [MeSH]                                                                                                                                                                                                                                                                                                  | 5,306      |
| 5  | human trafficking [MeSH]                                                                                                                                                                                                                                                                                               | 697        |
| 6  | migrant worker [MeSH]                                                                                                                                                                                                                                                                                                  | 1,548      |
| 7  | migrant [MeSH]                                                                                                                                                                                                                                                                                                         | 35,567     |
| 8  | migration [MeSH]                                                                                                                                                                                                                                                                                                       | 45,436     |
| 9  | immigrant [MeSH]                                                                                                                                                                                                                                                                                                       | 16,376     |
| 10 | refugee [MeSH]                                                                                                                                                                                                                                                                                                         | 12,425     |
| 11 | refugee camp [MeSH]                                                                                                                                                                                                                                                                                                    | 553        |
| 12 | undocumented immigrant [MeSH]                                                                                                                                                                                                                                                                                          | 350        |
| 13 | 1 OR 2 OR 3 OR 4 OR 5 OR 6 OR 7 OR 8 OR 9 OR 10 OR 11 OR 12                                                                                                                                                                                                                                                            | 1,125,119  |
| 14 | abnormalit* OR abortion* OR abscess* OR accident* OR ache* OR aids OR ailment* OR alcohol* OR allerg* OR anorexia OR AMR OR antibiotic resistan* OR antimicrobial resistan* OR anxiet* OR allerg* OR apnoea OR arthritis OR ascariasis OR assault* OR asthma OR attack* OR bacteri* OR bipolar OR bite* OR blastoma*   | 31,271,711 |

|    |                                                                                                                                                                                                                                                                                                                                                                                                                                                                                                                                                                                                                                                                                                                                                                                                                                                                                                                                                                                                                                                                                                                                                                                                                                                                                                                                                                                                                                                                                                                                                                                                                                                                                                                                                                                          |            |
|----|------------------------------------------------------------------------------------------------------------------------------------------------------------------------------------------------------------------------------------------------------------------------------------------------------------------------------------------------------------------------------------------------------------------------------------------------------------------------------------------------------------------------------------------------------------------------------------------------------------------------------------------------------------------------------------------------------------------------------------------------------------------------------------------------------------------------------------------------------------------------------------------------------------------------------------------------------------------------------------------------------------------------------------------------------------------------------------------------------------------------------------------------------------------------------------------------------------------------------------------------------------------------------------------------------------------------------------------------------------------------------------------------------------------------------------------------------------------------------------------------------------------------------------------------------------------------------------------------------------------------------------------------------------------------------------------------------------------------------------------------------------------------------------------|------------|
|    | OR bleed* OR blind OR blood OR burn* OR cancer* OR cardio* OR Chagas OR chlamydia OR cholesterol OR coma OR complication* OR condition* OR condom* OR contraception OR cyst* OR dead OR deaf OR death* OR decay OR deform* OR dehydrat* OR dementia OR dengue OR depress* OR diabetes OR diarrhoea OR disabilit* OR disease* OR disorder* OR dracunculiasis OR drug* OR dysfunction* OR eczema OR enlargement* OR epilep* OR exhaust* OR failure OR fatal* OR fatigue OR fever* OR filariasis OR flu OR gall stone* gallstone* OR gonorrhoea OR headache* OR health OR healthcare OR hearing loss OR helminth* OR hepatitis OR hernia* OR herpe* OR HIV OR hookworm* OR HPV OR hypertension OR illness* OR indigestion* OR infect* OR inflame* OR injur* OR leishmaniasis OR leprosy OR leukaemia OR leukemia OR lice OR life expectancy OR malaria OR malformat* malnutrition OR measles OR medical OR melanoma* OR mental* OR migraine OR miscarriage* OR morbidit* OR mortalit* OR muscl* OR myeloma OR nausea OR neuro* OR nutrition* OR onchocerciasis OR osteoarthritis OR osteoporosis OR pain* OR parasite* OR patient care OR physical activ* OR pneumonia OR poison* OR psoriasis OR psychiatric OR psychos* OR rabies OR rape* OR reproductiv* OR rheuma* OR ringworm* OR sarcoma* OR scabies OR schistosomiasis OR schizophren* OR seizure* OR sepsis* OR sexual* OR shock* OR sick* OR smoking OR sore* OR STD* OR stillbirth* OR stress* OR stroke* OR suicid* OR sunburn* OR syndrome* OR syphilis OR TB OR thrombosis OR tobacco OR STI* OR toothache* OR trachoma OR trauma* OR trichuriasis OR trichomoniasis OR trypanosomiasis OR tuberculosis OR tumor* OR tumour* OR ulcer* OR violence OR virus* OR vomit* OR wart* OR well-being OR wellbeing OR worm* OR wound* |            |
| 15 | accident [MeSH]                                                                                                                                                                                                                                                                                                                                                                                                                                                                                                                                                                                                                                                                                                                                                                                                                                                                                                                                                                                                                                                                                                                                                                                                                                                                                                                                                                                                                                                                                                                                                                                                                                                                                                                                                                          | 209,815    |
| 16 | diseases [MeSH]                                                                                                                                                                                                                                                                                                                                                                                                                                                                                                                                                                                                                                                                                                                                                                                                                                                                                                                                                                                                                                                                                                                                                                                                                                                                                                                                                                                                                                                                                                                                                                                                                                                                                                                                                                          | 23,553,673 |
| 17 | health [MeSH]                                                                                                                                                                                                                                                                                                                                                                                                                                                                                                                                                                                                                                                                                                                                                                                                                                                                                                                                                                                                                                                                                                                                                                                                                                                                                                                                                                                                                                                                                                                                                                                                                                                                                                                                                                            | 688,819    |
| 18 | health behavior [MeSH]                                                                                                                                                                                                                                                                                                                                                                                                                                                                                                                                                                                                                                                                                                                                                                                                                                                                                                                                                                                                                                                                                                                                                                                                                                                                                                                                                                                                                                                                                                                                                                                                                                                                                                                                                                   | 396,908    |
| 19 | health care [MeSH]                                                                                                                                                                                                                                                                                                                                                                                                                                                                                                                                                                                                                                                                                                                                                                                                                                                                                                                                                                                                                                                                                                                                                                                                                                                                                                                                                                                                                                                                                                                                                                                                                                                                                                                                                                       | 5,107,719  |
| 20 | health care facility [MeSH]                                                                                                                                                                                                                                                                                                                                                                                                                                                                                                                                                                                                                                                                                                                                                                                                                                                                                                                                                                                                                                                                                                                                                                                                                                                                                                                                                                                                                                                                                                                                                                                                                                                                                                                                                              | 1,641,961  |
| 21 | health care policy [MeSH]                                                                                                                                                                                                                                                                                                                                                                                                                                                                                                                                                                                                                                                                                                                                                                                                                                                                                                                                                                                                                                                                                                                                                                                                                                                                                                                                                                                                                                                                                                                                                                                                                                                                                                                                                                | 188,812    |
| 22 | health service [MeSH]                                                                                                                                                                                                                                                                                                                                                                                                                                                                                                                                                                                                                                                                                                                                                                                                                                                                                                                                                                                                                                                                                                                                                                                                                                                                                                                                                                                                                                                                                                                                                                                                                                                                                                                                                                    | 5,405,209  |
| 23 | infection [MeSH]                                                                                                                                                                                                                                                                                                                                                                                                                                                                                                                                                                                                                                                                                                                                                                                                                                                                                                                                                                                                                                                                                                                                                                                                                                                                                                                                                                                                                                                                                                                                                                                                                                                                                                                                                                         | 3,626,633  |
| 24 | injury [MeSH]                                                                                                                                                                                                                                                                                                                                                                                                                                                                                                                                                                                                                                                                                                                                                                                                                                                                                                                                                                                                                                                                                                                                                                                                                                                                                                                                                                                                                                                                                                                                                                                                                                                                                                                                                                            | 2,303,491  |
| 25 | malnutrition [MeSH]                                                                                                                                                                                                                                                                                                                                                                                                                                                                                                                                                                                                                                                                                                                                                                                                                                                                                                                                                                                                                                                                                                                                                                                                                                                                                                                                                                                                                                                                                                                                                                                                                                                                                                                                                                      | 178,039    |

|    |                                                                                                                                                                                                                      |            |
|----|----------------------------------------------------------------------------------------------------------------------------------------------------------------------------------------------------------------------|------------|
| 26 | morbidity [MeSH]                                                                                                                                                                                                     | 361,003    |
| 27 | mortality [MeSH]                                                                                                                                                                                                     | 1,081,969  |
| 28 | neoplasm [MeSH]                                                                                                                                                                                                      | 4,683,051  |
| 29 | parasite [MeSH]                                                                                                                                                                                                      | 36,154     |
| 30 | virus [MeSH]                                                                                                                                                                                                         | 907,130    |
| 31 | 14 OR 15 OR 16 OR 17 OR 18 OR 19 OR 20 OR 21 OR 21 OR 22 OR 23 OR 24 OR 25 OR 26 OR 27 OR 28 OR 29 OR 30                                                                                                             | 32,849,152 |
|    |                                                                                                                                                                                                                      |            |
| 32 | Malaysia OR Johor OR Kedah OR Kelantan OR Kuala Lumpur OR Labuan OR Malacca OR Melaka OR Malaya OR Negeri Sembilan OR Pahang OR Penang OR Perak OR Perlis OR Putrajaya OR Sabah OR Sarawak OR Selangor OR Terengganu | 28,901     |
| 33 | Malaysian                                                                                                                                                                                                            | 1,611      |
| 34 | area* OR Borneo OR city OR cities OR district* OR island* OR isle* OR province* OR region* OR state* OR territor* OR village*                                                                                        | 7,357,992  |
| 35 | 33 AND 34                                                                                                                                                                                                            | 395        |
| 36 | 32 OR 35                                                                                                                                                                                                             | 29,057     |
|    |                                                                                                                                                                                                                      |            |
| 37 | 13 AND 31 AND 36                                                                                                                                                                                                     | 651        |
|    |                                                                                                                                                                                                                      |            |
| 38 | Animal migration OR bird migration OR cell* OR membrane* OR molecu*                                                                                                                                                  | 10,280,170 |
| 39 | 37 NOT 38                                                                                                                                                                                                            | 549        |

### I.3. Global Health

|                            |                      |
|----------------------------|----------------------|
| Database name              | Global Health        |
| Database search engine     | OvidSP               |
| Dates of database coverage | 1910 to 2019 Week 36 |
| Date search conducted      | 17 September 2019    |
| Total number of hits       | 382                  |

| # | Searches                                                                                                                                                                                                                                                                                                                                                                                                                                                                                                                                                                                                                                                                                                                                                                                                                                                                                                                                                                                                                        | Results   |
|---|---------------------------------------------------------------------------------------------------------------------------------------------------------------------------------------------------------------------------------------------------------------------------------------------------------------------------------------------------------------------------------------------------------------------------------------------------------------------------------------------------------------------------------------------------------------------------------------------------------------------------------------------------------------------------------------------------------------------------------------------------------------------------------------------------------------------------------------------------------------------------------------------------------------------------------------------------------------------------------------------------------------------------------|-----------|
| 1 | asylum* OR displaced OR emigra* OR emigre* OR foreign born OR foreign labor OR foreign labour OR foreign work* OR foreign-born OR foreign-work* OR foreigner* OR immigra* OR migra* OR people of concern OR person of concern OR persons of concern OR refugee* OR smuggl* OR traffick* OR transient* OR transmigrant*                                                                                                                                                                                                                                                                                                                                                                                                                                                                                                                                                                                                                                                                                                          | 89,712    |
| 2 | immigrants [MeSH]                                                                                                                                                                                                                                                                                                                                                                                                                                                                                                                                                                                                                                                                                                                                                                                                                                                                                                                                                                                                               | 7,830     |
| 3 | migrant labour [MeSH]                                                                                                                                                                                                                                                                                                                                                                                                                                                                                                                                                                                                                                                                                                                                                                                                                                                                                                                                                                                                           | 1,006     |
| 4 | migrants [MeSH]                                                                                                                                                                                                                                                                                                                                                                                                                                                                                                                                                                                                                                                                                                                                                                                                                                                                                                                                                                                                                 | 3,576     |
| 5 | migration [MeSH]                                                                                                                                                                                                                                                                                                                                                                                                                                                                                                                                                                                                                                                                                                                                                                                                                                                                                                                                                                                                                | 3,819     |
| 6 | refugees [MeSH]                                                                                                                                                                                                                                                                                                                                                                                                                                                                                                                                                                                                                                                                                                                                                                                                                                                                                                                                                                                                                 | 3,687     |
| 7 | 1 OR 2 OR 3 OR 4 OR 5 OR 6                                                                                                                                                                                                                                                                                                                                                                                                                                                                                                                                                                                                                                                                                                                                                                                                                                                                                                                                                                                                      | 89,712    |
| 8 | abnormalit* OR abortion* OR abscess* OR accident* OR ache* OR aids OR ailment* OR alcohol* OR allerg* OR anorexia OR AMR OR antibiotic resistan* OR antimicrobial resistan* OR anxiet* OR allerg* OR apnoea OR arthritis OR ascariasis OR assault* OR asthma OR attack* OR bacteri* OR bipolar OR bite* OR blastoma* OR bleed* OR blind OR blood OR burn* OR cancer* OR cardio* OR Chagas OR chlamydia OR cholesterol OR coma OR complication* OR condition* OR condom* OR contraception OR cyst* OR dead OR deaf OR death* OR decay OR deform* OR dehydrat* OR dementia OR dengue OR depress* OR diabetes OR diarrhoea OR disabilit* OR disease* OR disorder* OR dracunculiasis OR drug* OR dysfunction* OR eczema OR enlargement* OR epilep* OR exhaust* OR failure OR fatal* OR fatigue OR fever* OR filariasis OR flu OR gall stone* gallstone* OR gonorrhoea OR headache* OR health OR healthcare OR hearing loss OR helminth* OR hepatitis OR hernia* OR herpe* OR HIV OR hookworm* OR HPV OR hypertension OR illness* OR | 3,675,317 |

|    |                                                                                                                                                                                                                                                                                                                                                                                                                                                                                                                                                                                                                                                                                                                                                                                                                                                                                                                                                                                                                                                                                  |           |
|----|----------------------------------------------------------------------------------------------------------------------------------------------------------------------------------------------------------------------------------------------------------------------------------------------------------------------------------------------------------------------------------------------------------------------------------------------------------------------------------------------------------------------------------------------------------------------------------------------------------------------------------------------------------------------------------------------------------------------------------------------------------------------------------------------------------------------------------------------------------------------------------------------------------------------------------------------------------------------------------------------------------------------------------------------------------------------------------|-----------|
|    | indigestion* OR infect* OR inflame* OR injur* OR leishmaniasis OR leprosy OR leukaemia OR leukemia OR lice OR life expectancy OR malaria OR malformat* OR malnutrition OR measles OR medical OR melanoma* OR mental* OR migraine OR miscarriage* OR morbidit* OR mortalit* OR muscl* OR myeloma OR nausea OR neuro* OR nutrition* OR onchocerciasis OR osteoarthritis OR osteoporosis OR pain* OR parasite* OR patient care OR physical activ* OR pneumonia OR poison* OR psoriasis OR psychiatric OR psychos* OR rabies OR rape* OR reproductiv* OR rheuma* OR ringworm* OR sarcoma* OR scabies OR schistosomiasis OR schizophren* OR seizure* OR sepsis* OR sexual* OR shock* OR sick* OR smoking OR sore* OR STD* OR stillbirth* OR stress* OR stroke* OR suicid* OR sunburn* OR syndrome* OR syphilis OR TB OR thrombosis OR tobacco OR STI* OR toothache* OR trachoma OR trauma* OR trichuriasis OR trichomoniasis OR trypanosomiasis OR tuberculosis OR tumor* OR tumour* OR ulcer* OR violence OR virus* OR vomit* OR wart* OR well-being OR wellbeing OR worm* OR wound* |           |
| 9  | accidents [MeSH]                                                                                                                                                                                                                                                                                                                                                                                                                                                                                                                                                                                                                                                                                                                                                                                                                                                                                                                                                                                                                                                                 | 14,359    |
| 10 | diseases [MeSH]                                                                                                                                                                                                                                                                                                                                                                                                                                                                                                                                                                                                                                                                                                                                                                                                                                                                                                                                                                                                                                                                  | 2,302,791 |
| 11 | health [MeSH]                                                                                                                                                                                                                                                                                                                                                                                                                                                                                                                                                                                                                                                                                                                                                                                                                                                                                                                                                                                                                                                                    | 283,009   |
| 12 | health behaviour [MeSH]                                                                                                                                                                                                                                                                                                                                                                                                                                                                                                                                                                                                                                                                                                                                                                                                                                                                                                                                                                                                                                                          | 11,560    |
| 13 | health care [MeSH]                                                                                                                                                                                                                                                                                                                                                                                                                                                                                                                                                                                                                                                                                                                                                                                                                                                                                                                                                                                                                                                               | 91,876    |
| 14 | health policy [MeSH]                                                                                                                                                                                                                                                                                                                                                                                                                                                                                                                                                                                                                                                                                                                                                                                                                                                                                                                                                                                                                                                             | 20,150    |
| 15 | health services [MeSH]                                                                                                                                                                                                                                                                                                                                                                                                                                                                                                                                                                                                                                                                                                                                                                                                                                                                                                                                                                                                                                                           | 88,605    |
| 16 | infection [MeSH]                                                                                                                                                                                                                                                                                                                                                                                                                                                                                                                                                                                                                                                                                                                                                                                                                                                                                                                                                                                                                                                                 | 100,189   |
| 17 | injuries [MeSH]                                                                                                                                                                                                                                                                                                                                                                                                                                                                                                                                                                                                                                                                                                                                                                                                                                                                                                                                                                                                                                                                  | 3,171     |
| 18 | malnutrition [MeSH]                                                                                                                                                                                                                                                                                                                                                                                                                                                                                                                                                                                                                                                                                                                                                                                                                                                                                                                                                                                                                                                              | 28,215    |
| 19 | morbidity [MeSH]                                                                                                                                                                                                                                                                                                                                                                                                                                                                                                                                                                                                                                                                                                                                                                                                                                                                                                                                                                                                                                                                 | 28,845    |
| 20 | mortality [MeSH]                                                                                                                                                                                                                                                                                                                                                                                                                                                                                                                                                                                                                                                                                                                                                                                                                                                                                                                                                                                                                                                                 | 135,836   |
| 21 | neoplasm [MeSH]                                                                                                                                                                                                                                                                                                                                                                                                                                                                                                                                                                                                                                                                                                                                                                                                                                                                                                                                                                                                                                                                  | 225,495   |
| 22 | parasites [MeSH]                                                                                                                                                                                                                                                                                                                                                                                                                                                                                                                                                                                                                                                                                                                                                                                                                                                                                                                                                                                                                                                                 | 488,622   |
| 23 | viruses [MeSH]                                                                                                                                                                                                                                                                                                                                                                                                                                                                                                                                                                                                                                                                                                                                                                                                                                                                                                                                                                                                                                                                   | 496,168   |
| 24 | 8 OR 9 OR 10 OR 11 OR 12 OR 13 OR 14 OR 15 OR 16 OR 17 OR 18 OR 19 OR 20 OR 21 OR 22 OR 23                                                                                                                                                                                                                                                                                                                                                                                                                                                                                                                                                                                                                                                                                                                                                                                                                                                                                                                                                                                       | 3,688,190 |



|    |                                                                                                                                                                                                                      |           |
|----|----------------------------------------------------------------------------------------------------------------------------------------------------------------------------------------------------------------------|-----------|
|    |                                                                                                                                                                                                                      |           |
| 25 | Malaysia OR Johor OR Kedah OR Kelantan OR Kuala Lumpur OR Labuan OR Malacca OR Melaka OR Malaya OR Negeri Sembilan OR Pahang OR Penang OR Perak OR Perlis OR Putrajaya OR Sabah OR Sarawak OR Selangor OR Terengganu | 17,417    |
| 26 | Malaysian                                                                                                                                                                                                            | 3,366     |
| 27 | area* OR Borneo OR city OR cities OR district* OR island* OR isle* OR province* OR region* OR state* OR territor* OR village*                                                                                        | 1,392,874 |
| 28 | 26 AND 27                                                                                                                                                                                                            | 1,138     |
| 29 | 25 OR 28                                                                                                                                                                                                             | 17,513    |
|    |                                                                                                                                                                                                                      |           |
| 30 | 7 AND 24 AND 29                                                                                                                                                                                                      | 429       |
|    |                                                                                                                                                                                                                      |           |
| 31 | Animal migration OR bird migration OR cell* OR membrane* OR molercul*                                                                                                                                                | 833,650   |
| 32 | 30 NOT 31                                                                                                                                                                                                            | 382       |

#### I.4. Medline

|                            |                               |
|----------------------------|-------------------------------|
| Database name              | Medline                       |
| Database search engine     | OvidSP                        |
| Dates of database coverage | 1946 to September Week 1 2019 |
| Date search conducted      | 17 September 2019             |
| Total number of hits       | 364                           |

| # | Searches                                                                                                                                                                                                                                                                                                                                                                                                                                                                                                                                                                                                                                                                                                                                                                                                                                                                                                                                                                                                                        | Results    |
|---|---------------------------------------------------------------------------------------------------------------------------------------------------------------------------------------------------------------------------------------------------------------------------------------------------------------------------------------------------------------------------------------------------------------------------------------------------------------------------------------------------------------------------------------------------------------------------------------------------------------------------------------------------------------------------------------------------------------------------------------------------------------------------------------------------------------------------------------------------------------------------------------------------------------------------------------------------------------------------------------------------------------------------------|------------|
| 1 | asylum* OR displaced OR emigra* OR emigre* OR foreign born OR foreign labor OR foreign labour OR foreign work* OR foreign-born OR foreign-work* OR foreigner* OR immigra* OR migra* OR people of concern OR person of concern OR persons of concern OR refugee* OR smuggl* OR traffick* OR transient* OR transmigrant*                                                                                                                                                                                                                                                                                                                                                                                                                                                                                                                                                                                                                                                                                                          | 720,051    |
| 2 | “Emigrants and Immigrants” [MeSH]                                                                                                                                                                                                                                                                                                                                                                                                                                                                                                                                                                                                                                                                                                                                                                                                                                                                                                                                                                                               | 11,337     |
| 3 | “Emigration and Immigration” [MeSH]                                                                                                                                                                                                                                                                                                                                                                                                                                                                                                                                                                                                                                                                                                                                                                                                                                                                                                                                                                                             | 24,805     |
| 4 | Human Trafficking [MeSH]                                                                                                                                                                                                                                                                                                                                                                                                                                                                                                                                                                                                                                                                                                                                                                                                                                                                                                                                                                                                        | 347        |
| 5 | Refugees [MeSH]                                                                                                                                                                                                                                                                                                                                                                                                                                                                                                                                                                                                                                                                                                                                                                                                                                                                                                                                                                                                                 | 9,508      |
| 6 | “Transients and Migrants”                                                                                                                                                                                                                                                                                                                                                                                                                                                                                                                                                                                                                                                                                                                                                                                                                                                                                                                                                                                                       | 10,955     |
| 7 | 1 OR 2 OR 3 OR 4 OR 5 OR 6                                                                                                                                                                                                                                                                                                                                                                                                                                                                                                                                                                                                                                                                                                                                                                                                                                                                                                                                                                                                      | 720,051    |
| 8 | abnormalit* OR abortion* OR abscess* OR accident* OR ache* OR aids OR ailment* OR alcohol* OR allerg* OR anorexia OR AMR OR antibiotic resistan* OR antimicrobial resistan* OR anxiet* OR allerg* OR apnoea OR arthritis OR ascariasis OR assault* OR asthma OR attack* OR bacteri* OR bipolar OR bite* OR blastoma* OR bleed* OR blind OR blood OR burn* OR cancer* OR cardio* OR Chagas OR chlamydia OR cholesterol OR coma OR complication* OR condition* OR condom* OR contraception OR cyst* OR dead OR deaf OR death* OR decay OR deform* OR dehydrat* OR dementia OR dengue OR depress* OR diabetes OR diarrhoea OR disabilit* OR disease* OR disorder* OR dracunculiasis OR drug* OR dysfunction* OR eczema OR enlargement* OR epilep* OR exhaust* OR failure OR fatal* OR fatigue OR fever* OR filariasis OR flu OR gall stone* gallstone* OR gonorrhoea OR headache* OR health OR healthcare OR hearing loss OR helminth* OR hepatitis OR hernia* OR herpe* OR HIV OR hookworm* OR HPV OR hypertension OR illness* OR | 21,089,958 |

|    |                                                                                                                                                                                                                                                                                                                                                                                                                                                                                                                                                                                                                                                                                                                                                                                                                                                                                                                                                                                                                                                                                  |           |
|----|----------------------------------------------------------------------------------------------------------------------------------------------------------------------------------------------------------------------------------------------------------------------------------------------------------------------------------------------------------------------------------------------------------------------------------------------------------------------------------------------------------------------------------------------------------------------------------------------------------------------------------------------------------------------------------------------------------------------------------------------------------------------------------------------------------------------------------------------------------------------------------------------------------------------------------------------------------------------------------------------------------------------------------------------------------------------------------|-----------|
|    | indigestion* OR infect* OR inflame* OR injur* OR leishmaniasis OR leprosy OR leukaemia OR leukemia OR lice OR life expectancy OR malaria OR malformat* OR malnutrition OR measles OR medical OR melanoma* OR mental* OR migraine OR miscarriage* OR morbidit* OR mortalit* OR muscl* OR myeloma OR nausea OR neuro* OR nutrition* OR onchocerciasis OR osteoarthritis OR osteoporosis OR pain* OR parasite* OR patient care OR physical activ* OR pneumonia OR poison* OR psoriasis OR psychiatric OR psychos* OR rabies OR rape* OR reproductiv* OR rheuma* OR ringworm* OR sarcoma* OR scabies OR schistosomiasis OR schizophren* OR seizure* OR sepsis* OR sexual* OR shock* OR sick* OR smoking OR sore* OR STD* OR stillbirth* OR stress* OR stroke* OR suicid* OR sunburn* OR syndrome* OR syphilis OR TB OR thrombosis OR tobacco OR STI* OR toothache* OR trachoma OR trauma* OR trichuriasis OR trichomoniasis OR trypanosomiasis OR tuberculosis OR tumor* OR tumour* OR ulcer* OR violence OR virus* OR vomit* OR wart* OR well-being OR wellbeing OR worm* OR wound* |           |
| 9  | Accidents [MeSH]                                                                                                                                                                                                                                                                                                                                                                                                                                                                                                                                                                                                                                                                                                                                                                                                                                                                                                                                                                                                                                                                 | 182,330   |
| 10 | “Delivery of Health Care” [MeSH]                                                                                                                                                                                                                                                                                                                                                                                                                                                                                                                                                                                                                                                                                                                                                                                                                                                                                                                                                                                                                                                 | 1,028,923 |
| 11 | Disease [MeSH]                                                                                                                                                                                                                                                                                                                                                                                                                                                                                                                                                                                                                                                                                                                                                                                                                                                                                                                                                                                                                                                                   | 181,324   |
| 12 | Health [MeSH]                                                                                                                                                                                                                                                                                                                                                                                                                                                                                                                                                                                                                                                                                                                                                                                                                                                                                                                                                                                                                                                                    | 344,725   |
| 13 | Health Behavior [MeSH]                                                                                                                                                                                                                                                                                                                                                                                                                                                                                                                                                                                                                                                                                                                                                                                                                                                                                                                                                                                                                                                           | 301,243   |
| 14 | Health Facilities [MeSH]                                                                                                                                                                                                                                                                                                                                                                                                                                                                                                                                                                                                                                                                                                                                                                                                                                                                                                                                                                                                                                                         | 756,386   |
| 15 | Health Policy [MeSH]                                                                                                                                                                                                                                                                                                                                                                                                                                                                                                                                                                                                                                                                                                                                                                                                                                                                                                                                                                                                                                                             | 102,614   |
| 16 | Health Services [MeSH]                                                                                                                                                                                                                                                                                                                                                                                                                                                                                                                                                                                                                                                                                                                                                                                                                                                                                                                                                                                                                                                           | 2,044,089 |
| 17 | Infection [MeSH]                                                                                                                                                                                                                                                                                                                                                                                                                                                                                                                                                                                                                                                                                                                                                                                                                                                                                                                                                                                                                                                                 | 765,299   |
| 18 | Malnutrition [MeSH]                                                                                                                                                                                                                                                                                                                                                                                                                                                                                                                                                                                                                                                                                                                                                                                                                                                                                                                                                                                                                                                              | 118,335   |
| 19 | Morbidity [MeSH]                                                                                                                                                                                                                                                                                                                                                                                                                                                                                                                                                                                                                                                                                                                                                                                                                                                                                                                                                                                                                                                                 | 524,764   |
| 20 | Mortality [MeSH]                                                                                                                                                                                                                                                                                                                                                                                                                                                                                                                                                                                                                                                                                                                                                                                                                                                                                                                                                                                                                                                                 | 364,390   |
| 21 | Neoplasms [MeSH]                                                                                                                                                                                                                                                                                                                                                                                                                                                                                                                                                                                                                                                                                                                                                                                                                                                                                                                                                                                                                                                                 | 3,212,183 |
| 22 | Parasites [ MeSH]                                                                                                                                                                                                                                                                                                                                                                                                                                                                                                                                                                                                                                                                                                                                                                                                                                                                                                                                                                                                                                                                | 6,776     |
| 23 | Viruses [MeSH]                                                                                                                                                                                                                                                                                                                                                                                                                                                                                                                                                                                                                                                                                                                                                                                                                                                                                                                                                                                                                                                                   | 754,871   |
| 24 | “Wounds and Injuries” [MeSH]                                                                                                                                                                                                                                                                                                                                                                                                                                                                                                                                                                                                                                                                                                                                                                                                                                                                                                                                                                                                                                                     | 873,897   |

|    |                                                                                                                                                                                                                            |            |
|----|----------------------------------------------------------------------------------------------------------------------------------------------------------------------------------------------------------------------------|------------|
| 25 | 8 OR 9 OR 10 OR 11 OR 12 OR 13 OR 14 OR 15 OR 16 OR 17 OR 18 OR 19 OR 20<br>OR 21 OR 22 OR 23 OR 24                                                                                                                        | 21,770,503 |
|    |                                                                                                                                                                                                                            |            |
| 26 | Malaysia OR Johor OR Kedah OR Kelantan OR Kuala Lumpur OR Labuan OR<br>Malacca OR Melaka OR Malaya OR Negeri Sembilan OR Pahang OR Penang OR Perak<br>OR Perlis OR Putrajaya OR Sabah OR Sarawak OR Selangor OR Terengganu | 17,824     |
| 27 | Malaysian                                                                                                                                                                                                                  | 4,673      |
| 28 | area* OR Borneo OR city OR cities OR district* OR island* OR isle* OR province*<br>OR region* OR state* OR territor* OR village*                                                                                           | 4,572,673  |
| 29 | 27 AND 28                                                                                                                                                                                                                  | 1,297      |
| 30 | 26 OR 29                                                                                                                                                                                                                   | 18,038     |
|    |                                                                                                                                                                                                                            |            |
| 31 | 7 AND 25 AND 30                                                                                                                                                                                                            | 404        |
|    |                                                                                                                                                                                                                            |            |
| 32 | Animal migration OR bird migration OR cell* OR membrane* OR molecu*                                                                                                                                                        | 6,952,122  |
| 33 | 31 NOT 32                                                                                                                                                                                                                  | 364        |

### I.5. PsychInfo

|                            |                               |
|----------------------------|-------------------------------|
| Database name              | PsychInfo                     |
| Database search engine     | OvidSP                        |
| Dates of database coverage | 1806 to September Week 2 2019 |
| Date search conducted      | 17 September 2019             |
| Total number of hits       | 91                            |

| # | Searches                                                                                                                                                                                                                                                                                                                                                                                                                                                                                                                                                                                                                                                                                                                                                                                                                                                                       | Results   |
|---|--------------------------------------------------------------------------------------------------------------------------------------------------------------------------------------------------------------------------------------------------------------------------------------------------------------------------------------------------------------------------------------------------------------------------------------------------------------------------------------------------------------------------------------------------------------------------------------------------------------------------------------------------------------------------------------------------------------------------------------------------------------------------------------------------------------------------------------------------------------------------------|-----------|
| 1 | asylum* OR displaced OR emigra* OR emigre* OR foreign born OR foreign labor OR foreign labour OR foreign work* OR foreign-born OR foreign-work* OR foreigner* OR immigra* OR migra* OR people of concern OR person of concern OR persons of concern OR refugee* OR smuggl* OR traffick* OR transient* OR transmigrant*                                                                                                                                                                                                                                                                                                                                                                                                                                                                                                                                                         | 112,729   |
| 2 | Asylum seeking [MeSH]                                                                                                                                                                                                                                                                                                                                                                                                                                                                                                                                                                                                                                                                                                                                                                                                                                                          | 487       |
| 3 | Foreign workers [MeSH]                                                                                                                                                                                                                                                                                                                                                                                                                                                                                                                                                                                                                                                                                                                                                                                                                                                         | 530       |
| 4 | Human migration [MeSH]                                                                                                                                                                                                                                                                                                                                                                                                                                                                                                                                                                                                                                                                                                                                                                                                                                                         | 12,788    |
| 5 | Human trafficking [MeSH]                                                                                                                                                                                                                                                                                                                                                                                                                                                                                                                                                                                                                                                                                                                                                                                                                                                       | 844       |
| 6 | Immigration [MeSH]                                                                                                                                                                                                                                                                                                                                                                                                                                                                                                                                                                                                                                                                                                                                                                                                                                                             | 21,250    |
| 7 | Refugees [MeSH]                                                                                                                                                                                                                                                                                                                                                                                                                                                                                                                                                                                                                                                                                                                                                                                                                                                                | 5,580     |
| 8 | 1 OR 2 OR 3 OR 4 OR 5 OR 6 OR 7                                                                                                                                                                                                                                                                                                                                                                                                                                                                                                                                                                                                                                                                                                                                                                                                                                                | 113,572   |
| 9 | abnormalit* OR abortion* OR abscess* OR accident* OR ache* OR aids OR ailment* OR alcohol* OR allerg* OR anorexia OR AMR OR antibiotic resistan* OR antimicrobial resistan* OR anxiet* OR allerg* OR apnoea OR arthritis OR ascariasis OR assault* OR asthma OR attack* OR bacteri* OR bipolar OR bite* OR blastoma* OR bleed* OR blind OR blood OR burn* OR cancer* OR cardio* OR Chagas OR chlamydia OR cholesterol OR coma OR complication* OR condition* OR condom* OR contraception OR cyst* OR dead OR deaf OR death* OR decay OR deform* OR dehydrat* OR dementia OR dengue OR depress* OR diabetes OR diarrhoea OR disabilit* OR disease* OR disorder* OR dracunculiasis OR drug* OR dysfunction* OR eczema OR enlargement* OR epilep* OR exhaust* OR failure OR fatal* OR fatigue OR fever* OR filariasis OR flu OR gall stone* gallstone* OR gonorrhoea OR headache* | 3,197,191 |

|    |                                                                                                                                                                                                                                                                                                                                                                                                                                                                                                                                                                                                                                                                                                                                                                                                                                                                                                                                                                                                                                                                                                                                                                                                                                   |         |
|----|-----------------------------------------------------------------------------------------------------------------------------------------------------------------------------------------------------------------------------------------------------------------------------------------------------------------------------------------------------------------------------------------------------------------------------------------------------------------------------------------------------------------------------------------------------------------------------------------------------------------------------------------------------------------------------------------------------------------------------------------------------------------------------------------------------------------------------------------------------------------------------------------------------------------------------------------------------------------------------------------------------------------------------------------------------------------------------------------------------------------------------------------------------------------------------------------------------------------------------------|---------|
|    | OR health OR healthcare OR hearing loss OR helminth* OR hepatitis OR hernia* OR herpe* OR HIV OR hookworm* OR HPV OR hypertension OR illness* OR indigestion* OR infect* OR inflame* OR injur* OR leishmaniasis OR leprosy OR leukaemia OR leukemia OR lice OR life expectancy OR malaria OR malformat* OR malnutrition OR measles OR medical OR melanoma* OR mental* OR migraine OR miscarriage* OR morbidit* OR mortalit* OR muscl* OR myeloma OR nausea OR neuro* OR nutrition* OR onchocerciasis OR osteoarthritis OR osteoporosis OR pain* OR parasite* OR patient care OR physical activ* OR pneumonia OR poison* OR psoriasis OR psychiatric OR psychos* OR rabies OR rape* OR reproductiv* OR rheuma* OR ringworm* OR sarcoma* OR scabies OR schistosomiasis OR schizophren* OR seizure* OR sepsis* OR sexual* OR shock* OR sick* OR smoking OR sore* OR STD* OR stillbirth* OR stress* OR stroke* OR suicid* OR sunburn* OR syndrome* OR syphilis OR TB OR thrombosis OR tobacco OR STI* OR toothache* OR trachoma OR trauma* OR trichuriasis OR trichomoniasis OR trypanosomiasis OR tuberculosis OR tumor* OR tumour* OR ulcer* OR violence OR virus* OR vomit* OR wart* OR well-being OR wellbeing OR worm* OR wound* |         |
| 10 | Accidents [MeSH]                                                                                                                                                                                                                                                                                                                                                                                                                                                                                                                                                                                                                                                                                                                                                                                                                                                                                                                                                                                                                                                                                                                                                                                                                  | 13,047  |
| 11 | Chronic illness [MeSH]                                                                                                                                                                                                                                                                                                                                                                                                                                                                                                                                                                                                                                                                                                                                                                                                                                                                                                                                                                                                                                                                                                                                                                                                            | 27,898  |
| 12 | “Death and Dying” [MeSH]                                                                                                                                                                                                                                                                                                                                                                                                                                                                                                                                                                                                                                                                                                                                                                                                                                                                                                                                                                                                                                                                                                                                                                                                          | 37,732  |
| 13 | Health [MeSH]                                                                                                                                                                                                                                                                                                                                                                                                                                                                                                                                                                                                                                                                                                                                                                                                                                                                                                                                                                                                                                                                                                                                                                                                                     | 239,359 |
| 14 | Health Behavior [MeSH]                                                                                                                                                                                                                                                                                                                                                                                                                                                                                                                                                                                                                                                                                                                                                                                                                                                                                                                                                                                                                                                                                                                                                                                                            | 29,441  |
| 15 | Health Care Delivery [MeSH]                                                                                                                                                                                                                                                                                                                                                                                                                                                                                                                                                                                                                                                                                                                                                                                                                                                                                                                                                                                                                                                                                                                                                                                                       | 93,926  |
| 16 | Health Care Policy [MeSH]                                                                                                                                                                                                                                                                                                                                                                                                                                                                                                                                                                                                                                                                                                                                                                                                                                                                                                                                                                                                                                                                                                                                                                                                         | 11,882  |
| 17 | Health Care Services [MeSH]                                                                                                                                                                                                                                                                                                                                                                                                                                                                                                                                                                                                                                                                                                                                                                                                                                                                                                                                                                                                                                                                                                                                                                                                       | 199,129 |
| 18 | Health Care Utilization [MeSH]                                                                                                                                                                                                                                                                                                                                                                                                                                                                                                                                                                                                                                                                                                                                                                                                                                                                                                                                                                                                                                                                                                                                                                                                    | 15,311  |
| 19 | Infectious disorders [MeSH]                                                                                                                                                                                                                                                                                                                                                                                                                                                                                                                                                                                                                                                                                                                                                                                                                                                                                                                                                                                                                                                                                                                                                                                                       | 60,085  |
| 20 | Injuries [MeSH]                                                                                                                                                                                                                                                                                                                                                                                                                                                                                                                                                                                                                                                                                                                                                                                                                                                                                                                                                                                                                                                                                                                                                                                                                   | 25,738  |
| 21 | Morbidity [MeSH]                                                                                                                                                                                                                                                                                                                                                                                                                                                                                                                                                                                                                                                                                                                                                                                                                                                                                                                                                                                                                                                                                                                                                                                                                  | 7,010   |
| 22 | Neoplasms [MeSH]                                                                                                                                                                                                                                                                                                                                                                                                                                                                                                                                                                                                                                                                                                                                                                                                                                                                                                                                                                                                                                                                                                                                                                                                                  | 49,460  |
| 23 | Nutritional deficiencies [MeSH]                                                                                                                                                                                                                                                                                                                                                                                                                                                                                                                                                                                                                                                                                                                                                                                                                                                                                                                                                                                                                                                                                                                                                                                                   | 3,952   |
| 24 | Parasitic disorders [MeSH]                                                                                                                                                                                                                                                                                                                                                                                                                                                                                                                                                                                                                                                                                                                                                                                                                                                                                                                                                                                                                                                                                                                                                                                                        | 1,068   |
| 25 | Viral disorders [MeSH]                                                                                                                                                                                                                                                                                                                                                                                                                                                                                                                                                                                                                                                                                                                                                                                                                                                                                                                                                                                                                                                                                                                                                                                                            | 50,123  |

|    |                                                                                                                                                                                                                            |           |
|----|----------------------------------------------------------------------------------------------------------------------------------------------------------------------------------------------------------------------------|-----------|
| 26 | 9 OR 10 OR 11 OR 12 OR 13 OR 14 OR 15 OR 16 OR 17 OR 18 OR 19 OR 20 OR 21<br>OR 22 OR 23 OR 24 OR 25                                                                                                                       | 3,211,923 |
|    |                                                                                                                                                                                                                            |           |
| 27 | Malaysia OR Johor OR Kedah OR Kelantan OR Kuala Lumpur OR Labuan OR<br>Malacca OR Melaka OR Malaya OR Negeri Sembilan OR Pahang OR Penang OR Perak<br>OR Perlis OR Putrajaya OR Sabah OR Sarawak OR Selangor OR Terengganu | 3,636     |
| 28 | Malaysian                                                                                                                                                                                                                  | 1,676     |
| 29 | area* OR Borneo OR city OR cities OR district* OR island* OR isle* OR province*<br>OR region* OR state* OR territor* OR village*                                                                                           | 1,025,257 |
| 30 | 28 AND 29                                                                                                                                                                                                                  | 391       |
| 31 | 27 OR 30                                                                                                                                                                                                                   | 3,727     |
|    |                                                                                                                                                                                                                            |           |
| 32 | 8 AND 26 AND 31                                                                                                                                                                                                            | 91        |
|    |                                                                                                                                                                                                                            |           |
| 33 | Animal migration OR bird migration OR cell* OR membrane* OR molecu*                                                                                                                                                        | 184,060   |
| 34 | 32 NOT 33                                                                                                                                                                                                                  | 91        |

## I.6. Social Policy and Practice

|                            |                            |
|----------------------------|----------------------------|
| Database name              | Social Policy and Practice |
| Database search engine     | OvidSP                     |
| Dates of database coverage | N/A                        |
| Date search conducted      | 17 September 2019          |
| Total number of hits       | 5                          |

| # | Searches                                                                                                                                                                                                                                                                                                                                                                                                                                                                                                                                                                                                                                                                                                                                                                                                                                                                                                                                                                                                                                                                                                                                                                                                                                                                                                                                                                                                                                                                                                                                                                                                                                                                                                                           | Results |
|---|------------------------------------------------------------------------------------------------------------------------------------------------------------------------------------------------------------------------------------------------------------------------------------------------------------------------------------------------------------------------------------------------------------------------------------------------------------------------------------------------------------------------------------------------------------------------------------------------------------------------------------------------------------------------------------------------------------------------------------------------------------------------------------------------------------------------------------------------------------------------------------------------------------------------------------------------------------------------------------------------------------------------------------------------------------------------------------------------------------------------------------------------------------------------------------------------------------------------------------------------------------------------------------------------------------------------------------------------------------------------------------------------------------------------------------------------------------------------------------------------------------------------------------------------------------------------------------------------------------------------------------------------------------------------------------------------------------------------------------|---------|
| 1 | asylum* OR displaced OR emigra* OR emigre* OR foreign born OR foreign labor OR foreign labour OR foreign work* OR foreign-born OR foreign-work* OR foreigner* OR immigra* OR migra* OR people of concern OR person of concern OR persons of concern OR refugee* OR smuggl* OR traffick* OR transient* OR transmigrant*                                                                                                                                                                                                                                                                                                                                                                                                                                                                                                                                                                                                                                                                                                                                                                                                                                                                                                                                                                                                                                                                                                                                                                                                                                                                                                                                                                                                             | 10,050  |
| 2 | abnormalit* OR abortion* OR abscess* OR accident* OR ache* OR aids OR ailment* OR alcohol* OR allerg* OR anorexia OR AMR OR antibiotic resistan* OR antimicrobial resistan* OR anxiet* OR allerg* OR apnoea OR arthritis OR ascariasis OR assault* OR asthma OR attack* OR bacteri* OR bipolar OR bite* OR blastoma* OR bleed* OR blind OR blood OR burn* OR cancer* OR cardio* OR Chagas OR chlamydia OR cholesterol OR coma OR complication* OR condition* OR condom* OR contraception OR cyst* OR dead OR deaf OR death* OR decay OR deform* OR dehydrat* OR dementia OR dengue OR depress* OR diabetes OR diarrhoea OR disabilit* OR disease* OR disorder* OR dracunculiasis OR drug* OR dysfunction* OR eczema OR enlargement* OR epilep* OR exhaust* OR failure OR fatal* OR fatigue OR fever* OR filariasis OR flu OR gall stone* gallstone* OR gonorrhea OR headache* OR health OR healthcare OR hearing loss OR helminth* OR hepatitis OR hernia* OR herpe* OR HIV OR hookworm* OR HPV OR hypertension OR illness* OR indigestion* OR infect* OR inflame* OR injur* OR leishmaniasis OR leprosy OR leukaemia OR leukemia OR lice OR life expectancy OR malaria OR malformat* OR malnutrition OR measles OR medical OR melanoma* OR mental* OR migraine OR miscarriage* OR morbidit* OR mortalit* OR muscl* OR myeloma OR nausea OR neuro* OR nutrition* OR onchocerciasis OR osteoarthritis OR osteoporosis OR pain* OR parasite* OR patient care OR physical activ* OR pneumonia OR poison* OR psoriasis OR psychiatric OR psychos* OR rabies OR rape* OR reproductiv* OR rheuma* OR ringworm* OR sarcoma* OR scabies OR schistosomiasis OR schizophren* OR seizure* OR sepsis* OR sexual* OR shock* OR sick* OR smoking | 197,274 |



|    |                                                                                                                                                                                                                                                                                                                                                                              |        |
|----|------------------------------------------------------------------------------------------------------------------------------------------------------------------------------------------------------------------------------------------------------------------------------------------------------------------------------------------------------------------------------|--------|
|    | OR sore* OR STD* OR stillbirth* OR stress* OR stroke* OR suicid* OR sunburn* OR syndrome* OR syphilis OR TB OR thrombosis OR tobacco OR STI* OR toothache* OR trachoma OR trauma* OR trichuriasis OR trichomoniasis OR trypanosomiasis OR tuberculosis OR tumor* OR tumour* OR ulcer* OR violence OR virus* OR vomit* OR wart* OR well-being OR wellbeing OR worm* OR wound* |        |
|    |                                                                                                                                                                                                                                                                                                                                                                              |        |
| 3  | Malaysia OR Johor OR Kedah OR Kelantan OR Kuala Lumpur OR Labuan OR Malacca OR Melaka OR Malaya OR Negeri Sembilan OR Pahang OR Penang OR Perak OR Perlis OR Putrajaya OR Sabah OR Sarawak OR Selangor OR Terengganu                                                                                                                                                         | 113    |
| 4  | Malaysian                                                                                                                                                                                                                                                                                                                                                                    | 21     |
| 5  | area* OR Borneo OR city OR cities OR district* OR island* OR isle* OR province* OR region* OR state* OR territor* OR village*                                                                                                                                                                                                                                                | 92,897 |
| 6  | 4 AND 5                                                                                                                                                                                                                                                                                                                                                                      | 5      |
| 7  | 3 OR 6                                                                                                                                                                                                                                                                                                                                                                       | 114    |
|    |                                                                                                                                                                                                                                                                                                                                                                              |        |
| 8  | 1 AND 2 AND 7                                                                                                                                                                                                                                                                                                                                                                | 5      |
|    |                                                                                                                                                                                                                                                                                                                                                                              |        |
| 9  | Animal migration OR bird migration OR cell* OR membrane* OR molecu*                                                                                                                                                                                                                                                                                                          | 447    |
| 10 | 8 NOT 9                                                                                                                                                                                                                                                                                                                                                                      | 5      |

**I.7. Summary of the identified records**

| <b>Database</b>          | <b>Hits</b>  |
|--------------------------|--------------|
| Econlit                  | 348          |
| Embase                   | 549          |
| Global Health            | 382          |
| Medline                  | 364          |
| PsycInfo                 | 91           |
| Social Policy & Practice | 5            |
| <b>Total</b>             | <b>1,739</b> |

## Supplementary file 3. Modified JBI tool – Randomised controlled trial

### **1. Was true randomisation used for the assignment of participants to treatment groups?**

'Yes' should be selected if the authors mention that randomised allocation of participants was conducted to create the treatment and control group. In addition, the randomising process should be explained and can only be a 'yes' answer if it was a real randomised procedure.

'No' or 'Unclear' should be selected if the randomised procedure is not mentioned nor described.

### **2. Was allocation to treatment groups concealed?**

'Yes' should be selected if the researchers describe the concealed allocation procedure, where the allocating people were not able to know if they allocated the subjects to the treatment group or the control group.

'No' or 'Unclear' should be selected if there was no concealed allocation or if no clear information of the procedure was provided to assess if the allocating people were really prevented from knowing which group the treatment group or control group was.

### **3. Were treatment groups similar at the baseline?**

'Yes' if both groups have similar scores for each characteristic and P-scores are provided. At least age, gender, and the particular outcome of interest should be similar, and a P-value (> 0.05) should be provided for each of these categories in order to select 'yes.'

'No' or 'Unclear' should be selected if the scores of the characteristics differ too much, no P-value is provided, and/or the P-value is smaller than 0.05 for age, gender, and/or outcome of interest.

### **4. Were participants blind to treatment assignment?**

'Yes' should be selected if the researchers describe the blinding procedure of the participants to show that the participants were not able to know if they were selected for the treatment group or the control group.

'No' or 'Unclear' should be selected if there was no blinding of participants or if no clear information of the blinding procedure was provided to assess if the subjects were really prevented from knowing in which group they were in.

1  
2  
3 **5. Were those delivering treatment blind to treatment the assignment?**  
4

5  
6 'Yes' should be selected if the researchers describe the blinding procedure among the  
7 treatment providers, where the treatment providers were not able to know if they provided  
8 the treatment or the placebo to the participants.  
9

10  
11 'No' or 'Unclear' should be selected if there was no blinding procedure among the treatment  
12 providers or if no clear information of the procedure was provided to assess if the treatment  
13 providers were really prevented from knowing who received the treatment and who received  
14 the placebo.  
15

16  
17  
18 **6. Were outcomes assessors blind to treatment assignment?**  
19

20  
21 'Yes' should be selected if the researchers describe the blinding procedure among the  
22 assessors that measured the results, where these people were not able to know in which  
23 group the participants were in.  
24

25  
26 'No' or 'Unclear' should be selected if there was no blinding procedure among the assessors  
27 or if no clear information of the procedure was provided to assess if the assessors were really  
28 prevented from knowing who received the treatment and who received the placebo.  
29

30  
31  
32 **7. Were treatment groups treated identically other than the intervention of interest?**  
33

34  
35 'Yes' should be selected if the researchers describe the exact similar general treatment  
36 procedure for both groups, and that the treatment/intervention is the only differing  
37 component for the treatment group.  
38

39  
40 'No' or 'Unclear' should be selected if the general treatment procedure were different  
41 between the two groups or if the treatment procedure is not well described.  
42

43  
44 **8. Was follow up complete, and if not, were differences between groups in terms of their  
45 follow up adequately described and analysed?**  
46

47  
48 'Yes' should be selected if 'loss to follow up' is mentioned, and if there was a loss to follow  
49 up, the researchers should state at least one reason for losing the participants in the study  
50 and at least one measure that was taken to deal with this issue.  
51

52  
53 'No' or 'Unclear' should be selected if the researchers do not mention anything regarding 'loss  
54 to follow up' or if they do not give at least one reasons why people dropped out nor mention  
55 at least one measure that was taken to deal with the loss of follow up issue.  
56

57  
58 **9. Were participants analysed in the groups to which they were randomised?**  
59  
60

1  
2  
3 'Yes' should be selected if the researchers used the intention-to-treat (ITT) analysis method,  
4 where an analysis was conducted to measure the differences of the participants – regardless  
5 if they were in the treatment group or control group – before and after the trial.  
6  
7

8 'No' or 'Unclear' should be selected if there was no ITT analysis or no clear reported outcomes  
9 of an ITT analysis.  
10  
11

### 12 13 **10. Were outcomes measured in the same way for treatment groups?**

14  
15 'Yes' should be selected if there is a statement that shows that all participants – both from  
16 the intervention and control group – were assessed in the same way.  
17  
18

19 'No' or 'Unclear' should be selected if there is a statement that shows that there was a  
20 difference in measurement between cases and controls.  
21  
22

### 23 24 **11. Were outcomes measured in a reliable way?**

25  
26 'Yes' should be selected if there is a detailed description of how the outcome was measured,  
27 accompanied with a statement regarding the used standardised measurement tool or  
28 academic reference.  
29  
30

31 'No' or 'Unclear' should be selected if there is not a detailed description of how the outcome  
32 was measured and/or if the statement regarding the used standardised measurement tool or  
33 academic reference is lacking.  
34  
35

### 36 37 **12. Was an appropriate statistical analysis used?**

38  
39 'Yes' should be selected if the name of the analysis method is mentioned, and justification is  
40 given why the researchers used this method.  
41  
42

43 'No' or 'Unclear' should be selected if the name of analysis method is not provided or if the  
44 justification for using this particular method is lacking.  
45  
46

### 47 48 **13. Was the trial design appropriate, and any deviations from the standard RCT design** 49 **(individual randomisation, parallel groups) accounted for in the conduct and analysis of the** 50 **trial?** 51

52  
53 'Yes' should be selected if there was individual randomisation. 'Yes' can also be selected if  
54 there was cluster sampling, and the authors mention that weighting adjustment methods –  
55 such as propensity-score – have been used in order to solve quantitative imbalance issues.  
56  
57

58 'No' or 'Unclear' should be selected if a non-individual randomisation method has been used,  
59 and no information was given how the researchers dealt with potential imbalance issues.  
60

## Supplementary file 4. Modified JBI tool – Case control

### **1. Were the groups comparable other than the presence of disease in cases or in the absence of disease in controls?**

'Yes' should be selected if the researchers state that they used an individual matching method and describe how they conducted this individual matching.

'No' or 'Unclear' should be selected if a non-individual matching was applied or if the researchers state that they used individual matching, but the description of the process is lacking.

### **2. Were cases and controls matched appropriately?**

'Yes' should be selected if the researchers state clearly what the source population was, referring to the population where cases and controls were recruited.

'No' or 'Unclear' should be selected if there is no information regarding where the cases and/or control were drawn from.

### **3. Were the same criteria used for the identification of cases and controls?**

'Yes' should be selected if eligibility criteria for both cases and controls were defined.

'No' or 'Unclear' should be selected if the researchers did not define the eligibility criteria for both cases and controls to be included in the study.

### **4. Was exposure measured in a standard, valid, and reliable way?**

'Yes' should be selected if there is a detailed description of how the exposure was measured, accompanied with a statement regarding the used standardised measurement tool or academic reference. In addition, there should be a statement that demonstrates the experience of the involved researcher(s), such as that the researcher was trained or have a background in that particular field or the profession of the researchers is mentioned (e.g. nurse, medical practitioner, microbiologist, etc.)

'No' or 'Unclear' should be selected if there is not a detailed description of how the exposure was measured and/or if the statement regarding the used standardised measurement tool or academic reference is lacking. In addition, 'no/unclear' should be selected if there is no information provided about the involved researchers and their experience.

1  
2  
3 'NA' should be selected if the exposure includes a factor that does not need to be measured  
4 by the researcher (e.g. visa status or location).  
5  
6  
7

8 **5. Was exposure measured in the same way for cases and controls?**  
9

10 'Yes' should be selected if there is a statement that shows that all participants/both cases and  
11 controls were assessed in the same way.  
12

13  
14 'No' or 'Unclear' should be selected if there is a statement that shows that there was a  
15 difference in measurement between cases and controls.  
16  
17

18  
19 **6. Were confounding factors identified?**  
20

21 'Yes' should be selected if the researcher states that confounders (other variables that can  
22 influence the association between a dependent and independent variable) or no confounders  
23 were identified. If a confounder was identified, the researcher should state what the  
24 confounding factor was.  
25  
26

27 'No' or 'Unclear' should be selected if there is no statement regarding potential confounding  
28 issues or if the researcher state that there was a confounder, but does not state what kind of  
29 confounder it was.  
30  
31

32  
33 **7. Were strategies to deal with confounding factors stated?**  
34

35 'Yes' should be selected if a strategy is described how the researchers dealt with the  
36 confounding factor(s)/controlled for other factors. If there is a statement that there were no  
37 confounders, no strategy is needed, and 'yes' can be selected.  
38  
39

40 'No' or 'Unclear' should be selected if no strategy was mentioned or if they only mention that  
41 they controlled for confounders without a detailed description of the methods used to do so.  
42  
43  
44

45  
46 **8. Were outcomes assessed in a standard, valid, and reliable way for cases and controls?**  
47

48 'Yes' should be selected if there is a detailed description of how the outcome was measured,  
49 accompanied with a statement regarding the used standardised measurement tool or  
50 academic reference. In addition, there should be a statement that demonstrates the  
51 experience of the involved researcher(s), such as that the researcher was trained or have a  
52 background in that particular field or the profession of the researchers is mentioned (e.g.  
53 nurse, medical practitioner, microbiologist, etc.)  
54  
55

56 'No' or 'Unclear' should be selected if there is not a detailed description of how the outcome  
57 was measured and/or if the statement regarding the used standardised measurement tool or  
58  
59  
60

1  
2  
3 academic reference is lacking. In addition, 'no/unclear' should be selected if there is no  
4 information provided about the involved researchers and their experience.  
5  
6  
7

8 **9. Was the exposure period of interest long enough to be meaningful?**  
9

10 'Yes' should be selected if justification was given for the X amount of exposure time used in  
11 the study.  
12

13  
14 'No' or 'Unclear' should be selected if no justification was given for the X amount of exposure  
15 time used in the study.  
16  
17

18  
19 **10. Was an appropriate statistical analysis used?**  
20

21 'Yes' should be selected if the name of the analysis method is mentioned and justification is  
22 given why the researchers used this method.  
23  
24

25 'No' or 'Unclear' should be selected if the name of the analysis method is not provided or if  
26 the justification for using this particular method is lacking.  
27  
28  
29  
30  
31  
32  
33  
34  
35  
36  
37  
38  
39  
40  
41  
42  
43  
44  
45  
46  
47  
48  
49  
50  
51  
52  
53  
54  
55  
56  
57  
58  
59  
60



## Supplementary file 5. Modified JBI tool – Analytical cross-sectional

### **1. Were the criteria for inclusion in the sample clearly defined?**

'Yes' should be selected if the researchers make an exclusive statement regarding the inclusion/exclusion criteria to select the participants.

'No' or 'Unclear' should be selected if an exclusive statement concerning the inclusion/exclusion criteria is lacking.

### **2. Were the study subjects and the setting described in detail?**

'Yes' should be selected if different demographic variables are presented in absolute numbers, including age (aggregated in individual years or age categories), sex, and nationality. In addition, the setting should be described by providing the name of the location and/or a description of the location.

'No' or 'Unclear' should be selected if a description regarding age, sex, and/or nationality in absolute numbers are lacking. Note that using only means and ratios will not be sufficient to answer this question, and 'no/unclear' should be selected. In addition, 'no/unclear' should be selected if the name and/or description of the location is not given.

### **3. Was the exposure measured in a valid and reliable way?**

'Yes' should be selected if there is a detailed description of how the exposure was measured, accompanied with a statement regarding the used standardised measurement tool or academic reference. In addition, there should be a statement that demonstrates the experience of the involved researcher(s), such as that the researcher was trained or have a background in that particular field or the profession of the researchers is mentioned (e.g. nurse, medical practitioner, microbiologist, etc.)

'No' or 'Unclear' should be selected if there is not a detailed description of how the exposure was measured and/or if the statement regarding the used standardised measurement tool or academic reference is lacking. In addition, 'no/unclear' should be selected if there is no information provided about the involved researchers and their experience.

'N/A' should be selected if the exposure includes a factor that does not need to be measured by the researcher (e.g. visa status or location).

**NOTE: the following question – 4. Were objective, standard criteria used for measurement of the condition? – has been removed as no distinction between Q4 and Q7 was identified by the PI.**

#### **4. Were confounding factors identified?**

'Yes' should be selected if the researcher states that confounders (other variables that can influence the association between a dependent and independent variable) or no confounders have been identified. If a confounder was identified, the researcher should state what the confounding factor was.

'No' or 'Unclear' should be selected if there is no statement regarding potential confounding issues or if the researcher state that there was a confounder, but does not state what kind of confounder it was.

#### **5. Were strategies to deal with confounding factors stated?**

'Yes' should be selected if a strategy is described how the researchers dealt with the confounding factor(s)/controlled for other factors. If there is a statement that there were no confounders, no strategy is needed, and 'yes' can be selected.

'No' or 'Unclear' should be selected if no strategy was mentioned or if they only mention that they controlled for confounders without a detailed description of the methods used to do so.

#### **6. Were the outcomes measured in a valid and reliable way?**

'Yes' should be selected if there is a detailed description of how the outcome was measured, accompanied with a statement regarding the used standardised measurement tool or academic reference. In addition, there should be a statement that demonstrates the experience of the involved researcher(s), such as that the researcher was trained or have a background in that particular field or the profession of the researchers is mentioned (e.g. nurse, medical practitioner, microbiologist, etc.)

'No' or 'Unclear' should be selected if there is not a detailed description of how the outcome was measured and/or if the statement regarding the used standardised measurement tool or academic reference is lacking. In addition, 'no/unclear' should be selected if there is no information provided about the involved researchers and their experience.

#### **7. Was an appropriate statistical analysis used?**

'Yes' should be selected if the name of the analysis method is mentioned, justification is given why the researchers used this method, and evidence of the applied statistical method is shown (e.g. p-values in the text or tables).

'No' or 'Unclear' should be selected if the name of the analysis method is not provided, a justification for using this particular method is lacking, and/or no evidence is shown regarding the applied statistical method (e.g. such as p-values in the text or tables).

## Supplementary file 6. Modified JBI tool – Prevalence study

### **1. Was the sample frame appropriate to address the target population?**

Here, the sample frame is defined as the source that the participants were drawn from, and the target population is the population that the researcher would like to make a statement about. In order to assess this question, the author should provide a clear research question or study objective, including: 1) a defined population; 2) a specific geographic location or place; and 3) a clear outcome.

‘Yes’ should be selected if the participants from the particular source are in line with the population that the researcher would like to make a statement about.

‘No’ or ‘Unclear’ should be selected if the participants from the particular source are **not** in line with the population that the researcher would like to make a statement about.

### **2. Were study participants sampled in an appropriate way?**

In order to make a judgement, the sampling method should be in line with a clear research question, aim or study objective (see criteria in question 1). If the aim or objective is not present, ‘no/unclear’ should be selected.

‘Yes’ should be selected if one of the two following criteria is met:

1) If the target population refers to a wider population (e.g. to find out the prevalence of a certain disease among the population of an entire country), a random sample should have been taken;

2) if the target population refers to a more specific population (e.g. to find out the prevalence of a certain disease among patients of a specific hospital during a specific time period), consecutive sampling can be used.

‘No’ or ‘Unclear’ should be selected if one of the two criteria above is not met or if information to assess if one of these statements is met is lacking.

### **3. Was the sample size adequate?**

‘Yes’ should be selected if one of the two following criteria is met:

1) if a random sample is taken, the researcher should provide evidence – how the sample size was calculated – that an appropriate sample was used;

1  
2  
3 2) if a consecutive sampling method is used (e.g. all medical records of a specific time period  
4 were screened, and all people that met the inclusion criteria were included), the sample size  
5 can be considered as adequate.  
6  
7

8 'No' or 'Unclear' should be selected if one of the two criteria above is not met or if information  
9 to assess if one of these statements is met is lacking.  
10  
11

#### 12 13 **4. Were the study subjects and the setting described in detail?** 14

15 'Yes' should be selected if different demographic variables are presented, including age  
16 (aggregated in individual years or age categories), sex, and nationality in absolute numbers.  
17 In addition, the setting should be described by providing the name of the location and/or a  
18 description of the location.  
19  
20

21 'No' or 'Unclear' should be selected if a description regarding age, sex, and/or nationality in  
22 absolute numbers are lacking. Note that using only means and ratios will not be sufficient to  
23 answer this question, and 'no/unclear' should be selected. In addition, 'no/unclear' should be  
24 selected if the name and/or description of the location is not given.  
25  
26  
27

#### 28 29 **5. Was the data analysis conducted with sufficient coverage of the identified sample?** 30

31 Here, the variables to assess coverage bias will only include sex, age, and nationality.  
32 The answer to this question depends on the aim of the study and the sampling method. If the  
33 authors used a non-consecutive sampling method and are conducting a subgroup analysis  
34 using inferential statistics – e.g. examining whether an intervention had a differential effect  
35 by nationality – the subgroups being analysed should be roughly the same size. Therefore, all  
36 the previously mentioned demographic variables – sex, age, and nationality – should be  
37 presented in order to make a judgement. If the analysis is purely descriptive, and a  
38 consecutive sampling method is used, unbalanced groups are fine. Therefore, lacking  
39 variables concerning sex, age, and nationality will not result in 'no/unclear' in this question.  
40  
41  
42

43 As a general rule, 'Yes' should be selected if the subgroups of interest are roughly balanced  
44 (the difference between the highest and lowest group is less than 50%). E.g. nationality is  
45 measured for 60 people – 20 Bangladeshi, 19 Indonesians, and 11 Myanmar – the difference  
46 between Bangladeshi and Myanmar is still less than 50%, and, therefore, 'yes' should be  
47 selected. However, if a consecutive sampling method is used (including all the subjects of the  
48 population of interest), the groups do not have to be balanced, and 'yes' should be selected.  
49  
50

51 'No' or 'Unclear' should be selected if an unequal distribution is present, where this includes  
52 a difference of 50% or more between the highest and lowest group. E.g. sex is measured – 12  
53 females and 6 males – the difference is 50%, and, therefore, 'no' should be selected. Also,  
54 select 'no/unclear' if the sampling method and/or the aim of the study is not described unless  
55 the study included a consecutive sampling method.  
56  
57  
58  
59  
60

1  
2  
3 **6. Were valid methods used for the identification of the condition?**  
4

5 'Yes' should be selected if there is a detailed description of how the outcome was measured,  
6 accompanied with a statement regarding the used standardised measurement tool or  
7 academic reference.  
8

9  
10 'No' or 'Unclear' should be selected if there is not a detailed description of how the outcome  
11 was measured and/or if the statement regarding the used standardised measurement tool or  
12 academic reference is lacking.  
13  
14

15  
16  
17 **7. Was the condition measured in a standard, reliable way for all participants?**  
18

19 'Yes' should be selected if there is a statement that demonstrates the experience of the  
20 involved researcher(s), such as that the researcher was trained or have a background in that  
21 particular field or the profession of the researchers is mentioned (e.g. nurse, medical  
22 practitioner, microbiologist, etc.).  
23

24  
25 'No' or 'Unclear' should be selected if there is no information provided about the involved  
26 researchers and their experience.  
27

28 'N/A' should be selected if the used method does not need the involvement of the researcher  
29 to measure the condition (e.g. self-administered questionnaires).  
30  
31

32  
33 **8. Was there an appropriate statistical analysis?**  
34

35 'Yes' should be selected if the numerator and denominator in absolute numbers (relative  
36 numbers are optional) are presented for each variable that was included in the study if the  
37 study was classified as a prevalence study of 'level 3' evidence (purely descriptive). If the study  
38 was classified as a prevalence study of 'level 2' evidence (showing an association/correlation),  
39 the study should mention the name of the analysis method, provide a justification why the  
40 researchers used this analysis method, and show evidence of the applied statistical method  
41 (e.g. p-values in the text or tables).  
42  
43

44  
45 'No' or 'Unclear' should be selected if the numerator and/or denominator – in absolute  
46 numbers – for one or more variables that were included in the study are lacking for a  
47 prevalence study of 'level 3' evidence (purely descriptive). In addition, 'no/unclear' should be  
48 selected if the study was classified as a prevalence study of 'level 2' evidence (showing an  
49 association/correlation), and one or more of the following aspects is lacking: 1) name of the  
50 analysis method; 2) a justification why the researchers used this analysis method; 3) evidence  
51 of the applied statistical method (e.g. p-values in the text or tables).  
52  
53

54  
55  
56 **9. Was the response rate adequate, and if not, was the low response rate managed**  
57 **appropriately?**  
58  
59  
60

1  
2  
3 'Yes' should be selected if there is a statement regarding the response rate and if the response  
4 rate is 75% or more.  
5

6  
7 'No' or 'Unclear' should be selected if there is no statement regarding the response rate or if  
8 the non-response/refusal is more than 25%.  
9

10  
11 'N/A' should be selected if the study included secondary data/medical records, as this kind of  
12 information is generally not available in this type of data.  
13  
14  
15  
16  
17  
18  
19  
20  
21  
22  
23  
24  
25  
26  
27  
28  
29  
30  
31  
32  
33  
34  
35  
36  
37  
38  
39  
40  
41  
42  
43  
44  
45  
46  
47  
48  
49  
50  
51  
52  
53  
54  
55  
56  
57  
58  
59  
60

For peer review only

## Supplementary file 7. Modified JBI tool – Case series

### **1. Were there clear criteria for inclusion in the case series?**

'Yes' should be selected if the researchers made an exclusive statement regarding the inclusion criteria to select the cases or a specific case definition was given.

'No' or 'Unclear' should be selected if an exclusive statement concerning the inclusion and/or exclusion criteria or specific case definition was lacking.

### **2. Was the condition measured in a standard, reliable way for all participants included in the case series?**

'Yes' should be selected if there is a statement that demonstrates the experience of the involved researcher(s), such as that the researcher was trained or have a background in that particular field or the profession of the researchers is mentioned (e.g. nurse, medical practitioner, microbiologist, etc.).

'No' or 'Unclear' should be selected if there is no information provided about the involved researchers and their experience.

### **3. Were valid methods used for identification of the condition for all participants included in the case series?**

'Yes' should be selected if there is a detailed description of how the outcome was measured, accompanied with a statement regarding the used standardised measurement tool or academic reference.

'No' or 'Unclear' should be selected if there is not a detailed description of how the outcome was measured and/or if the statement regarding the used standardised measurement tool or academic reference is lacking.

### **4. Did the case series have consecutive inclusion of participants?**

'Yes' should be selected if the time period is mentioned.

'No' or 'Unclear' should be selected if the time period is not mentioned.

### **5. Did the case series have complete inclusion of participants?**

'Yes' should be selected if there is a clear statement that 'all' cases from the specific time period were included.

1  
2  
3  
4 'No' or 'Unclear' should be selected if the word 'all' is not included in the statement.  
5  
6  
7

8 **6. Was there clear reporting of the demographics of the participants in the study?**  
9

10 'Yes' should be selected if different demographic variables are presented, including age  
11 (aggregated in individual years or age categories), sex, and nationality in absolute numbers.  
12  
13

14 'No' or 'Unclear' should be selected if a description regarding age, sex, and/or nationality in  
15 absolute numbers are lacking. Note that using only means and ratios will not be sufficient to  
16 answer this question, and 'no/unclear' should be selected.  
17  
18

19  
20 **7. Was there clear reporting of clinical information of the participants?**  
21

22 'Yes' should be selected if information on one or more comorbidities, stage of the disease,  
23 results of a diagnostic test, and/or classification of subgroups of the disease is provided. Note  
24 that there should be information available of all the included cases in order to answer 'yes'  
25 to this question.  
26  
27

28 'No' or 'Unclear' should be selected if no information on one or more comorbidities, stage of  
29 the disease, results of a diagnostic test, and/or classification of subgroups of the disease is  
30 provided. In addition, this answer should be selected if information about a certain number  
31 of cases is missing (e.g. if the study includes 100 cases, but the presented clinical information  
32 includes only 25 cases. As clinical information of 75 people is missing, 'no/unclear' should be  
33 selected).  
34  
35  
36  
37

38 **8. Were the outcomes or follow up results of cases clearly reported?**  
39

40 'Yes' should be selected if there is a statement that treatment was provided, what type of  
41 treatment it was, and how many people in relative numbers – benefited from the treatment.  
42  
43

44 'No' or 'Unclear' should be selected if any information was lacking regarding the treatment  
45 that was provided, what type of treatment it was, and how many people in absolute numbers  
46 benefited from the treatment. In addition, 'no/unclear' should be selected if the treatment  
47 statement does not involve the entire case population, but only a certain amount of the cases  
48 (e.g. 24 out of the 60 cases received treatment, but information regarding the other 36 cases  
49 is lacking).  
50  
51  
52  
53

54 **9. Was there clear reporting of the presenting site(s)/clinic(s) demographic information?**  
55

56 'Yes' should be selected if the setting was described by providing the name and/or description  
57 of the location.  
58  
59  
60



1  
2  
3 'No' or 'Unclear' should be selected if there was no description or name of the location.  
4  
5  
6

7 **10. Was the statistical analysis appropriate?**  
8

9 'Yes' should be selected if the numerator and denominator in absolute numbers (relative  
10 numbers are optional) are presented for each variable that was included in the study. All  
11 other statistical methods are optional.  
12

13  
14 'No' or 'Unclear' should be selected if the numerator and/or denominator – in absolute  
15 numbers – for one or more variables that were included in the study are lacking.  
16  
17  
18  
19  
20  
21  
22  
23  
24  
25  
26  
27  
28  
29  
30  
31  
32  
33  
34  
35  
36  
37  
38  
39  
40  
41  
42  
43  
44  
45  
46  
47  
48  
49  
50  
51  
52  
53  
54  
55  
56  
57  
58  
59  
60

For peer review only

## Supplementary file 8. Modified JBI tool – Case report

### **1. Were patient's demographic characteristics clearly described?**

'Yes' should be selected if at least the following three demographic variables are described: sex, age, and nationality.

'No' or 'Unclear' should be selected if information regarding sex, age and/or nationality is lacking.

### **2. Was the patient's history clearly described and presented as a timeline?**

'Yes' should be selected if the case report states when (month and year) and where (the location where the person was at that time) disease/health issue started. In addition, the report should clearly state if the patients did or did not seek previous medical treatment. If the person did seek medical treatment before, the following information should be included: type of treatment, location of the treatment (name/type of clinic and location), and date of treatment (month and year).

'No' or 'Unclear' should be selected if any of the above aspects are lacking in the description of the patient's history.

### **3. Was the current clinical condition of the patient on presentation clearly described?**

'Yes' should be selected if the report includes a description of the symptoms.

'No' or 'Unclear' should be selected if the description of the symptoms is lacking.

### **4. Were diagnostic tests or assessment methods and the results clearly described?**

'Yes' should be selected if a detailed description of how the outcome was measured accompanied with a statement regarding the used standardised measurement tool or academic reference if applicable.

'No' or 'Unclear' should be selected if there is not a detailed description of how the outcome was measured and/or if the statement regarding the used standardised measurement tool or academic reference is lacking.

### **5. Was the intervention or treatment procedure clearly described?**

'Yes' should be selected if a proper description of the treatment is given, including the name of the treatment and the dosage if applicable.

1  
2  
3  
4  
5  
6  
7  
8  
9  
10  
11  
12  
13  
14  
15  
16  
17  
18  
19  
20  
21  
22  
23  
24  
25  
26  
27  
28  
29  
30  
31  
32  
33  
34  
35  
36  
37  
38  
39  
40  
41  
42  
43  
44  
45  
46  
47  
48  
49  
50  
51  
52  
53  
54  
55  
56  
57  
58  
59  
60

'No' or 'Unclear' should be selected if there was no treatment or if the report simply states that a certain drug/treatment was provided without giving specific details.

'N/A' should be selected if the case included a patient that was already found dead before the medical examination/intervention was conducted.

#### **6. Was the post-intervention clinical condition clearly described?**

'Yes' should be selected if the patient's condition regarding the disease/symptoms was described after the treatment/intervention (e.g. the symptoms were gone or reduced).

'No' or 'Unclear' should be selected if the post-intervention clinical condition was not assessed.

'N/A' should be selected if the patient disappeared after the treatment (e.g. due to loss to follow up or death).

#### **7. Were adverse events (harms) or unanticipated events identified and described?**

'Yes' should be selected if there is an explicit statement regarding the side effects – either that there were side effects or there were no side effects (e.g. patient remained well during treatment). If the report states that there were side effects, these symptoms should be described, and information should be provided on how long these side effects were lasting.

'No' or 'Unclear' should be selected if there is no explicit statement regarding the side effects of the treatment or if the report states that side effects were present, but a description of the symptoms and the duration of these symptoms were not given.

'N/A' should be selected if the patient disappeared after the treatment (e.g. due to loss to follow up or death).

#### **8. Does the case report provide takeaway lessons?**

'Yes' should be selected if the author provides a statement regarding any of the following three elements: 1) future plan of action to cure, prevent, reduce or control the particular disease; 2) treatment advice for the particular disease; 3) future research regarding the particular disease.

'No' or 'Unclear' should be selected if there is no takeaway lesson or if the takeaway lesson does not include one of the three elements mentioned above.

## Supplementary file 9. Modified JBI tool – Qualitative study

### **1. Is there congruity between the stated philosophical perspective and the research methodology?**

'Yes' should be selected if a clear philosophical or theoretical perspective/framework, and there is an explanation of how the selected qualitative method could be useful within this perspective/framework.

'No' or 'Unclear' should be selected if no clear philosophical or theoretical perspective is given or if the researcher does not explain how the used qualitative methods fit within this framework.

### **2. Is there congruity between the research methodology and the research questions or objectives?**

'Yes' should be selected if the objective/research question is more exploratory and focuses more on obtaining an in-depth understanding of why the particular social phenomenon is happening.

'No' or 'Unclear' should be selected if the objective/research question is more conclusive and focuses more on what within a social phenomenon is happening.

### **3. Is there congruity between the research methodology and the methods used to collect data?**

'Yes' should be selected if a qualitative method was used to collect the data, such as interviews and focus group discussions.

'No' or 'Unclear' should be selected if the method is not described or if a quantitative method was applied, such as a survey questionnaire.

### **4. Is there congruity between the research methodology and the representation and analysis of data?**

'Yes' should be selected if a qualitative analysis is used (e.g. thematic analysis) and shows evidence that different voices were represented (e.g. using quotes from different individuals).

'No' or 'Unclear' should be selected if a quantitative analysis has been used (e.g. a simple descriptive presentation of the data) and/or evidence regarding the representation of different voices were lacking.

1  
2  
3  
4 **5. Is there congruity between the research methodology and the interpretation of results?**  
5  
6

7 'Yes' should be selected if the interpretation of the results is in line with the provided quotes.  
8

9 'No' or 'Unclear' should be selected if the interpretation of the results is not in line with the  
10 given quotes or if the quotes are not provided (lack of evidence to assess if the interpretation  
11 of results and data are aligned.  
12  
13

14  
15 **6. Is there a statement locating the researcher culturally or theoretically?**  
16  
17

18 'Yes' should be selected if there is a statement where the involved researchers are coming  
19 from in terms of cultural and/or theoretical background.  
20

21 'No' or 'Unclear' should be selected if there is no statement regarding the researchers'  
22 cultural or theoretical background.  
23  
24

25  
26 **7. Is the influence of the researcher on the research, and vice-versa, addressed?**  
27  
28

29 'Yes' should be selected if there is at least one statement regarding how the researcher could  
30 have influenced the research and if at least one strategy is given to deal with this issue.  
31

32 'No' or 'Unclear' should be selected if no statement and/or strategy has been given to deal  
33 with the "researcher's influence" issue.  
34  
35

36  
37 **8. Are participants, and their voices, adequately represented?**  
38  
39

40 'Yes' should be selected if there is evidence – such as quotes – of different people, where  
41 these quotes come from at least half of the total number of participants. For instance, if ten  
42 people have been interviewed, quotes from at least five different people – marked by initials,  
43 nicknames, or short descriptions of the interviewees – are shown. In addition, the number of  
44 these quotes among these people should be divided fairly equal as well  
45

46 'No' or 'Unclear' should be selected if there is no (sufficient) evidence to show that the voices  
47 are represented equally. For example, if 20 quotes are selected from ten participants, but 12  
48 of these quotes are from two participants, 'no/unclear' should be selected.  
49  
50

51  
52  
53 **9. Is the research ethical according to current criteria or, for recent studies, and is there  
54 evidence of ethical approval by an appropriate body?**  
55  
56

57 'Yes' should be selected if there is a statement that shows that ethics have been obtained by  
58 a certain ethics committee.  
59  
60

1  
2  
3 'No' or 'Unclear' should be selected if there is no statement that shows that ethics have been  
4 obtained by a certain ethics committee.  
5  
6  
7

8 **10. Do the conclusions drawn in the research report flow from the analysis, or**  
9 **interpretation, of the data?**  
10

11 'Yes' should be selected if at least one conclusion is based on the results of the study.  
12  
13

14 'No' or 'Unclear' should be selected if not one conclusion is based on the results of the study.  
15  
16  
17  
18  
19  
20  
21  
22  
23  
24  
25  
26  
27  
28  
29  
30  
31  
32  
33  
34  
35  
36  
37  
38  
39  
40  
41  
42  
43  
44  
45  
46  
47  
48  
49  
50  
51  
52  
53  
54  
55  
56  
57  
58  
59  
60

For peer review only

## Supplementary file 10. Individual scores of the quality assessment

| No. | Reference                       | Study design               | Level of evidence | Answer to the quality appraisal question |   |     |   |   |     |     |   |     |    |    |    |    | Total score | Score in percentage | Quality of the study |
|-----|---------------------------------|----------------------------|-------------------|------------------------------------------|---|-----|---|---|-----|-----|---|-----|----|----|----|----|-------------|---------------------|----------------------|
|     |                                 |                            |                   | 1                                        | 2 | 3   | 4 | 5 | 6   | 7   | 8 | 9   | 10 | 11 | 12 | 13 |             |                     |                      |
| 1   | Scheutz et al <sup>26</sup>     | Prevalence                 | Des-3             | V                                        | X | X   | V | V | V   | V   | X | X   | -  | -  | -  | -  | 5/9         | 55.6                | Moderate             |
| 2   | Levy <sup>27</sup>              | Prevalence                 | Des-2             | X                                        | X | V   | X | V | V   | X   | X | V   | -  | -  | -  | -  | 4/9         | 44.4                | Low                  |
| 3   | Kassim et al <sup>28</sup>      | Case series                | Des-3             | X                                        | V | X   | V | X | V   | V   | X | V   | V  | -  | -  | -  | 6/10        | 60.0                | Moderate             |
| 4   | Zulkifli et al <sup>29</sup>    | Analytical cross-sectional | Obs-4             | X                                        | X | N/A | V | V | X   | X   | - | -   | -  | -  | -  | -  | 2/6         | 33.3                | Low                  |
| 5   | Rajeswari et al <sup>30</sup>   | Prevalence                 | Des-3             | X                                        | X | X   | V | X | V   | X   | X | X   | -  | -  | -  | -  | 2/9         | 22.2                | Low                  |
| 6   | Jeyakumar <sup>31</sup>         | Case series                | Des-3             | X                                        | X | X   | V | X | X   | X   | V | V   | V  | -  | -  | -  | 4/10        | 40.0                | Low                  |
| 7   | Jamaiah et al <sup>32</sup>     | Case series                | Des-3             | X                                        | X | X   | V | V | X   | X   | X | V   | V  | -  | -  | -  | 4/10        | 40.0                | Low                  |
| 8   | Krahl & Hashim <sup>33</sup>    | Prevalence                 | Des-3             | V                                        | V | V   | X | V | V   | V   | V | X   | -  | -  | -  | -  | 7/9         | 77.8                | High                 |
| 9   | Zabedah et al <sup>34</sup>     | Prevalence                 | Des-2             | X                                        | X | X   | X | V | V   | X   | X | X   | -  | -  | -  | -  | 2/9         | 22.2                | Low                  |
| 10  | Dony et al <sup>35</sup>        | Prevalence                 | Des-3             | V                                        | V | V   | X | V | X   | X   | V | N/A | -  | -  | -  | -  | 5/8         | 62.5                | Moderate             |
| 11  | Chandran et al <sup>36</sup>    | Case report                | Des-4             | V                                        | X | V   | V | V | N/A | N/A | V | -   | -  | -  | -  | -  | 5/6         | 83.3                | High                 |
| 12  | Nissapatorn et al <sup>37</sup> | Prevalence                 | Des-3             | X                                        | X | V   | X | V | V   | X   | V | N/A | -  | -  | -  | -  | 4/8         | 50.0                | Low                  |
| 13  | Sobri et al <sup>38</sup>       | Case series                | Des-3             | X                                        | V | V   | V | V | X   | X   | X | V   | X  | -  | -  | -  | 5/10        | 50.0                | Low                  |
| 14  | Leong <sup>39</sup>             | Prevalence                 | Des-3             | V                                        | X | X   | X | X | V   | V   | V | X   | -  | -  | -  | -  | 4/9         | 44.4                | Low                  |
| 15  | Sasidharan et al <sup>40</sup>  | Prevalence                 | Des-2             | V                                        | V | V   | X | V | V   | V   | V | X   | -  | -  | -  | -  | 7/9         | 77.8                | High                 |

|    |                                       |                            |        |   |   |     |   |     |     |     |     |   |   |   |   |   |      |      |          |
|----|---------------------------------------|----------------------------|--------|---|---|-----|---|-----|-----|-----|-----|---|---|---|---|---|------|------|----------|
| 16 | Masitah et al <sup>41</sup>           | Case series                | Des-3  | V | X | X   | X | X   | X   | V   | X   | X | X | - | - | - | 2/9  | 22.2 | Low      |
| 17 | Shailendra & Prepageran <sup>42</sup> | Case report                | Des-4  | V | X | V   | V | V   | V   | X   | V   | - | - | - | - | - | 6/8  | 75.0 | High     |
| 18 | Chan et al <sup>43</sup>              | Analytical cross-sectional | Obs-4  | X | X | N/A | X | X   | X   | X   | -   | - | - | - | - | - | 0/6  | 0.0  | Low      |
| 19 | Farhana et al <sup>44</sup>           | Case series                | Des-3  | X | X | X   | V | V   | V   | V   | X   | V | V | - | - | - | 6/10 | 60.0 | Low      |
| 20 | Chan et al <sup>45</sup>              | Analytical cross-sectional | Obs-4  | X | X | N/A | X | X   | X   | X   | -   | - | - | - | - | - | 0/6  | 0.0  | Low      |
| 21 | Murty <sup>46</sup>                   | Case report                | Des-4  | V | V | V   | V | N/A | N/A | N/A | X   | - | - | - | - | - | 4/5  | 80.0 | High     |
| 22 | Murty et al <sup>47</sup>             | Case series                | Des-3  | X | X | X   | V | X   | X   | V   | N/A | V | V | - | - | - | 4/9  | 44.4 | Low      |
| 23 | Mustafa et al <sup>48</sup>           | Prevalence                 | Des-2  | V | X | X   | X | X   | V   | V   | V   | X | - | - | - | - | 4/9  | 44.4 | Low      |
| 24 | Su et al <sup>49</sup>                | Analytical cross-sectional | Obs-4  | V | X | V   | X | X   | V   | V   | -   | - | - | - | - | - | 4/7  | 57.1 | Moderate |
| 25 | Daher et al <sup>50</sup>             | Prevalence                 | Des-2  | V | V | X   | V | X   | V   | N/A | V   | V | - | - | - | - | 6/8  | 75.0 | High     |
| 26 | Ratnasingam et al <sup>51</sup>       | Prevalence                 | Des-2  | X | X | X   | X | X   | X   | X   | V   | X | - | - | - | - | 1/9  | 11.1 | Low      |
| 27 | Ab Rahman & Abdullah <sup>52</sup>    | Case report                | Des-4  | V | V | V   | V | V   | V   | X   | V   | - | - | - | - | - | 7/8  | 87.5 | High     |
| 28 | Taib & Baba <sup>53</sup>             | Case series                | Des-3  | X | X | X   | V | X   | X   | V   | X   | V | X | - | - | - | 3/10 | 30.0 | Low      |
| 29 | Osman et al <sup>54</sup>             | Prevalence                 | Des-3  | X | X | X   | V | X   | V   | N/A | V   | V | - | - | - | - | 4/8  | 50.0 | Low      |
| 30 | Minhat et al <sup>55</sup>            | Prevalence                 | Des-2  | X | X | X   | X | X   | V   | N/A | X   | V | - | - | - | - | 2/8  | 25.0 | Low      |
| 31 | Mendelsohn et al <sup>56</sup>        | Qualitative                | Qual-2 | V | V | V   | V | V   | X   | V   | V   | V | V | - | - | - | 9/10 | 90.0 | High     |
| 32 | Mendelsohn et al <sup>57</sup>        | Analytical cross-sectional | Obs-4  | V | V | N/A | V | V   | X   | V   | -   | - | - | - | - | - | 5/6  | 83.3 | High     |



|    |                                 |                            |       |   |   |     |   |   |   |   |   |     |   |   |   |   |      |      |          |
|----|---------------------------------|----------------------------|-------|---|---|-----|---|---|---|---|---|-----|---|---|---|---|------|------|----------|
| 33 | Kwan et al <sup>58</sup>        | Case series                | Des-3 | X | V | X   | V | X | X | V | X | X   | V | - | - | - | 4/10 | 40.0 | Low      |
| 34 | Santos et al <sup>59</sup>      | Prevalence                 | Des-3 | X | X | X   | X | V | V | V | V | V   | - | - | - | - | 5/9  | 55.6 | Moderate |
| 35 | Razali et al <sup>60</sup>      | Case series                | Des-3 | V | V | V   | V | X | V | V | X | V   | V | - | - | - | 8/10 | 80.0 | High     |
| 36 | Elmi et al <sup>61</sup>        | Case control               | Obs-3 | X | V | V   | X | V | X | V | X | X   | V | - | - | - | 5/10 | 50.0 | Low      |
| 37 | Santos et al <sup>62</sup>      | Prevalence                 | Des-2 | X | X | X   | X | V | V | V | X | V   | - | - | - | - | 4/9  | 44.4 | Low      |
| 38 | William et al <sup>63</sup>     | Prevalence                 | Des-2 | V | V | V   | X | V | V | V | V | X   | - | - | - | - | 7/9  | 77.8 | High     |
| 39 | Siah et al <sup>64</sup>        | Prevalence                 | Des-2 | X | X | X   | X | X | V | X | X | X   | - | - | - | - | 1/9  | 11.1 | Low      |
| 40 | Guinto et al <sup>65</sup>      | Scoping review             | -     | - | - | -   | - | - | - | - | - | -   | - | - | - | - | -    | -    | -        |
| 41 | Vijian et al <sup>66</sup>      | Analytical cross-sectional | Obs-4 | V | X | N/A | X | X | X | X | - | -   | - | - | - | - | 1/6  | 16.7 | Low      |
| 42 | Azian et al <sup>67</sup>       | Prevalence                 | Des-2 | X | X | X   | X | X | V | X | X | X   | - | - | - | - | 1/9  | 11.1 | Low      |
| 43 | Sahimin et al <sup>68</sup>     | Prevalence                 | Des-2 | X | X | X   | X | X | V | V | V | X   | - | - | - | - | 3/9  | 33.3 | Low      |
| 44 | Noh et al <sup>69</sup>         | Prevalence                 | Des-2 | X | X | X   | X | X | V | X | V | X   | - | - | - | - | 2/9  | 22.2 | Low      |
| 45 | Kamaludin & How <sup>70</sup>   | Analytical cross-sectional | Obs-4 | V | X | N/A | X | X | V | V | - | -   | - | - | - | - | 3/6  | 50.0 | Low      |
| 46 | Min et al <sup>71</sup>         | Prevalence                 | Des-3 | V | V | V   | X | V | X | X | V | N/A | - | - | - | - | 5/8  | 62.5 | Moderate |
| 47 | Woh et al <sup>72</sup>         | Prevalence                 | Des-3 | X | X | X   | V | V | V | X | V | X   | - | - | - | - | 4/9  | 44.4 | Low      |
| 48 | Tanabe et al <sup>73</sup>      | Mixed method               | -     | - | - | -   | - | - | - | - | - | -   | - | - | - | - | -    | -    | -        |
| 49 | Ratnalingam et al <sup>74</sup> | Prevalence                 | Des-2 | V | X | X   | X | V | V | X | X | X   | - | - | - | - | 3/9  | 33.3 | Low      |

|    |                                |                             |        |   |   |   |   |   |   |   |   |   |   |   |   |   |      |      |          |
|----|--------------------------------|-----------------------------|--------|---|---|---|---|---|---|---|---|---|---|---|---|---|------|------|----------|
| 50 | Woh et al <sup>75</sup>        | Prevalence                  | Des-2  | X | X | X | X | X | V | X | V | X | - | - | - | - | 2/9  | 22.2 | Low      |
| 51 | Noor & Shaker <sup>76</sup>    | Analytical cross-sectional  | Obs-4  | V | X | V | V | V | V | V | - | - | - | - | - | - | 6/7  | 85.7 | High     |
| 52 | Noordin et al <sup>77</sup>    | Prevalence                  | Des-3  | X | X | X | X | V | V | X | V | X | - | - | - | - | 3/9  | 33.3 | Low      |
| 53 | Sahimin et al <sup>78</sup>    | Prevalence                  | Des-2  | X | X | X | V | X | V | V | V | X | - | - | - | - | 4/9  | 44.4 | Low      |
| 54 | Labao et al <sup>79</sup>      | Prevalence                  | Des-3  | X | X | X | X | V | V | V | V | V | - | - | - | - | 5/9  | 55.6 | Moderate |
| 55 | Shaw et al <sup>80</sup>       | Randomised controlled trial | Exp-2  | X | X | X | X | X | X | X | X | V | V | V | V | X | 4/13 | 30.8 | Low      |
| 56 | Rahman et al <sup>81</sup>     | Case control                | Obs-3  | X | V | V | X | V | X | V | X | V | V | - | - | - | 6/10 | 60.0 | Moderate |
| 57 | Sahimin et al <sup>82</sup>    | Prevalence                  | Des-2  | X | X | X | V | X | V | V | V | X | - | - | - | - | 4/9  | 44.4 | Low      |
| 58 | Nwabichie et al <sup>83</sup>  | Prevalence                  | Des-2  | V | V | X | X | V | V | V | V | V | - | - | - | - | 7/9  | 77.8 | High     |
| 59 | Jeffree et al <sup>84</sup>    | Case control                | Obs-3  | X | V | V | X | V | X | X | V | V | V | - | - | - | 6/10 | 60.0 | Moderate |
| 60 | Zerguine et al <sup>85</sup>   | Analytical cross-sectional  | Obs-4  | X | V | V | X | X | V | V | - | - | - | - | - | - | 4/7  | 57.1 | Moderate |
| 61 | Ya'acob et al <sup>86</sup>    | Randomised controlled Trial | Exp-2  | X | X | V | X | X | X | V | X | X | V | V | V | X | 5/13 | 38.5 | Low      |
| 62 | Chuah et al <sup>10</sup>      | Qualitative                 | Qual-2 | V | V | V | V | V | X | V | X | V | V | - | - | - | 8/10 | 80.0 | High     |
| 63 | Loganathan et al <sup>87</sup> | Qualitative                 | Qual-2 | X | V | V | V | V | X | V | V | V | V | - | - | - | 8/10 | 80.0 | High     |
| 64 | Rahman et al <sup>88</sup>     | Prevalence                  | Des-3  | X | X | X | X | V | X | X | V | V | - | - | - | - | 3/9  | 33.3 | Low      |
| 65 | Siah et al <sup>89</sup>       | Qualitative                 | Qual-3 | X | V | X | V | V | X | X | X | V | V | - | - | - | 5/10 | 50.0 | Low      |
| 66 | Sahimin et al <sup>90</sup>    | Prevalence                  | Des-2  | X | X | X | V | X | V | X | V | X | - | - | - | - | 3/9  | 33.3 | Low      |

|    |                           |             |        |   |   |   |   |   |   |   |   |   |   |   |   |   |      |      |      |
|----|---------------------------|-------------|--------|---|---|---|---|---|---|---|---|---|---|---|---|---|------|------|------|
| 67 | Chuah et al <sup>91</sup> | Qualitative | Qual-2 | V | V | V | V | V | X | V | X | V | V | - | - | - | 8/10 | 80.0 | High |
|----|---------------------------|-------------|--------|---|---|---|---|---|---|---|---|---|---|---|---|---|------|------|------|

1  
2  
3  
4  
5  
6  
7  
8  
9  
10  
11  
12  
13  
14  
15  
16  
17  
18  
19  
20  
21  
22  
23  
24  
25  
26  
27  
28  
29  
30  
31  
32  
33  
34  
35  
36  
37  
38  
39  
40  
41  
42  
43  
44  
45  
46

For peer review only

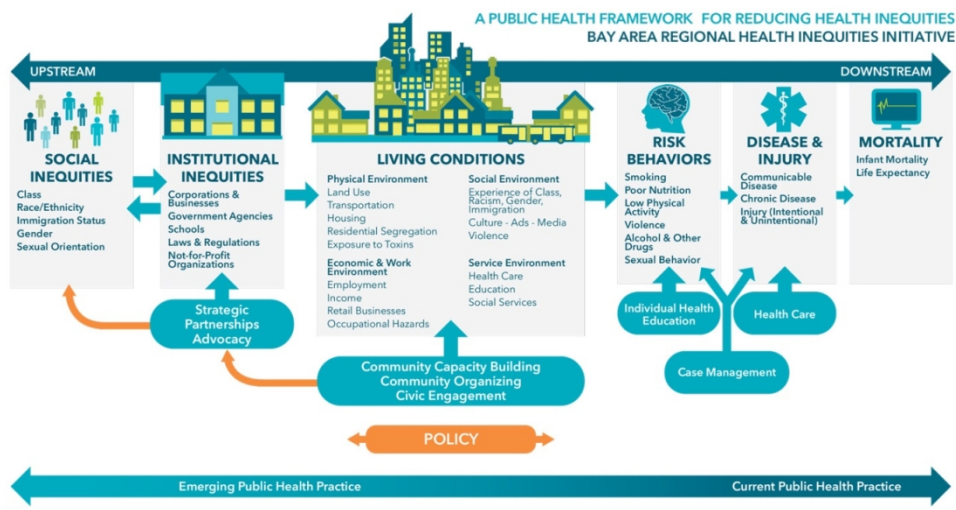

Figure 1. Bay Area Regional Health Inequities Initiative (BARHII) framework.

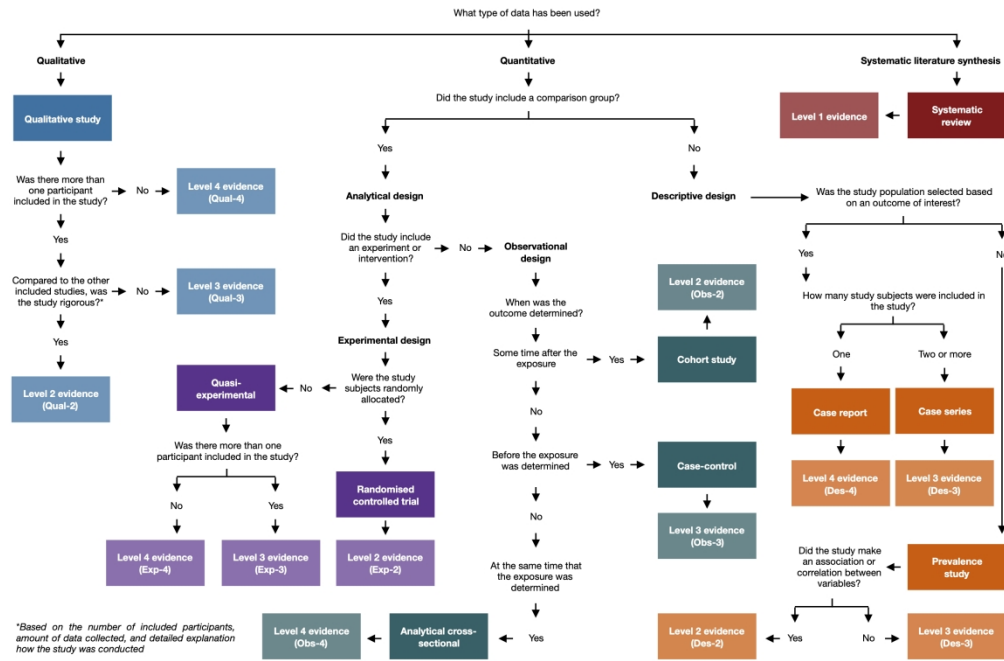

Figure 2. Decision tree to identify the type of study design and corresponding level of evidence.

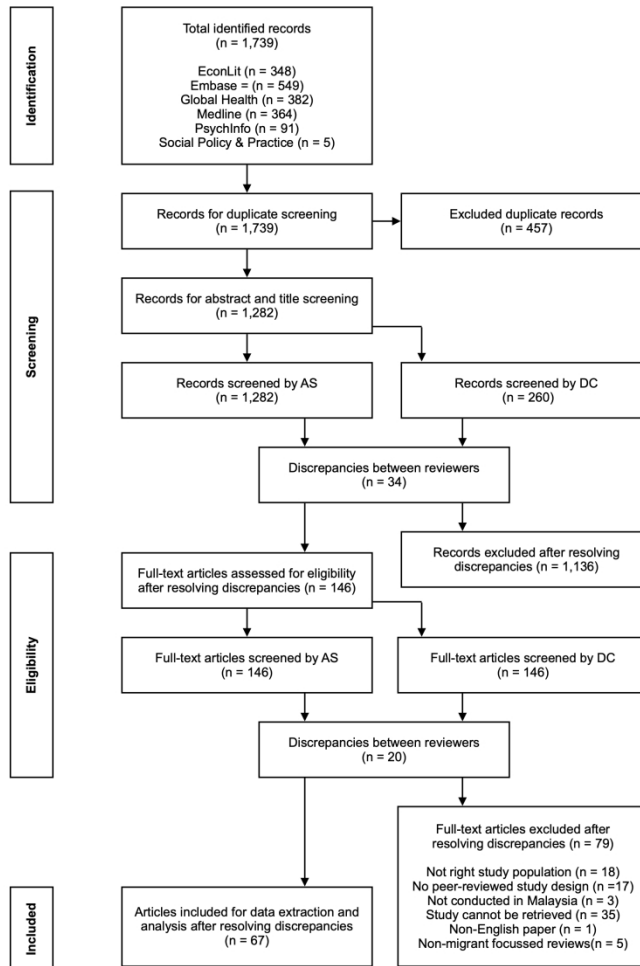

Figure 3. Flowchart of the data selection process.

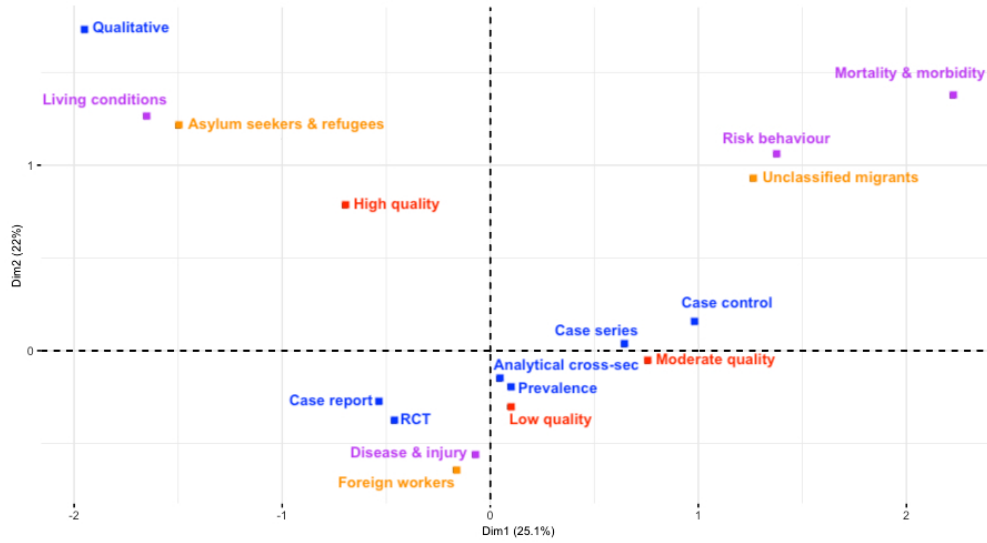

Figure 4. Results of the multiple-correspondence analysis (MCA).

317x173mm (72 x 72 DPI)

# BMJ Open

## Developing an evidence assessment framework and appraising the academic literature on migrant health in Malaysia: a scoping review

|                                 |                                                                                                                                                                                                                                                                                                                                                                                                                                                                                                                                                                                           |
|---------------------------------|-------------------------------------------------------------------------------------------------------------------------------------------------------------------------------------------------------------------------------------------------------------------------------------------------------------------------------------------------------------------------------------------------------------------------------------------------------------------------------------------------------------------------------------------------------------------------------------------|
| Journal:                        | <i>BMJ Open</i>                                                                                                                                                                                                                                                                                                                                                                                                                                                                                                                                                                           |
| Manuscript ID                   | bmjopen-2020-041379.R1                                                                                                                                                                                                                                                                                                                                                                                                                                                                                                                                                                    |
| Article Type:                   | Original research                                                                                                                                                                                                                                                                                                                                                                                                                                                                                                                                                                         |
| Date Submitted by the Author:   | 22-Oct-2020                                                                                                                                                                                                                                                                                                                                                                                                                                                                                                                                                                               |
| Complete List of Authors:       | de Smalen, Allard; United Nations University-Maastricht Economic and Social Research Institute on Innovation and Technology; Maastricht University<br>Chan, Zhie; United Nations University - International Institute for Global Health (UNU-IIGH)<br>Abreu Lopes, Claudia; United Nations University International Institute for Global Health<br>Vanore, Michaella; United Nations University-Maastricht Economic and Social Research Institute on Innovation and Technology; Maastricht University<br>Loganathan, Tharani; University of Malaya<br>Pocock, Nicola S.; London Sch Hyg , |
| <b>Primary Subject Heading</b>: | Global health                                                                                                                                                                                                                                                                                                                                                                                                                                                                                                                                                                             |
| Secondary Subject Heading:      | Research methods, Public health                                                                                                                                                                                                                                                                                                                                                                                                                                                                                                                                                           |
| Keywords:                       | STATISTICS & RESEARCH METHODS, PUBLIC HEALTH, HEALTH SERVICES ADMINISTRATION & MANAGEMENT                                                                                                                                                                                                                                                                                                                                                                                                                                                                                                 |
|                                 |                                                                                                                                                                                                                                                                                                                                                                                                                                                                                                                                                                                           |

SCHOLARONE™  
Manuscripts



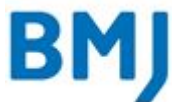

I, the Submitting Author has the right to grant and does grant on behalf of all authors of the Work (as defined in the below author licence), an exclusive licence and/or a non-exclusive licence for contributions from authors who are: i) UK Crown employees; ii) where BMJ has agreed a CC-BY licence shall apply, and/or iii) in accordance with the terms applicable for US Federal Government officers or employees acting as part of their official duties; on a worldwide, perpetual, irrevocable, royalty-free basis to BMJ Publishing Group Ltd ("BMJ") its licensees and where the relevant Journal is co-owned by BMJ to the co-owners of the Journal, to publish the Work in this journal and any other BMJ products and to exploit all rights, as set out in our [licence](#).

The Submitting Author accepts and understands that any supply made under these terms is made by BMJ to the Submitting Author unless you are acting as an employee on behalf of your employer or a postgraduate student of an affiliated institution which is paying any applicable article publishing charge ("APC") for Open Access articles. Where the Submitting Author wishes to make the Work available on an Open Access basis (and intends to pay the relevant APC), the terms of reuse of such Open Access shall be governed by a Creative Commons licence – details of these licences and which [Creative Commons](#) licence will apply to this Work are set out in our licence referred to above.

Other than as permitted in any relevant BMJ Author's Self Archiving Policies, I confirm this Work has not been accepted for publication elsewhere, is not being considered for publication elsewhere and does not duplicate material already published. I confirm all authors consent to publication of this Work and authorise the granting of this licence.

TITLE

1  
2  
3  
4  
5 1 **Developing an evidence assessment framework and**  
6  
7  
8  
9 2 **appraising the academic literature on migrant**  
10  
11  
12 3 **health in Malaysia: a scoping review**  
13  
14  
15  
16 4

17  
18 5 Allard W. de Smalen<sup>1, 2, 3</sup>, Zhie X. Chan<sup>3</sup>, Claudia A. Lopes<sup>3</sup>, Michaella Vanore<sup>1, 2</sup>, Tharani  
19  
20 6 Loganathan<sup>4</sup>, Nicola S. Pocock<sup>3, 5</sup>.  
21  
22  
23 7

24  
25 8 <sup>1</sup>Maastricht Graduate School of Governance, Maastricht University, Maastricht, The  
26  
27 9 Netherlands.  
28

29  
30 10 <sup>2</sup>United Nations University - Maastricht Economic and Social Research Institute on  
31  
32 11 Innovation and Technology (UNU-MERIT), Maastricht, The Netherlands.  
33

34  
35 12 <sup>3</sup>United Nations University - International Institute for Global Health (UNU-IIGH), Kuala  
36  
37 13 Lumpur, Malaysia.  
38

39  
40 14 <sup>4</sup>Centre for Epidemiology and Evidence-based Practice, Department of Social and Preventive  
41  
42 15 Medicine, University of Malaya, Kuala Lumpur, Malaysia  
43

44  
45 16 <sup>5</sup>Gender Violence & Health Centre, London School of Hygiene and Tropical Medicine,  
46  
47 17 London, United Kingdom.  
48

49  
50 18 Allard W. de Smalen (corresponding author)  
51

52  
53 19 E-mail: [allarddesmalen@gmail.com](mailto:allarddesmalen@gmail.com)  
54

55  
56 20 Word count: 6736  
57  
58  
59  
60

## ABSTRACT

**Abstract**

**Background:** A large number of international migrants in Malaysia face challenges in procuring proper health, the extent of which is still relatively unknown. This study aims to map the existing academic literature on migrant health in Malaysia and to provide an overview of the quality and level of evidence of these scientific studies.

**Methods:** A scoping review was conducted using six databases, including Econlit, Embase, Global Health, Medline, PsycInfo, and Social Policy and Practice. Studies were eligible for inclusion if they were conducted in Malaysia, peer-reviewed, focused on a health dimension according to the Bay Area Regional Health Inequities Initiative (BARHII) framework, and targeted the vulnerable international migrant population. Data were extracted by using the BARHII framework and a self-developed decision tree to identify the type of study design and corresponding level of evidence. Modified Joanna Briggs Institute (JBI) checklists were used to assess study quality, and a multiple-correspondence analysis (MCA) was conducted to identify associations between different variables.

**Results:** 67 publications met the selection criteria and were included in the study. The majority (n=41) of studies included foreign workers. Over two-thirds (n=46) focused on disease and injury, and a similar number (n=46) had descriptive designs. The average quality of the papers was low, yet quality differed significantly between research designs and health dimensions. The MCA showed that high-quality studies were mostly qualitative designs that included refugees and focused on living conditions, while prevalence and analytical cross-sectional studies were mostly low quality.

## ABSTRACT

1  
2  
3 43 **Conclusion:** This study provides an overview of the scientific literature on migrant health in  
4  
5 44 Malaysia. In general, the quality of these studies is low, and various health dimensions (e.g.,  
6  
7 45 institutional inequities, mortality and morbidity) have not been thoroughly researched.  
8  
9 46 Therefore, researchers should address these issues to improve the evidence base to support  
10  
11 47 policymakers with high-quality evidence for decision-making.  
12  
13  
14

15 48 **Key Words:** Malaysia, migrant, health, refugee, foreign worker, disease, evidence  
16  
17  
18 49 assessment framework  
19  
20  
21  
22  
23  
24  
25  
26  
27  
28  
29  
30  
31  
32  
33  
34  
35  
36  
37  
38  
39  
40  
41  
42  
43  
44  
45  
46  
47  
48  
49  
50  
51  
52  
53  
54  
55  
56  
57  
58  
59  
60

## ABSTRACT

**Article summary****Strengths and limitations of this study**

- This study provides a comprehensive overview of migrant health research in Malaysia, including a summary table, critical assessment tables, and a multiple-correspondence analysis (MCA).
- Methodological contributions by creating an evidence assessment framework, including a decision tree that identifies the type of study design and corresponding level of evidence, and modified Joanna Briggs Institute (JBI) checklists.
- Exclusive focus on vulnerable migrants within the non-citizen population in Malaysia.
- Only English peer-reviewed academic articles were included in this study, and, therefore, much relevant information that could potentially be used to inform both policies and practice may have been excluded from this review.

## 62 Introduction

63 Worldwide, the international migrant population accounts for approximately 272 million  
64 people, with almost one-third within Asia.<sup>1</sup> Due to its strategic geographic location and high  
65 labour demand, Malaysia is among the top destination countries for international migrants in  
66 the Asian region.<sup>2</sup> According to the Department of Statistics Malaysia (DOSM), the  
67 documented non-citizen population represented 3.2 million people in 2019, which accounts  
68 for 10% of Malaysia's total population.<sup>3</sup> DOSM defines a non-citizen as a person that resides  
69 in Malaysia for six months or more in the reference year.<sup>4</sup> However, no subcategories were  
70 included in this definition. According to the Office of the United Nations High Commissioner  
71 for Human Rights (OHCHR), a non-citizen is an individual that does not have an effective  
72 connection with the location where the person is situated according to the host nation, and  
73 includes various types of migrants, such as foreigners with permanent residency, refugees,  
74 asylum seekers, foreign labour, international students, stateless individuals, and victims of  
75 human trafficking.<sup>5</sup> Other definitions of migrant-related terms that are used in this paper are  
76 presented in Table 1.

77  
78 [INSERT TABLE 1]

79  
80 The vast majority of non-citizens in Malaysia are migrant workers, where foreign labour can  
81 be divided according to their visa status into regular and irregular migrant workers.  
82 According to the Ministry of Home Affairs (MOHA), Malaysia issued 2 million work permits  
83 to documented migrant workers in 2019.<sup>7</sup> However, the total number of migrant workers,  
84 both documented and undocumented, is estimated to fall between 4.2 and 6.2 million people.<sup>2</sup>  
85 Another group that contributes significantly to the non-citizen population in Malaysia are

## Materials and Methods

1  
2  
3 86 refugees and asylum seekers. The terms refugees and asylum seekers are often used  
4  
5 87 interchangeably, yet, these populations differ by their legal status in destination countries and  
6  
7 88 subsequent vulnerabilities (see definitions in Table 1). In 2019, an approximate 178,580  
8  
9 89 refugees and asylum seekers were registered with the United Nations High Commissioner for  
10  
11 90 Refugees (UNHCR) in Malaysia, where 153,770 (86%) came from Myanmar. The remaining  
12  
13 91 number (14%) came from Yemen, Syria, Afghanistan, Iraq, Palestine, Pakistan, Sri Lanka,  
14  
15 92 Somalia, and other countries.<sup>8</sup>  
16  
17 93  
18  
19  
20  
21  
22 94 Refugees, asylum seekers, and both documented and undocumented low-skilled foreign  
23  
24 95 workers can be classified as vulnerable migrants in Malaysia, as these populations may face  
25  
26 96 significant hardships in their new country of residence.<sup>9 10</sup> Vulnerable migrants are more  
27  
28 97 prone to being exploited and abused, have an increased need to be protected by duty-bearers,  
29  
30 98 and are not able to fully benefit from their human rights.<sup>11</sup> Health is among these affected  
31  
32 99 human rights, as migrant workers and refugees could encounter various challenges to  
33  
34 100 maintain proper health and prevent poor health outcomes, including difficulties in accessing  
35  
36 101 healthcare and obtaining quality health services.<sup>11-13</sup> According to Sweileh et al,<sup>14</sup> assessing  
37  
38 102 the current status of scientific output and identifying research gaps could positively contribute  
39  
40 103 towards improving the evidence base for advocating for migrant health needs. Scoping  
41  
42 104 reviews can be helpful to map the academic literature and have been used by different  
43  
44 105 researchers to present the available evidence on migrant health in other countries.<sup>15 16</sup>  
45  
46 106  
47  
48  
49  
50  
51  
52  
53 107 Despite the burgeoning academic literature on migrant health in Malaysia, health information  
54  
55 108 on migrant-related issues is still limited, and public data remains difficult to access.  
56  
57 109 Aggravating the matter, there is no overall picture currently available of the evidence base on  
58  
59  
60

## Materials and Methods

1  
2  
3 110 migrant health in Malaysia, including critical appraisal of the quality of research. Therefore,  
4  
5 111 this study aims to map the existing academic literature on migrant health in Malaysia since  
6  
7 112 1965 to identify the gaps in this field, as well as to present an overview of the quality and  
8  
9 113 level of evidence of these scientific studies.  
10  
11  
12  
13  
14  
15  
16  
17  
18  
19  
20  
21  
22  
23  
24  
25  
26  
27  
28  
29  
30  
31  
32  
33  
34  
35  
36  
37  
38  
39  
40  
41  
42  
43  
44  
45  
46  
47  
48  
49  
50  
51  
52  
53  
54  
55  
56  
57  
58  
59  
60

For peer review only



## 114 **Method**

### 115 **General methods**

116 A scoping review was conducted, following the Preferred Reporting Items for Systematic  
117 reviews and Meta-Analyses – Extension for Scoping Reviews (PRISMA-ScR) guidelines<sup>17</sup>  
118 (Supplementary file 1). A pre-review protocol was developed to guide decisions for literature  
119 selection and structure of the review, and included the review question, aim, search strategy,  
120 selection criteria, and risk of bias assessment. However, the protocol was not formally  
121 registered and changed to some extent over the course of this review. The pre-review  
122 protocol can be accessed on request from the first author. Data were extracted and organised  
123 using the Bay Area Regional Health Inequities Initiative (BARHII) framework.<sup>18</sup> In addition,  
124 a decision tree was developed to classify the type of study design and level of evidence of  
125 each journal article. Subsequently, a quality assessment of the included literature was  
126 conducted by using the Joanna Briggs Institute (JBI) critical appraisal toolkit. Lastly, the data  
127 was analysed and a multiple-correspondence analysis (MCA) was applied to explore existing  
128 relationships between variables.

### 129 **Patient and public involvement**

130 There were no patients involved in this study. The findings of this study were presented at the  
131 Migrant Health Research Dissemination Workshop in Kuala Lumpur to stakeholders working  
132 on migrant health in Malaysia.<sup>19</sup>

### 133 **Conceptual framework**

134 The Bay Area Regional Health Inequities Initiative (BARHII) framework was utilised to  
135 organise the identified literature in this scoping review into specific factors that shape  
136 equitable health outcomes (Figure 1). The BARHII framework was selected due to its

## Materials and Methods

1  
2  
3 137 comprehensive nature and inclusion of various health dimensions, whereas other models  
4  
5 138 focused on specific public health elements or lacked clear explanation regarding the included  
6  
7  
8 139 health-related components of the model.<sup>20 21</sup>  
9

10  
11 140

12  
13  
14 141 [INSERT FIGURE 1]  
15

16  
17 142

18  
19  
20 143 The BARHII framework consists of six dimensions: 1) social inequities; 2) institutional  
21  
22 144 inequities; 3) living conditions; 4) risk behaviour; 5) disease and injury; and 6) mortality.

23  
24 145 Except for ‘social inequities,’ the other five categories were used to describe which health  
25  
26 146 dimension the particular articles focused on. The social inequities element was incorporated  
27  
28 147 by describing the population of interest, which were divided into three categories: foreign  
29  
30 148 workers, asylum seekers and refugees, and unclassified migrants. The lattermost category  
31  
32 149 was applied if a paper used the term ‘migrants’ or ‘immigrants’ but lacked specific  
33  
34 150 information to classify the study population as foreign workers or asylum seekers/refugees.  
35  
36

37  
38  
39 151 Institutional inequities include the practices of corporations, businesses, government  
40  
41 152 agencies, schools, not-for-profit organisations as well as laws, regulations, and policies that  
42  
43 153 could influence health outcomes (e.g., a regulation that obligates companies to financially  
44  
45 154 compensate an individual in case of a work incident).  
46  
47

48  
49 155 Living conditions consist of the physical environment (e.g., indoor air pollution), economic  
50  
51 156 and work environment (e.g., unemployment), social environment (e.g., discrimination in the  
52  
53 157 neighbourhood), and service environment (e.g., healthcare) that people live in, and that play a  
54  
55 158 role in determining their health outcomes (e.g., denied healthcare access due to visa status).  
56  
57  
58  
59  
60

## Materials and Methods

1  
2  
3 159 Risk behaviour includes smoking, poor nutrition, low physical activity, violence, alcohol and  
4  
5 160 other drugs, and sexual behaviour. This dimension reflects the way someone acts and how  
6  
7 161 that increases or decreases the risk of obtaining a particular health outcome (e.g., the attitude  
8  
9 162 and related behaviour towards smoking could influence an individual's level of risk of  
10  
11 163 developing lung cancer).

12  
13  
14  
15 164 Disease and injury consist of communicable diseases (also known as infectious diseases; e.g.,  
16  
17 165 chlamydia), chronic diseases (also known as non-communicable diseases; e.g., cancer), and  
18  
19 166 injuries (e.g., fractured bone). This dimension describes the number of people or individual  
20  
21 167 cases with a particular health outcome (e.g., ten out of the 100 people suffered from cancer).

22  
23  
24  
25 168 Mortality was changed to 'mortality and morbidity' and focused on death and disease rates of  
26  
27 169 the study population (e.g., ten out of 1,000 live births of children under the age of one died)  
28  
29 170 to distinguish epidemiological studies with larger samples from descriptive studies with  
30  
31 171 smaller samples, where the latter were categorised as disease and injury studies.

32  
33  
34  
35 172 Furthermore, some additional subdimensions were created during the data extraction stage, as  
36  
37 173 these were lacking in the original BARHII framework (e.g., the subdimension 'mental health'  
38  
39 174 was added to the disease and injury dimension).

### 175 **Search strategy**

176 Based on the guidelines of the London School of Hygiene and Tropical Medicine<sup>22</sup> and  
177 Bramer et al<sup>23</sup> on selecting the number and types of databases that should be included in  
178 biomedical systematic searches, six databases were selected for this study: Econlit, Embase,  
179 Global Health, Medline, PsycInfo, and Social Policy and Practice. This scoping review  
180 includes studies from 1965 onwards until 2019. However, all records (including records  
181 published before 1965) were retrieved to manually screen the data for publication date-related  
182 issues. The search process was conducted by AS and included a two-stage procedure to

## Materials and Methods

1  
2  
3 183 ensure that the search was exhaustive and to minimise the risk of missing potentially eligible  
4  
5 184 studies. The first stage focused on identifying English-language key words and Medical  
6  
7  
8 185 Subject Headings (MeSH) terms for migrants (e.g., immigrants, foreign workers, refugees),  
9  
10 186 health (e.g., disease, infection, disorder), and Malaysia (e.g., Sabah, Kuala Lumpur) through  
11  
12 187 reading search strategies of other review studies on migrant health as well as looking over  
13  
14 188 medical terminology of renowned medical institutions, such as the Mayo Clinic.  
15  
16  
17 189 Subsequently, these items were combined by using Boolean operators (e.g., migrant AND  
18  
19 190 health AND Malaysia) in the search platform of each database (Supplementary file 2).  
20  
21

22 **191 Selection criteria**

23  
24  
25 192 Studies were eligible for inclusion if they met the following inclusion criteria: 1) conducted  
26  
27 193 in Malaysia, including cross-national studies in which Malaysia was included; 2) published in  
28  
29 194 peer-reviewed academic journals; 3) primary outcomes of the study included a health-related  
30  
31 195 variable from at least one of the five health dimensions of the BARHII framework; 4)  
32  
33 196 employment of one of the following study designs: literature synthesis (systematic review,  
34  
35 197 meta-analysis, other scientific review designs), qualitative (interviews, focus group  
36  
37 198 discussions), and/or quantitative (randomised controlled trial, cohort, case-control, cross-  
38  
39 199 sectional, case series, case report) study design; 5) written in English; 6) inclusion of  
40  
41 200 international (im)migrants, foreign workers, asylum seekers, and refugees, as these groups  
42  
43 201 were considered as vulnerable migrant populations in Malaysia. Articles that included both  
44  
45 202 migrants and the general population were included in this study if sufficient information  
46  
47 203 concerning the migrant population was available.  
48  
49  
50  
51  
52

53 204 Studies were excluded if they were: 1) conducted or included data from 1965 or earlier, as  
54  
55 205 Singapore was part of Malaysia until 1965, and this study is careful to only include Malaysia  
56  
57 206 studies without Singapore; 2) grey literature; 3) opinion papers, editorials, fieldnotes of  
58  
59  
60

## Materials and Methods

1  
2  
3 207 symposia, conferences and workshop abstracts; 4) focused on non-citizens and foreigners,  
4  
5 208 where it was unclear whether a vulnerable migrant population was included (such as  
6  
7 209 permanent residents, naturalised persons, expatriates, temporary visitors, tourists, Malaysian  
8  
9 210 returnees, and international students); 5) only presented migrants as a control variable and no  
10  
11 211 other information regarding migrants was available.  
12  
13  
14

212 **Data extraction**

15  
16  
17  
18 213 Three reviewers (AS, ZC, and NP) were involved in the screening process, where all had  
19  
20 214 experience in the domain of public health and AS and NP had practical knowledge with  
21  
22 215 respect to conducting systematic reviews due to previous research work. Titles and abstracts  
23  
24 216 were exported by AS and subsequently moved into Rayyan, an open-source software  
25  
26 217 designed to support systematic reviews. AS and ZC were the main reviewers, where AS  
27  
28 218 conducted an entire screening of titles and abstracts and ZC assessed a randomly selected  
29  
30 219 20% sample. Independent screening was carried out by using the 'blind' function of Rayyan,  
31  
32 220 with both researchers working separately. The first stage involved screening titles and  
33  
34 221 abstracts according to the selection criteria. Subsequently, AS and ZC conducted an  
35  
36 222 independent full-text screening of all potential articles and attached comments to each article  
37  
38 223 on why the paper was included or excluded. After each screening stage, AS and ZC  
39  
40 224 compared their findings and discussed the discrepancies. In both stages, the discrepancies  
41  
42 225 were about 13% to 14% of the papers and were mostly around the study design and target  
43  
44 226 populations. Conflicts were examined and resolved by NP.  
45  
46  
47  
48  
49  
50

51 227 Following the full-text screening stage, the data were extracted by one reviewer (AS) and  
52  
53 228 disaggregated by the different dimensions of the BARHII framework, including the type of  
54  
55 229 migrant (social inequities), main health dimension (institutional inequities, living conditions,  
56  
57 230 risk behaviour, disease and injury, and mortality and morbidity), and health subdimensions.  
58  
59  
60

## Materials and Methods

231 Data extraction and categorisation into the BARHII framework categories was not cross-  
232 checked by a second reviewer due to time and human resource constraints.

233 For the next stage, a decision tree was developed to ensure that the correct quality appraisal  
234 tool by study design was selected and to identify the level of evidence of the included  
235 literature (Figure 2). Although various research designs were included in the decision tree,  
236 some study designs did not fit in this model, such as the mixed-method design.

237

238 [INSERT FIGURE 2]

239

240 The decision tree built on the study design tree from the Centre for Evidence-Based Medicine  
241 (CEBM)<sup>24</sup> and essentially allowed research of varying designs to be consistently, reliably  
242 classified into one of several design families. The newly developed decision tree was created  
243 through a two-step process. First, a definitions table of included research designs was  
244 developed to adapt specific characteristics of each definition into the decision tree to identify  
245 the paper's study design (Table 2).

246

247 [INSERT TABLE 2]

248

249 Second, Tomlin & Borgetto's<sup>29</sup> model was utilised to identify the level of evidence of the  
250 included literature, as the study designs that were included in their model were in line with  
251 the research designs in the definitions table. In addition, it was one of the few models that  
252 deconstructed the single-hierarchy framework and assigned study designs to different  
253 categories depending on the study objective (e.g., if the study design did not aim to provide a

## Materials and Methods

1  
2  
3 254 causal-relationship, but simply describe a particular outcome, the study design would be  
4  
5 255 classified as descriptive research), and, therefore, valued studies with different objectives  
6  
7  
8 256 equally. Tomlin & Borgetto's model consists of four dimensions, including descriptive  
9  
10 257 research, experimental research, outcome research, and qualitative research. Each of these  
11  
12 258 dimensions contains four subclasses to show the level of evidence within each class, where  
13  
14  
15 259 level 1 is the highest level of evidence and level 4 the lowest. The assignment of these levels  
16  
17 260 to the different study designs are based on the degree of internal validity/authenticity and  
18  
19 261 external validity/transferability, where level 1 is regarded with the highest level of these two  
20  
21 262 measures and level 4 ranks the lowest. Table 3 shows the different research dimensions that  
22  
23  
24 263 correspond with the included study designs and level of evidence.

25  
26  
27 26428  
29  
30 265 [INSERT TABLE 3]31  
32  
33 26634  
35  
36 267 After incorporating feedback on the questions used to identify the research design and  
37  
38 268 multiple testing rounds to assess if the questions were specific enough to distinguish these  
39  
40 269 designs within the full set of articles, the final version of the decision tree – as seen in Figure  
41  
42 270 2 – was used to extract the data.43  
44  
45 271 **Quality appraisal and level of evidence assessment**46  
47  
48 272 The quality assessment of the included studies was conducted by one reviewer (AS) based on  
49  
50 273 the Joanna Briggs Institute (JBI) critical appraisal tools,<sup>30</sup> as this toolkit includes checklists  
51  
52 274 for a wide variety of study designs that are most in line with the research designs included in  
53  
54 275 this study. Additional objective criteria specific to migrant health studies were developed for  
55  
56 276 each question of the JBI checklists to increase the reliability of the quality assessment. After  
57  
58 277 discussing the additional criteria and piloting the tools, slight modifications were made for  
59  
60

## Materials and Methods

1  
2  
3 278 the JBI tools, and these final versions were used to assess the quality of the papers. The  
4  
5 279 modified checklists can be accessed on request from the first author.  
6  
7  
8 280 Questions were answered with ‘Yes (V)’ if the study met the criteria according to  
9  
10 281 descriptions provided in the final version of the JBI toolkit. ‘No/Unclear (X)’ was selected if  
11  
12 282 the study did not address the question or if information to assess the given criteria was  
13  
14 283 lacking. The score concerning the quality of the study was determined by summing up all  
15  
16 284 ‘Yes’ answers and dividing this number by the total number of answered questions, which  
17  
18 285 differed by study design in the JBI tools. Questions that were answered with ‘Not applicable  
19  
20 286 (N/A)’ were excluded from the calculation. As the JBI toolkit has no standard scoring index,  
21  
22 287 the following scoring system was applied: 1) low quality = 0% to 50%; 2) moderate quality =  
23  
24 288 above 50% and below 75%; 3) high quality = 75% or higher. Although a four-band scoring  
25  
26 289 system – where each category would include a 25% scoring range – was considered, a three-  
27  
28 290 band scoring system was selected because the three given categories – low, moderate, and  
29  
30 291 high – would simplify the interpretation concerning the quality of the study. In a four-band  
31  
32 292 system, the distinction and classification of the two middle categories are less straightforward  
33  
34 293 compared to the three-band scoring system. Further, the first two categories in a four-band  
35  
36 294 scoring system would still represent a poor-quality study, and, hence, should be used to signal  
37  
38 295 more cautious interpretation of the study results among readers. The cut-off score was based  
39  
40 296 on the idea that if a study could answer ‘yes’ to only half or less of the questions, it would not  
41  
42 297 be sufficient to transmit a reliable message to the audience. Therefore, at least more than half  
43  
44 298 of the questions should be answered with ‘yes’ to obtain a moderate score. The 75% cut-off  
45  
46 299 was still based on the idea of having four equal scoring categories, where 75% and above  
47  
48 300 would be classified as a high-quality study and would inform the audience with a more  
49  
50 301 credible message.  
51  
52  
53  
54  
55  
56  
57  
58  
59

302 **Data analysis**



## Materials and Methods

1  
2  
3 303 Data concerning the type of migrant, health dimension, health subdimension, research design,  
4  
5 304 level of evidence, and quality assessment score were imported into Microsoft Excel for Mac  
6  
7 305 (version 16.28). Mean quality scores were calculated for the different variables by using  
8  
9 306 Microsoft Excel, including the type of migrant, health dimension, health subdimension,  
10  
11 307 research design, and level of evidence. RStudio (version 1.0.136; Macintosh; Intel Mac OS X  
12  
13 308 10\_15) was utilised to conduct chi-square tests and a multiple-correspondence analysis  
14  
15 309 (MCA). An MCA is a descriptive technique that can be utilised to visually demonstrate  
16  
17 310 relationships among the levels of several categorical variables – here, these include the type  
18  
19 311 of migrant, main health dimension, quality of the study, and research design – in a two-  
20  
21 312 dimensional space. The MCA projects categories in a two-dimensional space with axes  
22  
23 313 defined by latent dimensions (and, therefore, it is not possible to label the axes), based on  
24  
25 314 weighted Euclidean distances.<sup>31</sup> The MCA allows categories with similar profiles to be  
26  
27 315 grouped together, where a closer distance of categories within the same quadrant  
28  
29 316 demonstrates a stronger relationship, whereas categories that are further apart and in opposite  
30  
31 317 quadrants present weaker associations.<sup>32</sup> In addition to the MCA, chi-square tests were  
32  
33 318 conducted to assess whether categorical variables were independent (e.g., not associated). It  
34  
35 319 should be noted that a few studies included two BARHII dimensions, yet, the analysis only  
36  
37 320 allowed one dimension to be included. Therefore, only the most prominent dimension, based  
38  
39 321 on the amount of attention given to the specific dimension in the article, was selected and  
40  
41 322 used for the analysis.  
42  
43  
44  
45  
46  
47  
48  
49  
50  
51  
52  
53  
54  
55  
56  
57  
58  
59  
60

## Results

**Results**

The study selection process is presented in Figure 3. After removing the duplicates, 1,282 original records were identified. A total of 1,136 papers were excluded after the title and abstract screening stage due to focusing on another population of interest, lacking focus on a BARHII health dimension, not being a peer-reviewed academic article, and including data before 1965. As a result, 146 articles were eligible for the full-text screening stage. Subsequently, full-text articles were retrieved from these 146 records, and eventually, 67 papers met the inclusion criteria and were included in this review.

[INSERT FIGURE 3]

**Characteristics of included papers**

This section first demonstrates the findings of each BARHII dimension, followed by the results on the quality and level of evidence of the included studies. Lastly, existing relationships between the type of study design, study quality of the study, type of migrant, and main health dimension are shown. Table 4 presents a descriptive summary of all included articles, including the study design and corresponding level of evidence, study period, type of migrant, sample population, main health dimension, health subdimension, quality assessment score and a short description of the study.

[INSERT TABLE 4]

## Results

**345 Health dimension and type of migrant**

346 The literature was first assessed to understand the topical coverage of research against the six  
347 dimensions of the BARHII public health framework. The first dimension, social inequities,  
348 was used to describe the population of interest and refers to the type of migrant (e.g., foreign  
349 workers, asylum seekers and refugees, or unclassified migrants). The other five dimensions  
350 focused on elements that influence the health status of the population of interest, including  
351 institutional inequities, living conditions, risk behaviour, disease and injury, and mortality  
352 and morbidity. These latter five categories are outlined below and include results on the types  
353 of migrants researched within these dimensions. Figures 4 and 5 present overviews of the  
354 number of studies disaggregated by health dimension and type of migrant, respectively.

356 [INSERT FIGURE 4]

357

358 [INSERT FIGURE 5]

359

**360 Institutional inequities**

361 One paper addressed the institutional inequities dimension<sup>72</sup> by exploring the inclusion of  
362 migrant workers into national universal health coverage (UHC) policies in five countries of  
363 the Association of Southeast Asian Nations (ASEAN): Indonesia, Philippines, Malaysia,  
364 Thailand and Singapore. The researchers stated that Malaysia has implemented a medical  
365 insurance policy for foreign labour by obligating documented migrant workers to be enrolled  
366 in private insurance schemes, as non-citizens have no access to UHC at public facilities.

## Results

367 ***Living conditions***

368 Eleven papers were classified under the living conditions dimension, where most articles  
369 (n=9/11) addressed the service environment subdimension.<sup>9 36 63 64 76 80 94 95 98</sup> All of these  
370 papers studied the asylum seeker and refugee population, except for one article that focused  
371 on migrant workers.<sup>94</sup> Half the studies used qualitative methods to explore barriers to  
372 healthcare utilisation and showed that language difficulties, discrimination, insufficient health  
373 literacy, and cultural differences were common issues. One study focused on the social  
374 environment subdimension and showed that refugee children experienced discrimination by  
375 locals and other refugees of different ethnicities and national origins, such as stereotyping  
376 them as criminals.<sup>96</sup> Santos et al<sup>69</sup> assessed elements related to the work environment  
377 subdimension by investigating perceived environmental hazards among foreign workers,  
378 demonstrating that noise and dust were perceived as the greatest occupational health threats.

379 ***Risk behaviour***

380 Ten studies researched the risk behaviour dimension, with most articles (n=8/10) conducted  
381 on general migrant populations without clear identification of which migrant categories were  
382 included in their study.<sup>35 38 41 61 62 67 88 90</sup> Three of these articles focused on the sexual  
383 behaviour subdimension, exploring risk behaviour related to human papillomavirus (HPV).  
384 The studies showed that a significant number of migrant women have high HPV risk  
385 behaviour due to lack of understanding with respect to cervical cancer, the screening process,  
386 and poor knowledge concerning HPV vaccination.<sup>61 62 90</sup> Two papers, classified within the  
387 poor nutrition subdimension, showed poor health outcomes among detained migrants due to  
388 nutrition deficiencies.<sup>38 88</sup> The other articles among unclassified migrants included two  
389 studies on violence and abuse, exploring maternal filicide<sup>67</sup> and neglecting children<sup>35</sup>; and  
390 one study on alcohol and other drugs, pertaining to inhalants' usage.<sup>41</sup> These three studies

## Results

1  
2  
3 391 simply showed that migrants represent a certain proportion of the identified cases. Only the  
4  
5 392 study on the use of inhalants presented more cases among migrants than locals. Two final  
6  
7  
8 393 studies included foreign workers and explored the hygiene and sanitation and hazard and  
9  
10 394 safety awareness subdimensions.<sup>77 82</sup> Kamaludin & How<sup>77</sup> stated that migrant workers had  
11  
12 395 significantly less knowledge regarding environmental health, such as air quality, natural  
13  
14 396 hazards, sanitation, and industrial hazards, compared to local workers. Woh et al<sup>82</sup>  
15  
16  
17 397 investigated the level of hygiene among migrant food handlers and argued that personal  
18  
19 398 hygiene and sanitation measures should be improved among this population.  
20  
21  
22

**399 Disease and injurie**

23  
24  
25  
26 400 With a total of 46 studies, the disease and injury dimension presented the largest study field  
27  
28 401 of interest related to the BARHII framework. Most articles (n=36/46) studied foreign  
29  
30 402 workers,<sup>37 40 43 44 46-56 58-60 66 69 73-75 78 79 81 83-86 89 91-93 95 97</sup> while only six and four articles  
31  
32 403 included unclassified migrants<sup>39 45 57 65 68 70</sup> and refugee populations,<sup>33 34 71 87</sup> respectively. The  
33  
34 404 majority (n=27/46) of the articles studied communicable diseases, where 18 of these studies  
35  
36 405 focused on parasites,<sup>34 37 39 43 44 48-52 59 74 75 84 85 89 91 97</sup> eight on bacteria,<sup>45 47 60 65 68 70 79 81</sup> and  
37  
38 406 two on viruses.<sup>55 70</sup> Most of the studies were descriptive and presented that migrants,  
39  
40 407 irrespective of the defined type, represented a significant share among the study populations.  
41  
42  
43 408 Non-communicable diseases were studied far less compared to communicable diseases and  
44  
45 409 were only specifically addressed in three articles.<sup>33 53 73</sup> Scheutz et al<sup>33</sup> found high numbers of  
46  
47 410 different non-communicable oral complications among Vietnamese refugees, such as tooth  
48  
49 411 decay and missing teeth. Vijian et al<sup>73</sup> compared the difference in characteristics between  
50  
51 412 foreign workers and Malaysian patients with perforated peptic ulcers, showing that the  
52  
53  
54 413 treated foreign labour population were younger, experienced fewer post-operative  
55  
56  
57  
58  
59  
60

## Results

1  
2  
3 414 complications, and had smaller-sized ulcers compared to locals. Murty<sup>53</sup> reported a case  
4  
5 415 study, presenting a deceased migrant worker due to a cystic tumour in the heart region.  
6  
7  
8  
9 416 In addition to the studies that focused on single disease outcomes, two studies were  
10  
11 417 conducted that presented distributions of various diseases among foreign workers, including  
12  
13 418 communicable and non-communicable disorders.<sup>46 95</sup> Five studies focused on the mental  
14  
15 419 health subdimension, where these studies concentrated on describing psychiatric disorders,<sup>40</sup>  
16  
17 420 determining quality of life-related risk factors,<sup>57 71</sup> and testing the effect of different coping  
18  
19 421 mechanisms and therapy sessions on the level of stress.<sup>83 87</sup> Nine studies explored the injury  
20  
21 422 subdimension, where nearly all (n=8/9) studies focused on work-related injuries. Most of  
22  
23 423 these studies examined the prevalence of particular injuries and traumas, including fatal  
24  
25 424 lightning strikes,<sup>54</sup> ocular traumas,<sup>78</sup> and musculoskeletal pain.<sup>66 69 86</sup> Ratnasingam et al<sup>58</sup>  
26  
27 425 compared the number of occupational incidents between local workers and migrant workers,  
28  
29 426 where foreign workers had less accidents. In addition, two papers described risk factors for  
30  
31 427 work-related injuries, such as high machine-related vibration exposure<sup>56</sup> and low levels of the  
32  
33 428 company's safety commitment (as assessed by foreign workers themselves).<sup>92</sup> Ya'acob et al<sup>93</sup>  
34  
35 429 conducted an RCT to evaluate the impact of a specific workplace intervention on  
36  
37 430 musculoskeletal symptoms (MMS) among foreign labour and showed that the intervention  
38  
39 431 reduced musculoskeletal symptoms in the foot and ankle regions significantly compared to  
40  
41 432 the control group.

**433 Mortality and morbidity**

434 Two papers addressed the mortality and morbidity dimension by showing incidence rates  
435 among general cohorts of migrants. Zulkifli et al<sup>36</sup> conducted a study on maternal and child  
436 health in Sabah and identified that infant mortality rates were significantly higher for  
437 migrants compared to locals. Dony et al<sup>42</sup> also conducted a study in Sabah and showed that at

## Results

1  
2  
3 438 least 24% of new tuberculosis cases detected since 1990 were among migrants and that  
4  
5 439 leprosy incidence rates among migrants were on average 3.7 times higher than incidence rates  
6  
7  
8 440 among Malaysians.  
9

10  
11 441 **Level of evidence and quality of the study**  
12

13  
14 442 In total, 65 articles were included in the quality assessment; Tables 5 and 6 show the mean  
15  
16 443 quality scores of the papers disaggregated by BARHII dimension and level of evidence,  
17  
18 444 respectively. Two articles – representing a scoping review<sup>72</sup> and mixed-method design<sup>80</sup> –  
19  
20 445 were excluded from this assessment, as the JBI toolkit does not accommodate these study  
21  
22 446 designs. The quality assessment scores can be found in Supplementary file 3. In addition,  
23  
24 447 Figure 6 shows an overview of the number of studies disaggregated by research design.  
25  
26  
27  
28  
29

30 448

31  
32  
33 449 [INSERT TABLE 5]  
34

35  
36 450  
37  
38  
39

40 451 [INSERT TABLE 6]  
41  
42

43 452  
44  
45  
46

47 453 [INSERT FIGURE 6]  
48  
49

50 454  
51  
52  
53

54 455 In general, the quality of the evidence base on migrant health in Malaysia is low (49.2%) and  
55  
56 456 consists mostly of level 3 evidence papers (n=27/65). Level 2 evidence represents 38.5% of  
57  
58 457 the evidence base (n=25/65), followed by level 4 evidence papers (n=13/65). No level 1  
59  
60

## Results

1  
2  
3 458 evidence studies (systematic reviews or meta-analyses) were identified. The majority of the  
4  
5 459 papers (n=41/65) focused on foreign workers, however, studies that included asylum seekers  
6  
7 460 and refugees have the highest mean quality (58.4%). Furthermore, only four out of five  
8  
9 461 BARHII health dimensions were included in the quality assessment. The living conditions  
10  
11 462 dimension has the highest average score (59.7%), followed by the risk behaviour dimension  
12  
13 463 (48.7%), mortality and morbidity dimension (47.9%), and the disease and injury dimension  
14  
15 464 (46.3%). Moreover, the descriptive research category represents the majority (70.8%) of the  
16  
17 465 evidence base with a mean quality of 47.7%. The qualitative research category has the  
18  
19 466 highest mean quality and is the only research category with a high-quality score (76%).  
20  
21  
22  
23  
24

#### 25 467 **Associations between different variables**

26  
27  
28 468 Figure 7 presents the results of the multiple-correspondence analysis (MCA), showing  
29  
30 469 different associations between four dimensions: 1) type of study design; 2) quality of the  
31  
32 470 study; 3) type of migrant; and 4) main health dimension. Chi-square test results were utilised  
33  
34 471 to assess whether categorical variables were independent.  
35  
36  
37  
38  
39  
40  
41

42 473 [INSERT FIGURE 7]  
43  
44  
45  
46  
47  
48

49 475 High-quality studies tend to include refugees and asylum seekers ( $X^2 = 17.005$ ,  $df = 4$ ,  $p$ -  
50  
51 476 value = 0.001928), focus on living conditions ( $X^2 = 131.94$ ,  $df = 6$ ,  $p$ -value =  $< 2.2e-16$ ), and  
52  
53 477 have a qualitative research design ( $X^2 = 656.35$ ,  $df = 12$ ,  $p$ -value =  $< 2.2e-16$ ). Moreover,  
54  
55 478 studies that included foreign workers tend to focus on diseases and injuries ( $X^2 = 374.52$ ,  $df =$   
56  
57 479 6,  $p$ -value =  $< 2.2e-16$ ) and contain a case report study design ( $X^2 = 576.87$ ,  $df = 12$ ,  $p$ -value  
58  
59  
60



## Results

1  
2  
3 480 = < 2.2e-16). Furthermore, research that included the unclassified migrant population tend to  
4  
5 481 study the risk behaviour, and mortality and morbidity dimensions ( $X^2 = 374.52$ ,  $df = 6$ , p-  
6  
7 482 value = < 2.2e-16). Lastly, prevalence studies, and, to a lesser extent, analytical cross-  
8  
9  
10 483 sectional studies, tend to have a low-quality score ( $X^2 = 656.35$ ,  $df = 12$ , p-value = < 2.2e-  
11  
12 484 16).

For peer review only

Conclusion

## 485 **Discussion**

### 486 **Key findings**

487 This study mapped the existing academic literature on migrant health in Malaysia and  
488 assessed the quality and level of evidence of these scientific studies. Future research priorities  
489 based on the existing evidence and identified gaps are summarised in Table 7.

490  
491 [INSERT TABLE 7]

492  
493 Among the five BARHII health dimensions, institutional inequities, and mortality and  
494 morbidity were the least represented. Yet, studies concerning the influence of governance on  
495 migrant health are of utmost importance, as overarching governance can affect health  
496 outcomes of the other BARHII dimensions.<sup>99 100</sup> Similarly, epidemiological research on  
497 mortality and morbidity rates are necessary for population health statistics, to identify disease  
498 patterns, document changes over time, and inform plans of action to tackle these health  
499 issues.<sup>101</sup> Further research should focus on migrant health governance, as well as  
500 epidemiological research on morbidity and mortality among both migrants and non-migrants,  
501 to better understand the effects of policies on migrant health, which is particularly relevant in  
502 low- and middle-income countries (LMICs) where the evidence gap is so acute.<sup>102</sup>  
503 Furthermore, a recent systematic review on the effects of non-health-targeted policies on  
504 migrant health in high-income countries showed that non-health policies (e.g., restrictive  
505 immigration policies) were associated with poor health outcomes.<sup>103</sup> It is therefore important

## Conclusion

1  
2  
3 506 that policies in other sectors (potentially including, e.g., immigration, labour, education) are  
4  
5 507 also assessed for their potential consequences for migrant health.  
6  
7  
8  
9 508 Living conditions were represented in eleven studies and focused mainly (n=9/11) on the  
10  
11 509 service environment by addressing the healthcare setting. However, there is scarce  
12  
13 510 information on the social and economic environments that different categories of migrants  
14  
15 511 must navigate and no data on the physical environment at all. Research conducted in other  
16  
17 512 countries demonstrates the importance of these three subdimensions on migrant health.<sup>104-106</sup>  
18  
19 513 Shao et al<sup>104</sup> argued that inequalities regarding the level of income (economic environment)  
20  
21 514 influenced health outcomes among internal migrant workers in China. He & Wong<sup>105</sup> stated  
22  
23 515 that poor mental health among female migrant workers in China was related to gender-  
24  
25 516 specific stressors (social environment). Al-Khatib et al<sup>106</sup> demonstrated that poor housing  
26  
27 517 conditions (physical environment) in a refugee camp were directly associated with various  
28  
29 518 upper respiratory tract diseases. These studies underscore the importance of different  
30  
31 519 environments on migrant health, motivating a focus of future research on the health impact of  
32  
33 520 living conditions other than healthcare utilisation.  
34  
35  
36  
37  
38  
39  
40 521 Ten studies were conducted on risk behaviour with different subdimensions, from hygiene  
41  
42 522 and sanitation to violent and abusive behaviour. However, all of these subdimensions were  
43  
44 523 under-researched, as only limited elements of each subdimension were discussed. For  
45  
46 524 instance, three studies focused on sexual behaviour by addressing HPV knowledge.<sup>61 62 90</sup>  
47  
48 525 Yet, no attention was given to other sexual behaviour-related topics, such as condom use,  
49  
50 526 HIV knowledge, and birth control. Although these studies have been conducted in Malaysia,  
51  
52 527 this research is lacking in the migration context.<sup>107-109</sup> Therefore, future research should focus  
53  
54 528 on broader aspects of each subdimension, as demonstrated in research elsewhere. For  
55  
56 529 example, Renzaho & Burns<sup>110</sup> addressed the poor nutrition subdimension by showing that  
57  
58  
59  
60

## Conclusion

1  
2  
3 530 dietary patterns among African migrants changed negatively after arriving in Australia due to  
4  
5  
6 531 the increased intake of fast food and processed food. Ganle et al<sup>111</sup> concentrated on the sexual  
7  
8 532 risk behaviour subdimension and stated that 71% of the sampled refugees in Ghana had  
9  
10 533 transactional sex, and only 12% used contraceptives. Bosdriesz et al<sup>112</sup> compared smoking  
11  
12 534 between migrants and non-migrants in the United States (US) and showed that migrants  
13  
14 535 smoked less than US citizens. As a significant number of migrants in Malaysia come from  
15  
16 536 Indonesia, a population that smokes almost twice as much as Malaysians, smoking behaviour  
17  
18 537 among this migrant group may differ from locals.<sup>113</sup> Therefore, future research should further  
19  
20 538 explore the differences in other risk behaviours, such as smoking, between Malaysians and  
21  
22 539 migrants in Malaysia.

23  
24  
25  
26  
27 540 Disease and injury was the most researched dimension, representing more than two-thirds of  
28  
29 541 the evidence base on migrant health in Malaysia. Despite the strong representation, over half  
30  
31 542 the research papers concentrated on communicable diseases, while only a few examined non-  
32  
33 543 communicable diseases, consistent with global research output on international migrant  
34  
35 544 workers.<sup>114</sup> As the World Health Organization (WHO)<sup>115</sup> states that approximately 74% of all  
36  
37 545 deaths in Malaysia are attributable to non-communicable disease, in particular cardiovascular  
38  
39 546 disease, chronic respiratory disease, and diabetes, there is a need to expand research on non-  
40  
41 547 communicable disease trends and outcomes among the migrant population in Malaysia.

42  
43  
44  
45  
46  
47 548 We found that the majority of studies involved foreign workers (n=41/67), and only ten  
48  
49 549 studies examined asylum seekers and refugees as the primary population of interest. Our  
50  
51 550 findings, therefore, offer useful synthesis on migrant worker's health specifically, which is  
52  
53 551 lacking relative to studies on asylum seekers and refugees in global migration health  
54  
55 552 research.<sup>14</sup> Furthermore, eleven studies did not specify the included migrant population. This  
56  
57 553 issue could have occurred due to missing information on the type of migrant in the dataset  
58  
59  
60

## Conclusion

1  
2  
3 554 that the researchers used for their studies. For example, the Ministry of Health (MOH) will  
4  
5 555 not report anything more detailed than 'non-Malaysian,' as no further information on non-  
6  
7 556 citizens are collected during patient registration at MOH facilities. Ideally, all research on  
8  
9 557 migrants should clearly specify the type of migrants being studied and not omit crucial  
10  
11 558 details, such as gender, visa status, and country of origin. Also, human trafficking could  
12  
13 559 significantly affect a person's health and vulnerability, yet, there is very little known about  
14  
15 560 the health issues experienced by trafficked persons in Malaysia.<sup>116</sup> While the vulnerabilities  
16  
17 561 experienced by trafficked persons intersect with other migration-related vulnerabilities like  
18  
19 562 gender, ethnicity or documentation status, victims of human trafficking should be categorised  
20  
21 563 separately, to reflect their own unique status and vulnerability. The travel routes or modes of  
22  
23 564 transportation used by migrants to come to Malaysia may influence migrant health in  
24  
25 565 different ways a well, as different routes or modes of transportation may be linked with  
26  
27 566 specific hazards. Related to this issue is the lack of evidence on migrant health with specific  
28  
29 567 stages of migration, including pre-departure, travel, destination interception, and return,  
30  
31 568 where health outcomes might differ between these stages.<sup>117</sup>  
32  
33  
34  
35  
36  
37  
38  
39 569 Lastly, this scoping review revealed that the average quality of studies on migrant health in  
40  
41 570 Malaysia is poor (49.2%) and that most of these studies have level 3 (n=27/65) or level 2  
42  
43 571 (n=25/65) evidence. Only qualitative studies with more rigour (level 2 evidence) and those  
44  
45 572 that focus on living conditions and include the refugee and asylum seeker populations, tend to  
46  
47 573 have a high-quality score. Therefore, there is a clear need to conduct research that will  
48  
49 574 provide strong evidence to support practices and policies that will positively impact migrant  
50  
51 575 health. Creating standard research design-specific guidelines, if not existing already, and,  
52  
53 576 subsequently, promoting these materials among academics and research institutions, could  
54  
55 577 increase the quality of future research work. Furthermore, researchers should follow study  
56  
57  
58  
59  
60

## Conclusion

1  
2  
3 578 design specific reporting guidelines, to ensure that all relevant information is captured in  
4  
5 579 publications for further evidence synthesis, such as this review.  
6  
7  
8

580 **Limitations**

9  
10  
11  
12 581 This study is the first systematic literature synthesis and scoping review on migrant health in  
13  
14 582 Malaysia and presents a comprehensive overview of all identified peer-reviewed articles that  
15  
16 583 met the inclusion criteria. Specific recommendations based on this research are provided to  
17  
18 584 improve the evidence base on migrant health in Malaysia. Furthermore, we utilised a self-  
19  
20 585 developed decision tree and modified JBI checklists to help identify the type of study design  
21  
22 586 and corresponding level of evidence of the included studies. We found this evidence  
23  
24 587 assessment framework to be useful for the quality assessment of migrant health-related  
25  
26 588 studies, and it might be useful for other research fields as well. Yet, our review has several  
27  
28 589 limitations. As this paper focuses exclusively on vulnerable migrants within the non-citizen  
29  
30 590 population in Malaysia, we excluded other non-citizen groups, such as expatriates and  
31  
32 591 international students, based on the assumption that these groups are less vulnerable (e.g.,  
33  
34 592 expatriates in Malaysia have more privileges in terms of recognition regarding their roles in  
35  
36 593 society, receive better financial compensation, and tend to have access to many other benefits  
37  
38 594 compared to foreign workers). However, we acknowledge that other non-citizen groups may  
39  
40 595 face challenges in obtaining proper healthcare in Malaysia as well, such as issues related to  
41  
42 596 cultural competency among foreign students and retirees.<sup>118 119</sup> In addition, papers including  
43  
44 597 non-citizens without further description were excluded, although these studies may have  
45  
46 598 included the vulnerable migrant population.  
47  
48  
49  
50  
51  
52  
53

54 599 Only academic peer-reviewed studies were included, thus excluding grey literature,  
55  
56 600 editorials, and opinion papers. Also, only English language articles were included, resulting  
57  
58 601 in the exclusion of one paper in Bahasa Malaysia (the Malay language).<sup>120</sup> As a result, much  
59  
60

## Conclusion

1  
2  
3 602 relevant information that could potentially be used to inform both policies and practice could  
4  
5 603 have been excluded from this review.  
6  
7

8  
9 604 Inter-rater reliability was limited to a 20% sample of the records in the first screening stage,  
10  
11 605 and no data extraction nor quality assessment was verified by a second reviewer due to  
12  
13 606 resource constraints. Also, a decision tree or another selection format to objectively classify  
14  
15 607 the BARHII dimension and subdimension of each paper was not developed, and, therefore,  
16  
17 608 this paper might suffer from some selection bias. Yet, we anticipate low bias as the first  
18  
19 609 reviewer was the main researcher and was very familiar with the study design and included  
20  
21 610 frameworks.  
22  
23

24  
25  
26 611 Besides the BARHII framework, various conceptual public health models are available, and  
27  
28 612 using a different framework could lead to the identification of other gaps in the evidence base  
29  
30 613 related to specific dimensions of health. For instance, the WHO Commission on Social  
31  
32 614 Determinants of Health (CSDH) framework includes material circumstances, such as food  
33  
34 615 availability, whereas this dimension is not included in the BARHII framework.<sup>121</sup> Similarly,  
35  
36 616 critical appraisal tools other than the JBI toolkit are available and could affect the scores of  
37  
38 617 the quality assessment. Yet, the JBI toolkit offers a wider range of study design-specific tools  
39  
40 618 compared to others. Both the BARHII framework as well as the JBI toolkit were compared to  
41  
42 619 other public health models and critical appraisal tools, respectively, and seemed to be the best  
43  
44 620 fit for this study.  
45  
46  
47  
48  
49

50 621 Likewise, a decision tree was developed by using the characteristics of the used definitions of  
51  
52 622 different research designs as well as the specific traits of Tomlin & Borgetto's<sup>29</sup> level of  
53  
54 623 evidence model. Using other definitions and level of evidence models could result in a  
55  
56 624 different level of evidence categorisation. However, we believe this review makes a strong  
57  
58 625 methodological contribution by combining study designs and level of evidence in a unified  
59  
60

## Conclusion

1  
2  
3 626 decision tree, which can be used by researchers conducting systematic or scoping reviews  
4  
5 627 where accurate classification of the study design and associated evidence level, is important.  
6  
7  
8  
9 628 In order to conduct the multiple-correspondence analysis (MCA), the dataset could only  
10  
11 629 include one unit per dimension for each paper. As some studies included multiple BARHII  
12  
13 630 dimensions, only the most prominent dimension was included in the analysis. As a result, the  
14  
15 631 analysis may suffer from some selection bias and present slightly different outcomes  
16  
17 632 compared to an analysis that includes the other BARHII dimensions.  
18  
19  
20  
21 633 Lastly, no adjustments were made for outliers in the quality assessment. Therefore, some  
22  
23 634 papers with extremely high or low scores could have influenced specific dimensions and  
24  
25 635 might not reflect the quality of those dimensions perfectly.  
26  
27  
28

636 **Conclusion**

31  
32  
33 637 Migrant health remains an issue in Malaysia, yet, the quality of the evidence needed to  
34  
35 638 inform policies is currently lacking. Research-specific reporting guidelines should be  
36  
37 639 followed to improve the credibility and quality of the evidence base. Furthermore, future  
38  
39 640 research should focus more on evidence gaps in the mortality and morbidity, and institutional  
40  
41 641 inequities dimensions, and certain subdimensions, such as non-communicable diseases,  
42  
43 642 housing conditions, and physical inactivity, to provide a comprehensive picture of migrant  
44  
45 643 health in Malaysia. Apart from demonstrating the research gaps, this paper also makes  
46  
47 644 methodological contributions to migrant health research by providing a modified JBI toolkit  
48  
49 645 and a decision tree that identifies the type of study design and corresponding level of  
50  
51 646 evidence, both of which can be utilised in other research fields as well.  
52  
53  
54  
55  
56  
57  
58  
59  
60



## References

**647 Acknowledgements:**

648 We would like to thank Andrew Seko for granting us permission on behalf of the Bay Area  
649 Regional Health Inequities Initiative (BARHII) for the use of their public health framework  
650 in this scoping review. We would also like to thank Norhayati Binti Yahya for providing us  
651 with the definition for non-citizens on behalf of the Department of Statistics Malaysia  
652 (DOSM). Furthermore, we would like to thank the editor and four independent reviewers for  
653 their helpful feedback. Lastly, we would like to thank the United Nations University –  
654 International Institute for Global Health (UNU-IIGH) for its continuous support throughout  
655 this project.

**656 Consent for publication:**

657 Consent regarding the use of the BARHII framework was granted by BARHII.

**658 Copyright/license for publication:**

659 The Corresponding Author has the right to grant on behalf of all authors and does grant on  
660 behalf of all authors, a worldwide licence to the Publishers and its licensees in perpetuity, in  
661 all forms, formats and media (whether known now or created in the future) to i) publish,  
662 reproduce, distribute, display and store the Contribution, ii) translate the Contribution into  
663 other languages, create adaptations, reprints, include within collections and create summaries,  
664 extracts and/or, abstracts of the Contribution, iii) create any other derivative work(s) based on  
665 the Contribution, iv) to exploit all subsidiary rights in the Contribution, v) the inclusion of  
666 electronic links from the Contribution to third party material where-ever it may be located;  
667 and, vi) licence any third party to do any or all of the above.

**668 Competing interests:**

669 All authors have completed the Unified Competing Interest form (available on request from  
670 the corresponding author) and declare: no support from any organisation for the submitted

## References

671 work; no financial relationships with any organisations that might have an interest in the  
672 submitted work in the previous three years, no other relationships or activities that could  
673 appear to have influenced the submitted work.

**674 Contributors:**

675 AS, NP, MV and ZC created the study protocol. AS and ZC conducted abstract and full-text  
676 screening, and NP solved undisputed conflicts. AS extracted the data, drafted the decision  
677 tree, and modified the JBI tools, and NP, MV, ZC and CL provided feedback during these  
678 processes. CL and AS conducted the data analysis. AS drafted the initial version of the  
679 manuscript and AS, NP, MV, CL, TL and ZC critically revised and approved the final  
680 version.

**681 Transparency declaration:**

682 This manuscript is an honest, accurate, and transparent account of the study being reported.  
683 No important aspects of the study have been omitted, and any discrepancies from the study as  
684 planned have been explained.

**685 Ethical approval:**

686 No ethics and consent were required for this scoping review.

**687 Funding:**

688 None.

**689 Role of the study sponsors:**

690 N/A

**691 Statement of independence of researchers from funders:**

692 N/A

## References

693 **Trial registration details:**

694 N/A

695 **Data sharing:**

696 The pre-review protocol and modified JBI checklists can be accessed on request from the  
697 first author.

698 **Figure legends:**

699 Figure 1. Bay Area Regional Health Inequities Initiative (BARHII) framework.

700 Figure 2. Decision tree to identify the type of study design and corresponding level of  
701 evidence.

702 Figure 3. Flowchart of the data selection process.

703 Figure 4. Number of studies disaggregated by health dimension.

704 Figure 5. Number of studies disaggregated by type of migrant.

705 Figure 6. Number of studies disaggregated by research design.

706 Figure 7. Results of the multiple-correspondence analysis (MCA).

## References

**References**

- 707 1. International Organization for Migration. World migration report 2020. Geneva:  
708 International Organization for Migration 2019.  
709
- 710 2. International Organization for Migration. Malaysia [Internet]. Kuala Lumpur:  
711 International Organization for Migration; 2020 [cited 2020 Oct 01]. Available from:  
712 <https://www.iom.int/countries/malaysia>
- 713 3. Department of Statistics Malaysia. Population quick info [Internet]. Putrajaya:  
714 Department of Statistics Malaysia; 2020 [updated 2020 Apr 30; cited 2020 Apr 30].  
715 Available from:  
716 [https://www.dosm.gov.my/v1/index.php?r=column/cone&menu\\_id=b2RVUmEyZ2ZZ](https://www.dosm.gov.my/v1/index.php?r=column/cone&menu_id=b2RVUmEyZ2ZZYXhaUzUrdnpaWozdz09)  
717 [YXhaUzUrdnpaWozdz09](https://www.dosm.gov.my/v1/index.php?r=column/cone&menu_id=b2RVUmEyZ2ZZYXhaUzUrdnpaWozdz09)
- 718 4. Department of Statistics Malaysia. Current population estimates Malaysia 2019.  
719 Putrajaya: Department of Statistics Malaysia.
- 720 5. Office of the United Nations High Commissioner for Human Rights. The rights of non-  
721 citizens. Geneva: United Nations 2006.
- 722 6. International Organization for Migration. Glossary on migration. 2<sup>nd</sup> ed. Geneva:  
723 International Organization for Migration 2011.
- 724 7. Ministry of Home Affairs Malaysia. Statistik pekerja asing terkini mengikut negeri dan  
725 sektor [Internet]. Putrajaya: Ministry of Home Affairs Malaysia; 2019 [updated 2019  
726 Aug 1; cited 2020 Apr 14]. Available from:

## References

- 1  
2  
3 727 [http://www.data.gov.my/data/ms\\_MY/dataset/statistik-pekerja-asing-terkini-mengikut-](http://www.data.gov.my/data/ms_MY/dataset/statistik-pekerja-asing-terkini-mengikut-)  
4  
5 728 [negeri-dan-sektor](http://www.data.gov.my/data/ms_MY/dataset/statistik-pekerja-asing-terkini-mengikut-negeri-dan-sektor)  
6  
7  
8  
9 729 8. United Nations High Commissioner for Refugees. Figures at a glance in Malaysia  
10  
11 730 [Internet]. Kuala Lumpur: United Nations High Commissioner for Refugees; 2019  
12  
13 731 [cited 2019 Nov 20]. Available from: [https://www.unhcr.org/en-my/figures-at-a-](https://www.unhcr.org/en-my/figures-at-a-glance-in-malaysia.html)  
14  
15 732 [glance-in-malaysia.html](https://www.unhcr.org/en-my/figures-at-a-glance-in-malaysia.html)  
16  
17  
18  
19 733 9. Chuah FL, Tan ST, Yeo J, Legido-Quigley H. The health needs and access barriers  
20  
21 734 among refugees and asylum-seekers in Malaysia: a qualitative study. International  
22  
23 735 Journal for Equity in Health. 2018 Dec 1;17(1):120.  
24  
25  
26  
27 736 10. Devadason ES, Meng CW. Policies and laws regulating migrant workers in Malaysia:  
28  
29 737 A critical appraisal. Journal of Contemporary Asia. 2014 Jan 2;44(1):19-35.  
30  
31  
32  
33 738 11. International Organization for Migration. IOM handbook: protection and assistance for  
34  
35 739 migrants vulnerable to violence, exploitation and abuse. Geneva: International  
36  
37 740 Organization for Migration 2018.  
38  
39  
40  
41 741 12. Pocock NS, Suphanchaimat R, Chan CK, Faller EM, Harrigan N, Pillai V, Wickramage  
42  
43 742 K. Reflections on migrant and refugee health in Malaysia and the ASEAN region.  
44  
45 743 BMC Proceedings. 2018 Apr;12(Suppl 4):4.  
46  
47  
48  
49 744 13. Lasimbang HB, Tong WT, Low WY. Migrant workers in Sabah, East Malaysia: The  
50  
51 745 importance of legislation and policy to uphold equity on sexual and reproductive health  
52  
53 746 and rights. Best Practice & Research Clinical Obstetrics & Gynaecology. 2016 Apr  
54  
55 747 1;32:113-23.  
56  
57  
58  
59  
60

## References

- 1  
2  
3 748 14. Sweileh WM, Wickramage K, Pottie K, Hui C, Roberts B, Sawalha AF, Zyoud SH.  
4  
5 749 Bibliometric analysis of global migration health research in peer-reviewed literature  
6  
7 750 (2000–2016). BMC Public Health. 2018 Dec;18(1):777.  
8  
9  
10  
11 751 15. Villarroel N, Hannigan A, Severoni S, Puthoopparambil S, MacFarlane A. Migrant  
12  
13 752 health research in the Republic of Ireland: a scoping review. BMC Public Health. 2019  
14  
15 753 Dec;19(1):324.  
16  
17  
18  
19 754 16. Khanlou N, Haque N, Skinner A, Mantini A, Kurtz Landy C. Scoping review on  
20  
21 755 maternal health among immigrant and refugee women in Canada: prenatal, intrapartum,  
22  
23 756 and postnatal care. Journal of Pregnancy 2017 Jan;2017:1-14  
24  
25  
26  
27 757 17. Tricco AC, Lillie E, Zarin W, O'Brien KK, Colquhoun H, Levac D, Moher D, Peters  
28  
29 758 MD, Horsley T, Weeks L, Hempel S. PRISMA extension for scoping reviews  
30  
31 759 (PRISMA-ScR): Checklist and explanation. Annals of Internal Medicine. 2018 Oct  
32  
33 760 2;169(7):467-73.  
34  
35  
36  
37  
38 761 18. Bay Area Regional Health Inequities Initiative. Framework [Internet]. Oakland, CA:  
39  
40 762 Bay Area Regional Health Inequities Initiative; 2015 [cited 2019 Sep 18]. Available  
41  
42 763 from: <http://barhii.org/framework/>  
43  
44  
45  
46 764 19. United Nations University – International Institute for Global Health. Migrant Health  
47  
48 765 Research Dissemination Workshop [Internet]. Kuala Lumpur: United Nations  
49  
50 766 University – International Institute for Global Health; 2020 Jan 31 [cited 2020 Oct 3].  
51  
52 767 Available from: <https://iigh.unu.edu/news/news/policy-gaps.html>  
53  
54  
55  
56  
57  
58  
59  
60

## References

- 1  
2  
3 768 20. National Academies of Sciences, Engineering, and Medicine. *A framework for*  
4  
5 769 *educating health professionals to address the social determinants of health.*  
6  
7 770 Washington, DC: The National Academies Press 2016.  
8  
9  
10  
11 771 21. Public Health England. Public Health Outcomes Framework 2019/20: a consultation.  
12  
13 772 London: Public Health England 2019.  
14  
15  
16  
17 773 22. London School of Hygiene & Tropical Medicine. *Which databases should I search? A*  
18  
19 774 *guide to the most popular resources.* London: London School of Hygiene & Tropical  
20  
21 775 Medicine 2014.  
22  
23  
24  
25 776 23. Bramer WM, Rethlefsen ML, Kleijnen J, Franco OH. Optimal database combinations  
26  
27 777 for literature searches in systematic reviews: a prospective exploratory study.  
28  
29 778 Systematic Reviews. 2017 Dec 1;6(1):245.  
30  
31  
32  
33 779 24. Centre for Evidence-Based Medicine. Study designs. Oxford: Centre for Evidence-  
34  
35 780 Based Medicine; 2019 [cited 2019 Oct 10]. Available from:  
36  
37 781 <https://www.cebm.net/2014/04/study-designs/>  
38  
39  
40  
41 782 25. Centre for Cognitive Ageing and Cognitive Epidemiology. Systematic reviews and  
42  
43 783 meta-analyses: A step-by-step guide. Edinburgh: Centre for Cognitive Ageing and  
44  
45 784 Cognitive Epidemiology; 2013 [cited 2019 Oct 15]. Available from:  
46  
47 785 <https://www.ccace.ed.ac.uk/research/software-resources/systematic-reviews-and-meta->  
48  
49 786 [analyses](https://www.ccace.ed.ac.uk/research/software-resources/systematic-reviews-and-meta-)  
50  
51  
52  
53  
54 787 26. Alexander LK, Lopes B, Ricchetti-Masterson K, Yeatts KB. *ERIC notebook* [2<sup>nd</sup> ed].  
55  
56 788 Chapel Hill: Epidemiologic Research and Information Center, 2015.  
57  
58  
59  
60

## References

- 1  
2  
3 789 27. Cochrane Community. Glossary. London: Cochrane Community; 2019 [cited 2019 Nov  
4  
5 790 2]. Available from: <https://community.cochrane.org/glossary#letter-N>  
6  
7  
8  
9 791 28. Peacock JL, Peacock PJ. *Oxford Handbook of Medical Statistics*. Oxford: Oxford  
10  
11 792 University Press 2011.  
12  
13  
14  
15 793 29. Tomlin G, Borgetto B. Research pyramid: A new evidence-based practice model for  
16  
17 794 occupational therapy. *American Journal of Occupational Therapy*. 2011 Mar  
18  
19 795 1;65(2):189-96.  
20  
21  
22  
23 796 30. Aromataris E, Munn Z, editors. *Joanna Briggs Institute Reviewer's Manual*. Joanna  
24  
25 797 Briggs Institute, 2017. Available from:  
26  
27 798 <https://wiki.joannabriggs.org/display/MANUAL/JOBI+Reviewer%27s+Manual>  
28  
29  
30  
31 799 31. Greenacre M. *Correspondence analysis in practice*. 2<sup>nd</sup> ed. Boca Raton, FL: Chapman  
32  
33 800 & Hall/CRC 2007.  
34  
35  
36  
37 801 32. Le Roux B, Rouanet H. *Multiple correspondence analysis*. London: Sage 2010.  
38  
39  
40 802 33. Scheutz F, Heidmann J, Poulsen S. Dental health of Vietnamese boat people on Pulau  
41  
42 803 Bidong, Malaysia. *Community Dentistry and Oral Epidemiology*. 1983 Aug;11(4):255-  
43  
44 804 8.  
45  
46  
47  
48 805 34. Levy J. Epidemiological survey of intestinal parasitic infections in children of Sabah,  
49  
50 806 Malaysia. *Journal of Public Health*. 1988 Aug 1;10(3):240-9.  
51  
52  
53  
54 807 35. Kassim MS, George R, Kassim K, Begum M, Cherian MP, Tajudin AK, Chandran V,  
55  
56 808 Anan A, Reddy R, Singh J. Child abuse and neglect as seen in General Hospital, Kuala  
57  
58 809 Lumpur – A two year study. *The Medical Journal of Malaysia*. 1989 Jun;44(2):111-21.  
59  
60



## References

- 1  
2  
3 810 36. Zulkifli SN, U KM, Yusof K, Lin WY. Maternal and child health in urban Sabah,  
4  
5 811 Malaysia: a comparison of citizens and migrants. *Asia Pacific Journal of Public Health*.  
6  
7 812 1994 Jul;7(3):151-8.  
8  
9  
10  
11 813 37. Rajeswari B, Sinniah B, Hussein H. Socio-economic factors associated with intestinal  
12  
13 814 parasites among children living in Gombak, Malaysia. *Asia Pacific Journal of Public*  
14  
15 815 *Health*. 1994 Jan 1:21-5.  
16  
17  
18  
19 816 38. Jeyakumar D. Thiamine responsive ankle oedema in detention centre inmates. *The*  
20  
21 817 *Medical Journal of Malaysia*. 1995 Mar;50(1):17-20.  
22  
23  
24  
25 818 39. Jamaiah I, Anuar AK, Najib NA, Zurainee MN. Imported malaria: a retrospective study  
26  
27 819 in University Hospital, Kuala Lumpur, a ten-year experience. *Medical Journal of*  
28  
29 820 *Malaysia*. 1998;53(1):6-9.  
30  
31  
32  
33 821 40. Krahl W, Hashim A. Psychiatric disorders in ASEAN-migrants in Malaysia – A  
34  
35 822 university hospital experience. *The Medical Journal of Malaysia*. 1998 Sep;53(3):232-  
36  
37 823 8.  
38  
39  
40  
41 824 41. Zabedah MY, Razak M, Zakiah I, Zuraidah AB. Profile of solvent abusers (glue  
42  
43 825 sniffers) in East Malaysia. *The Malaysian Journal of Pathology*. 2001 Dec;23(2):105-9.  
44  
45  
46  
47 826 42. Dony JF, Ahmad J, Tiong YK. Epidemiology of tuberculosis and leprosy, Sabah,  
48  
49 827 Malaysia. *Tuberculosis*. 2004 Jan 1;84(1-2):8-18.  
50  
51  
52  
53 828 43. Chandran PA, Jayaram G, Mahmud R, Anuar AK. Microfilaria in hydrocele fluid  
54  
55 829 cytology. *The Malaysian Journal of Pathology*. 2004 Dec;26(2):119-23.  
56  
57  
58  
59  
60

## References

- 1  
2  
3 830 44. Nissapatorn V, Lim YA, Jamaiah I, Agnes LS, Amyliana K, Wen CC, Nurul H, Nizam  
4  
5 831 S, Quake CT, Valartmathi C, Woei CY. Parasitic infections in Malaysia: Changing and  
6  
7 832 challenges. *Southeast Asian Journal of Tropical Medicine and Public Health*.  
8  
9 833 2005;36:50-9.  
10  
11  
12  
13 834 45. Sobri M, Merican JS, Nordiyana M, Valarmathi S, Al-Edrus SA. Neuroimaging  
14  
15 835 features of tuberculous meningitis. *Medical Journal of Malaysia*. 2006 Mar;61(1):36-  
16  
17 836 40.  
18  
19  
20  
21 837 46. Leong CC. Pre-employment medical examination of Indonesian domestic helpers in a  
22  
23 838 private clinic in Johor Bahru – An eight year review. *Medical Journal of Malaysia*.  
24  
25 839 2006 Dec;61(5):592.  
26  
27  
28  
29  
30 840 47. Sasidharan S, Uyub AM, Azlan AA. Further evidence of ethnic and gender differences  
31  
32 841 for *Helicobacter pylori* infection among endoscoped patients. *Transactions of the Royal*  
33  
34 842 *Society of Tropical Medicine and Hygiene*. 2008 Dec 1;102(12):1226-32.  
35  
36  
37  
38 843 48. Masitah M. Malaria among foreign workers in Selangor, Malaysia. *Journal of Health*  
39  
40 844 *and Translational Medicine*. 2008 Dec 28;11(2):53-8.  
41  
42  
43  
44 845 49. Shailendra S, Prepageran N. Oropharyngeal rhinosporidiosis in a migrant worker: A  
45  
46 846 delayed presentation. *Medical Journal of Malaysia*. 2008 Mar;63(1):65.  
47  
48  
49  
50 847 50. Chan BT, Amal RN, Noor Hayati MI, Kino H, Anisah N, Norhayati M, Sulaiman O,  
51  
52 848 Mohammed Abdullah M, Fatmah MS, Roslida AR, Ismail G. Seroprevalence of  
53  
54 849 toxoplasmosis among migrant workers from different Asian countries working in  
55  
56 850 Malaysia. *Southeast Asian Journal of Tropical Medicine and Public Health*. 2008  
57  
58 851 Jan;39(1):9.  
59  
60

## References

- 1  
2  
3 852 51. Farhana F, Jamaiah I, Rohela M, Abdul-Aziz NM, Nissapatorn V. A ten year (1999-  
4  
5 853 2008) retrospective study of amoebiasis in University Malaya Medical Centre  
6  
7 854 (UMMC), Kuala Lumpur, Malaysia. *Tropical Biomedicine*. 2009 Dec 1;26:262-6.
- 8  
9  
10  
11 855 52. Chan BT, Amal RN, Noor Hayati MI, Kino H, Anisah N, Norhayati M. Comparative  
12  
13 856 study of seroprevalence of toxoplasmosis between local workers and migrant workers  
14  
15 857 in Malaysia. *Archives of Medical Science*. 2009 Apr 1;5(2):255.
- 16  
17  
18  
19 858 53. Murty OP. Cystic tumor of papillary muscle of heart: A rare finding in sudden death.  
20  
21 859 *The American Journal of Forensic Medicine and Pathology*. 2009 Jun 1;30(2):201-3.
- 22  
23  
24  
25 860 54. Murty OP, Kian CK, Husin MH, Yusuf WY. Fatal lightning strikes in Malaysia: A  
26  
27 861 review of 27 fatalities. *The American Journal of Forensic Medicine and Pathology*.  
28  
29 862 2009 Sep 1;30(3):246-51.
- 30  
31  
32  
33 863 55. Mustafa B, Hani AW, Mariam M, Khairul AH, Abdul Rasid K. Epidemiological and  
34  
35 864 clinical features of dengue versus other acute febrile illnesses amongst patients seen at  
36  
37 865 government polyclinics. *Medical Journal of Malaysia*. 2010 Dec 1;65(4):291-6.
- 38  
39  
40  
41 866 56. Su TA, Hoe VC, Masilamani R, Mahmud AB. Hand-arm vibration syndrome among a  
42  
43 867 group of construction workers in Malaysia. *Occupational and Environmental Medicine*.  
44  
45 868 2011 Jan 1;68(1):58-63.
- 46  
47  
48  
49 869 57. Daher AM, Ibrahim HS, Daher TM, k Anbori A. Health related quality of life among  
50  
51 870 Iraqi immigrants settled in Malaysia. *BMC Public Health*. 2011 Dec 1;11(1):407.
- 52  
53  
54  
55 871 58. Ratnasingam J, Ioras F, Ishak MK. Migrant contract workers and occupational  
56  
57 872 accidents in the furniture industry. *Journal of Applied Sciences*. 2011 Dec;11(14):2646-  
58  
59 873 51.

## References

- 1  
2  
3 874 59. Ab Rahman AK, Abdullah FH. Visceral leishmaniasis (kala-azar) and malaria  
4  
5 875 coinfection in an immigrant in the state of Terengganu, Malaysia: A case report.  
6  
7 876 Journal of Microbiology, Immunology and Infection. 2011 Feb 1;44(1):72-6.  
8  
9  
10  
11 877 60. Taib T, Baba R. Clinical characteristics of patients with leprosy in Hospital Kuala  
12  
13 878 Lumpur. Malaysian Journal of Dermatology. 2013 Jan 1;31:30-6.  
14  
15  
16  
17 879 61. Osman MT, Al-Naggar RA, Taha BI. Knowledge and awareness of cervical cancer  
18  
19 880 screening among Iraqi immigrant women living in Malaysia. World Journal of Medical  
20  
21 881 Sciences. 2013;8(2):123-9.  
22  
23  
24  
25 882 62. Minhat HS, Mustafa J, Sarabi S. Sociodemographic determinants of knowledge on  
26  
27 883 HPV vaccination among Iranian women living in Malaysia. Academic Journal of  
28  
29 884 Cancer Research. 2013;6(1):8-12.  
30  
31  
32  
33 885 63. Mendelsohn JB, Rhodes T, Spiegel P, Schilperoord M, Burton JW, Balasundaram S,  
34  
35 886 Wong C, Ross DA. Bounded agency in humanitarian settings: A qualitative study of  
36  
37 887 adherence to antiretroviral therapy among refugees situated in Kenya and Malaysia.  
38  
39 888 Social Science & Medicine. 2014 Nov 1;120:387-95.  
40  
41  
42  
43 889 64. Mendelsohn JB, Schilperoord M, Spiegel P, Balasundaram S, Radhakrishnan A, Lee  
44  
45 890 CK, Larke N, Grant AD, Sondorp E, Ross DA. Is forced migration a barrier to  
46  
47 891 treatment success? Similar HIV treatment outcomes among refugees and a surrounding  
48  
49 892 host community in Kuala Lumpur, Malaysia. AIDS and Behavior. 2014 Feb  
50  
51 893 1;18(2):323-34.  
52  
53  
54  
55  
56 894 65. Kwan Z, Pailoor J, Tan LL, Robinson S, Wong SM, Ismail R. Leprosy: An imported  
57  
58 895 disease. Leprosy Review. 2014 Sep 1;85(3):170-6.  
59  
60

## References

- 1  
2  
3 896 66. Santos A, Ramos HM, Ramasamy G, Fernandes C. Prevalence of musculoskeletal pain  
4  
5 897 in a sample of migrant workers in the manufacturing industry in Malaysia. Public  
6  
7 898 Health. 2014 Aug;128(8):759.  
9  
10  
11 899 67. Razali S, Salleh RI, Yahya B, Ahmad SH. Maternal filicide among women admitted to  
12  
13 900 forensic psychiatric institutions in Malaysia: Case series. East Asian Archives of  
14  
15 901 Psychiatry. 2015 Jun;25(2):79.  
16  
17  
18  
19 902 68. Elmi OS, Hasan H, Abdullah S, Jeab MZ, Alwi ZB, Naing NN. Multidrug-resistant  
20  
21 903 tuberculosis and risk factors associated with its development: A retrospective study.  
22  
23 904 The Journal of Infection in Developing Countries. 2015 Oct 29;9(10):1076-85.  
24  
25  
26  
27 905 69. Santos A, Ramos HM, Ramasamy G, Fernandes C. Musculoskeletal pain among  
28  
29 906 migrant workers in the Malaysian manufacturing industry: the impact of the physical  
30  
31 907 environment, workload and work patterns. Pertanika Journal of Social Sciences &  
32  
33 908 Humanities. 2015 Jun 1;23:315-24.  
34  
35  
36  
37  
38 909 70. William T, Parameswaran U, Lee WK, Yeo TW, Anstey NM, Ralph AP. Pulmonary  
39  
40 910 tuberculosis in outpatients in Sabah, Malaysia: Advanced disease but low incidence of  
41  
42 911 HIV co-infection. BMC Infectious Diseases. 2015 Dec 1;15(1):32.  
43  
44  
45  
46 912 71. Siah PC, Lee WY, Goh LY. Quality of life among refugee children in Malaysia – A  
47  
48 913 brief report. Vulnerable Children and Youth Studies. 2015 Oct 2;10(4):294-9.  
49  
50  
51  
52 914 72. Guinto RL, Curran UZ, Suphanchaimat R, Pocock NS. Universal health coverage in  
53  
54 915 ‘One ASEAN’: Are migrants included? Global Health Action. 2015 Dec 1;8(1):25749.  
55  
56  
57  
58  
59  
60

## References

- 1  
2  
3 916 73. Vijian K, Tata MD, Palayan K. Comparison of features and outcomes of perforated  
4  
5 917 peptic ulcer between Malaysians and foreigners. *Medical Journal of Malaysia*. 2016  
6  
7 918 Feb 1;71(1):13.
- 9  
10  
11 919 74. Azian MN, Hakim SL, Khadri MS, Yusri MY, Adela JI, Noor M, Nurhainis OS,  
12  
13 920 Karnan G, Shamilah H. Leishmaniasis in Peninsular Malaysia: The role of immigrant  
14  
15 921 workers and the vector. *Southeast Asian Journal of Tropical Medicine and Public*  
16  
17 922 *Health*. 2016 Jul 1;47(4):607-16.
- 19  
20  
21 923 75. Sahimin N, Lim YA, Ariffin F, Behnke JM, Lewis JW, Zain SN. Migrant workers in  
22  
23 924 Malaysia: Current implications of sociodemographic and environmental characteristics  
24  
25 925 in the transmission of intestinal parasitic infections. *PLoS Neglected Tropical Diseases*.  
26  
27 926 2016 Nov;10(11).
- 29  
30  
31 927 76. Noh NA, Wahab HA, Bakar Ah SH, Islam MR. Public health services for foreign  
32  
33 928 workers in Malaysia. *Social Work in Public Health*. 2016 Jul 28;31(5):419-30.
- 35  
36  
37 929 77. Kamaludin NA, How V. The inequality of environmental health awareness among  
38  
39 930 foreign immigrants and local blue-collar workers in Kuala Lumpur, Malaysia.  
40  
41 931 *Environmental Justice*. 2016 Dec 1;9(6):181-7.
- 43  
44  
45 932 78. Min NN, Vasudevan SK, Jasman AA, Aisyahbinti A, Myint KT. Work-related ocular  
46  
47 933 injuries in Johor Bahru, Malaysia. *International Eye Science*. 2016;16(3):416-22.
- 49  
50  
51 934 79. Woh PY, Thong KL, Behnke JM, Lewis JW, Zain SN. Characterization of  
52  
53 935 nontyphoidal *Salmonella* isolates from asymptomatic migrant food handlers in  
54  
55 936 Peninsular Malaysia. *Journal of Food Protection*. 2017 Aug;80(8):1378-83.
- 57  
58  
59  
60

## References

- 1  
2  
3 937 80. Tanabe M, Myers A, Bhandari P, Cornier N, Doraiswamy S, Krause S. Family  
4  
5 938 planning in refugee settings: Findings and actions from a multi-country study. *Conflict*  
6  
7 939 and Health. 2017 Dec;11(1):9.
- 8  
9  
10  
11 940 81. Ratnalingam V, Umapathy T, Sumugam K, Hanafi H, Retnasabapathy S. Microbial  
12  
13 941 keratitis in West and East Malaysia. *Internal Eye Science*. 2017;17(11):1989-92.
- 14  
15  
16  
17 942 82. Woh PY, Thong KL, Lim YA, Behnke JM, Lewis JW, Mohd Zain SN. Microorganisms  
18  
19 943 as an indicator of hygiene status among migrant food handlers in Peninsular Malaysia.  
20  
21 944 *Asia Pacific Journal of Public Health*. 2017 Oct;29(7):599-607.
- 22  
23  
24  
25 945 83. Noor NM, Shaker MN. Perceived workplace discrimination, coping and psychological  
26  
27 946 distress among unskilled Indonesian migrant workers in Malaysia. *International Journal*  
28  
29 947 of Intercultural Relations. 2017 Mar 1;57:19-29.
- 30  
31  
32  
33 948 84. Noordin R, Mohd Zain SN, Yunus MH, Sahimin N. Seroprevalence of lymphatic  
34  
35 949 filariasis among migrant workers in Peninsular Malaysia. *Transactions of The Royal*  
36  
37 950 *Society of Tropical Medicine and Hygiene*. 2017 Aug 1;111(8):370-2.
- 38  
39  
40  
41 951 85. Sahimin N, Lim YA, Ariffin F, Behnke JM, Basáñez MG, Walker M, Lewis JW,  
42  
43 952 Noordin R, Abdullah KA, Zain SN. Socio-demographic determinants of *Toxoplasma*  
44  
45 953 *gondii* seroprevalence in migrant workers of Peninsular Malaysia. *Parasites & Vectors*.  
46  
47 954 2017 Dec 1;10(1):238.
- 48  
49  
50  
51  
52 955 86. Labao HC, Faller EM, Bacayo MF. 'Aches and pains' of Filipino migrant workers in  
53  
54 956 Malaysia: A profile of work-related musculoskeletal disorders. *Annals of Global*  
55  
56 957 *Health*. 2018;84(3):474.
- 57  
58  
59  
60

## References

- 1  
2  
3 958 87. Shaw SA, Ward KP, Pillai V, Hinton DE. A group mental health randomized controlled  
4  
5 959 trial for female refugees in Malaysia. *American Journal of Orthopsychiatry*. 2018 Jul  
6  
7 960 23.
- 8  
9  
10  
11 961 88. Rahman SA, Jeffree MS, Kamaludin F, Din IA, Yusof M, Ahmed K. Beriberi outbreak  
12  
13 962 among unauthorised immigrants in a detention camp in Malaysia. *Journal of Immigrant  
14  
15 963 and Minority Health*. 2018 Oct 1;20(5):1294-7.
- 16  
17  
18  
19 964 89. Sahimin N, Douadi B, Lim AL, Behnke JM, Zain SN. Distribution of *Giardia*  
20  
21 965 *duodenalis* (Assemblages A and B) and *Cryptosporidium parvum* amongst migrant  
22  
23 966 workers in Peninsular Malaysia. *Acta Tropica*. 2018 Jun 1;182:178-84.
- 24  
25  
26  
27 967 90. Nwabichie CC, Manaf RA, Ismail SB. Factors affecting uptake of cervical cancer  
28  
29 968 screening among African women in Klang Valley, Malaysia. *Asian Pacific Journal of  
30  
31 969 Cancer Prevention*. 2018;19(3):825.
- 32  
33  
34  
35 970 91. Jeffree SM, Ahmed K, Safian N, Hassan R, Mihat O, Lukman KA, Shamsudin SB,  
36  
37 971 Kamaludin F. Falciparum malaria outbreak in Sabah linked to an immigrant rubber  
38  
39 972 tapper. *The American Journal of Tropical Medicine and Hygiene*. 2018 Jan  
40  
41 973 10;98(1):45-50.
- 42  
43  
44  
45 974 92. Zerguine H, Tamrin SB, Jalaludin J. Prevalence, source and severity of work-related  
46  
47 975 injuries among “foreign” construction workers in a large Malaysian organisation: A  
48  
49 976 cross-sectional study. *Industrial Health*. 2018:2017-0205.
- 50  
51  
52  
53 977 93. Ya’acob NA, Abidin EZ, Rasdi I, Rahman AA, Ismail S. Reducing work-related  
54  
55 978 musculoskeletal symptoms through implementation of Kiken Yochi training  
56  
57 979 intervention approach. *Work*. 2018 Jan 1;60(1):143-52.  
58  
59  
60



## References

- 1  
2  
3 980 94. Loganathan T, Rui D, Ng CW, Pocock NS. Breaking down the barriers: Understanding  
4  
5 981 migrant workers' access to healthcare in Malaysia. *PloS one*. 2019;14(7).  
6  
7  
8  
9 982 95. Rahman MM, Arif MT, Safii R, Tambi Z, Akoi C, Jantan Z, Halim SA. Care seeking  
10  
11 983 behaviour of Bangladeshi migrant workers in Sarawak, Malaysia. *Bangladesh Medical*  
12  
13 984 *Research Council Bulletin*. 2019 Jun 15;45(1):47-53.  
14  
15  
16  
17 985 96. Siah PC, Low SK, Lee WY, Lim YY, Tan JT. Discrimination perceived by child  
18  
19 986 refugees in Malaysia: from the views of representatives from refugees' community  
20  
21 987 service centres and non-government service. *Vulnerable Children and Youth Studies*.  
22  
23 988 2019 Sep 1:1-4.  
24  
25  
26  
27 989 97. Sahimin N, Lim YA, Noordin R, Yunus MH, Arifin N, Behnke JM, Zain SN.  
28  
29 990 Epidemiology and immunodiagnosics of *Strongyloides stercoralis* infections among  
30  
31 991 migrant workers in Malaysia. *Asian Pacific Journal of Tropical Medicine*. 2019 Jun  
32  
33 992 1;12(6):250.  
34  
35  
36  
37  
38 993 98. Chuah FL, Tan ST, Yeo J, Legido-Quigley H. Health system responses to the health  
39  
40 994 needs of refugees and asylum-seekers in Malaysia: A qualitative study. *International*  
41  
42 995 *Journal of Environmental Research and Public Health*. 2019 Jan;16(9):1584.  
43  
44  
45  
46 996 99. Vearey J, Orcutt M, Gostin L, Braham CA, Duigan P. Building alliances for the global  
47  
48 997 governance of migration and health. *BMJ*. 2019 Sep 16;366:14143.  
49  
50  
51  
52 998 100. World Health Organization Regional Office for Europe. Strategy and action plan for  
53  
54 999 refugee and migrant health in the WHO European Region. Copenhagen: World Health  
55  
56 1000 Organization Regional Office for Europe 2016.  
57  
58  
59  
60

## References

- 1  
2  
3 1001 101. Reidpath DD, Allotey P. Infant mortality rate as an indicator of population health.  
4  
5 1002 Journal of Epidemiology & Community Health. 2003 May 1;57(5):344-6.  
6  
7  
8  
9 1003 102. Vijayasingham L, Rhule E, Asgari-Jirhandeh N, Allotey P. Restrictive migration  
10  
11 1004 policies in low-income and middle-income countries. The Lancet Global Health. 2019  
12  
13 1005 Jul 1;7(7):e843-4.  
14  
15  
16  
17 1006 103. Juárez SP, Honkaniemi H, Dunlavy AC, Aldridge RW, Barreto ML, Katikireddi SV,  
18  
19 1007 Rostila M. Effects of non-health-targeted policies on migrant health: A systematic  
20  
21 1008 review and meta-analysis. The Lancet Global Health. 2019 Apr 1;7(4):e420-35.  
22  
23  
24  
25 1009 104. Shao C, Meng X, Cui S, Wang J, Li C. Income-related health inequality of migrant  
26  
27 1010 workers in China and its decomposition: An analysis based on the 2012 China labor-  
28  
29 1011 force dynamics survey data. Journal of the Chinese Medical Association. 2016 Oct  
30  
31 1012 1;79(10):531-7.  
32  
33  
34  
35 1013 105. He X, Wong DF. A comparison of female migrant workers' mental health in four cities  
36  
37 1014 in China. International Journal of Social Psychiatry. 2013 Mar;59(2):114-22.  
38  
39  
40  
41 1015 106. Al-Khatib IA, Ju'ba A, Kamal N, Hamed N, Hmeidan N, Massad S. Impact of housing  
42  
43 1016 conditions on the health of the people at al-Ama'ri refugee camp in the West Bank of  
44  
45 1017 Palestine. International Journal of Environmental Health Research. 2003 Dec  
46  
47 1018 1;13(4):315-26.  
48  
49  
50  
51  
52 1019 107. Mutalip MH, Mishkin K, Paiwai F, Sulaiman J, Yoep N. Factors associated with sexual  
53  
54 1020 intercourse, condom-use, and perceived peer behaviors among adolescents in Malaysia:  
55  
56 1021 A school-based cross-sectional study. Malaysian Journal of Social Sciences &  
57  
58 1022 Humanities. 2019 May 1;4(2):8-18.  
59  
60

## References

- 1  
2  
3 1023 108. Khan MA, Rosly NA, Majeed AB, Ismail NE. Knowledge of modes of HIV  
4  
5 1024 transmission among public secondary school students in urban and rural areas in  
6  
7 1025 Malaysia. *Pakistan Journal of Pharmaceutical Sciences*. 2018 Sep 1;31(5).  
8  
9  
10  
11 1026 109. Shakir M, Mahavera S, Wong LP, Lim Abdullah K, Adam P. Online STI information  
12  
13 1027 seeking behaviour and condom use intentions among young Facebook users in  
14  
15 1028 Malaysia. *Health Promotion International*. 2019.  
16  
17  
18  
19 1029 110. Renzaho AM, Burns C. Post-migration food habits of sub-Saharan African migrants in  
20  
21 1030 Victoria: A cross-sectional study. *Nutrition & Dietetics*. 2006 Jun;63(2):91-102.  
22  
23  
24  
25 1031 111. Ganle JK, Amoako D, Baatiema L, Ibrahim M. Risky sexual behaviour and  
26  
27 1032 contraceptive use in contexts of displacement: Insights from a cross-sectional survey of  
28  
29 1033 female adolescent refugees in Ghana. *International Journal for Equity in Health*. 2019  
30  
31 1034 Dec 1;18(1):127.  
32  
33  
34  
35 1035 112. Bosdriesz JR, Lichthart N, Witvliet MI, Busschers WB, Stronks K, Kunst AE. Smoking  
36  
37 1036 prevalence among migrants in the US compared to the US-born and the population in  
38  
39 1037 countries of origin. *PloS One*. 2013;8(3).  
40  
41  
42  
43 1038 113. Ritchie H, Roser M. Smoking. Oxford: Our World Data; 2019 [updated 2019 Nov;  
44  
45 1039 cited 2019 Nov 20]. Available from: <https://ourworldindata.org/smoking>  
46  
47  
48  
49 1040 114. Sweileh WM. Global output of research on the health of international migrant workers  
50  
51 1041 from 2000 to 2017. *Globalization and Health*. 2018 Dec 1;14(1):105.  
52  
53  
54  
55 1042 115. World Health Organisation. Noncommunicable diseases (NCD) country profiles –  
56  
57 1043 Malaysia. (n.p.): World Health Organisation 2018.  
58  
59  
60

## References

- 1  
2  
3 1044 116. Zimmerman C, Hossain M, Watts C. Human trafficking and health: A conceptual  
4  
5 1045 model to inform policy, intervention and research. *Social Science & Medicine*. 2011 Jul  
6  
7 1046 1;73(2):327-35.  
8  
9  
10  
11 1047 117. Zimmerman C, Kiss L, Hossain M. Migration and health: A framework for 21st century  
12  
13 1048 policy-making. *PloS Medicine*. 2011 May;8(5).  
14  
15  
16  
17 1049 118. Par M, Hassan SA, Uba I, Baba M. Perceived stress among International postgraduate  
18  
19 1050 students in Malaysia. *International Journal of Psychological Studies*. 2015 Dec  
20  
21 1051 1;7(4):1.  
22  
23  
24  
25 1052 119. Kohno A, Farid ND, Musa G, Aziz NA, Nakayama T, Dahlui M. Factors affecting  
26  
27 1053 Japanese retirees' healthcare service utilisation in Malaysia: A qualitative study. *BMJ*  
28  
29 1054 *Open*. 2016 Mar 1;6(3).  
30  
31  
32  
33 1055 120. Asits S, Noorhidayah I, Osman A. Migrasi bermusim: Pengaruhnya terhadap kawalan  
34  
35 1056 malaria di Sabah. *Medical Journal of Malaysia*. 1999;54(2):200-209.  
36  
37  
38  
39 1057 121. World Health Organization. A conceptual framework for action on the social  
40  
41 1058 determinants of health. Geneva: World Health Organization 2010.  
42  
43  
44  
45  
46  
47  
48  
49  
50  
51  
52  
53  
54  
55  
56  
57  
58  
59  
60

## Figure Legends

# Tables

Table 1. Definitions of migrant-related terms.

| <b>Term</b>                                                             | <b>Definition</b>                                                                                                                                                                                                                                                                                                                                                                                                                                                                           |
|-------------------------------------------------------------------------|---------------------------------------------------------------------------------------------------------------------------------------------------------------------------------------------------------------------------------------------------------------------------------------------------------------------------------------------------------------------------------------------------------------------------------------------------------------------------------------------|
| Regular migrant worker<br>(documented or legal<br>migrant worker)       | <i>“A migrant worker or members of his or her family authorised to enter, to stay and to engage in a remunerated activity in the State of employment pursuant to the law of that State and to international agreements to which that State is a party.”</i> <sup>6(p. 29)</sup>                                                                                                                                                                                                             |
| Irregular migrant worker<br>(undocumented or illegal<br>migrant worker) | <i>“Migrant workers or members of their families, who are not authorised to enter, to stay or to engage in employment in a State.”</i> <sup>6(p. 102)</sup>                                                                                                                                                                                                                                                                                                                                 |
| Refugee                                                                 | <i>“A person who, owing to a well-founded fear of persecution for reasons of race, religion, nationality, membership of a particular social group or political opinions, is outside the country of his nationality and is unable or, owing to such fear, is unwilling avail himself of the protection of that country.”</i> <sup>6(p. 79)</sup>                                                                                                                                             |
| Asylum seeker                                                           | <i>“A person who seeks safety from persecutions or serious harm in a country other than his or her own and awaits a decision on the application for refugee status under relevant international and national instruments. In case of a negative decision, the person must leave the country and may be expelled, as may any non-national in an irregular or unlawful situation, unless permission to stay is provided on humanitarian or other related grounds.”</i><br><sup>6(p. 12)</sup> |

## Figure Legends

Table 2. Definitions of included study designs.

| Study design                      | Definition                                                                                                                                                                                                                                                                                                               |
|-----------------------------------|--------------------------------------------------------------------------------------------------------------------------------------------------------------------------------------------------------------------------------------------------------------------------------------------------------------------------|
| <b>Analytical studies</b>         | Studies that strive to quantify the relationship between a particular exposure or intervention and the outcome of interest, where these studies include a comparison group to compare the outcome rates. <sup>24</sup>                                                                                                   |
| Systematic review                 | A study that is conducted systematically to collect all published evidence – that comply with the specified inclusion criteria – and provide a summary of the results to answer a specific research question. <sup>25</sup>                                                                                              |
| Randomised controlled trial (RCT) | An experimental study that includes at least two groups – treatment group and control group – to compare the outcomes between the group that received the intervention/drug and the group that received a placebo/no treatment. The participants of the group are randomly allocated to one of the groups. <sup>26</sup> |
| Quasi-experimental study/non-RCT  | An experimental study that includes at least two groups – treatment group and control group – to compare the outcomes between the group that received the intervention/drug and the group that received a placebo. The participants of the group are <b>not</b> randomly allocated to one of the groups. <sup>27</sup>   |
| Cohort study                      | A study that follows a group of people over time, where the participants are sampled based on the presence or absence of a particular exposure to compare the outcome of interest with a control group. <sup>26</sup>                                                                                                    |
| Case-control study                | A study that includes a group of people selected on the outcome of interest (cases) and a group without the outcome of interest (controls), followed by assessing previous exposure of both groups to determine if there is a relationship between the level of exposure and outcome of interest. <sup>26</sup>          |
| Analytical cross-sectional        | A study that looks at two groups – exposed and unexposed – and the outcome of interest at a particular point or period of time to compare the differences between the two groups. <sup>26</sup>                                                                                                                          |
| <b>Descriptive studies</b>        | Studies that do not strive to quantify a relationship between variables, but simply describe the disease outcome and characteristics within a defined population. Note that descriptive studies can still include analytic components. <sup>24</sup>                                                                     |
| Prevalence study                  | A study that looks at a population at a particular point or period of time to describe the prevalence of an outcome of interest. <sup>26</sup>                                                                                                                                                                           |
| Case series                       | A study where only subjects are included with a particular outcome of interest to describe the shared and diverging characteristics of this study population. <sup>28</sup>                                                                                                                                              |
| Case report                       | A study that describes an unfamiliar or extraordinary outcome of one individual. <sup>28</sup>                                                                                                                                                                                                                           |

## Tables

Table 3. Level of evidence for each study design.

| Research design                                               | Level of evidence | Abbreviation |
|---------------------------------------------------------------|-------------------|--------------|
| <b><i>Descriptive research</i></b>                            |                   |              |
| Systematic review of descriptive studies                      | 1                 | Des-1        |
| Prevalence study with analytical component                    | 2                 | Des-2        |
| Case series and prevalence study without analytical component | 3                 | Des-3        |
| Case report                                                   | 4                 | Des-4        |
| <b><i>Experimental research</i></b>                           |                   |              |
| Systematic review/meta-analysis of experimental studies       | 1                 | Exp-1        |
| Randomised controlled trial                                   | 2                 | Exp-2        |
| Group quasi-experimental study (a.k.a. non-RCT)               | 3                 | Exp-3        |
| Quasi-experimental study with single subject                  | 4                 | Exp-4        |
| <b><i>Observational research</i></b>                          |                   |              |
| Systematic review/meta-analysis of observational studies      | 1                 | Obs-1        |
| Cohort study                                                  | 2                 | Obs-2        |
| Case-control                                                  | 3                 | Obs-3        |
| Analytical cross-sectional study                              | 4                 | Obs-4        |
| <b><i>Qualitative research</i></b>                            |                   |              |
| Systematic review/meta-synthesis of qualitative studies       | 1                 | Qual-1       |
| Group qualitative studies with more rigor <sup>1</sup>        | 2                 | Qual-2       |
| Group qualitative studies with less rigor                     | 3                 | Qual-3       |
| Qualitative study with a single informant                     | 4                 | Qual-4       |

1 = Highest level of evidence; 4 = lowest level of evidence. Modifications have been made in the terminology to make this model more align with the included research designs in this study and are shown in the footnote below.<sup>2</sup>

<sup>1</sup> Rigor was subjectively assessed and based on the number of included participants, amount of collected data, and detailed explanation how the study was conducted.

<sup>2</sup> The following terminology of Tomlin & Borgetto's model have been modified: association/correlation studies = prevalence studies with analytical component; normative/descriptive studies = prevalence studies without analytical component; individual case studies = case report; controlled-clinical trials = group quasi-experimental study; single-subject studies = quasi-experimental study with single subject; pre-existing groups comparisons with covariate analysis = cohort study; one-group pre-post studies = analytical cross-sectional study.

## Tables

Table 4. Summary table of included articles.

| Reference                     | Study design                       | Study period        | Type of migrant                    | Sample population                                                            | Main category     | Subcategory                                  | Quality score   | Summary                                                                                                                                                                                                                                                                                                                                                                              |
|-------------------------------|------------------------------------|---------------------|------------------------------------|------------------------------------------------------------------------------|-------------------|----------------------------------------------|-----------------|--------------------------------------------------------------------------------------------------------------------------------------------------------------------------------------------------------------------------------------------------------------------------------------------------------------------------------------------------------------------------------------|
| Scheutz et al <sup>33</sup>   | Prevalence (Des-3)                 | January to May 1982 | Asylum seekers & refugees          | 361 Vietnamese refugees                                                      | Disease & injury  | Non-communicable disease (Oral health)       | Moderate (55.6) | Dental health of refugees was examined, and the study showed a positive relationship between the average number of tooth decay and missing teeth and increase in age among younger refugees.                                                                                                                                                                                         |
| Levy <sup>34</sup>            | Prevalence (Des-2)                 | July to August 1984 | Asylum seekers & refugees          | 297 children (94 Filipino, 104 Muruts, 99 Kadazan)                           | Disease & injury  | Communicable disease (Parasite)              | Low (44.4)      | Three groups of children – one refugee group and two indigenous groups – were examined for six types of intestinal parasites. Among the three groups, Filipino refugee children presented significant higher rates of <i>Trichuris trichiura</i> and <i>ascaris lumbricoides</i> compared to both groups.                                                                            |
| Kassim et al <sup>35</sup>    | Case series (Des-3)                | 1985 to 1986        | Unclassified migrants <sup>1</sup> | 86 children (7 migrants, <sup>2</sup> 34 Malays, 16 Chinese, 3 mixed origin) | Risk behaviour    | Violence & abuse (Neglect)                   | Moderate (60.0) | In total, 86 children were identified as cases suffering from different types of abuse. Among this group were 7 irregular migrant children, where they were identified as neglected, due to lacking nutritional and physical needs.                                                                                                                                                  |
| Zulkifli et al <sup>36</sup>  | Analytical cross-sectional (Obs-4) | N/A <sup>2</sup>    | Unclassified migrants              | 1,515 people (336 migrants, <sup>2</sup> 1,075 citizens)                     | Living conditions | Service environment (Healthcare utilisation) | Low (33.3)      | A comparison between migrants and locals regarding maternal and child health outcomes were studied. Migrant women had a lower usage of contraceptives and antenatal care, but used the services of traditional birth attendants more compared to local women. In addition, migrant women had statistically significantly higher rates regarding infant mortality compared to locals. |
| Rajeswari et al <sup>37</sup> | Prevalence (Des-3)                 | N/A <sup>2</sup>    | Foreign workers <sup>3</sup>       | 456 children (10 Indonesians, 357 Malays, 78 Orang Asli, 11 Indian)          | Disease & injury  | Communicable disease (Parasite)              | Low (22.2)      | School children were examined for different types of helminths and protozoa, and the study showed that children from migrant workers had the highest prevalence.                                                                                                                                                                                                                     |



## Tables

|                                 |                        |                                   |                                         |                                                                                                  |                          |                                                |                    |                                                                                                                                                                                                                                                                                                                                                                                                                                     |
|---------------------------------|------------------------|-----------------------------------|-----------------------------------------|--------------------------------------------------------------------------------------------------|--------------------------|------------------------------------------------|--------------------|-------------------------------------------------------------------------------------------------------------------------------------------------------------------------------------------------------------------------------------------------------------------------------------------------------------------------------------------------------------------------------------------------------------------------------------|
| Jeyakumar <sup>38</sup>         | Case series<br>(Des-3) | 10 May<br>1993 to 08<br>July 1993 | Unclassified<br>migrants <sup>1,4</sup> | 27 migrants<br>(23 Bangladeshi, 4<br>Indonesians)                                                | Risk<br>behaviour        | Poor nutrition<br>(Nutrition deficiency)       | Low<br>(40.0)      | Twenty-seven detained irregular migrants were sent to the hospital to treat ankle oedema, where they showed a positive response to thiamine treatment.                                                                                                                                                                                                                                                                              |
| Jamaiah et al <sup>39</sup>     | Case series<br>(Des-3) | 1983 to<br>1992                   | Unclassified<br>migrants <sup>1</sup>   | 134 people<br>(22 Indonesian, 22<br>Others, <sup>2,5</sup> 40 Chinese,<br>37 Malays, 13 Indians) | Disease &<br>injury      | Communicable<br>disease<br>(Parasite)          | Low<br>(40.0)      | A total of 134 malaria cases were admitted to University Hospital Kuala Lumpur between 1983 and 1992, including 22 irregular Indonesian migrants (16.4%) and 22 (16.4%) other foreigners (such as other irregular migrants from Bangladesh, India, and Thailand, as well as Vietnamese refugees. In addition, chloroquine-resistance was found in 9 irregular Indonesian migrants and 6 other foreigners.                           |
| Krahl &<br>Hashim <sup>40</sup> | Prevalence<br>(Des-3)  | January<br>1994 to<br>June 1996   | Foreign<br>workers <sup>6,7</sup>       | 39 people<br>(20 Indonesians, 16<br>Filipinos, 1 Bruneian, 1<br>Singaporean, 1 Thai)             | Disease &<br>Injury      | Mental health<br>(Psychiatric disorders)       | High<br>(77.8)     | Within a two-year period, 39 foreigners were admitted to the psychiatric wards of UHKL., including 30 migrant workers that suffered from a psychiatric disorder. Domestic workers represented with 23 cases the largest group among these foreign workers.                                                                                                                                                                          |
| Zabedah et<br>al <sup>41</sup>  | Prevalence<br>(Des-2)  | N/A <sup>2</sup>                  | Unclassified<br>migrants                | 37 people identified;<br>27 people included<br>(17 Filipinos, 10 locals)                         | Risk<br>behaviour        | Alcohol & other drugs<br>(Inhalant)            | Low<br>(22.2)      | Among the 37 suspected solvent abusers (glue sniffers) that were admitted to Bukit Padang Psychiatric Hospital, 27 children admitted using these inhalants. Almost two-third of the cases were Filipino immigrants.                                                                                                                                                                                                                 |
| Dony et al <sup>42</sup>        | Prevalence<br>(Des-3)  | N/A <sup>2</sup>                  | Unclassified<br>migrants                | 3,908 people<br>(943 foreigners, <sup>2</sup> 2,965<br>nationals)                                | Mortality &<br>Morbidity | Morbidity rates<br>(Tuberculosis &<br>leprosy) | Moderate<br>(62.5) | An epidemiological study aimed to present the tuberculosis and leprosy trends in Sabah. Since 1990, at least 24% of the annual tuberculosis cases were among Indonesian and Filipino migrants, where the annual rate differed between 100 to 200 cases per 100,000 population between 1990 and 2000. Furthermore, leprosy rates among migrants differed from 4.39 cases to 6.19 cases per 100,000 population between 1996 and 2001. |
| Chandran et<br>al <sup>43</sup> | Case report<br>(Des-4) | N/A <sup>2</sup>                  | Foreign workers                         | 1 Myanmar                                                                                        | Disease &<br>injury      | Communicable<br>disease                        | High<br>(83.3)     | A Jabouley procedure was carried out to treat a 30-year-old Myanmar worker that suffered from a filarial                                                                                                                                                                                                                                                                                                                            |

## Tables

|                                 |                     |                                    |                       |                                                                                                                       |                  |                                     |             |  |                                                                                                                                                                                                                                                                                                                  |
|---------------------------------|---------------------|------------------------------------|-----------------------|-----------------------------------------------------------------------------------------------------------------------|------------------|-------------------------------------|-------------|--|------------------------------------------------------------------------------------------------------------------------------------------------------------------------------------------------------------------------------------------------------------------------------------------------------------------|
|                                 |                     |                                    |                       |                                                                                                                       |                  | (Parasite)                          |             |  | infection. After the procedure, the patient was discharged, but did not show for the follow-up.                                                                                                                                                                                                                  |
| Nissapatorn et al <sup>44</sup> | Prevalence (Des-3)  | January 2000 to April 2004         | Foreign workers       | 1,885 patients <sup>2</sup>                                                                                           | Disease & injury | Communicable disease (Parasite)     | Low (50.0)  |  | Within a four-year period, 1,885 medical records of the University of Malaya Medical Centre were reviewed to identify the prevalence of four common protozoan infections. In total, 28 malaria cases were identified, where 60.7% was among foreigners. The majority of this group consisted of foreign workers. |
| Sobri et al <sup>45</sup>       | Case series (Des-3) | January 1995 to December 2001      | Unclassified migrants | 42 people<br>(7 Indonesians, 1 Burmese, 1 Siamese (Thai), 1 Bangladeshi, 1 Nepalese, 23 Malays, 6 Chinese, 2 Indians) | Disease & injury | Communicable disease (Bacteria)     | Low (50.0)  |  | In total, 42 patients were diagnosed with tuberculosis meningitis at the Kuala Lumpur Hospital during a 7-year period. Eleven (9.5%) out of the 42 tuberculosis meningitis patients were among immigrants.                                                                                                       |
| Leong <sup>46</sup>             | Prevalence (Des-3)  | 1 January 1997 to 31 December 2004 | Foreign workers       | 3,117 Indonesians                                                                                                     | Disease & injury | Various diseases (various diseases) | Low (44.4)  |  | During an 8-year-period, 3,117 female migrant (domestic) workers were screened at a private clinic in Johor Bahru, where 223 (7.2%) of them presented medical problems. Hypertension, pulmonary tuberculosis and hepatitis B were the top three major issues.                                                    |
| Sasidharan et al <sup>47</sup>  | Prevalence (Des-2)  | June 1999 to September 2001        | Foreign workers       | 697 people<br>(26 Bangladeshi, 276 Malays, 229 Chinese, 166 Indians)                                                  | Disease & injury | Communicable disease (Bacteria)     | High (77.8) |  | From 1999 to 2002, a total of 697 patients were examined for Helicobacter pylori infection. Twenty-six Bangladeshi foreign workers were among this group, and the infection was present in 6 of them.                                                                                                            |
| Masitah et al <sup>48</sup>     | Case series (Des-3) | N/A <sup>2</sup>                   | Foreign workers       | N/A <sup>2</sup>                                                                                                      | Disease & injury | Communicable disease (Parasite)     | Low (22.2)  |  | During a 6-year period, different malaria registries were reviewed to identify the number of cases in Selangor. The number of annual malaria cases decreased from 172 people in 2001 to 90 people in 2006, while the proportion of cases among migrant workers increased from 57% to 75%, respectively.          |

## Tables

|    |                             |             |                  |                      |                                     |           |                  |        |                                                             |
|----|-----------------------------|-------------|------------------|----------------------|-------------------------------------|-----------|------------------|--------|-------------------------------------------------------------|
| 1  |                             |             |                  |                      |                                     |           |                  |        |                                                             |
| 2  | Shailendra &                | Case report | N/A <sup>2</sup> | Foreign workers      | 1 Myanmar                           | Disease & | Communicable     | High   | A 38-year-old Myanmar migrant worker presented a case       |
| 3  | Prepageran <sup>49</sup>    | (Des-4)     |                  |                      |                                     | injury    | disease          | (75.0) | of oropharyngeal rhinosporidiosis. The abnormal growths     |
| 4  |                             |             |                  |                      |                                     |           | (Parasite)       |        | were removed, and the patient did not show any              |
| 5  |                             |             |                  |                      |                                     |           |                  |        | recurrence of the disease after a 3-month follow-up.        |
| 6  |                             |             |                  |                      |                                     |           |                  |        |                                                             |
| 7  | Chan et al <sup>50</sup>    | Analytical  | N/A <sup>2</sup> | Foreign              | 699 people                          | Disease & | Communicable     | Low    | A sample of 699 people were screened for toxoplasmosis,     |
| 8  |                             | cross-      |                  | workers <sup>1</sup> | (336 Indonesians, 45                | injury    | disease          | (0.0)  | including 501 migrant workers. Among the migrant            |
| 9  |                             | sectional   |                  |                      | Bangladeshi, 45                     |           | (Parasite)       |        | workers, 171 (34.1%) cases tested positive for the IgG      |
| 10 |                             | (Obs-4)     |                  |                      | Indians, 26 Nepalese,               |           |                  |        | antibodies test and 26 (5.2%) cases tested positive for the |
| 11 |                             |             |                  |                      | 22 Myanmar, 17                      |           |                  |        | IgM antibodies test. The statistical analysis showed that   |
| 12 |                             |             |                  |                      | Pakistani, 3 Africans, <sup>2</sup> |           |                  |        | the infection rate – using the IgG test – was significantly |
| 13 |                             |             |                  |                      | 3 Sri Lankans, 3 Thai,              |           |                  |        | higher among local residents compared to the foreign        |
| 14 |                             |             |                  |                      | 1 Chinese, 198                      |           |                  |        | workers.                                                    |
| 15 |                             |             |                  |                      | Malaysians)                         |           |                  |        |                                                             |
| 16 |                             |             |                  |                      |                                     |           |                  |        |                                                             |
| 17 | Farhana et al <sup>51</sup> | Case series | 1999 to          | Foreign workers      | 34 people                           | Disease & | Communicable     | Low    | A total of 34 amoebiasis cases were admitted to             |
| 18 |                             | (Des-3)     | 2008             |                      | (3 Myanmar, 1                       | injury    | disease          | (60.0) | University Malaya Medical Centre during a 10-year-          |
| 19 |                             |             |                  |                      | Indonesian, 1 Pakistani,            |           | (Parasite)       |        | period, including five foreign workers.                     |
| 20 |                             |             |                  |                      | 14 Chinese, 9 Malays, 6             |           |                  |        |                                                             |
| 21 |                             |             |                  |                      | Indians)                            |           |                  |        |                                                             |
| 22 |                             |             |                  |                      |                                     |           |                  |        |                                                             |
| 23 | Chan et al <sup>52</sup>    | Analytical  | N/A <sup>2</sup> | Foreign              | 699 people                          | Disease & | Communicable     | Low    | A sample of 699 people were screened for toxoplasmosis,     |
| 24 |                             | cross-      |                  | workers <sup>1</sup> | (336 Indonesians, 45                | injury    | disease          | (0.0)  | including 501 migrant workers. Among the migrant            |
| 25 |                             | sectional   |                  |                      | Bangladeshi, 45                     |           | (Parasite)       |        | workers, 171 (34.1%) cases tested positive for the IgG      |
| 26 |                             | (Obs-4)     |                  |                      | Indians, 26 Nepalese,               |           |                  |        | antibodies test and 26 (5.2%) cases tested positive for the |
| 27 |                             |             |                  |                      | 22 Myanmar, 17                      |           |                  |        | IgM antibodies test. The statistical analysis showed that   |
| 28 |                             |             |                  |                      | Pakistani, 3 Africans, <sup>2</sup> |           |                  |        | the infection rate – using the IgG test – was significantly |
| 29 |                             |             |                  |                      | 3 Sri Lankans, 3 Thai,              |           |                  |        | higher among local residents compared to the foreign        |
| 30 |                             |             |                  |                      | 1 Chinese, 198                      |           |                  |        | workers.                                                    |
| 31 |                             |             |                  |                      | Malaysians)                         |           |                  |        |                                                             |
| 32 |                             |             |                  |                      |                                     |           |                  |        |                                                             |
| 33 |                             |             |                  |                      |                                     |           |                  |        |                                                             |
| 34 |                             |             |                  |                      |                                     |           |                  |        |                                                             |
| 35 |                             |             |                  |                      |                                     |           |                  |        |                                                             |
| 36 |                             |             |                  |                      |                                     |           |                  |        |                                                             |
| 37 | Murty <sup>53</sup>         | Case report | N/A <sup>2</sup> | Foreign workers      | 1 Myanmar                           | Disease & | Non-communicable | High   | A 37-year-old foreign worker was found dead, and the        |
| 38 |                             | (Des-4)     |                  |                      |                                     | injury    | disease          | (80.0) | post-mortem examination showed that the case suffered       |
| 39 |                             |             |                  |                      |                                     |           | (Benign)         |        | from a cystic tumour in the heart.                          |
| 40 |                             |             |                  |                      |                                     |           |                  |        |                                                             |
| 41 |                             |             |                  |                      |                                     |           |                  |        |                                                             |
| 42 |                             |             |                  |                      |                                     |           |                  |        |                                                             |
| 43 |                             |             |                  |                      |                                     |           |                  |        |                                                             |
| 44 |                             |             |                  |                      |                                     |           |                  |        |                                                             |
| 45 |                             |             |                  |                      |                                     |           |                  |        |                                                             |
| 46 |                             |             |                  |                      |                                     |           |                  |        |                                                             |

## Tables

|                                    |                                              |                                        |                          |                                                                                                                                        |                     |                                    |                    |                                                                                                                                                                                                                                                                                                                                                                                                               |
|------------------------------------|----------------------------------------------|----------------------------------------|--------------------------|----------------------------------------------------------------------------------------------------------------------------------------|---------------------|------------------------------------|--------------------|---------------------------------------------------------------------------------------------------------------------------------------------------------------------------------------------------------------------------------------------------------------------------------------------------------------------------------------------------------------------------------------------------------------|
| Murty et al <sup>54</sup>          | Case series<br>(Des-3)                       | 1996 to<br>2005                        | Foreign workers          | 27 people<br>(16 Indonesians, 1<br>Bangladeshi, 1<br>Punjabi, <sup>2</sup> 1 Bajau, <sup>2</sup> 5<br>Malays, 2 Indians, 1<br>Chinese) | Disease &<br>injury | Injury<br>(Physical trauma)        | Low<br>(44.4)      | During a 10-year study period, 27 cases of fatal lightning strikes were identified. The majority of the cases were among foreign workers, where Indonesians had with 16 people (59.3%) the highest prevalence.                                                                                                                                                                                                |
| Mustafa et al <sup>55</sup>        | Prevalence<br>(Des-2)                        | August<br>2006 to<br>March 2009        | Foreign workers          | 558 patients<br>(34 foreign labour, <sup>2</sup> 347<br>Malays, 97 Indians, 80<br>Chinese)                                             | Disease &<br>injury | Communicable<br>disease<br>(Virus) | Low<br>(44.4)      | A total of 558 suspected dengue cases were identified, including 34 migrant workers. Among the foreign labour group, 20 patients presented acute dengue, 4 patients presented recent dengue, and 10 patients tested negative for dengue.                                                                                                                                                                      |
| Su et al <sup>56</sup>             | Analytical<br>cross-<br>sectional<br>(Obs-4) | 3 January<br>2007 to 24<br>April 2007  | Foreign workers          | 194 people <sup>8</sup><br>(95% Indonesians, 5%<br>Bangladeshi)                                                                        | Disease &<br>injury | Injury<br>(Physical syndrome)      | Moderate<br>(57.1) | During a 4-month cross-sectional study, 234 migrant workers were examined for level of occupational vibration exposure and health outcomes. In total, 18% of the migrant workers suffered from hand-arm vibration syndrome (HAVS). In addition, different HAVS-related symptoms were significantly higher among workers with high levels of exposure compared to migrant workers with low levels of exposure. |
| Daher et al <sup>57</sup>          | Prevalence<br>(Des-2)                        | September<br>2009 to<br>April 2010     | Unclassified<br>migrants | 253 Iraqi                                                                                                                              | Disease &<br>injury | Mental health<br>(Quality of life) | High<br>(75.0)     | Health-related quality of life of 253 Iraqi migrants was examined, showing that their quality of life was moderate and statically significant higher levels were found among males and married people.                                                                                                                                                                                                        |
| Ratnasingam<br>et al <sup>58</sup> | Prevalence<br>(Des-2)                        | January<br>2010 to<br>November<br>2010 | Foreign workers          | 5,340 people<br>(1,348 Bangladeshi,<br>843 Myanmar, 743<br>Nepalese, 217<br>Indonesians, 2,190<br>Malaysians)                          | Disease &<br>injury | Injury<br>(Physical trauma)        | Low<br>(11.1)      | A total of 5,340 workers in the furniture industry were examined, where 59% of this population was foreign labour. Compared to local workers, migrant workers had less occupational accidents and a more positive work-oriented mentality.                                                                                                                                                                    |

## Tables

|    |                                    |                      |                             |                           |                                                     |                   |                                              |             |                                                                                                                                                                                                                                                                                                                                                                                               |
|----|------------------------------------|----------------------|-----------------------------|---------------------------|-----------------------------------------------------|-------------------|----------------------------------------------|-------------|-----------------------------------------------------------------------------------------------------------------------------------------------------------------------------------------------------------------------------------------------------------------------------------------------------------------------------------------------------------------------------------------------|
| 1  |                                    |                      |                             |                           |                                                     |                   |                                              |             |                                                                                                                                                                                                                                                                                                                                                                                               |
| 2  | Ab Rahman & Abdullah <sup>59</sup> | Case report (Des-4)  | N/A <sup>2</sup>            | Foreign workers           | 1 Nepalese                                          | Disease & injury  | Communicable disease (Parasite)              | High (87.5) | A 24-year-old Nepalese migrant worker presented a long medical history of different symptoms, including fever, abdominal pain, and poor appetite. Clinical examination showed that the patient suffered from a visceral leishmaniasis and malaria co-infection, and he was treated with chloroquine and amphotericin B. A follow-up was carried out after 6 months and the man remained well. |
| 3  |                                    |                      |                             |                           |                                                     |                   |                                              |             |                                                                                                                                                                                                                                                                                                                                                                                               |
| 4  |                                    |                      |                             |                           |                                                     |                   |                                              |             |                                                                                                                                                                                                                                                                                                                                                                                               |
| 5  |                                    |                      |                             |                           |                                                     |                   |                                              |             |                                                                                                                                                                                                                                                                                                                                                                                               |
| 6  |                                    |                      |                             |                           |                                                     |                   |                                              |             |                                                                                                                                                                                                                                                                                                                                                                                               |
| 7  |                                    |                      |                             |                           |                                                     |                   |                                              |             |                                                                                                                                                                                                                                                                                                                                                                                               |
| 8  |                                    |                      |                             |                           |                                                     |                   |                                              |             |                                                                                                                                                                                                                                                                                                                                                                                               |
| 9  |                                    |                      |                             |                           |                                                     |                   |                                              |             |                                                                                                                                                                                                                                                                                                                                                                                               |
| 10 |                                    |                      |                             |                           |                                                     |                   |                                              |             |                                                                                                                                                                                                                                                                                                                                                                                               |
| 11 | Taib & Baba <sup>60</sup>          | Case series (Des-3)  | 2006 to 2009                | Foreign workers           | 75 patients (38 foreigners, <sup>8</sup> 37 locals) | Disease & injury  | Communicable disease (Bacteria)              | Low (30.0)  | A total of 75 leprosy cases were detected at the Hospital Kuala Lumpur Hansen's Clinic during a 4-year period. With 38 patients, foreign workers represented more than half of the cases.                                                                                                                                                                                                     |
| 12 |                                    |                      |                             |                           |                                                     |                   |                                              |             |                                                                                                                                                                                                                                                                                                                                                                                               |
| 13 |                                    |                      |                             |                           |                                                     |                   |                                              |             |                                                                                                                                                                                                                                                                                                                                                                                               |
| 14 |                                    |                      |                             |                           |                                                     |                   |                                              |             |                                                                                                                                                                                                                                                                                                                                                                                               |
| 15 |                                    |                      |                             |                           |                                                     |                   |                                              |             |                                                                                                                                                                                                                                                                                                                                                                                               |
| 16 |                                    |                      |                             |                           |                                                     |                   |                                              |             |                                                                                                                                                                                                                                                                                                                                                                                               |
| 17 | Osman et al <sup>61</sup>          | Prevalence (Des-3)   | June 2012 to September 2012 | Unclassified migrants     | 108 Iraqi                                           | Risk behaviour    | Sexual behaviour (HPV knowledge)             | Low (50.0)  | Knowledge and awareness regarding cervical cancer and pap smear tests were assessed among 108 Iraqi migrant women. In general, this population lacks understanding regarding cervical cancer and the importance of pap smear tests.                                                                                                                                                           |
| 18 |                                    |                      |                             |                           |                                                     |                   |                                              |             |                                                                                                                                                                                                                                                                                                                                                                                               |
| 19 |                                    |                      |                             |                           |                                                     |                   |                                              |             |                                                                                                                                                                                                                                                                                                                                                                                               |
| 20 |                                    |                      |                             |                           |                                                     |                   |                                              |             |                                                                                                                                                                                                                                                                                                                                                                                               |
| 21 |                                    |                      |                             |                           |                                                     |                   |                                              |             |                                                                                                                                                                                                                                                                                                                                                                                               |
| 22 |                                    |                      |                             |                           |                                                     |                   |                                              |             |                                                                                                                                                                                                                                                                                                                                                                                               |
| 23 | Minhat et al <sup>62</sup>         | Prevalence (Des-2)   | April 2010 to June 2010     | Unclassified migrants     | 271 Iranians                                        | Risk behaviour    | Sexual behaviour (HPV knowledge)             | Low (25.0)  | The knowledge regarding HPV vaccination of 271 Iranian female migrants was evaluated and showed that the majority of the study population has poor knowledge regarding this matter. Marital status was the only predicative factor that was statistically significant, where married women were 3.6 times more likely to have good HPV knowledge.                                             |
| 24 |                                    |                      |                             |                           |                                                     |                   |                                              |             |                                                                                                                                                                                                                                                                                                                                                                                               |
| 25 |                                    |                      |                             |                           |                                                     |                   |                                              |             |                                                                                                                                                                                                                                                                                                                                                                                               |
| 26 |                                    |                      |                             |                           |                                                     |                   |                                              |             |                                                                                                                                                                                                                                                                                                                                                                                               |
| 27 |                                    |                      |                             |                           |                                                     |                   |                                              |             |                                                                                                                                                                                                                                                                                                                                                                                               |
| 28 |                                    |                      |                             |                           |                                                     |                   |                                              |             |                                                                                                                                                                                                                                                                                                                                                                                               |
| 29 |                                    |                      |                             |                           |                                                     |                   |                                              |             |                                                                                                                                                                                                                                                                                                                                                                                               |
| 30 |                                    |                      |                             |                           |                                                     |                   |                                              |             |                                                                                                                                                                                                                                                                                                                                                                                               |
| 31 |                                    |                      |                             |                           |                                                     |                   |                                              |             |                                                                                                                                                                                                                                                                                                                                                                                               |
| 32 | Mendelsohn et al <sup>63</sup>     | Qualitative (Qual-2) | July 2010 to September 2010 | Asylum seekers & refugees | 14 Myanmar <sup>9</sup>                             | Living conditions | Service environment (Healthcare utilisation) | High (90.0) | Fourteen Myanmar refugees were interviewed to explore the difficulties that this group has in accessing anti-retroviral therapy (ART). Barriers to comply to ART include lack of an UNHCR identity card, fear of arrest during travelling to the hospital, corruption, financial issues, and receiving small quantities of ART medication per refill.                                         |
| 33 |                                    |                      |                             |                           |                                                     |                   |                                              |             |                                                                                                                                                                                                                                                                                                                                                                                               |
| 34 |                                    |                      |                             |                           |                                                     |                   |                                              |             |                                                                                                                                                                                                                                                                                                                                                                                               |
| 35 |                                    |                      |                             |                           |                                                     |                   |                                              |             |                                                                                                                                                                                                                                                                                                                                                                                               |
| 36 |                                    |                      |                             |                           |                                                     |                   |                                              |             |                                                                                                                                                                                                                                                                                                                                                                                               |
| 37 |                                    |                      |                             |                           |                                                     |                   |                                              |             |                                                                                                                                                                                                                                                                                                                                                                                               |
| 38 |                                    |                      |                             |                           |                                                     |                   |                                              |             |                                                                                                                                                                                                                                                                                                                                                                                               |
| 39 |                                    |                      |                             |                           |                                                     |                   |                                              |             |                                                                                                                                                                                                                                                                                                                                                                                               |
| 40 |                                    |                      |                             |                           |                                                     |                   |                                              |             |                                                                                                                                                                                                                                                                                                                                                                                               |
| 41 |                                    |                      |                             |                           |                                                     |                   |                                              |             |                                                                                                                                                                                                                                                                                                                                                                                               |
| 42 |                                    |                      |                             |                           |                                                     |                   |                                              |             |                                                                                                                                                                                                                                                                                                                                                                                               |
| 43 |                                    |                      |                             |                           |                                                     |                   |                                              |             |                                                                                                                                                                                                                                                                                                                                                                                               |
| 44 |                                    |                      |                             |                           |                                                     |                   |                                              |             |                                                                                                                                                                                                                                                                                                                                                                                               |
| 45 |                                    |                      |                             |                           |                                                     |                   |                                              |             |                                                                                                                                                                                                                                                                                                                                                                                               |
| 46 |                                    |                      |                             |                           |                                                     |                   |                                              |             |                                                                                                                                                                                                                                                                                                                                                                                               |

## Tables

|                                |                                    |                            |                           |                                                                                                                           |                   |                                              |                 |                                                                                                                                                                                                                                                                                                                                         |
|--------------------------------|------------------------------------|----------------------------|---------------------------|---------------------------------------------------------------------------------------------------------------------------|-------------------|----------------------------------------------|-----------------|-----------------------------------------------------------------------------------------------------------------------------------------------------------------------------------------------------------------------------------------------------------------------------------------------------------------------------------------|
| Mendelsohn et al <sup>64</sup> | Analytical cross-sectional (Obs-4) | April 2010 to July 2010    | Asylum seekers & refugees | 299 people<br>(146 Myanmar, 5 Others, <sup>2</sup> 148 Malaysians)                                                        | Living conditions | Service environment (Healthcare utilisation) | High (83.3)     | ART compliance and virological outcomes were compared between HIV-infected refugees and locals, where the study showed that both groups had similar rates of compliance and unsuppressed viral loads.                                                                                                                                   |
| Kwan et al <sup>65</sup>       | Case series (Des-3)                | 2008 to 2013               | Unclassified migrants     | 27 people<br>(3 Indonesians, 2 Indians, 2 Nepalese, 2 Myanmar, 1 Sri Lankan, 17 Malaysians)                               | Disease & injury  | Communicable disease (Bacteria)              | Low (40.0)      | Between 2008 and 2013, 27 leprosy cases were identified by reviewing the Dermatology Clinic census. Out of the 27 identified leprosy cases, 37% of them were among immigrants.                                                                                                                                                          |
| Santos et al <sup>66</sup>     | Prevalence (Des-3)                 | February 2013 to June 2013 | Foreign workers           | 317 people<br>(110 Sri Lankans, 85 Indonesians, 71 Indians, <sup>8</sup> 22 Nepalese, 20 Indians, <sup>8</sup> 9 Myanmar) | Disease & injury  | Injury (Physical syndrome)                   | Moderate (55.6) | A sample of 317 migrant workers were examined to explore the prevalence of musculoskeletal pain among this group. Almost two-third (203 people) of the surveyed migrant workers suffered from work-related musculoskeletal complaints. Pain in the knee/leg/foot area was the most common, as 85 migrant workers reported this outcome. |
| Razali et al <sup>67</sup>     | Case series (Des-3)                | 2000 to 2012               | Unclassified migrants     | 18 females<br>(2 Indonesians, 1 Myanmar, 6 Malays, 5 Chinese, 3 Indians, 1 Punjabi)                                       | Risk behaviour    | Violence & abuse (Murder)                    | High (80.0)     | Clinical records of two forensic psychiatric institutions were reviewed during 2000 and 2012. A total of 18 cases that committed maternal filicide were detected, including 3 immigrant women that suffered from adverse life events.                                                                                                   |
| Elmi et al <sup>68</sup>       | Case control (Obs-3)               | January 2010 to April 2014 | Unclassified migrants     | 209 cases<br>(49 migrants, <sup>2</sup> 265 locals)                                                                       | Disease & injury  | Communicable disease (Bacteria)              | Low (50.0)      | A case control study was conducted to identify risk factors regarding multidrug-resistant tuberculosis (MDR-TB) development. The study showed that MDR-TB was more prevalent than non-MDR-TB among foreign patients, and that MDR-TB was significantly higher among migrants compared to locals.                                        |
| Santos et al <sup>69</sup>     | Prevalence (Des-2)                 | March 2013 to April 2013   | Foreign workers           | 317 people<br>(110 Sri Lankans, 85 Indonesians, 71                                                                        | Living conditions | Economic & work environment                  | Low (44.4)      | The study assessed overall levels of pain and identified perceived environmental hazards among a group of foreign workers. In total, 204 out of 317 migrant workers                                                                                                                                                                     |

## Tables

|                             |                                              |                                  |                              |                                                                                                                                                            |                                                                                     |                                                      |                                                                |  |                                                                                                                                                                                                                                                                                                                                                                                                                                                   |
|-----------------------------|----------------------------------------------|----------------------------------|------------------------------|------------------------------------------------------------------------------------------------------------------------------------------------------------|-------------------------------------------------------------------------------------|------------------------------------------------------|----------------------------------------------------------------|--|---------------------------------------------------------------------------------------------------------------------------------------------------------------------------------------------------------------------------------------------------------------------------------------------------------------------------------------------------------------------------------------------------------------------------------------------------|
|                             |                                              |                                  |                              |                                                                                                                                                            | <i>Indians,<sup>8</sup> 22 Nepalese,<br/>20 Indians,<sup>8</sup> 9<br/>Myanmar)</i> | Disease &<br>injury                                  | (Occupational<br>hazards)<br><br>Injury<br>(Physical syndrome) |  | suffered from musculoskeletal pain, and noise (37.5%)<br>and dust (37.2%) were perceived as the main<br>environmental hazards among this group.                                                                                                                                                                                                                                                                                                   |
| William et al <sup>70</sup> | Prevalence<br>(Des-2)                        | 4 July 2012<br>to 3 July<br>2014 | Unclassified<br>migrants     | 176 people<br>(53 Filipinos, 6<br>Indonesians, 106<br>Indigenous, 10 Chinese,<br>1 Indian)                                                                 | Disease &<br>injury                                                                 | Communicable<br>disease<br>(Bacteria & Virus)        | High<br>(77.8)                                                 |  | During a 2-year study, 176 participants that tested positive<br>for pulmonary tuberculosis at the Luyang Clinic in Kota<br>Kinabalu were enrolled in the study. More than one-third<br>of the patients (33.5%) were migrants. In addition, out of<br>the three patients with a HIV co-infection, one was a<br>migrant.                                                                                                                            |
| Siah et al <sup>71</sup>    | Prevalence<br>(Des-2)                        | N/A <sup>2</sup>                 | Asylum seekers<br>& refugees | 89 children<br>(39.3% Myanmar,<br>21.3% Somali, 22.5%<br>Sudanese, 16.9%<br>Others <sup>2</sup> )                                                          | Disease &<br>injury                                                                 | Mental health<br>(Quality of life)                   | Low<br>(11.1)                                                  |  | A total of 89 refugee children were surveyed to<br>investigate factors that influence their quality of life.<br>Experiencing deportation, lower levels of education and<br>unemployment of their fathers were significantly<br>associated with a lower quality of life.                                                                                                                                                                           |
| Guinto et al <sup>72</sup>  | Scoping<br>review <sup>10</sup>              | 2000 to<br>2014                  | Foreign workers              | N/A                                                                                                                                                        | Institutional<br>inequities                                                         | Laws & regulations<br>(Universal Health<br>Coverage) | N/A                                                            |  | The study presented implementation challenges of<br>universal health coverage (UHC) in Southeast Asian<br>countries. Malaysia implemented some measures<br>regarding healthcare for migrant workers, however,<br>government-run UHC is still lacking.                                                                                                                                                                                             |
| Vijian et al <sup>73</sup>  | Analytical<br>cross-<br>sectional<br>(Obs-4) | 2010 to<br>2015                  | Foreign workers              | 50 people<br>(8 Bangladeshi, 6<br>Nepalese, 3 Myanmar, 1<br>African, <sup>2,11</sup> 1 Pakistani,<br>1 Vietnamese, 14<br>Malays, 12 Chinese, 4<br>Indians) | Disease &<br>injury                                                                 | Non-communicable<br>disease<br>(Perforation)         | Low<br>(16.7)                                                  |  | Twenty foreign workers and 30 local patients that<br>suffered from perforated peptic ulcers were compared to<br>each other to assess the difference in characteristics<br>between these two groups. Several characteristics were<br>significantly different, where foreign workers were on<br>average 18 years younger (mean age = 30.4), suffered<br>from smaller-sized ulcers, and experienced lower levels<br>of post-operative complications. |

## Tables

|    |                                  |                                              |                                        |                 |                                                                                                                                                                                            |                      |                                                      |                    |                                                                                                                                                                                                                                                                                                                                                                                       |
|----|----------------------------------|----------------------------------------------|----------------------------------------|-----------------|--------------------------------------------------------------------------------------------------------------------------------------------------------------------------------------------|----------------------|------------------------------------------------------|--------------------|---------------------------------------------------------------------------------------------------------------------------------------------------------------------------------------------------------------------------------------------------------------------------------------------------------------------------------------------------------------------------------------|
| 1  |                                  |                                              |                                        |                 |                                                                                                                                                                                            |                      |                                                      |                    |                                                                                                                                                                                                                                                                                                                                                                                       |
| 2  | Azian et al <sup>74</sup>        | Prevalence<br>(Des-2)                        | N/A <sup>2</sup>                       | Foreign workers | 2,153 samples <sup>12</sup><br>(1,422 Bangladeshi,<br>349 Indians, 201<br>Nepalese, 78<br>Indonesians, 58<br>Vietnamese, 45<br>Myanmar)                                                    | Disease &<br>injury  | Communicable<br>disease<br>(Parasite)                | Low<br>(11.1)      | A total of 2,153 blood samples were taken from migrant workers that were located in seven states of Peninsular Malaysia and were tested for leishmaniasis infection. More than half (55.3%) of the collected blood samples were found positive.                                                                                                                                       |
| 3  |                                  |                                              |                                        |                 |                                                                                                                                                                                            |                      |                                                      |                    |                                                                                                                                                                                                                                                                                                                                                                                       |
| 4  |                                  |                                              |                                        |                 |                                                                                                                                                                                            |                      |                                                      |                    |                                                                                                                                                                                                                                                                                                                                                                                       |
| 5  |                                  |                                              |                                        |                 |                                                                                                                                                                                            |                      |                                                      |                    |                                                                                                                                                                                                                                                                                                                                                                                       |
| 6  |                                  |                                              |                                        |                 |                                                                                                                                                                                            |                      |                                                      |                    |                                                                                                                                                                                                                                                                                                                                                                                       |
| 7  |                                  |                                              |                                        |                 |                                                                                                                                                                                            |                      |                                                      |                    |                                                                                                                                                                                                                                                                                                                                                                                       |
| 8  |                                  |                                              |                                        |                 |                                                                                                                                                                                            |                      |                                                      |                    |                                                                                                                                                                                                                                                                                                                                                                                       |
| 9  |                                  |                                              |                                        |                 |                                                                                                                                                                                            |                      |                                                      |                    |                                                                                                                                                                                                                                                                                                                                                                                       |
| 10 |                                  |                                              |                                        |                 |                                                                                                                                                                                            |                      |                                                      |                    |                                                                                                                                                                                                                                                                                                                                                                                       |
| 11 | Sahimin et al <sup>75</sup>      | Prevalence<br>(Des-2)                        | September<br>2014 to<br>August<br>2015 | Foreign workers | 388 people<br>(167 Indonesians, 81<br>Nepalese, 70<br>Bangladeshi, 47<br>Indians, 23 Myanmar)                                                                                              | Disease &<br>injury  | Communicable<br>disease<br>(Parasite)                | Low<br>(33.3)      | A cross-sectional study was conducted to examine the prevalence of different intestinal parasitic infections among foreign labour. Out of the 388 migrant workers, infection rates were between 52.1% and 84%. Higher infection rates significantly associated with migrants from Nepal and India, recently arrived in the country, and less than 1-year work experience in Malaysia. |
| 12 |                                  |                                              |                                        |                 |                                                                                                                                                                                            |                      |                                                      |                    |                                                                                                                                                                                                                                                                                                                                                                                       |
| 13 |                                  |                                              |                                        |                 |                                                                                                                                                                                            |                      |                                                      |                    |                                                                                                                                                                                                                                                                                                                                                                                       |
| 14 |                                  |                                              |                                        |                 |                                                                                                                                                                                            |                      |                                                      |                    |                                                                                                                                                                                                                                                                                                                                                                                       |
| 15 |                                  |                                              |                                        |                 |                                                                                                                                                                                            |                      |                                                      |                    |                                                                                                                                                                                                                                                                                                                                                                                       |
| 16 |                                  |                                              |                                        |                 |                                                                                                                                                                                            |                      |                                                      |                    |                                                                                                                                                                                                                                                                                                                                                                                       |
| 17 |                                  |                                              |                                        |                 |                                                                                                                                                                                            |                      |                                                      |                    |                                                                                                                                                                                                                                                                                                                                                                                       |
| 18 |                                  |                                              |                                        |                 |                                                                                                                                                                                            |                      |                                                      |                    |                                                                                                                                                                                                                                                                                                                                                                                       |
| 19 |                                  |                                              |                                        |                 |                                                                                                                                                                                            |                      |                                                      |                    |                                                                                                                                                                                                                                                                                                                                                                                       |
| 20 |                                  |                                              |                                        |                 |                                                                                                                                                                                            |                      |                                                      |                    |                                                                                                                                                                                                                                                                                                                                                                                       |
| 21 | Noh et al <sup>76</sup>          | Prevalence<br>(Des-2)                        | N/A <sup>2</sup>                       | Foreign workers | 600 foreign workers <sup>2</sup>                                                                                                                                                           | Living<br>conditions | Service environment<br>(Healthcare<br>utilisation)   | Low<br>(22.2)      | Data of 600 foreign workers was obtained to explore their healthcare utilisation. Most of them utilise health services occasionally (88.5%) and the majority (61.4%) goes to government hospitals.                                                                                                                                                                                    |
| 22 |                                  |                                              |                                        |                 |                                                                                                                                                                                            |                      |                                                      |                    |                                                                                                                                                                                                                                                                                                                                                                                       |
| 23 |                                  |                                              |                                        |                 |                                                                                                                                                                                            |                      |                                                      |                    |                                                                                                                                                                                                                                                                                                                                                                                       |
| 24 |                                  |                                              |                                        |                 |                                                                                                                                                                                            |                      |                                                      |                    |                                                                                                                                                                                                                                                                                                                                                                                       |
| 25 |                                  |                                              |                                        |                 |                                                                                                                                                                                            |                      |                                                      |                    |                                                                                                                                                                                                                                                                                                                                                                                       |
| 26 | Kamaludin &<br>How <sup>77</sup> | Analytical<br>cross-<br>sectional<br>(Obs-4) | February<br>2016 to<br>April 2016      | Foreign workers | 120 people <sup>2</sup><br>(60 foreign workers, 60<br>local workers)                                                                                                                       | Risk<br>behaviour    | Hazard & safety<br>awareness<br>(environmental risk) | Low<br>(50.0)      | The study compared environmental health awareness between 60 local workers and 60 migrant workers, where the latter group showed significant lower levels of awareness.                                                                                                                                                                                                               |
| 27 |                                  |                                              |                                        |                 |                                                                                                                                                                                            |                      |                                                      |                    |                                                                                                                                                                                                                                                                                                                                                                                       |
| 28 |                                  |                                              |                                        |                 |                                                                                                                                                                                            |                      |                                                      |                    |                                                                                                                                                                                                                                                                                                                                                                                       |
| 29 |                                  |                                              |                                        |                 |                                                                                                                                                                                            |                      |                                                      |                    |                                                                                                                                                                                                                                                                                                                                                                                       |
| 30 |                                  |                                              |                                        |                 |                                                                                                                                                                                            |                      |                                                      |                    |                                                                                                                                                                                                                                                                                                                                                                                       |
| 31 | Min et al <sup>78</sup>          | Prevalence<br>(Des-3)                        | January<br>2011 to<br>December<br>2013 | Foreign workers | 440 people<br>(46 Indonesians, 37<br>Bangladeshi, 33<br>Nepalese, 17 Myanmar,<br>11 Pakistani, 8 Others, <sup>2</sup><br>226 Malays, 32<br>Chinese, 20 Others, <sup>2</sup> 10<br>Indians) | Disease &<br>injury  | Injury<br>(Physical trauma)                          | Moderate<br>(62.5) | Medical records of the Hospital Sultan Ismail in Johor Bahru were reviewed between January 2011 and December 2013 to describe the prevalence of work-related ocular traumas. More than one-third of the ocular injuries were among foreign workers and contributed to two-third of the open eye traumas.                                                                              |
| 32 |                                  |                                              |                                        |                 |                                                                                                                                                                                            |                      |                                                      |                    |                                                                                                                                                                                                                                                                                                                                                                                       |
| 33 |                                  |                                              |                                        |                 |                                                                                                                                                                                            |                      |                                                      |                    |                                                                                                                                                                                                                                                                                                                                                                                       |
| 34 |                                  |                                              |                                        |                 |                                                                                                                                                                                            |                      |                                                      |                    |                                                                                                                                                                                                                                                                                                                                                                                       |
| 35 |                                  |                                              |                                        |                 |                                                                                                                                                                                            |                      |                                                      |                    |                                                                                                                                                                                                                                                                                                                                                                                       |
| 36 |                                  |                                              |                                        |                 |                                                                                                                                                                                            |                      |                                                      |                    |                                                                                                                                                                                                                                                                                                                                                                                       |
| 37 |                                  |                                              |                                        |                 |                                                                                                                                                                                            |                      |                                                      |                    |                                                                                                                                                                                                                                                                                                                                                                                       |
| 38 |                                  |                                              |                                        |                 |                                                                                                                                                                                            |                      |                                                      |                    |                                                                                                                                                                                                                                                                                                                                                                                       |
| 39 |                                  |                                              |                                        |                 |                                                                                                                                                                                            |                      |                                                      |                    |                                                                                                                                                                                                                                                                                                                                                                                       |
| 40 |                                  |                                              |                                        |                 |                                                                                                                                                                                            |                      |                                                      |                    |                                                                                                                                                                                                                                                                                                                                                                                       |
| 41 |                                  |                                              |                                        |                 |                                                                                                                                                                                            |                      |                                                      |                    |                                                                                                                                                                                                                                                                                                                                                                                       |
| 42 |                                  |                                              |                                        |                 |                                                                                                                                                                                            |                      |                                                      |                    |                                                                                                                                                                                                                                                                                                                                                                                       |
| 43 |                                  |                                              |                                        |                 |                                                                                                                                                                                            |                      |                                                      |                    |                                                                                                                                                                                                                                                                                                                                                                                       |
| 44 |                                  |                                              |                                        |                 |                                                                                                                                                                                            |                      |                                                      |                    |                                                                                                                                                                                                                                                                                                                                                                                       |
| 45 |                                  |                                              |                                        |                 |                                                                                                                                                                                            |                      |                                                      |                    |                                                                                                                                                                                                                                                                                                                                                                                       |
| 46 |                                  |                                              |                                        |                 |                                                                                                                                                                                            |                      |                                                      |                    |                                                                                                                                                                                                                                                                                                                                                                                       |



## Tables

|    |                            |                      |                  |                 |                                |            |                      |        |                                                                                                                                                                                                                                                                                                                                                                                                                                                                |
|----|----------------------------|----------------------|------------------|-----------------|--------------------------------|------------|----------------------|--------|----------------------------------------------------------------------------------------------------------------------------------------------------------------------------------------------------------------------------------------------------------------------------------------------------------------------------------------------------------------------------------------------------------------------------------------------------------------|
| 1  |                            |                      |                  |                 |                                |            |                      |        |                                                                                                                                                                                                                                                                                                                                                                                                                                                                |
| 2  | Woh et al <sup>79</sup>    | Prevalence           | N/A <sup>2</sup> | Foreign workers | 317 people                     | Disease &  | Communicable         | Low    | A cross-sectional study was conducted among 317 migrant food handlers from Ipoh, Kuala Terengganu, and Shah Alam to assess the Salmonella prevalence of this group, resulting in nine (2.8%) people testing positive. Seven out of these 9 cases presented multidrug resistance towards trimethoprim-sulfamethoxazole (6 cases), streptomycin (7 cases), ampicillin (4 cases), chloramphenicol (4 cases), sulphonamides (6 cases), and tetracycline (7 cases). |
| 3  |                            | (Des-3)              |                  |                 | (140 Indians, 80               | injury     | disease              | (44.4) |                                                                                                                                                                                                                                                                                                                                                                                                                                                                |
| 4  |                            |                      |                  |                 | Nepalese, 36                   |            | (Bacteria)           |        |                                                                                                                                                                                                                                                                                                                                                                                                                                                                |
| 5  |                            |                      |                  |                 | Indonesians, 29                |            |                      |        |                                                                                                                                                                                                                                                                                                                                                                                                                                                                |
| 6  |                            |                      |                  |                 | Bangladeshi, 18                |            |                      |        |                                                                                                                                                                                                                                                                                                                                                                                                                                                                |
| 7  |                            |                      |                  |                 | Myanmar, 7 Pakistani,          |            |                      |        |                                                                                                                                                                                                                                                                                                                                                                                                                                                                |
| 8  |                            |                      |                  |                 | 4 Sri Lankans, 2               |            |                      |        |                                                                                                                                                                                                                                                                                                                                                                                                                                                                |
| 9  |                            |                      |                  |                 | Vietnamese, 1 Thai)            |            |                      |        |                                                                                                                                                                                                                                                                                                                                                                                                                                                                |
| 10 |                            |                      |                  |                 |                                |            |                      |        |                                                                                                                                                                                                                                                                                                                                                                                                                                                                |
| 11 |                            |                      |                  |                 |                                |            |                      |        |                                                                                                                                                                                                                                                                                                                                                                                                                                                                |
| 12 |                            |                      |                  |                 |                                |            |                      |        |                                                                                                                                                                                                                                                                                                                                                                                                                                                                |
| 13 |                            |                      |                  |                 |                                |            |                      |        |                                                                                                                                                                                                                                                                                                                                                                                                                                                                |
| 14 | Tanabe et al <sup>80</sup> | Mixed-               | N/A <sup>2</sup> | Asylum seekers  | Participants per               | Living     | Service environment  | N/A    |                                                                                                                                                                                                                                                                                                                                                                                                                                                                |
| 15 |                            | method <sup>10</sup> |                  | & refugees      | method <sup>9</sup>            | conditions | (Healthcare          |        |                                                                                                                                                                                                                                                                                                                                                                                                                                                                |
| 16 |                            |                      |                  |                 | (422 Myanmar - survey;         |            | utilisation)         |        |                                                                                                                                                                                                                                                                                                                                                                                                                                                                |
| 17 |                            |                      |                  |                 | 66 Myanmar - focus             |            |                      |        |                                                                                                                                                                                                                                                                                                                                                                                                                                                                |
| 18 |                            |                      |                  |                 | group; 6 people <sup>2</sup> - |            |                      |        |                                                                                                                                                                                                                                                                                                                                                                                                                                                                |
| 19 |                            |                      |                  |                 | interviews; 4 facility         |            |                      |        |                                                                                                                                                                                                                                                                                                                                                                                                                                                                |
| 20 |                            |                      |                  |                 | assessments)                   |            |                      |        |                                                                                                                                                                                                                                                                                                                                                                                                                                                                |
| 21 |                            |                      |                  |                 |                                |            |                      |        |                                                                                                                                                                                                                                                                                                                                                                                                                                                                |
| 22 |                            |                      |                  |                 |                                |            |                      |        |                                                                                                                                                                                                                                                                                                                                                                                                                                                                |
| 23 | Ratnalingam                | Prevalence           | N/A <sup>2</sup> | Foreign workers | 207 patients <sup>2</sup>      | Disease &  | Communicable         | Low    |                                                                                                                                                                                                                                                                                                                                                                                                                                                                |
| 24 | et al <sup>81</sup>        | (Des-2)              |                  |                 |                                | injury     | disease              | (33.3) |                                                                                                                                                                                                                                                                                                                                                                                                                                                                |
| 25 |                            |                      |                  |                 |                                |            | (Bacteria)           |        |                                                                                                                                                                                                                                                                                                                                                                                                                                                                |
| 26 |                            |                      |                  |                 |                                |            |                      |        |                                                                                                                                                                                                                                                                                                                                                                                                                                                                |
| 27 |                            |                      |                  |                 |                                |            |                      |        |                                                                                                                                                                                                                                                                                                                                                                                                                                                                |
| 28 |                            |                      |                  |                 |                                |            |                      |        |                                                                                                                                                                                                                                                                                                                                                                                                                                                                |
| 29 |                            |                      |                  |                 |                                |            |                      |        |                                                                                                                                                                                                                                                                                                                                                                                                                                                                |
| 30 |                            |                      |                  |                 |                                |            |                      |        |                                                                                                                                                                                                                                                                                                                                                                                                                                                                |
| 31 | Woh et al <sup>82</sup>    | Prevalence           | N/A <sup>2</sup> | Foreign workers | 383 swab samples <sup>12</sup> | Risk       | Hygiene & sanitation | Low    |                                                                                                                                                                                                                                                                                                                                                                                                                                                                |
| 32 |                            | (Des-2)              |                  |                 | (Indians, Nepalese,            | behaviour  | (Food preparation)   | (22.2) |                                                                                                                                                                                                                                                                                                                                                                                                                                                                |
| 33 |                            |                      |                  |                 | Indonesians,                   |            |                      |        |                                                                                                                                                                                                                                                                                                                                                                                                                                                                |
| 34 |                            |                      |                  |                 | Bangladeshi, Myanmar,          |            |                      |        |                                                                                                                                                                                                                                                                                                                                                                                                                                                                |
| 35 |                            |                      |                  |                 | Pakistani, Sri Lankans,        |            |                      |        |                                                                                                                                                                                                                                                                                                                                                                                                                                                                |
| 36 |                            |                      |                  |                 | Thai, Vietnamese)              |            |                      |        |                                                                                                                                                                                                                                                                                                                                                                                                                                                                |
| 37 |                            |                      |                  |                 |                                |            |                      |        |                                                                                                                                                                                                                                                                                                                                                                                                                                                                |
| 38 |                            |                      |                  |                 |                                |            |                      |        |                                                                                                                                                                                                                                                                                                                                                                                                                                                                |
| 39 |                            |                      |                  |                 |                                |            |                      |        |                                                                                                                                                                                                                                                                                                                                                                                                                                                                |
| 40 |                            |                      |                  |                 |                                |            |                      |        |                                                                                                                                                                                                                                                                                                                                                                                                                                                                |
| 41 |                            |                      |                  |                 |                                |            |                      |        |                                                                                                                                                                                                                                                                                                                                                                                                                                                                |
| 42 |                            |                      |                  |                 |                                |            |                      |        |                                                                                                                                                                                                                                                                                                                                                                                                                                                                |
| 43 |                            |                      |                  |                 |                                |            |                      |        |                                                                                                                                                                                                                                                                                                                                                                                                                                                                |
| 44 |                            |                      |                  |                 |                                |            |                      |        |                                                                                                                                                                                                                                                                                                                                                                                                                                                                |
| 45 |                            |                      |                  |                 |                                |            |                      |        |                                                                                                                                                                                                                                                                                                                                                                                                                                                                |
| 46 |                            |                      |                  |                 |                                |            |                      |        |                                                                                                                                                                                                                                                                                                                                                                                                                                                                |

## Tables

|                             |                                                  |                               |                 |                                                                                                          |                  |                                 |                 |  |                                                                                                                                                                                                                                                                                                                                                                                                                                                         |
|-----------------------------|--------------------------------------------------|-------------------------------|-----------------|----------------------------------------------------------------------------------------------------------|------------------|---------------------------------|-----------------|--|---------------------------------------------------------------------------------------------------------------------------------------------------------------------------------------------------------------------------------------------------------------------------------------------------------------------------------------------------------------------------------------------------------------------------------------------------------|
|                             |                                                  |                               |                 |                                                                                                          |                  |                                 |                 |  | significant higher rates were found among cooks, followed by waiters, compared to managers.                                                                                                                                                                                                                                                                                                                                                             |
| Noor & Shaker <sup>83</sup> | Analytical cross-sectional (Obs-4) <sup>13</sup> | N/A <sup>2</sup>              | Foreign workers | 119 Indonesians                                                                                          | Disease & injury | Mental health (Stress)          | High (85.7)     |  | A sample of 119 migrant workers were examined to explore the relationship between psychological distress and workplace discrimination, and the effect of coping strategy on stress levels. The study showed that workplace discrimination increased levels of stress. In addition, problem-oriented coping strategies were related to lower stress levels, while the emotional and avoidance coping strategy was associated to higher levels of stress. |
| Noordin et al <sup>84</sup> | Prevalence (Des-3)                               | September 2014 to August 2015 | Foreign workers | 484 foreign labour (246 Indonesians, 103 Nepalese, 69 Bangladeshi, 51 Indians, 14 Myanmar, 1 Vietnamese) | Disease & injury | Communicable disease (Parasite) | Low (33.3)      |  | Lymphatic filariasis prevalence among foreign labour was determined by screening 484 migrant workers, showing that 6.8% and 2.1% suffered from bancroftian filariasis and brugian filariasis, respectively.                                                                                                                                                                                                                                             |
| Sahimin et al <sup>85</sup> | Prevalence (Des-2)                               | September 2014 to August 2015 | Foreign workers | 484 people (247 Indonesians, 99 Nepalese, 72 Bangladeshi, 52 Indians, 14 Myanmar)                        | Disease & injury | Communicable disease (Parasite) | Low (44.4)      |  | A total of 484 foreign workers were sampled to describe the prevalence of <i>Toxoplasma gondii</i> and factors related to higher infection rates. In total, 278 migrant workers (57.4%) tested positive for <i>T gondii</i> , where significant higher levels of infection were associated with Nepalese origin, newly arrived in Malaysia, and working in manufacturing.                                                                               |
| Labao et al <sup>86</sup>   | Prevalence (Des-3)                               | N/A <sup>2</sup>              | Foreign workers | 60 Filipinos                                                                                             | Disease & injury | Injury (Physical syndrome)      | Moderate (55.6) |  | A cross-sectional study was conducted to investigate which body regions were presenting the most work-related musculoskeletal complaints among migrant workers. The major affected areas included the shoulder (60%), lower back (60%), upper back (48.3%), and neck (45%) regions.                                                                                                                                                                     |

## Tables

|                               |                                     |                               |                                    |                                                                                                                                                                                |                  |                                       |                 |                                                                                                                                                                                                                                                                                                                                                                                                                                                                                                              |
|-------------------------------|-------------------------------------|-------------------------------|------------------------------------|--------------------------------------------------------------------------------------------------------------------------------------------------------------------------------|------------------|---------------------------------------|-----------------|--------------------------------------------------------------------------------------------------------------------------------------------------------------------------------------------------------------------------------------------------------------------------------------------------------------------------------------------------------------------------------------------------------------------------------------------------------------------------------------------------------------|
| Shaw et al <sup>87</sup>      | Randomised controlled trial (Exp-2) | N/A <sup>2</sup>              | Asylum seekers & refugees          | 39 <i>Afghans</i>                                                                                                                                                              | Disease & injury | Mental health (Stress)                | Low (30.8)      | In order to assess the impact of cognitive behavioural therapy (CBT) on emotional distress, an 8-week intervention was conducted among 39 female refugees. As a result, the intervention significantly lowered levels of posttraumatic stress, anxiety, emotional distress, and depression.                                                                                                                                                                                                                  |
| Rahman et al <sup>88</sup>    | Case control (Obs-3)                | N/A <sup>2</sup>              | Unclassified migrants <sup>4</sup> | 61 <i>people</i> (52 <i>Myanmar</i> , 9 <i>Others</i> <sup>2</sup> )                                                                                                           | Risk behaviour   | Poor nutrition (Nutrition deficiency) | Moderate (60.0) | A case control study was conducted to determine the factors that were related to bilateral leg swelling among detained irregular migrants. Out of the 226 inmates, 21 Myanmar were identified as cases and were compared to 41 controls from Myanmar, Indonesia, Nepal, and Vietnam. The study showed that the illness was caused due to a thiamine deficiency, as the patients lacked the consumption of meat. Intravenous and oral thiamine treatment was provided, and the patients responded well to it. |
| Sahimin et al <sup>89</sup>   | Prevalence (Des-2)                  | September 2014 to August 2015 | Foreign workers                    | 388 <i>people</i> (167 <i>Indonesians</i> , 81 <i>Nepalese</i> , 70 <i>Bangladeshi</i> , 47 <i>Indians</i> , 23 <i>Myanmar</i> )                                               | Disease & injury | Communicable disease (Parasite)       | Low (44.4)      | A sample of 388 foreign workers were examined to describe the prevalence of <i>Giardia duodenalis</i> and <i>Cryptosporidium parvum</i> , showing that 42 people (10.8%) and 12 people (3.1%) tested positive, respectively. Indonesian nationality, work in the manufacturing and service sector, and newly arrived in Malaysia were significantly associated with <i>G. duodenalis</i> , while <i>C. parvum</i> was only significantly associated with employment in the food industry.                    |
| Nwabichie et al <sup>90</sup> | Prevalence (Des-2)                  | N/A <sup>2</sup>              | Unclassified migrants              | 320 <i>people</i> <sup>2</sup> (50% <i>Nigerians</i> , 15% <i>Ghanaians</i> , 35% <i>Others</i> [from <i>Sudan</i> , <i>Tanzania</i> , <i>Kenya</i> and <i>South Africa</i> ]) | Risk behaviour   | Sexual behaviour (HPV knowledge)      | High (77.8)     | In total, 320 African female migrants were surveyed to investigate risk factors that are related to higher HPV risk behaviour. Only 27.2% of the sample obtained cervical cancer screening, where higher levels of screening were significantly associated with having knowledge regarding cervical cancer, being married, having a standard health                                                                                                                                                          |

## Tables

|                              |                                              |                                      |                              |                                                                                                 |                      |                                                    |                    |                                                                                                                                                                                                                                                                                                                                                                                                                                                                                                        |
|------------------------------|----------------------------------------------|--------------------------------------|------------------------------|-------------------------------------------------------------------------------------------------|----------------------|----------------------------------------------------|--------------------|--------------------------------------------------------------------------------------------------------------------------------------------------------------------------------------------------------------------------------------------------------------------------------------------------------------------------------------------------------------------------------------------------------------------------------------------------------------------------------------------------------|
|                              |                                              |                                      |                              |                                                                                                 |                      |                                                    |                    | care provider, and no perceived barriers when obtaining the check-up.                                                                                                                                                                                                                                                                                                                                                                                                                                  |
| Jeffree et al <sup>91</sup>  | Case control<br>(Obs-3)                      | N/A <sup>2</sup>                     | Foreign workers              | 470 people <sup>2</sup>                                                                         | Disease &<br>injury  | Communicable<br>disease<br>(Parasite)              | Moderate<br>(60.0) | A case-control study was conducted to determine the risk factors related to a malaria outbreak, where rubber tappers – including one migrant worker – presented a higher infection rate.                                                                                                                                                                                                                                                                                                               |
| Zerguine et al <sup>92</sup> | Analytical<br>cross-<br>sectional<br>(Obs-4) | June 2016<br>to<br>September<br>2016 | Foreign workers              | 323 people<br>(155 Bangladeshi, 126<br>Indonesians, 25<br>Pakistani, 11 Nepalese,<br>6 Chinese) | Disease &<br>injury  | Injury<br>(Physical trauma)                        | Moderate<br>(57.1) | A total of 323 migrant workers were sampled to investigate the prevalence and causes of workplace injuries, and examine the relationship between these traumas and safety commitment variables. The study showed that 22.6% of the foreign workers suffered from a work-related injury, mostly due to falls from heights (31.5%), and that there was a significant association between various injuries and different safety commitment-related variables, such as safe equipment and safety training. |
| Ya'acob et al <sup>93</sup>  | Randomised<br>controlled<br>Trial<br>(Exp-2) | N/A <sup>2</sup>                     | Foreign workers              | 54 Indonesians                                                                                  | Disease &<br>injury  | Injury<br>(Physical syndrome)                      | Low<br>(38.5)      | A workplace intervention was conducted to assess the effect of Kiken Yochi training on musculoskeletal symptoms among foreign workers, where the study showed that the intervention significantly decreased musculoskeletal symptoms in feet and ankle areas compared to the control group.                                                                                                                                                                                                            |
| Chuah et al <sup>9</sup>     | Qualitative<br>(Qual-2)                      | July 2016 to<br>November<br>2017     | Asylum seekers<br>& refugees | 20 stakeholders <sup>14</sup>                                                                   | Living<br>conditions | Service environment<br>(Healthcare<br>utilisation) | High<br>(80.0)     | Twenty stakeholders were interviewed to explore the barriers that refugees and asylum seekers encounter during healthcare utilisation, showing that cultural competency, insufficient health literacy, healthcare expenses, and not being aware of their rights were the main challenges.                                                                                                                                                                                                              |

## Tables

|    |                           |             |                  |                 |                                           |            |                     |        |                                                                                                                                                                                                                                                                                                                                                                                                                                                                |
|----|---------------------------|-------------|------------------|-----------------|-------------------------------------------|------------|---------------------|--------|----------------------------------------------------------------------------------------------------------------------------------------------------------------------------------------------------------------------------------------------------------------------------------------------------------------------------------------------------------------------------------------------------------------------------------------------------------------|
| 1  |                           |             |                  |                 |                                           |            |                     |        |                                                                                                                                                                                                                                                                                                                                                                                                                                                                |
| 2  | Loganathan et             | Qualitative | July 2018 to     | Foreign workers | 18 stakeholders <sup>14</sup>             | Living     | Service environment | High   | A qualitative study with 18 stakeholders demonstrated that migrant workers face several complications with respect to utilising healthcare, including financial issues, discrimination, lack of valid passports and work permits, cultural competency, and physical barriers.                                                                                                                                                                                  |
| 3  | al <sup>94</sup>          | (Qual-2)    | September        |                 |                                           | conditions | (Healthcare         | (80.0) |                                                                                                                                                                                                                                                                                                                                                                                                                                                                |
| 4  |                           |             | 2018             |                 |                                           |            | utilisation)        |        |                                                                                                                                                                                                                                                                                                                                                                                                                                                                |
| 5  |                           |             |                  |                 |                                           |            |                     |        |                                                                                                                                                                                                                                                                                                                                                                                                                                                                |
| 6  |                           |             |                  |                 |                                           |            |                     |        |                                                                                                                                                                                                                                                                                                                                                                                                                                                                |
| 7  |                           |             |                  |                 |                                           |            |                     |        |                                                                                                                                                                                                                                                                                                                                                                                                                                                                |
| 8  |                           |             |                  |                 |                                           |            |                     |        |                                                                                                                                                                                                                                                                                                                                                                                                                                                                |
| 9  | Rahman et                 | Prevalence  | N/A <sup>2</sup> | Foreign workers | <i>314 Bangladeshi</i>                    | Living     | Service environment | Low    | A group of 314 migrant workers were sampled to present the distribution of diseases and healthcare utilisation pattern. Fever and sprains were the most reported diseases among the group that suffered from an illness in the last two weeks, while fever and gastrointestinal diseases were the most prevalent among the group that suffered from an illness in the last month. In addition, the majority (approx. 60%) visited hospitals to seek treatment. |
| 10 | al <sup>95</sup>          | (Des-3)     |                  |                 |                                           | conditions | (Healthcare         | (33.3) |                                                                                                                                                                                                                                                                                                                                                                                                                                                                |
| 11 |                           |             |                  |                 |                                           | Disease &  | Various diseases    |        |                                                                                                                                                                                                                                                                                                                                                                                                                                                                |
| 12 |                           |             |                  |                 |                                           | injury     | (various diseases)  |        |                                                                                                                                                                                                                                                                                                                                                                                                                                                                |
| 13 |                           |             |                  |                 |                                           |            |                     |        |                                                                                                                                                                                                                                                                                                                                                                                                                                                                |
| 14 |                           |             |                  |                 |                                           |            |                     |        |                                                                                                                                                                                                                                                                                                                                                                                                                                                                |
| 15 |                           |             |                  |                 |                                           |            |                     |        |                                                                                                                                                                                                                                                                                                                                                                                                                                                                |
| 16 |                           |             |                  |                 |                                           |            |                     |        |                                                                                                                                                                                                                                                                                                                                                                                                                                                                |
| 17 |                           |             |                  |                 |                                           |            |                     |        |                                                                                                                                                                                                                                                                                                                                                                                                                                                                |
| 18 |                           |             |                  |                 |                                           |            |                     |        |                                                                                                                                                                                                                                                                                                                                                                                                                                                                |
| 19 |                           |             |                  |                 |                                           |            |                     |        |                                                                                                                                                                                                                                                                                                                                                                                                                                                                |
| 20 |                           |             |                  |                 |                                           |            |                     |        |                                                                                                                                                                                                                                                                                                                                                                                                                                                                |
| 21 | Siah et al <sup>96</sup>  | Qualitative | N/A <sup>2</sup> | Asylum seekers  | 8 stakeholders                            | Living     | Social environment  | Low    | Eight people stakeholders were interviewed to explore the forms of discrimination that refugee children experience. The study shows that refugee children suffer from denied access to health care, not receiving proper education, and being judged by their social environment.                                                                                                                                                                              |
| 22 |                           | (Qual-3)    |                  | & refugees      | <i>(5 refugees,<sup>2</sup> 3 locals)</i> | conditions | (Prejudice)         | (50.0) |                                                                                                                                                                                                                                                                                                                                                                                                                                                                |
| 23 |                           |             |                  |                 |                                           |            |                     |        |                                                                                                                                                                                                                                                                                                                                                                                                                                                                |
| 24 |                           |             |                  |                 |                                           |            |                     |        |                                                                                                                                                                                                                                                                                                                                                                                                                                                                |
| 25 |                           |             |                  |                 |                                           |            |                     |        |                                                                                                                                                                                                                                                                                                                                                                                                                                                                |
| 26 |                           |             |                  |                 |                                           |            |                     |        |                                                                                                                                                                                                                                                                                                                                                                                                                                                                |
| 27 | Sahimin et                | Prevalence  | September        | Foreign workers | <i>610 people</i>                         | Disease &  | Communicable        | Low    | Four different diagnostic tests were applied to identify Strongyloides stercoralis among migrant workers, where prevalence rates differed between 0.8% and 35.8%                                                                                                                                                                                                                                                                                               |
| 28 | al <sup>97</sup>          | (Des-2)     | 2014 and         |                 | <i>(246 Indonesians, 99</i>               | injury     | disease             | (33.3) |                                                                                                                                                                                                                                                                                                                                                                                                                                                                |
| 29 |                           |             | August           |                 | <i>Nepalese, 72</i>                       |            | (Parasite)          |        |                                                                                                                                                                                                                                                                                                                                                                                                                                                                |
| 30 |                           |             | 2015             |                 | <i>Bangladeshi, 52</i>                    |            |                     |        |                                                                                                                                                                                                                                                                                                                                                                                                                                                                |
| 31 |                           |             |                  |                 | <i>Indians, 14 Myanmar)</i>               |            |                     |        |                                                                                                                                                                                                                                                                                                                                                                                                                                                                |
| 32 |                           |             |                  |                 |                                           |            |                     |        |                                                                                                                                                                                                                                                                                                                                                                                                                                                                |
| 33 |                           |             |                  |                 |                                           |            |                     |        |                                                                                                                                                                                                                                                                                                                                                                                                                                                                |
| 34 | Chuah et al <sup>98</sup> | Qualitative | July 2016 to     | Asylum seekers  | 20 stakeholders <sup>14</sup>             | Living     | Service environment | High   | Twenty stakeholders were interviewed to identify the challenges with respect to accessing healthcare among refugees, showing that out of pocket healthcare spending, language and cultural competency barriers, and access to medication are the top healthcare challenges.                                                                                                                                                                                    |
| 35 |                           | (Qual-2)    | January          | & refugees      |                                           | conditions | (Healthcare         | (80.0) |                                                                                                                                                                                                                                                                                                                                                                                                                                                                |
| 36 |                           |             | 2018             |                 |                                           |            | utilisation)        |        |                                                                                                                                                                                                                                                                                                                                                                                                                                                                |
| 37 |                           |             |                  |                 |                                           |            |                     |        |                                                                                                                                                                                                                                                                                                                                                                                                                                                                |
| 38 |                           |             |                  |                 |                                           |            |                     |        |                                                                                                                                                                                                                                                                                                                                                                                                                                                                |
| 39 |                           |             |                  |                 |                                           |            |                     |        |                                                                                                                                                                                                                                                                                                                                                                                                                                                                |
| 40 |                           |             |                  |                 |                                           |            |                     |        |                                                                                                                                                                                                                                                                                                                                                                                                                                                                |

\*Sample population in *italic* represents the migrant population;

## Tables

1  
2 \*\*The following abbreviations are used in the table: N/A = Data not available; HPV = Human Papilloma Virus

3  
4 <sup>1</sup>Includes irregular migrants.

5  
6 <sup>2</sup>Data to present detailed information is lacking.

7  
8 <sup>3</sup>Includes children of migrant workers, which is according to the IOM (2011) definition still classified as migrant workers

9  
10 <sup>4</sup>Includes detained migrants.

11  
12 <sup>5</sup>Includes refugees, international students, expats, and unclassified migrants.

13  
14 <sup>6</sup>Includes 3 expats; <sup>7</sup>Includes 6 transnational marriage migrants.

15  
16 <sup>8</sup>Ambiguous reporting of the data.

17  
18 <sup>9</sup>Includes a multiple-country study, and, therefore, subjects that were included in countries other than Malaysia are not reported in this table.

19  
20 <sup>10</sup>Level of evidence and quality appraisal is not available for this study design.

21  
22 <sup>11</sup>Includes an international student.

23  
24 <sup>12</sup>Number of samples might not be similar to the number of study participants.

25  
26 <sup>13</sup>Despite of lacking a comparison group, this study was identified as an analytical cross-sectional study due to the aim – testing two hypotheses – and comprehensive statistical analysis.

27  
28 <sup>14</sup>Representing the population of interest (as shown in the ‘type of migrant’ category).

## Tables

Table 5. Number and average quality of included articles disaggregated by type of migrant and BARHII dimensions.

| Category                                         | Number of studies per study design with level of evidence |      |      |      |      |      |      |      |      | Total # studies | Mean quality | References                                                           |
|--------------------------------------------------|-----------------------------------------------------------|------|------|------|------|------|------|------|------|-----------------|--------------|----------------------------------------------------------------------|
|                                                  | CR-4                                                      | AC-4 | QL-3 | CS-3 | PR-3 | CC-3 | QL-2 | PR-2 | RC-2 |                 |              |                                                                      |
| <i>Type of migrant</i>                           |                                                           |      |      |      |      |      |      |      |      |                 |              |                                                                      |
| Asylum seekers & refugees                        | -                                                         | 1    | 1    | -    | 1    | -    | 3    | 2    | 1    | 10 <sup>1</sup> | 58.4%        | 9 33 34 63 64 71 80 87 96 98                                         |
| Foreign workers                                  | 4                                                         | 7    | -    | 4    | 10   | 1    | 1    | 12   | 1    | 41 <sup>2</sup> | 45.7%        | 37 40 43 44 46-56 58-60 66 69 72-79 81-86 89 91-95 97                |
| Unclassified migrants                            | -                                                         | 1    | -    | 6    | 2    | 2    | -    | 5    | -    | 16              | 52.7%        | 35 36 38 39 41 42 45 57 61 62 65 67 68 70 88 90                      |
| <i>Dimension of BARHII framework</i>             |                                                           |      |      |      |      |      |      |      |      |                 |              |                                                                      |
| Institutional inequities                         | -                                                         | -    | -    | -    | -    | -    | -    | -    | -    | 1 <sup>2</sup>  | -            | 72                                                                   |
| Living conditions                                | -                                                         | 2    | 1    | -    | 1    | -    | 4    | 2    | -    | 11 <sup>1</sup> | 59.7%        | 9 36 63 64 69 76 80 94-96 98                                         |
| Risk behaviour                                   | -                                                         | 1    | -    | 3    | 1    | 1    | -    | 4    | -    | 10              | 48.7%        | 35 38 41 61 62 67 77 82 88 90                                        |
| Disease & injury                                 | 4                                                         | 6    | -    | 7    | 11   | 2    | -    | 14   | 2    | 46              | 46.3%        | 33 34 37 39 40 43-60 65 66 68-71 73-75 78 79 81 83-87 89 91-93 95 97 |
| Mortality & morbidity                            | -                                                         | 1    | -    | -    | 1    | -    | -    | -    | -    | 2               | 47.9%        | 36 42                                                                |
| <i>Subdimensions of institutional inequities</i> |                                                           |      |      |      |      |      |      |      |      |                 |              |                                                                      |
| Laws & regulations                               | -                                                         | -    | -    | -    | -    | -    | -    | -    | -    | 1 <sup>2</sup>  | -            | 72                                                                   |
| <i>Subdimensions of living conditions</i>        |                                                           |      |      |      |      |      |      |      |      |                 |              |                                                                      |
| Social environment                               | -                                                         | -    | 1    | -    | -    | -    | -    | -    | -    | 1               | 50.0%        | 96                                                                   |
| Economic and work environment                    | -                                                         | -    | -    | -    | -    | -    | -    | 1    | -    | 1               | 44.4%        | 69                                                                   |
| Service environment                              | -                                                         | 2    | -    | -    | 1    | -    | 4    | 1    | -    | 9 <sup>1</sup>  | 62.8%        | 9 36 63 64 76 80 94 95 98                                            |
| <i>Subdimensions of risk behaviour</i>           |                                                           |      |      |      |      |      |      |      |      |                 |              |                                                                      |
| Poor nutrition                                   | -                                                         | -    | -    | 1    | -    | 1    | -    | -    | -    | 2               | 50.0%        | 38 88                                                                |
| Violence & abuse                                 | -                                                         | -    | -    | 2    | -    | -    | -    | -    | -    | 2               | 70.0%        | 35 67                                                                |
| Alcohol & other drugs                            | -                                                         | -    | -    | -    | -    | -    | -    | 1    | -    | 1               | 22.2%        | 41                                                                   |
| Sexual behaviour                                 | -                                                         | -    | -    | -    | 1    | -    | -    | 2    | -    | 3               | 50.9%        | 61 62 90                                                             |
| Hygiene & sanitation                             | -                                                         | -    | -    | -    | -    | -    | -    | 1    | -    | 1               | 22.2%        | 82                                                                   |
| Hazard & safety awareness                        | -                                                         | 1    | -    | -    | -    | -    | -    | -    | -    | 1               | 50.0%        | 77                                                                   |
| <i>Subdimensions of disease &amp; injury</i>     |                                                           |      |      |      |      |      |      |      |      |                 |              |                                                                      |
| Communicable disease                             | 3                                                         | 2    | -    | 6    | 4    | 2    | -    | 10   | -    | 27              | 44.2%        | 34 37 39 43-45 47-52 55 59 60 65 68 70 74 75 79 81 84 85 89 91 97    |
| Non-communicable disease                         | 1                                                         | 1    | -    | -    | 1    | -    | -    | -    | -    | 3               | 50.8%        | 33 53 73                                                             |

## Tables

|                                                   |          |          |          |           |           |          |          |           |          |                         |              |                            |
|---------------------------------------------------|----------|----------|----------|-----------|-----------|----------|----------|-----------|----------|-------------------------|--------------|----------------------------|
| Injury                                            | -        | 2        | -        | 1         | 3         | -        | -        | 2         | 1        | 9                       | 47.4%        | 54 56 58 66 69 78 86 92 93 |
| Mental health                                     | -        | 1        | -        | -         | 1         | -        | -        | 2         | 1        | 5                       | 56.1%        | 40 57 71 83 87             |
| Various diseases                                  | -        | -        | -        | -         | 2         | -        | -        | -         | -        | 2                       | 38.9%        | 46 95                      |
| <i>Subdimensions of mortality &amp; morbidity</i> |          |          |          |           |           |          |          |           |          |                         |              |                            |
| Mortality rates                                   | -        | 1        | -        | -         | -         | -        | -        | -         | -        | 1                       | 33.3%        | 36                         |
| Morbidity rates                                   | -        | -        | -        | -         | 1         | -        | -        | -         | -        | 1                       | 62.5%        | 42                         |
| <b>Total</b>                                      | <b>4</b> | <b>9</b> | <b>1</b> | <b>10</b> | <b>13</b> | <b>3</b> | <b>4</b> | <b>19</b> | <b>2</b> | <b>67<sup>1,2</sup></b> | <b>49.2%</b> | <b>9 33-98</b>             |

\*Abbreviations for the type of study with the related level of evidence (the number after the dash) are used to describe the included studies: CR-4 = case report; AC-4 = analytical cross-sectional study; QL-3 = qualitative study with less rigour; CS-3 = case series; PR-3 = prevalence study without analytical component; CC-3 = case control; QL-2 = qualitative study with more rigour; PR-2 = prevalence study with analytical component; RC-2 = randomised controlled trial.

\*\*Level of evidence ranks from 1 to 4, where 1 is the highest level of evidence and 4 is the lowest level.

<sup>1</sup>Includes a mixed-method design, which was not appraised for level of evidence nor quality of the study;

<sup>2</sup>Includes a scoping review design, which was not appraised for level of evidence nor quality of the study.



## Tables

Table 6. Number and average quality of included articles disaggregated by research design category.

| Research design                                          | Level of evidence | Included studies      | Mean quality | References                                                                 |
|----------------------------------------------------------|-------------------|-----------------------|--------------|----------------------------------------------------------------------------|
| <i>Descriptive research</i>                              |                   |                       |              |                                                                            |
| Systematic review of descriptive studies                 | 1                 | -                     | -            | -                                                                          |
| Prevalence study with analytical component               | 2                 | 19                    | 39.7%        | 34 41 47 55 57 58 62 69-71 74-76 81 82 85 89 90 97                         |
| Case series                                              | 3                 | 10                    | 46.7%        | 35 38 39 45 48 51 54 60 65 67                                              |
| Prevalence study without analytical component            | 3                 | 13                    | 49.8%        | 33 37 40 42 44 46 61 66 78 79 84 86 95                                     |
| Case report                                              | 4                 | 4                     | 81.5%        | 43 49 53 59                                                                |
| Total                                                    |                   | 46                    | 47.7%        | 33-35 37-49 51 53-55 57-62 65-67 69-71 74-76 78 79 81 82 84-86 89 90 95 97 |
| <i>Experimental research</i>                             |                   |                       |              |                                                                            |
| Systematic review/meta-analysis of experimental studies  | 1                 | -                     | -            | -                                                                          |
| Randomised controlled trial                              | 2                 | 2                     | 34.7%        | 87 93                                                                      |
| Group quasi-experimental study (non-randomised)          | 3                 | -                     | -            | -                                                                          |
| Quasi-experimental study with single subject             | 4                 | -                     | -            | -                                                                          |
| Total                                                    |                   | 2                     | 34.7%        | 87 93                                                                      |
| <i>Observational research</i>                            |                   |                       |              |                                                                            |
| Systematic review/meta-analysis of observational studies | 1                 | -                     | -            | -                                                                          |
| Cohort study                                             | 2                 | -                     | -            | -                                                                          |
| Case-control                                             | 3                 | 3                     | 56.7%        | 68 88 91                                                                   |
| Analytical cross-sectional study                         | 4                 | 9                     | 42.6%        | 36 50 52 56 64 73 77 83 92                                                 |
| Total                                                    |                   | 12                    | 46.1%        | 36 50 52 56 64 68 73 77 83 88 91 92                                        |
| <i>Qualitative research</i>                              |                   |                       |              |                                                                            |
| Systematic review/meta-synthesis of qualitative studies  | 1                 | -                     | -            | -                                                                          |
| Group qualitative studies with more rigor                | 2                 | 4                     | 82.5%        | 9 63 94 98                                                                 |
| Group qualitative studies with less rigor                | 3                 | 1                     | 50.0%        | 96                                                                         |
| Qualitative study with a single informant                | 4                 | -                     | -            | -                                                                          |
| Total                                                    |                   | 5                     | 76.0%        | 9 63 94 96 98                                                              |
| <b>Total</b>                                             |                   | <b>67<sup>1</sup></b> | <b>49.2%</b> | <b>9 33-98</b>                                                             |

<sup>1</sup>Includes a mixed-method design and a scoping review, which were both not assessed for the level of evidence nor quality appraisal.

## Tables

Table 7. Main recommendations to improve future research on migrant health.

| Recommendation                                                                                                                                                                                                                                                                                                                                                                                                      |
|---------------------------------------------------------------------------------------------------------------------------------------------------------------------------------------------------------------------------------------------------------------------------------------------------------------------------------------------------------------------------------------------------------------------|
| Improve the description of the target migrant population by including information regarding the type of migrant (e.g., foreign worker, refugee), visa status (e.g., regular, irregular), country of origin, socioeconomic variables (e.g., level of education, income), mode of transport during migration journey (e.g., boat, car), and the existence of forced entry (e.g., human trafficking, forced marriage). |
| Create associations between different stages of migration (pre-departure, travel, destination, interception, and return phase) and health outcomes.                                                                                                                                                                                                                                                                 |
| More research output concerning governance and institutional inequities and mortality and morbidity, and, consequently, conduct a time series analysis between these two dimensions to identify and possible relationships.                                                                                                                                                                                         |
| More research output regarding non-communicable diseases, especially on the main causes of death in Malaysia; cardiovascular diseases, chronic respiratory diseases, and diabetes.                                                                                                                                                                                                                                  |
| More research output concerning several subdimension of risk behaviour, especially on smoking, physical inactivity, and alcohol abuse.                                                                                                                                                                                                                                                                              |
| Evaluate the impact of health and non-health policies on migrant health.                                                                                                                                                                                                                                                                                                                                            |
| Explore living conditions regarding the physical environment, such as housing and environmental conditions, and the impact on migrant health outcomes.                                                                                                                                                                                                                                                              |
| Promotion of guidelines on study conduct and reporting among researchers.                                                                                                                                                                                                                                                                                                                                           |

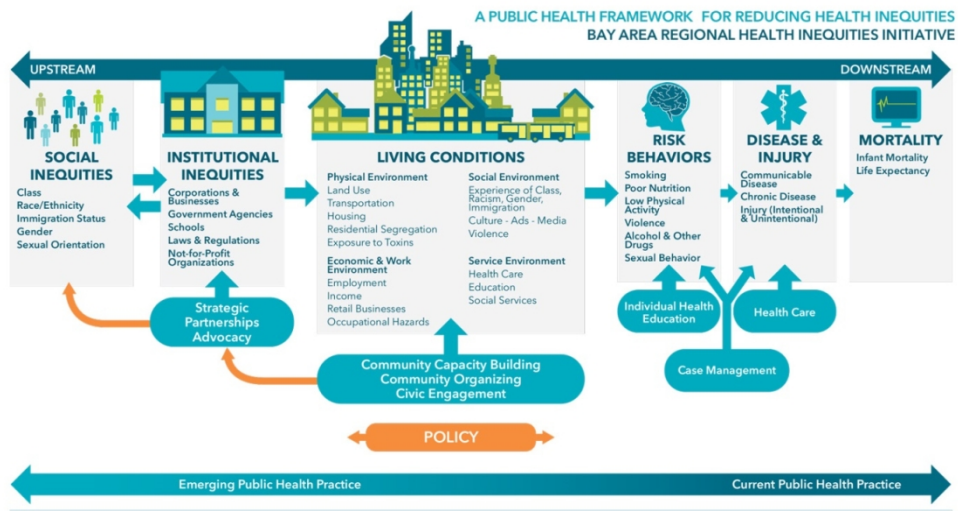

Figure 1. Bay Area Regional Health Inequities Initiative (BARHII) framework.

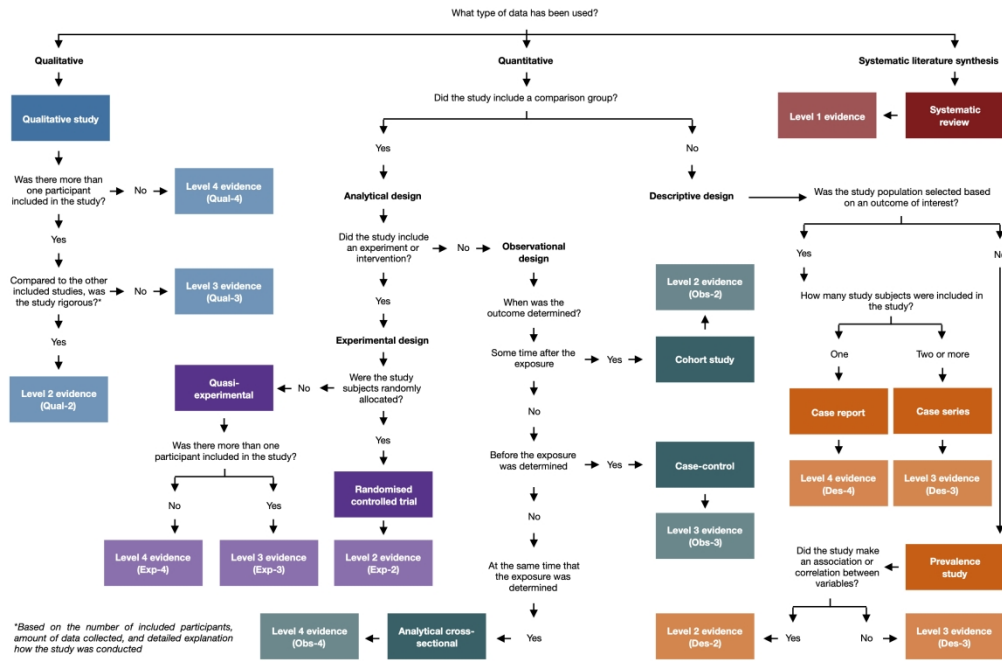

Figure 2. Decision tree to identify the type of study design and corresponding level of evidence.

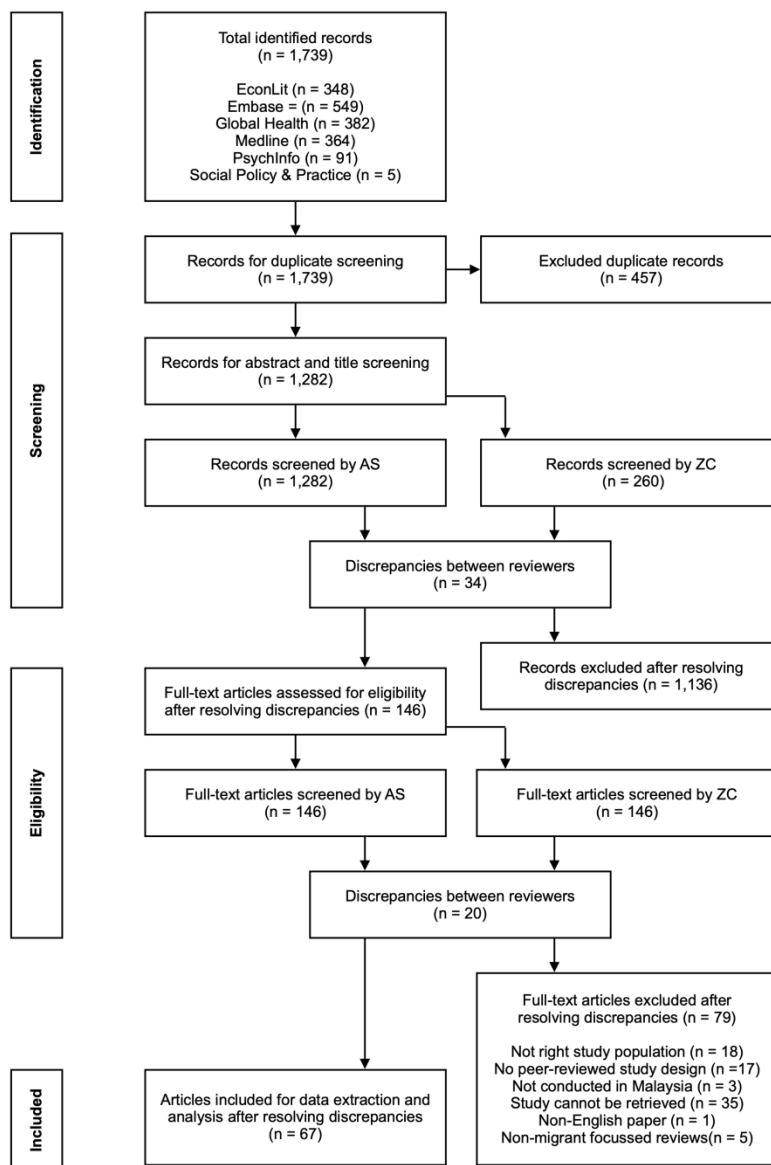

Figure 3. Flowchart of the data selection process.

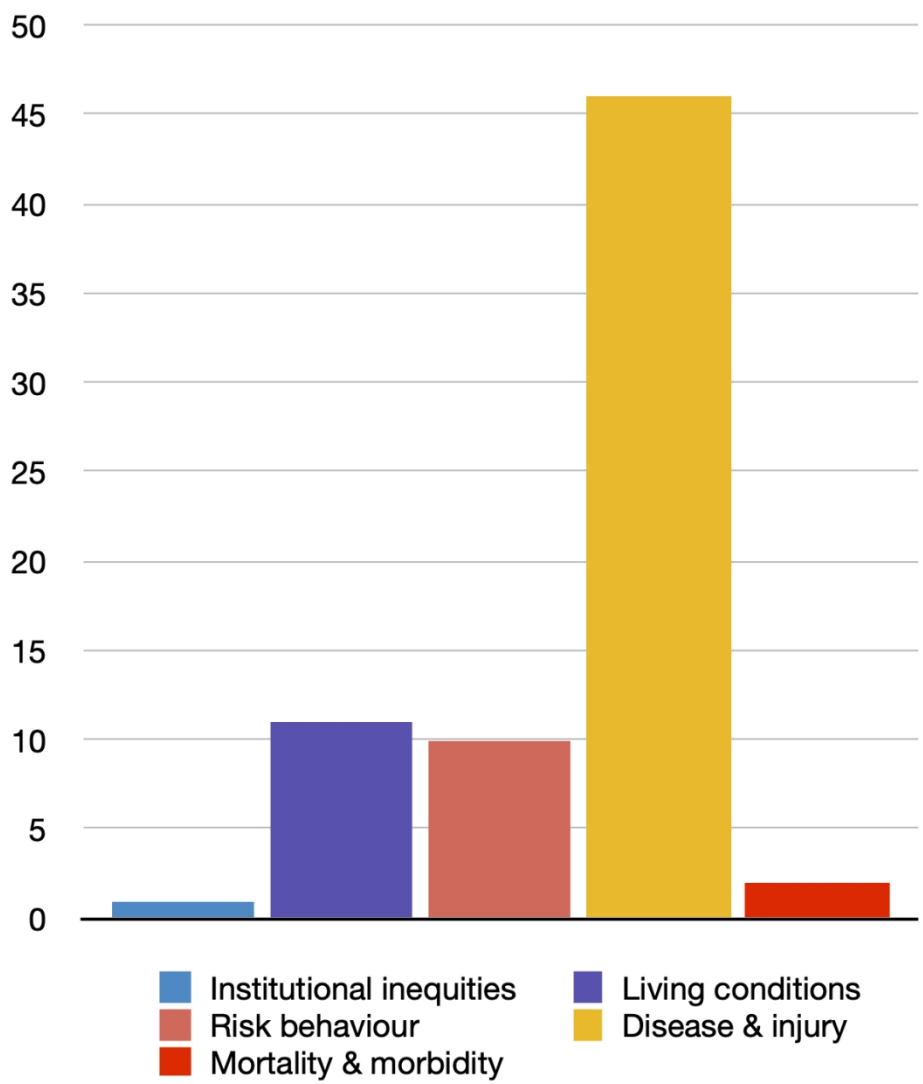

Figure 4. Number of studies disaggregated by health dimension.

1  
2  
3  
4  
5  
6  
7  
8  
9  
10  
11  
12  
13  
14  
15  
16  
17  
18  
19  
20  
21  
22  
23  
24  
25  
26  
27  
28  
29  
30  
31  
32  
33  
34  
35  
36  
37  
38  
39  
40  
41  
42  
43  
44  
45  
46  
47  
48  
49  
50  
51  
52  
53  
54  
55  
56  
57  
58  
59  
60

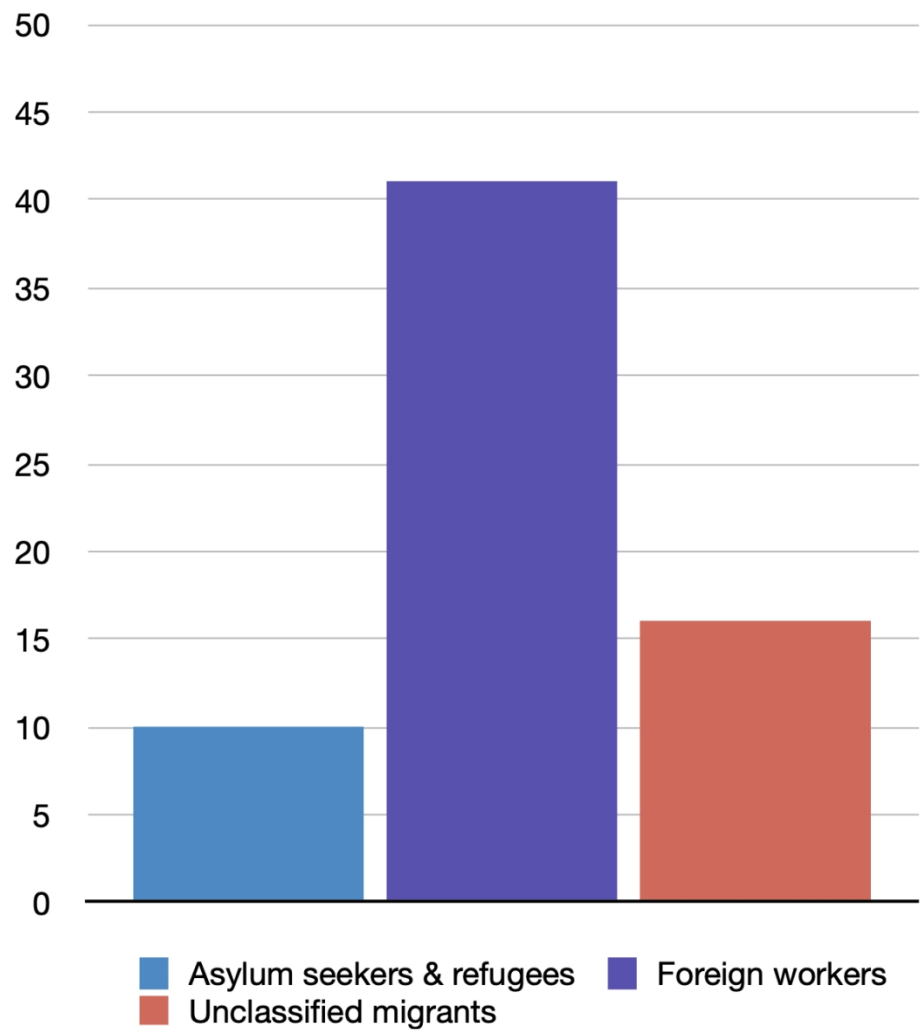

Figure 5. Number of studies disaggregated by type of migrant.

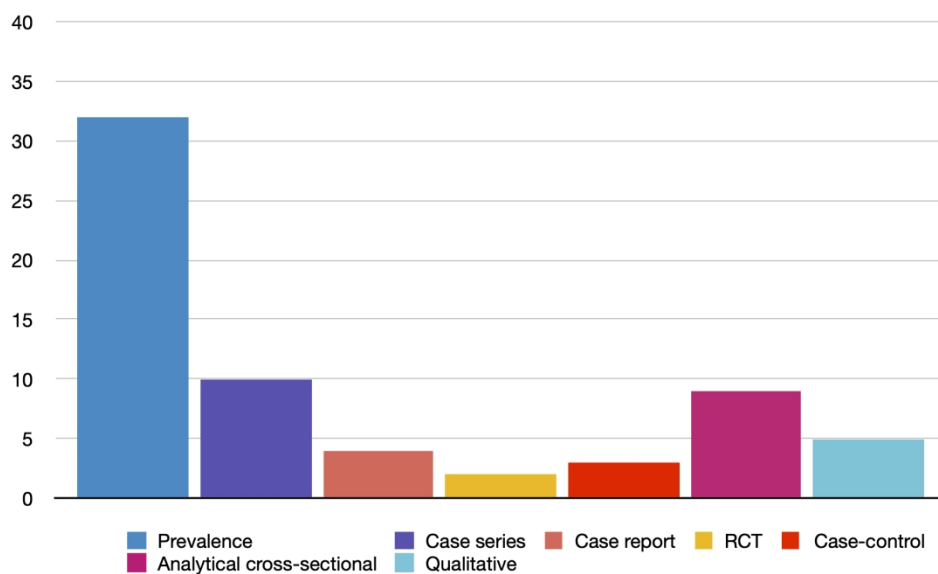

Figure 6. Number of studies disaggregated by research design.



1  
2  
3  
4  
5  
6  
7  
8  
9  
10  
11  
12  
13  
14  
15  
16  
17  
18  
19  
20  
21  
22  
23  
24  
25  
26  
27  
28  
29  
30  
31  
32  
33  
34  
35  
36  
37  
38  
39  
40  
41  
42  
43  
44  
45  
46  
47  
48  
49  
50  
51  
52  
53  
54  
55  
56  
57  
58  
59  
60

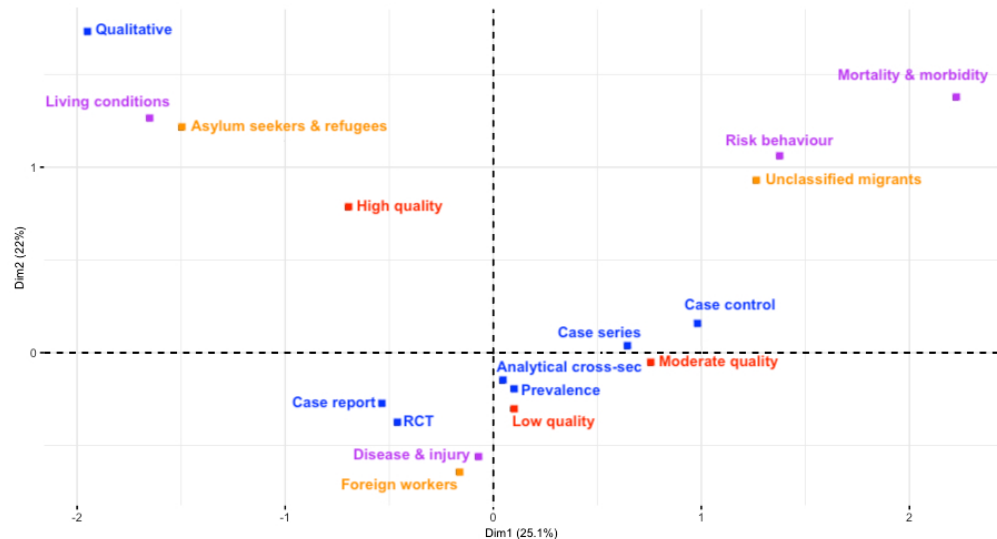

Figure 7. Results of the multiple-correspondence analysis (MCA).

317x173mm (72 x 72 DPI)

## Preferred Reporting Items for Systematic reviews and Meta-Analyses extension for Scoping Reviews (PRISMA-ScR) Checklist

| SECTION                                               | ITEM | PRISMA-ScR CHECKLIST ITEM                                                                                                                                                                                                                                                                                  | REPORTED ON PAGE # |
|-------------------------------------------------------|------|------------------------------------------------------------------------------------------------------------------------------------------------------------------------------------------------------------------------------------------------------------------------------------------------------------|--------------------|
| <b>TITLE</b>                                          |      |                                                                                                                                                                                                                                                                                                            |                    |
| Title                                                 | 1    | Identify the report as a scoping review.                                                                                                                                                                                                                                                                   |                    |
| <b>ABSTRACT</b>                                       |      |                                                                                                                                                                                                                                                                                                            |                    |
| Structured summary                                    | 2    | Provide a structured summary that includes (as applicable): background, objectives, eligibility criteria, sources of evidence, charting methods, results, and conclusions that relate to the review questions and objectives.                                                                              |                    |
| <b>INTRODUCTION</b>                                   |      |                                                                                                                                                                                                                                                                                                            |                    |
| Rationale                                             | 3    | Describe the rationale for the review in the context of what is already known. Explain why the review questions/objectives lend themselves to a scoping review approach.                                                                                                                                   |                    |
| Objectives                                            | 4    | Provide an explicit statement of the questions and objectives being addressed with reference to their key elements (e.g., population or participants, concepts, and context) or other relevant key elements used to conceptualize the review questions and/or objectives.                                  |                    |
| <b>METHODS</b>                                        |      |                                                                                                                                                                                                                                                                                                            |                    |
| Protocol and registration                             | 5    | Indicate whether a review protocol exists; state if and where it can be accessed (e.g., a Web address); and if available, provide registration information, including the registration number.                                                                                                             |                    |
| Eligibility criteria                                  | 6    | Specify characteristics of the sources of evidence used as eligibility criteria (e.g., years considered, language, and publication status), and provide a rationale.                                                                                                                                       |                    |
| Information sources*                                  | 7    | Describe all information sources in the search (e.g., databases with dates of coverage and contact with authors to identify additional sources), as well as the date the most recent search was executed.                                                                                                  |                    |
| Search                                                | 8    | Present the full electronic search strategy for at least 1 database, including any limits used, such that it could be repeated.                                                                                                                                                                            |                    |
| Selection of sources of evidence†                     | 9    | State the process for selecting sources of evidence (i.e., screening and eligibility) included in the scoping review.                                                                                                                                                                                      |                    |
| Data charting process‡                                | 10   | Describe the methods of charting data from the included sources of evidence (e.g., calibrated forms or forms that have been tested by the team before their use, and whether data charting was done independently or in duplicate) and any processes for obtaining and confirming data from investigators. |                    |
| Data items                                            | 11   | List and define all variables for which data were sought and any assumptions and simplifications made.                                                                                                                                                                                                     |                    |
| Critical appraisal of individual sources of evidence§ | 12   | If done, provide a rationale for conducting a critical appraisal of included sources of evidence; describe the methods used and how this information was used in any data synthesis (if appropriate).                                                                                                      |                    |
| Synthesis of results                                  | 13   | Describe the methods of handling and summarizing the data that were charted.                                                                                                                                                                                                                               |                    |



| SECTION                                       | ITEM | PRISMA-ScR CHECKLIST ITEM                                                                                                                                                                       | REPORTED ON PAGE # |
|-----------------------------------------------|------|-------------------------------------------------------------------------------------------------------------------------------------------------------------------------------------------------|--------------------|
| <b>RESULTS</b>                                |      |                                                                                                                                                                                                 |                    |
| Selection of sources of evidence              | 14   | Give numbers of sources of evidence screened, assessed for eligibility, and included in the review, with reasons for exclusions at each stage, ideally using a flow diagram.                    |                    |
| Characteristics of sources of evidence        | 15   | For each source of evidence, present characteristics for which data were charted and provide the citations.                                                                                     |                    |
| Critical appraisal within sources of evidence | 16   | If done, present data on critical appraisal of included sources of evidence (see item 12).                                                                                                      |                    |
| Results of individual sources of evidence     | 17   | For each included source of evidence, present the relevant data that were charted that relate to the review questions and objectives.                                                           |                    |
| Synthesis of results                          | 18   | Summarize and/or present the charting results as they relate to the review questions and objectives.                                                                                            |                    |
| <b>DISCUSSION</b>                             |      |                                                                                                                                                                                                 |                    |
| Summary of evidence                           | 19   | Summarize the main results (including an overview of concepts, themes, and types of evidence available), link to the review questions and objectives, and consider the relevance to key groups. |                    |
| Limitations                                   | 20   | Discuss the limitations of the scoping review process.                                                                                                                                          |                    |
| Conclusions                                   | 21   | Provide a general interpretation of the results with respect to the review questions and objectives, as well as potential implications and/or next steps.                                       |                    |
| <b>FUNDING</b>                                |      |                                                                                                                                                                                                 |                    |
| Funding                                       | 22   | Describe sources of funding for the included sources of evidence, as well as sources of funding for the scoping review. Describe the role of the funders of the scoping review.                 |                    |

JBI = Joanna Briggs Institute; PRISMA-ScR = Preferred Reporting Items for Systematic reviews and Meta-Analyses extension for Scoping Reviews.

\* Where *sources of evidence* (see second footnote) are compiled from, such as bibliographic databases, social media platforms, and Web sites.

† A more inclusive/heterogeneous term used to account for the different types of evidence or data sources (e.g., quantitative and/or qualitative research, expert opinion, and policy documents) that may be eligible in a scoping review as opposed to only studies. This is not to be confused with *information sources* (see first footnote).

‡ The frameworks by Arksey and O'Malley (6) and Levac and colleagues (7) and the JBI guidance (4, 5) refer to the process of data extraction in a scoping review as data charting.

§ The process of systematically examining research evidence to assess its validity, results, and relevance before using it to inform a decision. This term is used for items 12 and 19 instead of "risk of bias" (which is more applicable to systematic reviews of interventions) to include and acknowledge the various sources of evidence that may be used in a scoping review (e.g., quantitative and/or qualitative research, expert opinion, and policy document).

From: Tricco AC, Lillie E, Zarin W, O'Brien KK, Colquhoun H, Levac D, et al. PRISMA Extension for Scoping Reviews (PRISMA-ScR): Checklist and Explanation. *Ann Intern Med.* 2018;169:467–473. doi: [10.7326/M18-0850](https://doi.org/10.7326/M18-0850).



## Supplementary file 2. Detailed search strategy

### I.1. EconLit

|                            |                            |
|----------------------------|----------------------------|
| Database name              | EconLit                    |
| Database search engine     | OvidSP                     |
| Dates of database coverage | 1886 to September 12, 2019 |
| Date search conducted      | 17 September 2019          |
| Total number of hits       | 348                        |

| # | Searches                                                                                                                                                                                                                                                                                                                                                                                                                                                                                                                                                                                                                                                                                                                                                                                                                                                                                                                                                                                                                                                                                                                                                                                                                                                                                                                                                                                                                                                                                                  | Results |
|---|-----------------------------------------------------------------------------------------------------------------------------------------------------------------------------------------------------------------------------------------------------------------------------------------------------------------------------------------------------------------------------------------------------------------------------------------------------------------------------------------------------------------------------------------------------------------------------------------------------------------------------------------------------------------------------------------------------------------------------------------------------------------------------------------------------------------------------------------------------------------------------------------------------------------------------------------------------------------------------------------------------------------------------------------------------------------------------------------------------------------------------------------------------------------------------------------------------------------------------------------------------------------------------------------------------------------------------------------------------------------------------------------------------------------------------------------------------------------------------------------------------------|---------|
| 1 | asylum* OR displaced OR emigra* OR emigre* OR foreign born OR foreign labor OR foreign labour OR foreign work* OR foreign-born OR foreign-work* OR foreigner* OR immigra* OR migra* OR people of concern OR person of concern OR persons of concern OR refugee* OR smuggl* OR traffick* OR transient* OR transmigrant*                                                                                                                                                                                                                                                                                                                                                                                                                                                                                                                                                                                                                                                                                                                                                                                                                                                                                                                                                                                                                                                                                                                                                                                    | 120,090 |
| 2 | abnormalit* OR abortion* OR abscess* OR accident* OR ache* OR aids OR ailment* OR alcohol* OR allerg* OR anorexia OR AMR OR antibiotic resistan* OR antimicrobial resistan* OR anxiet* OR allerg* OR apnoea OR arthritis OR ascariasis OR assault* OR asthma OR attack* OR bacteri* OR bipolar OR bite* OR blastoma* OR bleed* OR blind OR blood OR burn* OR cancer* OR cardio* OR Chagas OR chlamydia OR cholesterol OR coma OR complication* OR condition* OR condom* OR contraception OR cyst* OR dead OR deaf OR death* OR decay OR deform* OR dehydrat* OR dementia OR dengue OR depress* OR diabetes OR diarrhoea OR disabilit* OR disease* OR disorder* OR dracunculiasis OR drug* OR dysfunction* OR eczema OR enlargement* OR epilep* OR exhaust* OR failure OR fatal* OR fatigue OR fever* OR filariasis OR flu OR gall stone* gallstone* OR gonorrhoea OR headache* OR health OR healthcare OR hearing loss OR helminth* OR hepatitis OR hernia* OR herpe* OR HIV OR hookworm* OR HPV OR hypertension OR illness* OR indigestion* OR infect* OR inflame* OR injur* OR leishmaniasis OR leprosy OR leukaemia OR leukemia OR lice OR life expectancy OR malaria OR malformat* OR malnutrition OR measles OR medical OR melanoma* OR mental* OR migraine OR miscarriage* OR morbidit* OR mortalit* OR muscl* OR myeloma OR nausea OR neuro* OR nutrition* OR onchocerciasis OR osteoarthritis OR osteoporosis OR pain* OR parasite* OR patient care OR physical activ* OR pneumonia OR poison* OR | 373,019 |

|    |                                                                                                                                                                                                                                                                                                                                                                                                                                                                                                                                                                                                        |         |
|----|--------------------------------------------------------------------------------------------------------------------------------------------------------------------------------------------------------------------------------------------------------------------------------------------------------------------------------------------------------------------------------------------------------------------------------------------------------------------------------------------------------------------------------------------------------------------------------------------------------|---------|
|    | psoriasis OR psychiatric OR psychos* OR rabies OR rape* OR reproductiv* OR rheuma* OR ringworm* OR sarcoma* OR scabies OR schistosomiasis OR schizophren* OR seizure* OR sepsis* OR sexual* OR shock* OR sick* OR smoking OR sore* OR STD* OR stillbirth* OR stress* OR stroke* OR suicid* OR sunburn* OR syndrome* OR syphilis OR TB OR thrombosis OR tobacco OR STI* OR toothache* OR trachoma OR trauma* OR trichuriasis OR trichomoniasis OR trypanosomiasis OR tuberculosis OR tumor* OR tumour* OR ulcer* OR violence OR virus* OR vomit* OR wart* OR well-being OR wellbeing OR worm* OR wound* |         |
|    |                                                                                                                                                                                                                                                                                                                                                                                                                                                                                                                                                                                                        |         |
| 3  | Malaysia OR Johor OR Kedah OR Kelantan OR Kuala Lumpur OR Labuan OR Malacca OR Melaka OR Malaya OR Negeri Sembilan OR Pahang OR Penang OR Perak OR Perlis OR Putrajaya OR Sabah OR Sarawak OR Selangor OR Terengganu                                                                                                                                                                                                                                                                                                                                                                                   | 6,883   |
| 4  | Malaysian                                                                                                                                                                                                                                                                                                                                                                                                                                                                                                                                                                                              | 1,654   |
| 5  | area* OR Borneo OR city OR cities OR district* OR island* OR isle* OR province* OR region* OR state* OR territor* OR village*                                                                                                                                                                                                                                                                                                                                                                                                                                                                          | 367,269 |
| 6  | 4 AND 5                                                                                                                                                                                                                                                                                                                                                                                                                                                                                                                                                                                                | 361     |
| 7  | 3 OR 6                                                                                                                                                                                                                                                                                                                                                                                                                                                                                                                                                                                                 | 6,925   |
|    |                                                                                                                                                                                                                                                                                                                                                                                                                                                                                                                                                                                                        |         |
| 8  | 1 AND 2 AND 7                                                                                                                                                                                                                                                                                                                                                                                                                                                                                                                                                                                          | 348     |
|    |                                                                                                                                                                                                                                                                                                                                                                                                                                                                                                                                                                                                        |         |
| 9  | Animal migration OR bird migration OR cell* OR membrane* OR molecu*                                                                                                                                                                                                                                                                                                                                                                                                                                                                                                                                    | 2,622   |
| 10 | 8 NOT 9                                                                                                                                                                                                                                                                                                                                                                                                                                                                                                                                                                                                | 348     |

## I.2. Embase

|                            |                           |
|----------------------------|---------------------------|
| Database name              | Embase                    |
| Database search engine     | OvidSP                    |
| Dates of database coverage | 1947 to 2019 September 13 |
| Date search conducted      | 17 September 2019         |
| Total number of hits       | 549                       |

| #  | Searches                                                                                                                                                                                                                                                                                                               | Results    |
|----|------------------------------------------------------------------------------------------------------------------------------------------------------------------------------------------------------------------------------------------------------------------------------------------------------------------------|------------|
| 1  | asylum* OR displaced OR emigra* OR emigre* OR foreign born OR foreign labor OR foreign labour OR foreign work* OR foreign-born OR foreign-work* OR foreigner* OR immigra* OR migra* OR people of concern OR person of concern OR persons of concern OR refugee* OR smuggl* OR traffick* OR transient* OR transmigrant* | 1,124,805  |
| 2  | asylum seeker [MeSH]                                                                                                                                                                                                                                                                                                   | 793        |
| 3  | emigrant [MeSH]                                                                                                                                                                                                                                                                                                        | 293        |
| 4  | foreign worker [MeSH]                                                                                                                                                                                                                                                                                                  | 5,306      |
| 5  | human trafficking [MeSH]                                                                                                                                                                                                                                                                                               | 697        |
| 6  | migrant worker [MeSH]                                                                                                                                                                                                                                                                                                  | 1,548      |
| 7  | migrant [MeSH]                                                                                                                                                                                                                                                                                                         | 35,567     |
| 8  | migration [MeSH]                                                                                                                                                                                                                                                                                                       | 45,436     |
| 9  | immigrant [MeSH]                                                                                                                                                                                                                                                                                                       | 16,376     |
| 10 | refugee [MeSH]                                                                                                                                                                                                                                                                                                         | 12,425     |
| 11 | refugee camp [MeSH]                                                                                                                                                                                                                                                                                                    | 553        |
| 12 | undocumented immigrant [MeSH]                                                                                                                                                                                                                                                                                          | 350        |
| 13 | 1 OR 2 OR 3 OR 4 OR 5 OR 6 OR 7 OR 8 OR 9 OR 10 OR 11 OR 12                                                                                                                                                                                                                                                            | 1,125,119  |
| 14 | abnormalit* OR abortion* OR abscess* OR accident* OR ache* OR aids OR ailment* OR alcohol* OR allerg* OR anorexia OR AMR OR antibiotic resistan* OR antimicrobial resistan* OR anxiet* OR allerg* OR apnoea OR arthritis OR ascariasis OR assault* OR asthma OR attack* OR bacteri* OR bipolar OR bite* OR blastoma*   | 31,271,711 |

|    |                                                                                                                                                                                                                                                                                                                                                                                                                                                                                                                                                                                                                                                                                                                                                                                                                                                                                                                                                                                                                                                                                                                                                                                                                                                                                                                                                                                                                                                                                                                                                                                                                                                                                                                                                                                          |            |
|----|------------------------------------------------------------------------------------------------------------------------------------------------------------------------------------------------------------------------------------------------------------------------------------------------------------------------------------------------------------------------------------------------------------------------------------------------------------------------------------------------------------------------------------------------------------------------------------------------------------------------------------------------------------------------------------------------------------------------------------------------------------------------------------------------------------------------------------------------------------------------------------------------------------------------------------------------------------------------------------------------------------------------------------------------------------------------------------------------------------------------------------------------------------------------------------------------------------------------------------------------------------------------------------------------------------------------------------------------------------------------------------------------------------------------------------------------------------------------------------------------------------------------------------------------------------------------------------------------------------------------------------------------------------------------------------------------------------------------------------------------------------------------------------------|------------|
|    | OR bleed* OR blind OR blood OR burn* OR cancer* OR cardio* OR Chagas OR chlamydia OR cholesterol OR coma OR complication* OR condition* OR condom* OR contraception OR cyst* OR dead OR deaf OR death* OR decay OR deform* OR dehydrat* OR dementia OR dengue OR depress* OR diabetes OR diarrhoea OR disabilit* OR disease* OR disorder* OR dracunculiasis OR drug* OR dysfunction* OR eczema OR enlargement* OR epilep* OR exhaust* OR failure OR fatal* OR fatigue OR fever* OR filariasis OR flu OR gall stone* gallstone* OR gonorrhoea OR headache* OR health OR healthcare OR hearing loss OR helminth* OR hepatitis OR hernia* OR herpe* OR HIV OR hookworm* OR HPV OR hypertension OR illness* OR indigestion* OR infect* OR inflame* OR injur* OR leishmaniasis OR leprosy OR leukaemia OR leukemia OR lice OR life expectancy OR malaria OR malformat* malnutrition OR measles OR medical OR melanoma* OR mental* OR migraine OR miscarriage* OR morbidit* OR mortalit* OR muscl* OR myeloma OR nausea OR neuro* OR nutrition* OR onchocerciasis OR osteoarthritis OR osteoporosis OR pain* OR parasite* OR patient care OR physical activ* OR pneumonia OR poison* OR psoriasis OR psychiatric OR psychos* OR rabies OR rape* OR reproductiv* OR rheuma* OR ringworm* OR sarcoma* OR scabies OR schistosomiasis OR schizophren* OR seizure* OR sepsis* OR sexual* OR shock* OR sick* OR smoking OR sore* OR STD* OR stillbirth* OR stress* OR stroke* OR suicid* OR sunburn* OR syndrome* OR syphilis OR TB OR thrombosis OR tobacco OR STI* OR toothache* OR trachoma OR trauma* OR trichuriasis OR trichomoniasis OR trypanosomiasis OR tuberculosis OR tumor* OR tumour* OR ulcer* OR violence OR virus* OR vomit* OR wart* OR well-being OR wellbeing OR worm* OR wound* |            |
| 15 | accident [MeSH]                                                                                                                                                                                                                                                                                                                                                                                                                                                                                                                                                                                                                                                                                                                                                                                                                                                                                                                                                                                                                                                                                                                                                                                                                                                                                                                                                                                                                                                                                                                                                                                                                                                                                                                                                                          | 209,815    |
| 16 | diseases [MeSH]                                                                                                                                                                                                                                                                                                                                                                                                                                                                                                                                                                                                                                                                                                                                                                                                                                                                                                                                                                                                                                                                                                                                                                                                                                                                                                                                                                                                                                                                                                                                                                                                                                                                                                                                                                          | 23,553,673 |
| 17 | health [MeSH]                                                                                                                                                                                                                                                                                                                                                                                                                                                                                                                                                                                                                                                                                                                                                                                                                                                                                                                                                                                                                                                                                                                                                                                                                                                                                                                                                                                                                                                                                                                                                                                                                                                                                                                                                                            | 688,819    |
| 18 | health behavior [MeSH]                                                                                                                                                                                                                                                                                                                                                                                                                                                                                                                                                                                                                                                                                                                                                                                                                                                                                                                                                                                                                                                                                                                                                                                                                                                                                                                                                                                                                                                                                                                                                                                                                                                                                                                                                                   | 396,908    |
| 19 | health care [MeSH]                                                                                                                                                                                                                                                                                                                                                                                                                                                                                                                                                                                                                                                                                                                                                                                                                                                                                                                                                                                                                                                                                                                                                                                                                                                                                                                                                                                                                                                                                                                                                                                                                                                                                                                                                                       | 5,107,719  |
| 20 | health care facility [MeSH]                                                                                                                                                                                                                                                                                                                                                                                                                                                                                                                                                                                                                                                                                                                                                                                                                                                                                                                                                                                                                                                                                                                                                                                                                                                                                                                                                                                                                                                                                                                                                                                                                                                                                                                                                              | 1,641,961  |
| 21 | health care policy [MeSH]                                                                                                                                                                                                                                                                                                                                                                                                                                                                                                                                                                                                                                                                                                                                                                                                                                                                                                                                                                                                                                                                                                                                                                                                                                                                                                                                                                                                                                                                                                                                                                                                                                                                                                                                                                | 188,812    |
| 22 | health service [MeSH]                                                                                                                                                                                                                                                                                                                                                                                                                                                                                                                                                                                                                                                                                                                                                                                                                                                                                                                                                                                                                                                                                                                                                                                                                                                                                                                                                                                                                                                                                                                                                                                                                                                                                                                                                                    | 5,405,209  |
| 23 | infection [MeSH]                                                                                                                                                                                                                                                                                                                                                                                                                                                                                                                                                                                                                                                                                                                                                                                                                                                                                                                                                                                                                                                                                                                                                                                                                                                                                                                                                                                                                                                                                                                                                                                                                                                                                                                                                                         | 3,626,633  |
| 24 | injury [MeSH]                                                                                                                                                                                                                                                                                                                                                                                                                                                                                                                                                                                                                                                                                                                                                                                                                                                                                                                                                                                                                                                                                                                                                                                                                                                                                                                                                                                                                                                                                                                                                                                                                                                                                                                                                                            | 2,303,491  |
| 25 | malnutrition [MeSH]                                                                                                                                                                                                                                                                                                                                                                                                                                                                                                                                                                                                                                                                                                                                                                                                                                                                                                                                                                                                                                                                                                                                                                                                                                                                                                                                                                                                                                                                                                                                                                                                                                                                                                                                                                      | 178,039    |

|    |                                                                                                                                                                                                                      |            |
|----|----------------------------------------------------------------------------------------------------------------------------------------------------------------------------------------------------------------------|------------|
| 26 | morbidity [MeSH]                                                                                                                                                                                                     | 361,003    |
| 27 | mortality [MeSH]                                                                                                                                                                                                     | 1,081,969  |
| 28 | neoplasm [MeSH]                                                                                                                                                                                                      | 4,683,051  |
| 29 | parasite [MeSH]                                                                                                                                                                                                      | 36,154     |
| 30 | virus [MeSH]                                                                                                                                                                                                         | 907,130    |
| 31 | 14 OR 15 OR 16 OR 17 OR 18 OR 19 OR 20 OR 21 OR 21 OR 22 OR 23 OR 24 OR 25 OR 26 OR 27 OR 28 OR 29 OR 30                                                                                                             | 32,849,152 |
| 32 | Malaysia OR Johor OR Kedah OR Kelantan OR Kuala Lumpur OR Labuan OR Malacca OR Melaka OR Malaya OR Negeri Sembilan OR Pahang OR Penang OR Perak OR Perlis OR Putrajaya OR Sabah OR Sarawak OR Selangor OR Terengganu | 28,901     |
| 33 | Malaysian                                                                                                                                                                                                            | 1,611      |
| 34 | area* OR Borneo OR city OR cities OR district* OR island* OR isle* OR province* OR region* OR state* OR territor* OR village*                                                                                        | 7,357,992  |
| 35 | 33 AND 34                                                                                                                                                                                                            | 395        |
| 36 | 32 OR 35                                                                                                                                                                                                             | 29,057     |
| 37 | 13 AND 31 AND 36                                                                                                                                                                                                     | 651        |
| 38 | Animal migration OR bird migration OR cell* OR membrane* OR molecu*                                                                                                                                                  | 10,280,170 |
| 39 | 37 NOT 38                                                                                                                                                                                                            | 549        |



### I.3. Global Health

|                            |                      |
|----------------------------|----------------------|
| Database name              | Global Health        |
| Database search engine     | OvidSP               |
| Dates of database coverage | 1910 to 2019 Week 36 |
| Date search conducted      | 17 September 2019    |
| Total number of hits       | 382                  |

| # | Searches                                                                                                                                                                                                                                                                                                                                                                                                                                                                                                                                                                                                                                                                                                                                                                                                                                                                                                                                                                                                                        | Results   |
|---|---------------------------------------------------------------------------------------------------------------------------------------------------------------------------------------------------------------------------------------------------------------------------------------------------------------------------------------------------------------------------------------------------------------------------------------------------------------------------------------------------------------------------------------------------------------------------------------------------------------------------------------------------------------------------------------------------------------------------------------------------------------------------------------------------------------------------------------------------------------------------------------------------------------------------------------------------------------------------------------------------------------------------------|-----------|
| 1 | asylum* OR displaced OR emigra* OR emigre* OR foreign born OR foreign labor OR foreign labour OR foreign work* OR foreign-born OR foreign-work* OR foreigner* OR immigra* OR migra* OR people of concern OR person of concern OR persons of concern OR refugee* OR smuggl* OR traffick* OR transient* OR transmigrant*                                                                                                                                                                                                                                                                                                                                                                                                                                                                                                                                                                                                                                                                                                          | 89,712    |
| 2 | immigrants [MeSH]                                                                                                                                                                                                                                                                                                                                                                                                                                                                                                                                                                                                                                                                                                                                                                                                                                                                                                                                                                                                               | 7,830     |
| 3 | migrant labour [MeSH]                                                                                                                                                                                                                                                                                                                                                                                                                                                                                                                                                                                                                                                                                                                                                                                                                                                                                                                                                                                                           | 1,006     |
| 4 | migrants [MeSH]                                                                                                                                                                                                                                                                                                                                                                                                                                                                                                                                                                                                                                                                                                                                                                                                                                                                                                                                                                                                                 | 3,576     |
| 5 | migration [MeSH]                                                                                                                                                                                                                                                                                                                                                                                                                                                                                                                                                                                                                                                                                                                                                                                                                                                                                                                                                                                                                | 3,819     |
| 6 | refugees [MeSH]                                                                                                                                                                                                                                                                                                                                                                                                                                                                                                                                                                                                                                                                                                                                                                                                                                                                                                                                                                                                                 | 3,687     |
| 7 | 1 OR 2 OR 3 OR 4 OR 5 OR 6                                                                                                                                                                                                                                                                                                                                                                                                                                                                                                                                                                                                                                                                                                                                                                                                                                                                                                                                                                                                      | 89,712    |
| 8 | abnormalit* OR abortion* OR abscess* OR accident* OR ache* OR aids OR ailment* OR alcohol* OR allerg* OR anorexia OR AMR OR antibiotic resistan* OR antimicrobial resistan* OR anxiet* OR allerg* OR apnoea OR arthritis OR ascariasis OR assault* OR asthma OR attack* OR bacteri* OR bipolar OR bite* OR blastoma* OR bleed* OR blind OR blood OR burn* OR cancer* OR cardio* OR Chagas OR chlamydia OR cholesterol OR coma OR complication* OR condition* OR condom* OR contraception OR cyst* OR dead OR deaf OR death* OR decay OR deform* OR dehydrat* OR dementia OR dengue OR depress* OR diabetes OR diarrhoea OR disabilit* OR disease* OR disorder* OR dracunculiasis OR drug* OR dysfunction* OR eczema OR enlargement* OR epilep* OR exhaust* OR failure OR fatal* OR fatigue OR fever* OR filariasis OR flu OR gall stone* gallstone* OR gonorrhoea OR headache* OR health OR healthcare OR hearing loss OR helminth* OR hepatitis OR hernia* OR herpe* OR HIV OR hookworm* OR HPV OR hypertension OR illness* OR | 3,675,317 |

|    |                                                                                                                                                                                                                                                                                                                                                                                                                                                                                                                                                                                                                                                                                                                                                                                                                                                                                                                                                                                                                                                                                  |           |
|----|----------------------------------------------------------------------------------------------------------------------------------------------------------------------------------------------------------------------------------------------------------------------------------------------------------------------------------------------------------------------------------------------------------------------------------------------------------------------------------------------------------------------------------------------------------------------------------------------------------------------------------------------------------------------------------------------------------------------------------------------------------------------------------------------------------------------------------------------------------------------------------------------------------------------------------------------------------------------------------------------------------------------------------------------------------------------------------|-----------|
|    | indigestion* OR infect* OR inflame* OR injur* OR leishmaniasis OR leprosy OR leukaemia OR leukemia OR lice OR life expectancy OR malaria OR malformat* OR malnutrition OR measles OR medical OR melanoma* OR mental* OR migraine OR miscarriage* OR morbidit* OR mortalit* OR muscl* OR myeloma OR nausea OR neuro* OR nutrition* OR onchocerciasis OR osteoarthritis OR osteoporosis OR pain* OR parasite* OR patient care OR physical activ* OR pneumonia OR poison* OR psoriasis OR psychiatric OR psychos* OR rabies OR rape* OR reproductiv* OR rheuma* OR ringworm* OR sarcoma* OR scabies OR schistosomiasis OR schizophren* OR seizure* OR sepsis* OR sexual* OR shock* OR sick* OR smoking OR sore* OR STD* OR stillbirth* OR stress* OR stroke* OR suicid* OR sunburn* OR syndrome* OR syphilis OR TB OR thrombosis OR tobacco OR STI* OR toothache* OR trachoma OR trauma* OR trichuriasis OR trichomoniasis OR trypanosomiasis OR tuberculosis OR tumor* OR tumour* OR ulcer* OR violence OR virus* OR vomit* OR wart* OR well-being OR wellbeing OR worm* OR wound* |           |
| 9  | accidents [MeSH]                                                                                                                                                                                                                                                                                                                                                                                                                                                                                                                                                                                                                                                                                                                                                                                                                                                                                                                                                                                                                                                                 | 14,359    |
| 10 | diseases [MeSH]                                                                                                                                                                                                                                                                                                                                                                                                                                                                                                                                                                                                                                                                                                                                                                                                                                                                                                                                                                                                                                                                  | 2,302,791 |
| 11 | health [MeSH]                                                                                                                                                                                                                                                                                                                                                                                                                                                                                                                                                                                                                                                                                                                                                                                                                                                                                                                                                                                                                                                                    | 283,009   |
| 12 | health behaviour [MeSH]                                                                                                                                                                                                                                                                                                                                                                                                                                                                                                                                                                                                                                                                                                                                                                                                                                                                                                                                                                                                                                                          | 11,560    |
| 13 | health care [MeSH]                                                                                                                                                                                                                                                                                                                                                                                                                                                                                                                                                                                                                                                                                                                                                                                                                                                                                                                                                                                                                                                               | 91,876    |
| 14 | health policy [MeSH]                                                                                                                                                                                                                                                                                                                                                                                                                                                                                                                                                                                                                                                                                                                                                                                                                                                                                                                                                                                                                                                             | 20,150    |
| 15 | health services [MeSH]                                                                                                                                                                                                                                                                                                                                                                                                                                                                                                                                                                                                                                                                                                                                                                                                                                                                                                                                                                                                                                                           | 88,605    |
| 16 | infection [MeSH]                                                                                                                                                                                                                                                                                                                                                                                                                                                                                                                                                                                                                                                                                                                                                                                                                                                                                                                                                                                                                                                                 | 100,189   |
| 17 | injuries [MeSH]                                                                                                                                                                                                                                                                                                                                                                                                                                                                                                                                                                                                                                                                                                                                                                                                                                                                                                                                                                                                                                                                  | 3,171     |
| 18 | malnutrition [MeSH]                                                                                                                                                                                                                                                                                                                                                                                                                                                                                                                                                                                                                                                                                                                                                                                                                                                                                                                                                                                                                                                              | 28,215    |
| 19 | morbidity [MeSH]                                                                                                                                                                                                                                                                                                                                                                                                                                                                                                                                                                                                                                                                                                                                                                                                                                                                                                                                                                                                                                                                 | 28,845    |
| 20 | mortality [MeSH]                                                                                                                                                                                                                                                                                                                                                                                                                                                                                                                                                                                                                                                                                                                                                                                                                                                                                                                                                                                                                                                                 | 135,836   |
| 21 | neoplasm [MeSH]                                                                                                                                                                                                                                                                                                                                                                                                                                                                                                                                                                                                                                                                                                                                                                                                                                                                                                                                                                                                                                                                  | 225,495   |
| 22 | parasites [MeSH]                                                                                                                                                                                                                                                                                                                                                                                                                                                                                                                                                                                                                                                                                                                                                                                                                                                                                                                                                                                                                                                                 | 488,622   |
| 23 | viruses [MeSH]                                                                                                                                                                                                                                                                                                                                                                                                                                                                                                                                                                                                                                                                                                                                                                                                                                                                                                                                                                                                                                                                   | 496,168   |
| 24 | 8 OR 9 OR 10 OR 11 OR 12 OR 13 OR 14 OR 15 OR 16 OR 17 OR 18 OR 19 OR 20 OR 21 OR 22 OR 23                                                                                                                                                                                                                                                                                                                                                                                                                                                                                                                                                                                                                                                                                                                                                                                                                                                                                                                                                                                       | 3,688,190 |

|    |                                                                                                                                                                                                                      |           |
|----|----------------------------------------------------------------------------------------------------------------------------------------------------------------------------------------------------------------------|-----------|
|    |                                                                                                                                                                                                                      |           |
| 25 | Malaysia OR Johor OR Kedah OR Kelantan OR Kuala Lumpur OR Labuan OR Malacca OR Melaka OR Malaya OR Negeri Sembilan OR Pahang OR Penang OR Perak OR Perlis OR Putrajaya OR Sabah OR Sarawak OR Selangor OR Terengganu | 17,417    |
| 26 | Malaysian                                                                                                                                                                                                            | 3,366     |
| 27 | area* OR Borneo OR city OR cities OR district* OR island* OR isle* OR province* OR region* OR state* OR territor* OR village*                                                                                        | 1,392,874 |
| 28 | 26 AND 27                                                                                                                                                                                                            | 1,138     |
| 29 | 25 OR 28                                                                                                                                                                                                             | 17,513    |
|    |                                                                                                                                                                                                                      |           |
| 30 | 7 AND 24 AND 29                                                                                                                                                                                                      | 429       |
|    |                                                                                                                                                                                                                      |           |
| 31 | Animal migration OR bird migration OR cell* OR membrane* OR molercul*                                                                                                                                                | 833,650   |
| 32 | 30 NOT 31                                                                                                                                                                                                            | 382       |

#### I.4. Medline

|                            |                               |
|----------------------------|-------------------------------|
| Database name              | Medline                       |
| Database search engine     | OvidSP                        |
| Dates of database coverage | 1946 to September Week 1 2019 |
| Date search conducted      | 17 September 2019             |
| Total number of hits       | 364                           |

| # | Searches                                                                                                                                                                                                                                                                                                                                                                                                                                                                                                                                                                                                                                                                                                                                                                                                                                                                                                                                                                                                                        | Results    |
|---|---------------------------------------------------------------------------------------------------------------------------------------------------------------------------------------------------------------------------------------------------------------------------------------------------------------------------------------------------------------------------------------------------------------------------------------------------------------------------------------------------------------------------------------------------------------------------------------------------------------------------------------------------------------------------------------------------------------------------------------------------------------------------------------------------------------------------------------------------------------------------------------------------------------------------------------------------------------------------------------------------------------------------------|------------|
| 1 | asylum* OR displaced OR emigra* OR emigre* OR foreign born OR foreign labor OR foreign labour OR foreign work* OR foreign-born OR foreign-work* OR foreigner* OR immigra* OR migra* OR people of concern OR person of concern OR persons of concern OR refugee* OR smuggl* OR traffick* OR transient* OR transmigrant*                                                                                                                                                                                                                                                                                                                                                                                                                                                                                                                                                                                                                                                                                                          | 720,051    |
| 2 | “Emigrants and Immigrants” [MeSH]                                                                                                                                                                                                                                                                                                                                                                                                                                                                                                                                                                                                                                                                                                                                                                                                                                                                                                                                                                                               | 11,337     |
| 3 | “Emigration and Immigration” [MeSH]                                                                                                                                                                                                                                                                                                                                                                                                                                                                                                                                                                                                                                                                                                                                                                                                                                                                                                                                                                                             | 24,805     |
| 4 | Human Trafficking [MeSH]                                                                                                                                                                                                                                                                                                                                                                                                                                                                                                                                                                                                                                                                                                                                                                                                                                                                                                                                                                                                        | 347        |
| 5 | Refugees [MeSH]                                                                                                                                                                                                                                                                                                                                                                                                                                                                                                                                                                                                                                                                                                                                                                                                                                                                                                                                                                                                                 | 9,508      |
| 6 | “Transients and Migrants”                                                                                                                                                                                                                                                                                                                                                                                                                                                                                                                                                                                                                                                                                                                                                                                                                                                                                                                                                                                                       | 10,955     |
| 7 | 1 OR 2 OR 3 OR 4 OR 5 OR 6                                                                                                                                                                                                                                                                                                                                                                                                                                                                                                                                                                                                                                                                                                                                                                                                                                                                                                                                                                                                      | 720,051    |
| 8 | abnormalit* OR abortion* OR abscess* OR accident* OR ache* OR aids OR ailment* OR alcohol* OR allerg* OR anorexia OR AMR OR antibiotic resistan* OR antimicrobial resistan* OR anxiet* OR allerg* OR apnoea OR arthritis OR ascariasis OR assault* OR asthma OR attack* OR bacteri* OR bipolar OR bite* OR blastoma* OR bleed* OR blind OR blood OR burn* OR cancer* OR cardio* OR Chagas OR chlamydia OR cholesterol OR coma OR complication* OR condition* OR condom* OR contraception OR cyst* OR dead OR deaf OR death* OR decay OR deform* OR dehydrat* OR dementia OR dengue OR depress* OR diabetes OR diarrhoea OR disabilit* OR disease* OR disorder* OR dracunculiasis OR drug* OR dysfunction* OR eczema OR enlargement* OR epilep* OR exhaust* OR failure OR fatal* OR fatigue OR fever* OR filariasis OR flu OR gall stone* gallstone* OR gonorrhoea OR headache* OR health OR healthcare OR hearing loss OR helminth* OR hepatitis OR hernia* OR herpe* OR HIV OR hookworm* OR HPV OR hypertension OR illness* OR | 21,089,958 |

|    |                                                                                                                                                                                                                                                                                                                                                                                                                                                                                                                                                                                                                                                                                                                                                                                                                                                                                                                                                                                                                                                                                  |           |
|----|----------------------------------------------------------------------------------------------------------------------------------------------------------------------------------------------------------------------------------------------------------------------------------------------------------------------------------------------------------------------------------------------------------------------------------------------------------------------------------------------------------------------------------------------------------------------------------------------------------------------------------------------------------------------------------------------------------------------------------------------------------------------------------------------------------------------------------------------------------------------------------------------------------------------------------------------------------------------------------------------------------------------------------------------------------------------------------|-----------|
|    | indigestion* OR infect* OR inflame* OR injur* OR leishmaniasis OR leprosy OR leukaemia OR leukemia OR lice OR life expectancy OR malaria OR malformat* OR malnutrition OR measles OR medical OR melanoma* OR mental* OR migraine OR miscarriage* OR morbidit* OR mortalit* OR muscl* OR myeloma OR nausea OR neuro* OR nutrition* OR onchocerciasis OR osteoarthritis OR osteoporosis OR pain* OR parasite* OR patient care OR physical activ* OR pneumonia OR poison* OR psoriasis OR psychiatric OR psychos* OR rabies OR rape* OR reproductiv* OR rheuma* OR ringworm* OR sarcoma* OR scabies OR schistosomiasis OR schizophren* OR seizure* OR sepsis* OR sexual* OR shock* OR sick* OR smoking OR sore* OR STD* OR stillbirth* OR stress* OR stroke* OR suicid* OR sunburn* OR syndrome* OR syphilis OR TB OR thrombosis OR tobacco OR STI* OR toothache* OR trachoma OR trauma* OR trichuriasis OR trichomoniasis OR trypanosomiasis OR tuberculosis OR tumor* OR tumour* OR ulcer* OR violence OR virus* OR vomit* OR wart* OR well-being OR wellbeing OR worm* OR wound* |           |
| 9  | Accidents [MeSH]                                                                                                                                                                                                                                                                                                                                                                                                                                                                                                                                                                                                                                                                                                                                                                                                                                                                                                                                                                                                                                                                 | 182,330   |
| 10 | “Delivery of Health Care” [MeSH]                                                                                                                                                                                                                                                                                                                                                                                                                                                                                                                                                                                                                                                                                                                                                                                                                                                                                                                                                                                                                                                 | 1,028,923 |
| 11 | Disease [MeSH]                                                                                                                                                                                                                                                                                                                                                                                                                                                                                                                                                                                                                                                                                                                                                                                                                                                                                                                                                                                                                                                                   | 181,324   |
| 12 | Health [MeSH]                                                                                                                                                                                                                                                                                                                                                                                                                                                                                                                                                                                                                                                                                                                                                                                                                                                                                                                                                                                                                                                                    | 344,725   |
| 13 | Health Behavior [MeSH]                                                                                                                                                                                                                                                                                                                                                                                                                                                                                                                                                                                                                                                                                                                                                                                                                                                                                                                                                                                                                                                           | 301,243   |
| 14 | Health Facilities [MeSH]                                                                                                                                                                                                                                                                                                                                                                                                                                                                                                                                                                                                                                                                                                                                                                                                                                                                                                                                                                                                                                                         | 756,386   |
| 15 | Health Policy [MeSH]                                                                                                                                                                                                                                                                                                                                                                                                                                                                                                                                                                                                                                                                                                                                                                                                                                                                                                                                                                                                                                                             | 102,614   |
| 16 | Health Services [MeSH]                                                                                                                                                                                                                                                                                                                                                                                                                                                                                                                                                                                                                                                                                                                                                                                                                                                                                                                                                                                                                                                           | 2,044,089 |
| 17 | Infection [MeSH]                                                                                                                                                                                                                                                                                                                                                                                                                                                                                                                                                                                                                                                                                                                                                                                                                                                                                                                                                                                                                                                                 | 765,299   |
| 18 | Malnutrition [MeSH]                                                                                                                                                                                                                                                                                                                                                                                                                                                                                                                                                                                                                                                                                                                                                                                                                                                                                                                                                                                                                                                              | 118,335   |
| 19 | Morbidity [MeSH]                                                                                                                                                                                                                                                                                                                                                                                                                                                                                                                                                                                                                                                                                                                                                                                                                                                                                                                                                                                                                                                                 | 524,764   |
| 20 | Mortality [MeSH]                                                                                                                                                                                                                                                                                                                                                                                                                                                                                                                                                                                                                                                                                                                                                                                                                                                                                                                                                                                                                                                                 | 364,390   |
| 21 | Neoplasms [MeSH]                                                                                                                                                                                                                                                                                                                                                                                                                                                                                                                                                                                                                                                                                                                                                                                                                                                                                                                                                                                                                                                                 | 3,212,183 |
| 22 | Parasites [ MeSH]                                                                                                                                                                                                                                                                                                                                                                                                                                                                                                                                                                                                                                                                                                                                                                                                                                                                                                                                                                                                                                                                | 6,776     |
| 23 | Viruses [MeSH]                                                                                                                                                                                                                                                                                                                                                                                                                                                                                                                                                                                                                                                                                                                                                                                                                                                                                                                                                                                                                                                                   | 754,871   |
| 24 | “Wounds and Injuries” [MeSH]                                                                                                                                                                                                                                                                                                                                                                                                                                                                                                                                                                                                                                                                                                                                                                                                                                                                                                                                                                                                                                                     | 873,897   |

|    |                                                                                                                                                                                                                            |            |
|----|----------------------------------------------------------------------------------------------------------------------------------------------------------------------------------------------------------------------------|------------|
| 25 | 8 OR 9 OR 10 OR 11 OR 12 OR 13 OR 14 OR 15 OR 16 OR 17 OR 18 OR 19 OR 20<br>OR 21 OR 22 OR 23 OR 24                                                                                                                        | 21,770,503 |
|    |                                                                                                                                                                                                                            |            |
| 26 | Malaysia OR Johor OR Kedah OR Kelantan OR Kuala Lumpur OR Labuan OR<br>Malacca OR Melaka OR Malaya OR Negeri Sembilan OR Pahang OR Penang OR Perak<br>OR Perlis OR Putrajaya OR Sabah OR Sarawak OR Selangor OR Terengganu | 17,824     |
| 27 | Malaysian                                                                                                                                                                                                                  | 4,673      |
| 28 | area* OR Borneo OR city OR cities OR district* OR island* OR isle* OR province*<br>OR region* OR state* OR territor* OR village*                                                                                           | 4,572,673  |
| 29 | 27 AND 28                                                                                                                                                                                                                  | 1,297      |
| 30 | 26 OR 29                                                                                                                                                                                                                   | 18,038     |
|    |                                                                                                                                                                                                                            |            |
| 31 | 7 AND 25 AND 30                                                                                                                                                                                                            | 404        |
|    |                                                                                                                                                                                                                            |            |
| 32 | Animal migration OR bird migration OR cell* OR membrane* OR molecu*                                                                                                                                                        | 6,952,122  |
| 33 | 31 NOT 32                                                                                                                                                                                                                  | 364        |

### I.5. PsychInfo

|                            |                               |
|----------------------------|-------------------------------|
| Database name              | PsychInfo                     |
| Database search engine     | OvidSP                        |
| Dates of database coverage | 1806 to September Week 2 2019 |
| Date search conducted      | 17 September 2019             |
| Total number of hits       | 91                            |

| # | Searches                                                                                                                                                                                                                                                                                                                                                                                                                                                                                                                                                                                                                                                                                                                                                                                                                                                                       | Results   |
|---|--------------------------------------------------------------------------------------------------------------------------------------------------------------------------------------------------------------------------------------------------------------------------------------------------------------------------------------------------------------------------------------------------------------------------------------------------------------------------------------------------------------------------------------------------------------------------------------------------------------------------------------------------------------------------------------------------------------------------------------------------------------------------------------------------------------------------------------------------------------------------------|-----------|
| 1 | asylum* OR displaced OR emigra* OR emigre* OR foreign born OR foreign labor OR foreign labour OR foreign work* OR foreign-born OR foreign-work* OR foreigner* OR immigra* OR migra* OR people of concern OR person of concern OR persons of concern OR refugee* OR smuggl* OR traffick* OR transient* OR transmigrant*                                                                                                                                                                                                                                                                                                                                                                                                                                                                                                                                                         | 112,729   |
| 2 | Asylum seeking [MeSH]                                                                                                                                                                                                                                                                                                                                                                                                                                                                                                                                                                                                                                                                                                                                                                                                                                                          | 487       |
| 3 | Foreign workers [MeSH]                                                                                                                                                                                                                                                                                                                                                                                                                                                                                                                                                                                                                                                                                                                                                                                                                                                         | 530       |
| 4 | Human migration [MeSH]                                                                                                                                                                                                                                                                                                                                                                                                                                                                                                                                                                                                                                                                                                                                                                                                                                                         | 12,788    |
| 5 | Human trafficking [MeSH]                                                                                                                                                                                                                                                                                                                                                                                                                                                                                                                                                                                                                                                                                                                                                                                                                                                       | 844       |
| 6 | Immigration [MeSH]                                                                                                                                                                                                                                                                                                                                                                                                                                                                                                                                                                                                                                                                                                                                                                                                                                                             | 21,250    |
| 7 | Refugees [MeSH]                                                                                                                                                                                                                                                                                                                                                                                                                                                                                                                                                                                                                                                                                                                                                                                                                                                                | 5,580     |
| 8 | 1 OR 2 OR 3 OR 4 OR 5 OR 6 OR 7                                                                                                                                                                                                                                                                                                                                                                                                                                                                                                                                                                                                                                                                                                                                                                                                                                                | 113,572   |
| 9 | abnormalit* OR abortion* OR abscess* OR accident* OR ache* OR aids OR ailment* OR alcohol* OR allerg* OR anorexia OR AMR OR antibiotic resistan* OR antimicrobial resistan* OR anxiet* OR allerg* OR apnoea OR arthritis OR ascariasis OR assault* OR asthma OR attack* OR bacteri* OR bipolar OR bite* OR blastoma* OR bleed* OR blind OR blood OR burn* OR cancer* OR cardio* OR Chagas OR chlamydia OR cholesterol OR coma OR complication* OR condition* OR condom* OR contraception OR cyst* OR dead OR deaf OR death* OR decay OR deform* OR dehydrat* OR dementia OR dengue OR depress* OR diabetes OR diarrhoea OR disabilit* OR disease* OR disorder* OR dracunculiasis OR drug* OR dysfunction* OR eczema OR enlargement* OR epilep* OR exhaust* OR failure OR fatal* OR fatigue OR fever* OR filariasis OR flu OR gall stone* gallstone* OR gonorrhoea OR headache* | 3,197,191 |

|    |                                                                                                                                                                                                                                                                                                                                                                                                                                                                                                                                                                                                                                                                                                                                                                                                                                                                                                                                                                                                                                                                                                                                                                                                                                  |         |
|----|----------------------------------------------------------------------------------------------------------------------------------------------------------------------------------------------------------------------------------------------------------------------------------------------------------------------------------------------------------------------------------------------------------------------------------------------------------------------------------------------------------------------------------------------------------------------------------------------------------------------------------------------------------------------------------------------------------------------------------------------------------------------------------------------------------------------------------------------------------------------------------------------------------------------------------------------------------------------------------------------------------------------------------------------------------------------------------------------------------------------------------------------------------------------------------------------------------------------------------|---------|
|    | OR health OR healthcare OR hearing loss OR helminth* OR hepatitis OR hernia* OR herpe* OR HIV OR hookworm* OR HPV OR hypertension OR illness* OR indigestion* OR infect* OR inflame* OR injur* OR leishmaniasis OR leprosy OR leukaemia OR leukemia OR lice OR life expectancy OR malaria OR malformat* OR malnutrition OR measles OR medical OR melanoma* OR mental* OR migraine OR miscarriage* OR morbidit* OR mortalit* OR muscl* OR myeloma OR nausea OR neuro* OR nutrition* OR onchocerciasis OR osteoarthritis OR osteoporosis OR pain* OR parasite* OR patient care OR physical activ* OR pneumonia OR poison* OR psoriasis OR psychiatric OR psychos* OR rabies OR rape* OR reproductiv* OR rheuma* OR ringworm* OR sarcoma* OR scabies OR schistosomiasis OR schizopren* OR seizure* OR sepsis* OR sexual* OR shock* OR sick* OR smoking OR sore* OR STD* OR stillbirth* OR stress* OR stroke* OR suicid* OR sunburn* OR syndrome* OR syphilis OR TB OR thrombosis OR tobacco OR STI* OR toothache* OR trachoma OR trauma* OR trichuriasis OR trichomoniasis OR trypanosomiasis OR tuberculosis OR tumor* OR tumour* OR ulcer* OR violence OR virus* OR vomit* OR wart* OR well-being OR wellbeing OR worm* OR wound* |         |
| 10 | Accidents [MeSH]                                                                                                                                                                                                                                                                                                                                                                                                                                                                                                                                                                                                                                                                                                                                                                                                                                                                                                                                                                                                                                                                                                                                                                                                                 | 13,047  |
| 11 | Chronic illness [MeSH]                                                                                                                                                                                                                                                                                                                                                                                                                                                                                                                                                                                                                                                                                                                                                                                                                                                                                                                                                                                                                                                                                                                                                                                                           | 27,898  |
| 12 | “Death and Dying” [MeSH]                                                                                                                                                                                                                                                                                                                                                                                                                                                                                                                                                                                                                                                                                                                                                                                                                                                                                                                                                                                                                                                                                                                                                                                                         | 37,732  |
| 13 | Health [MeSH]                                                                                                                                                                                                                                                                                                                                                                                                                                                                                                                                                                                                                                                                                                                                                                                                                                                                                                                                                                                                                                                                                                                                                                                                                    | 239,359 |
| 14 | Health Behavior [MeSH]                                                                                                                                                                                                                                                                                                                                                                                                                                                                                                                                                                                                                                                                                                                                                                                                                                                                                                                                                                                                                                                                                                                                                                                                           | 29,441  |
| 15 | Health Care Delivery [MeSH]                                                                                                                                                                                                                                                                                                                                                                                                                                                                                                                                                                                                                                                                                                                                                                                                                                                                                                                                                                                                                                                                                                                                                                                                      | 93,926  |
| 16 | Health Care Policy [MeSH]                                                                                                                                                                                                                                                                                                                                                                                                                                                                                                                                                                                                                                                                                                                                                                                                                                                                                                                                                                                                                                                                                                                                                                                                        | 11,882  |
| 17 | Health Care Services [MeSH]                                                                                                                                                                                                                                                                                                                                                                                                                                                                                                                                                                                                                                                                                                                                                                                                                                                                                                                                                                                                                                                                                                                                                                                                      | 199,129 |
| 18 | Health Care Utilization [MeSH]                                                                                                                                                                                                                                                                                                                                                                                                                                                                                                                                                                                                                                                                                                                                                                                                                                                                                                                                                                                                                                                                                                                                                                                                   | 15,311  |
| 19 | Infectious disorders [MeSH]                                                                                                                                                                                                                                                                                                                                                                                                                                                                                                                                                                                                                                                                                                                                                                                                                                                                                                                                                                                                                                                                                                                                                                                                      | 60,085  |
| 20 | Injuries [MeSH]                                                                                                                                                                                                                                                                                                                                                                                                                                                                                                                                                                                                                                                                                                                                                                                                                                                                                                                                                                                                                                                                                                                                                                                                                  | 25,738  |
| 21 | Morbidity [MeSH]                                                                                                                                                                                                                                                                                                                                                                                                                                                                                                                                                                                                                                                                                                                                                                                                                                                                                                                                                                                                                                                                                                                                                                                                                 | 7,010   |
| 22 | Neoplasms [MeSH]                                                                                                                                                                                                                                                                                                                                                                                                                                                                                                                                                                                                                                                                                                                                                                                                                                                                                                                                                                                                                                                                                                                                                                                                                 | 49,460  |
| 23 | Nutritional deficiencies [MeSH]                                                                                                                                                                                                                                                                                                                                                                                                                                                                                                                                                                                                                                                                                                                                                                                                                                                                                                                                                                                                                                                                                                                                                                                                  | 3,952   |
| 24 | Parasitic disorders [MeSH]                                                                                                                                                                                                                                                                                                                                                                                                                                                                                                                                                                                                                                                                                                                                                                                                                                                                                                                                                                                                                                                                                                                                                                                                       | 1,068   |
| 25 | Viral disorders [MeSH]                                                                                                                                                                                                                                                                                                                                                                                                                                                                                                                                                                                                                                                                                                                                                                                                                                                                                                                                                                                                                                                                                                                                                                                                           | 50,123  |



|    |                                                                                                                                                                                                                            |           |
|----|----------------------------------------------------------------------------------------------------------------------------------------------------------------------------------------------------------------------------|-----------|
| 26 | 9 OR 10 OR 11 OR 12 OR 13 OR 14 OR 15 OR 16 OR 17 OR 18 OR 19 OR 20 OR 21<br>OR 22 OR 23 OR 24 OR 25                                                                                                                       | 3,211,923 |
|    |                                                                                                                                                                                                                            |           |
| 27 | Malaysia OR Johor OR Kedah OR Kelantan OR Kuala Lumpur OR Labuan OR<br>Malacca OR Melaka OR Malaya OR Negeri Sembilan OR Pahang OR Penang OR Perak<br>OR Perlis OR Putrajaya OR Sabah OR Sarawak OR Selangor OR Terengganu | 3,636     |
| 28 | Malaysian                                                                                                                                                                                                                  | 1,676     |
| 29 | area* OR Borneo OR city OR cities OR district* OR island* OR isle* OR province*<br>OR region* OR state* OR territor* OR village*                                                                                           | 1,025,257 |
| 30 | 28 AND 29                                                                                                                                                                                                                  | 391       |
| 31 | 27 OR 30                                                                                                                                                                                                                   | 3,727     |
|    |                                                                                                                                                                                                                            |           |
| 32 | 8 AND 26 AND 31                                                                                                                                                                                                            | 91        |
|    |                                                                                                                                                                                                                            |           |
| 33 | Animal migration OR bird migration OR cell* OR membrane* OR molecu*                                                                                                                                                        | 184,060   |
| 34 | 32 NOT 33                                                                                                                                                                                                                  | 91        |

## I.6. Social Policy and Practice

|                            |                            |
|----------------------------|----------------------------|
| Database name              | Social Policy and Practice |
| Database search engine     | OvidSP                     |
| Dates of database coverage | N/A                        |
| Date search conducted      | 17 September 2019          |
| Total number of hits       | 5                          |

| # | Searches                                                                                                                                                                                                                                                                                                                                                                                                                                                                                                                                                                                                                                                                                                                                                                                                                                                                                                                                                                                                                                                                                                                                                                                                                                                                                                                                                                                                                                                                                                                                                                                                                                                                                                                           | Results |
|---|------------------------------------------------------------------------------------------------------------------------------------------------------------------------------------------------------------------------------------------------------------------------------------------------------------------------------------------------------------------------------------------------------------------------------------------------------------------------------------------------------------------------------------------------------------------------------------------------------------------------------------------------------------------------------------------------------------------------------------------------------------------------------------------------------------------------------------------------------------------------------------------------------------------------------------------------------------------------------------------------------------------------------------------------------------------------------------------------------------------------------------------------------------------------------------------------------------------------------------------------------------------------------------------------------------------------------------------------------------------------------------------------------------------------------------------------------------------------------------------------------------------------------------------------------------------------------------------------------------------------------------------------------------------------------------------------------------------------------------|---------|
| 1 | asylum* OR displaced OR emigra* OR emigre* OR foreign born OR foreign labor OR foreign labour OR foreign work* OR foreign-born OR foreign-work* OR foreigner* OR immigra* OR migra* OR people of concern OR person of concern OR persons of concern OR refugee* OR smuggl* OR traffick* OR transient* OR transmigrant*                                                                                                                                                                                                                                                                                                                                                                                                                                                                                                                                                                                                                                                                                                                                                                                                                                                                                                                                                                                                                                                                                                                                                                                                                                                                                                                                                                                                             | 10,050  |
| 2 | abnormalit* OR abortion* OR abscess* OR accident* OR ache* OR aids OR ailment* OR alcohol* OR allerg* OR anorexia OR AMR OR antibiotic resistan* OR antimicrobial resistan* OR anxiet* OR allerg* OR apnoea OR arthritis OR ascariasis OR assault* OR asthma OR attack* OR bacteri* OR bipolar OR bite* OR blastoma* OR bleed* OR blind OR blood OR burn* OR cancer* OR cardio* OR Chagas OR chlamydia OR cholesterol OR coma OR complication* OR condition* OR condom* OR contraception OR cyst* OR dead OR deaf OR death* OR decay OR deform* OR dehydrat* OR dementia OR dengue OR depress* OR diabetes OR diarrhoea OR disabilit* OR disease* OR disorder* OR dracunculiasis OR drug* OR dysfunction* OR eczema OR enlargement* OR epilep* OR exhaust* OR failure OR fatal* OR fatigue OR fever* OR filariasis OR flu OR gall stone* gallstone* OR gonorrhea OR headache* OR health OR healthcare OR hearing loss OR helminth* OR hepatitis OR hernia* OR herpe* OR HIV OR hookworm* OR HPV OR hypertension OR illness* OR indigestion* OR infect* OR inflame* OR injur* OR leishmaniasis OR leprosy OR leukaemia OR leukemia OR lice OR life expectancy OR malaria OR malformat* OR malnutrition OR measles OR medical OR melanoma* OR mental* OR migraine OR miscarriage* OR morbidit* OR mortalit* OR muscl* OR myeloma OR nausea OR neuro* OR nutrition* OR onchocerciasis OR osteoarthritis OR osteoporosis OR pain* OR parasite* OR patient care OR physical activ* OR pneumonia OR poison* OR psoriasis OR psychiatric OR psychos* OR rabies OR rape* OR reproductiv* OR rheuma* OR ringworm* OR sarcoma* OR scabies OR schistosomiasis OR schizophren* OR seizure* OR sepsis* OR sexual* OR shock* OR sick* OR smoking | 197,274 |

|    |                                                                                                                                                                                                                                                                                                                                                                              |        |
|----|------------------------------------------------------------------------------------------------------------------------------------------------------------------------------------------------------------------------------------------------------------------------------------------------------------------------------------------------------------------------------|--------|
|    | OR sore* OR STD* OR stillbirth* OR stress* OR stroke* OR suicid* OR sunburn* OR syndrome* OR syphilis OR TB OR thrombosis OR tobacco OR STI* OR toothache* OR trachoma OR trauma* OR trichuriasis OR trichomoniasis OR trypanosomiasis OR tuberculosis OR tumor* OR tumour* OR ulcer* OR violence OR virus* OR vomit* OR wart* OR well-being OR wellbeing OR worm* OR wound* |        |
|    |                                                                                                                                                                                                                                                                                                                                                                              |        |
| 3  | Malaysia OR Johor OR Kedah OR Kelantan OR Kuala Lumpur OR Labuan OR Malacca OR Melaka OR Malaya OR Negeri Sembilan OR Pahang OR Penang OR Perak OR Perlis OR Putrajaya OR Sabah OR Sarawak OR Selangor OR Terengganu                                                                                                                                                         | 113    |
| 4  | Malaysian                                                                                                                                                                                                                                                                                                                                                                    | 21     |
| 5  | area* OR Borneo OR city OR cities OR district* OR island* OR isle* OR province* OR region* OR state* OR territor* OR village*                                                                                                                                                                                                                                                | 92,897 |
| 6  | 4 AND 5                                                                                                                                                                                                                                                                                                                                                                      | 5      |
| 7  | 3 OR 6                                                                                                                                                                                                                                                                                                                                                                       | 114    |
|    |                                                                                                                                                                                                                                                                                                                                                                              |        |
| 8  | 1 AND 2 AND 7                                                                                                                                                                                                                                                                                                                                                                | 5      |
|    |                                                                                                                                                                                                                                                                                                                                                                              |        |
| 9  | Animal migration OR bird migration OR cell* OR membrane* OR molecu*                                                                                                                                                                                                                                                                                                          | 447    |
| 10 | 8 NOT 9                                                                                                                                                                                                                                                                                                                                                                      | 5      |

**I.7. Summary of the identified records**

| <b>Database</b>          | <b>Hits</b>  |
|--------------------------|--------------|
| Econlit                  | 348          |
| Embase                   | 549          |
| Global Health            | 382          |
| Medline                  | 364          |
| PsycInfo                 | 91           |
| Social Policy & Practice | 5            |
| <b>Total</b>             | <b>1,739</b> |

## Supplementary file 3. Individual scores of the quality assessment

| No. | Reference                      | Study design               | Level of evidence | Answer to the quality appraisal question |   |     |   |   |     |     |   |     |    |    |    |    | Total score | Score in percentage | Quality of the study |
|-----|--------------------------------|----------------------------|-------------------|------------------------------------------|---|-----|---|---|-----|-----|---|-----|----|----|----|----|-------------|---------------------|----------------------|
|     |                                |                            |                   | 1                                        | 2 | 3   | 4 | 5 | 6   | 7   | 8 | 9   | 10 | 11 | 12 | 13 |             |                     |                      |
| 1   | Scheutz et al <sup>33</sup>    | Prevalence                 | Des-3             | V                                        | X | X   | V | V | V   | V   | X | X   | -  | -  | -  | -  | 5/9         | 55.6                | Moderate             |
| 2   | Levy <sup>34</sup>             | Prevalence                 | Des-2             | X                                        | X | V   | X | V | V   | X   | X | V   | -  | -  | -  | -  | 4/9         | 44.4                | Low                  |
| 3   | Kassim et al <sup>35</sup>     | Case series                | Des-3             | X                                        | V | X   | V | X | V   | V   | X | V   | V  | -  | -  | -  | 6/10        | 60.0                | Moderate             |
| 4   | Zulkifli et al <sup>36</sup>   | Analytical cross-sectional | Obs-4             | X                                        | X | N/A | V | V | X   | X   | - | -   | -  | -  | -  | -  | 2/6         | 33.3                | Low                  |
| 5   | Rajeswari et al <sup>37</sup>  | Prevalence                 | Des-3             | X                                        | X | X   | V | X | V   | X   | X | X   | -  | -  | -  | -  | 2/9         | 22.2                | Low                  |
| 6   | Jeyakumar <sup>38</sup>        | Case series                | Des-3             | X                                        | X | X   | V | X | X   | X   | V | V   | V  | -  | -  | -  | 4/10        | 40.0                | Low                  |
| 7   | Jamaiah et al <sup>39</sup>    | Case series                | Des-3             | X                                        | X | X   | V | V | X   | X   | X | V   | V  | -  | -  | -  | 4/10        | 40.0                | Low                  |
| 8   | Krahl & Hashim <sup>40</sup>   | Prevalence                 | Des-3             | V                                        | V | V   | X | V | V   | V   | V | X   | -  | -  | -  | -  | 7/9         | 77.8                | High                 |
| 9   | Zabedah et al <sup>41</sup>    | Prevalence                 | Des-2             | X                                        | X | X   | X | V | V   | X   | X | X   | -  | -  | -  | -  | 2/9         | 22.2                | Low                  |
| 10  | Dony et al <sup>42</sup>       | Prevalence                 | Des-3             | V                                        | V | V   | X | V | X   | X   | V | N/A | -  | -  | -  | -  | 5/8         | 62.5                | Moderate             |
| 11  | Chandran et al <sup>43</sup>   | Case report                | Des-4             | V                                        | X | V   | V | V | N/A | N/A | V | -   | -  | -  | -  | -  | 5/6         | 83.3                | High                 |
| 12  | Nissapatom et al <sup>44</sup> | Prevalence                 | Des-3             | X                                        | X | V   | X | V | V   | X   | V | N/A | -  | -  | -  | -  | 4/8         | 50.0                | Low                  |
| 13  | Sobri et al <sup>45</sup>      | Case series                | Des-3             | X                                        | V | V   | V | V | X   | X   | X | V   | X  | -  | -  | -  | 5/10        | 50.0                | Low                  |
| 14  | Leong <sup>46</sup>            | Prevalence                 | Des-3             | V                                        | X | X   | X | X | V   | V   | V | X   | -  | -  | -  | -  | 4/9         | 44.4                | Low                  |
| 15  | Sasidharan et al <sup>47</sup> | Prevalence                 | Des-2             | V                                        | V | V   | X | V | V   | V   | V | X   | -  | -  | -  | -  | 7/9         | 77.8                | High                 |

|    |                                       |                            |        |   |   |     |   |     |     |     |     |   |   |   |   |   |      |      |          |
|----|---------------------------------------|----------------------------|--------|---|---|-----|---|-----|-----|-----|-----|---|---|---|---|---|------|------|----------|
| 16 | Masitah et al <sup>48</sup>           | Case series                | Des-3  | V | X | X   | X | X   | X   | V   | X   | X | X | - | - | - | 2/9  | 22.2 | Low      |
| 17 | Shailendra & Prepageran <sup>49</sup> | Case report                | Des-4  | V | X | V   | V | V   | V   | X   | V   | - | - | - | - | - | 6/8  | 75.0 | High     |
| 18 | Chan et al <sup>50</sup>              | Analytical cross-sectional | Obs-4  | X | X | N/A | X | X   | X   | X   | -   | - | - | - | - | - | 0/6  | 0.0  | Low      |
| 19 | Farhana et al <sup>51</sup>           | Case series                | Des-3  | X | X | X   | V | V   | V   | V   | X   | V | V | - | - | - | 6/10 | 60.0 | Low      |
| 20 | Chan et al <sup>52</sup>              | Analytical cross-sectional | Obs-4  | X | X | N/A | X | X   | X   | X   | -   | - | - | - | - | - | 0/6  | 0.0  | Low      |
| 21 | Murty <sup>53</sup>                   | Case report                | Des-4  | V | V | V   | V | N/A | N/A | N/A | X   | - | - | - | - | - | 4/5  | 80.0 | High     |
| 22 | Murty et al <sup>54</sup>             | Case series                | Des-3  | X | X | X   | V | X   | X   | V   | N/A | V | V | - | - | - | 4/9  | 44.4 | Low      |
| 23 | Mustafa et al <sup>55</sup>           | Prevalence                 | Des-2  | V | X | X   | X | X   | V   | V   | V   | X | - | - | - | - | 4/9  | 44.4 | Low      |
| 24 | Su et al <sup>56</sup>                | Analytical cross-sectional | Obs-4  | V | X | V   | X | X   | V   | V   | -   | - | - | - | - | - | 4/7  | 57.1 | Moderate |
| 25 | Daher et al <sup>57</sup>             | Prevalence                 | Des-2  | V | V | X   | V | X   | V   | N/A | V   | V | - | - | - | - | 6/8  | 75.0 | High     |
| 26 | Ratnasingam et al <sup>58</sup>       | Prevalence                 | Des-2  | X | X | X   | X | X   | X   | X   | V   | X | - | - | - | - | 1/9  | 11.1 | Low      |
| 27 | Ab Rahman & Abdullah <sup>59</sup>    | Case report                | Des-4  | V | V | V   | V | V   | V   | X   | V   | - | - | - | - | - | 7/8  | 87.5 | High     |
| 28 | Taib & Baba <sup>60</sup>             | Case series                | Des-3  | X | X | X   | V | X   | X   | V   | X   | V | X | - | - | - | 3/10 | 30.0 | Low      |
| 29 | Osman et al <sup>61</sup>             | Prevalence                 | Des-3  | X | X | X   | V | X   | V   | N/A | V   | V | - | - | - | - | 4/8  | 50.0 | Low      |
| 30 | Minhat et al <sup>62</sup>            | Prevalence                 | Des-2  | X | X | X   | X | X   | V   | N/A | X   | V | - | - | - | - | 2/8  | 25.0 | Low      |
| 31 | Mendelsohn et al <sup>63</sup>        | Qualitative                | Qual-2 | V | V | V   | V | V   | X   | V   | V   | V | V | - | - | - | 9/10 | 90.0 | High     |
| 32 | Mendelsohn et al <sup>64</sup>        | Analytical cross-sectional | Obs-4  | V | V | N/A | V | V   | X   | V   | -   | - | - | - | - | - | 5/6  | 83.3 | High     |

|    |                                 |                            |       |   |   |     |   |   |   |   |   |     |   |   |   |   |      |      |          |
|----|---------------------------------|----------------------------|-------|---|---|-----|---|---|---|---|---|-----|---|---|---|---|------|------|----------|
| 33 | Kwan et al <sup>65</sup>        | Case series                | Des-3 | X | V | X   | V | X | X | V | X | X   | V | - | - | - | 4/10 | 40.0 | Low      |
| 34 | Santos et al <sup>66</sup>      | Prevalence                 | Des-3 | X | X | X   | X | V | V | V | V | V   | - | - | - | - | 5/9  | 55.6 | Moderate |
| 35 | Razali et al <sup>67</sup>      | Case series                | Des-3 | V | V | V   | V | X | V | V | X | V   | V | - | - | - | 8/10 | 80.0 | High     |
| 36 | Elmi et al <sup>68</sup>        | Case control               | Obs-3 | X | V | V   | X | V | X | V | X | X   | V | - | - | - | 5/10 | 50.0 | Low      |
| 37 | Santos et al <sup>69</sup>      | Prevalence                 | Des-2 | X | X | X   | X | V | V | V | X | V   | - | - | - | - | 4/9  | 44.4 | Low      |
| 38 | William et al <sup>70</sup>     | Prevalence                 | Des-2 | V | V | V   | X | V | V | V | V | X   | - | - | - | - | 7/9  | 77.8 | High     |
| 39 | Siah et al <sup>71</sup>        | Prevalence                 | Des-2 | X | X | X   | X | X | V | X | X | X   | - | - | - | - | 1/9  | 11.1 | Low      |
| 40 | Guinto et al <sup>72</sup>      | Scoping review             | -     | - | - | -   | - | - | - | - | - | -   | - | - | - | - | -    | -    | -        |
| 41 | Vijjian et al <sup>73</sup>     | Analytical cross-sectional | Obs-4 | V | X | N/A | X | X | X | X | - | -   | - | - | - | - | 1/6  | 16.7 | Low      |
| 42 | Azian et al <sup>74</sup>       | Prevalence                 | Des-2 | X | X | X   | X | X | V | X | X | X   | - | - | - | - | 1/9  | 11.1 | Low      |
| 43 | Sahimin et al <sup>75</sup>     | Prevalence                 | Des-2 | X | X | X   | X | X | V | V | V | X   | - | - | - | - | 3/9  | 33.3 | Low      |
| 44 | Noh et al <sup>76</sup>         | Prevalence                 | Des-2 | X | X | X   | X | X | V | X | V | X   | - | - | - | - | 2/9  | 22.2 | Low      |
| 45 | Kamaludin & How <sup>77</sup>   | Analytical cross-sectional | Obs-4 | V | X | N/A | X | X | V | V | - | -   | - | - | - | - | 3/6  | 50.0 | Low      |
| 46 | Min et al <sup>78</sup>         | Prevalence                 | Des-3 | V | V | V   | X | V | X | X | V | N/A | - | - | - | - | 5/8  | 62.5 | Moderate |
| 47 | Woh et al <sup>79</sup>         | Prevalence                 | Des-3 | X | X | X   | V | V | V | X | V | X   | - | - | - | - | 4/9  | 44.4 | Low      |
| 48 | Tanabe et al <sup>80</sup>      | Mixed method               | -     | - | - | -   | - | - | - | - | - | -   | - | - | - | - | -    | -    | -        |
| 49 | Ratnalingam et al <sup>81</sup> | Prevalence                 | Des-2 | V | X | X   | X | V | V | X | X | X   | - | - | - | - | 3/9  | 33.3 | Low      |

|    |                                |                             |        |   |   |   |   |   |   |   |   |   |   |   |   |   |      |      |          |
|----|--------------------------------|-----------------------------|--------|---|---|---|---|---|---|---|---|---|---|---|---|---|------|------|----------|
| 50 | Woh et al <sup>82</sup>        | Prevalence                  | Des-2  | X | X | X | X | X | V | X | V | X | - | - | - | - | 2/9  | 22.2 | Low      |
| 51 | Noor & Shaker <sup>83</sup>    | Analytical cross-sectional  | Obs-4  | V | X | V | V | V | V | V | - | - | - | - | - | - | 6/7  | 85.7 | High     |
| 52 | Noordin et al <sup>84</sup>    | Prevalence                  | Des-3  | X | X | X | X | V | V | X | V | X | - | - | - | - | 3/9  | 33.3 | Low      |
| 53 | Sahimin et al <sup>85</sup>    | Prevalence                  | Des-2  | X | X | X | V | X | V | V | V | X | - | - | - | - | 4/9  | 44.4 | Low      |
| 54 | Labao et al <sup>86</sup>      | Prevalence                  | Des-3  | X | X | X | X | V | V | V | V | V | - | - | - | - | 5/9  | 55.6 | Moderate |
| 55 | Shaw et al <sup>87</sup>       | Randomised controlled trial | Exp-2  | X | X | X | X | X | X | X | X | V | V | V | V | X | 4/13 | 30.8 | Low      |
| 56 | Rahman et al <sup>88</sup>     | Case control                | Obs-3  | X | V | V | X | V | X | V | X | V | V | - | - | - | 6/10 | 60.0 | Moderate |
| 57 | Sahimin et al <sup>89</sup>    | Prevalence                  | Des-2  | X | X | X | V | X | V | V | V | X | - | - | - | - | 4/9  | 44.4 | Low      |
| 58 | Nwabichie et al <sup>90</sup>  | Prevalence                  | Des-2  | V | V | X | X | V | V | V | V | V | - | - | - | - | 7/9  | 77.8 | High     |
| 59 | Jeffree et al <sup>91</sup>    | Case control                | Obs-3  | X | V | V | X | V | X | X | V | V | V | - | - | - | 6/10 | 60.0 | Moderate |
| 60 | Zerguine et al <sup>92</sup>   | Analytical cross-sectional  | Obs-4  | X | V | V | X | X | V | V | - | - | - | - | - | - | 4/7  | 57.1 | Moderate |
| 61 | Ya'acob et al <sup>93</sup>    | Randomised controlled Trial | Exp-2  | X | X | V | X | X | X | V | X | X | V | V | V | X | 5/13 | 38.5 | Low      |
| 62 | Chuah et al <sup>9</sup>       | Qualitative                 | Qual-2 | V | V | V | V | V | X | V | X | V | V | - | - | - | 8/10 | 80.0 | High     |
| 63 | Loganathan et al <sup>94</sup> | Qualitative                 | Qual-2 | X | V | V | V | V | X | V | V | V | V | - | - | - | 8/10 | 80.0 | High     |
| 64 | Rahman et al <sup>95</sup>     | Prevalence                  | Des-3  | X | X | X | X | V | X | X | V | V | - | - | - | - | 3/9  | 33.3 | Low      |
| 65 | Siah et al <sup>96</sup>       | Qualitative                 | Qual-3 | X | V | X | V | V | X | X | X | V | V | - | - | - | 5/10 | 50.0 | Low      |
| 66 | Sahimin et al <sup>97</sup>    | Prevalence                  | Des-2  | X | X | X | V | X | V | X | V | X | - | - | - | - | 3/9  | 33.3 | Low      |



|    |                           |             |        |   |   |   |   |   |   |   |   |   |   |   |   |   |      |      |      |
|----|---------------------------|-------------|--------|---|---|---|---|---|---|---|---|---|---|---|---|---|------|------|------|
| 67 | Chuah et al <sup>98</sup> | Qualitative | Qual-2 | V | V | V | V | V | X | V | X | V | V | - | - | - | 8/10 | 80.0 | High |
|----|---------------------------|-------------|--------|---|---|---|---|---|---|---|---|---|---|---|---|---|------|------|------|

1  
2  
3  
4  
5  
6  
7  
8  
9  
10  
11  
12  
13  
14  
15  
16  
17  
18  
19  
20  
21  
22  
23  
24  
25  
26  
27  
28  
29  
30  
31  
32  
33  
34  
35  
36  
37  
38  
39  
40  
41  
42  
43  
44  
45  
46

For peer review only

# BMJ Open

## Developing an evidence assessment framework and appraising the academic literature on migrant health in Malaysia: a scoping review

|                                 |                                                                                                                                                                                                                                                                                                                                                                                                                                                                                                                                                                                                                                                                                                                                                                                                                                                                                                        |
|---------------------------------|--------------------------------------------------------------------------------------------------------------------------------------------------------------------------------------------------------------------------------------------------------------------------------------------------------------------------------------------------------------------------------------------------------------------------------------------------------------------------------------------------------------------------------------------------------------------------------------------------------------------------------------------------------------------------------------------------------------------------------------------------------------------------------------------------------------------------------------------------------------------------------------------------------|
| Journal:                        | <i>BMJ Open</i>                                                                                                                                                                                                                                                                                                                                                                                                                                                                                                                                                                                                                                                                                                                                                                                                                                                                                        |
| Manuscript ID                   | bmjopen-2020-041379.R2                                                                                                                                                                                                                                                                                                                                                                                                                                                                                                                                                                                                                                                                                                                                                                                                                                                                                 |
| Article Type:                   | Original research                                                                                                                                                                                                                                                                                                                                                                                                                                                                                                                                                                                                                                                                                                                                                                                                                                                                                      |
| Date Submitted by the Author:   | 02-Dec-2020                                                                                                                                                                                                                                                                                                                                                                                                                                                                                                                                                                                                                                                                                                                                                                                                                                                                                            |
| Complete List of Authors:       | de Smalen, Allard; United Nations University-Maastricht Economic and Social Research Institute on Innovation and Technology; Maastricht University, Maastricht Graduate School of Governance<br>Chan, Zhie; United Nations University International Institute for Global Health<br>Abreu Lopes, Claudia; United Nations University, International Institute for Global Health<br>Vanore, Michaella; United Nations University-Maastricht Economic and Social Research Institute on Innovation and Technology; Maastricht University, Maastricht Graduate School of Governance<br>Loganathan, Tharani; University of Malaya, Centre for Epidemiology and Evidence-based Practice, Department of Social and Preventive Medicine<br>Pocock, Nicola S.; London School of Hygiene & Tropical Medicine, Gender Violence & Health Centre; United Nations University International Institute for Global Health |
| <b>Primary Subject Heading</b>: | Global health                                                                                                                                                                                                                                                                                                                                                                                                                                                                                                                                                                                                                                                                                                                                                                                                                                                                                          |
| Secondary Subject Heading:      | Research methods, Public health                                                                                                                                                                                                                                                                                                                                                                                                                                                                                                                                                                                                                                                                                                                                                                                                                                                                        |
| Keywords:                       | STATISTICS & RESEARCH METHODS, PUBLIC HEALTH, HEALTH SERVICES ADMINISTRATION & MANAGEMENT                                                                                                                                                                                                                                                                                                                                                                                                                                                                                                                                                                                                                                                                                                                                                                                                              |
|                                 |                                                                                                                                                                                                                                                                                                                                                                                                                                                                                                                                                                                                                                                                                                                                                                                                                                                                                                        |

SCHOLARONE™  
Manuscripts

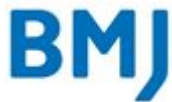

I, the Submitting Author has the right to grant and does grant on behalf of all authors of the Work (as defined in the below author licence), an exclusive licence and/or a non-exclusive licence for contributions from authors who are: i) UK Crown employees; ii) where BMJ has agreed a CC-BY licence shall apply, and/or iii) in accordance with the terms applicable for US Federal Government officers or employees acting as part of their official duties; on a worldwide, perpetual, irrevocable, royalty-free basis to BMJ Publishing Group Ltd ("BMJ") its licensees and where the relevant Journal is co-owned by BMJ to the co-owners of the Journal, to publish the Work in this journal and any other BMJ products and to exploit all rights, as set out in our [licence](#).

The Submitting Author accepts and understands that any supply made under these terms is made by BMJ to the Submitting Author unless you are acting as an employee on behalf of your employer or a postgraduate student of an affiliated institution which is paying any applicable article publishing charge ("APC") for Open Access articles. Where the Submitting Author wishes to make the Work available on an Open Access basis (and intends to pay the relevant APC), the terms of reuse of such Open Access shall be governed by a Creative Commons licence – details of these licences and which [Creative Commons](#) licence will apply to this Work are set out in our licence referred to above.

Other than as permitted in any relevant BMJ Author's Self Archiving Policies, I confirm this Work has not been accepted for publication elsewhere, is not being considered for publication elsewhere and does not duplicate material already published. I confirm all authors consent to publication of this Work and authorise the granting of this licence.

TITLE

1  
2  
3  
4  
5 1 **Developing an evidence assessment framework and**  
6  
7  
8  
9 2 **appraising the academic literature on migrant**  
10  
11  
12 3 **health in Malaysia: a scoping review**  
13  
14  
15  
16 4

17  
18 5 Allard W. de Smalen<sup>1,2</sup>, Zhie X. Chan<sup>3</sup>, Claudia Abreu Lopes<sup>3</sup>, Michaella Vanore<sup>1,2</sup>, Tharani  
19  
20 6 Loganathan<sup>4</sup>, Nicola S. Pocock<sup>3,5</sup>.  
21  
22  
23 7

24  
25 8 <sup>1</sup>Maastricht Graduate School of Governance, Maastricht University, Maastricht, The  
26  
27 9 Netherlands.  
28

29  
30 10 <sup>2</sup>United Nations University - Maastricht Economic and Social Research Institute on  
31  
32 11 Innovation and Technology (UNU-MERIT), Maastricht, The Netherlands.  
33

34  
35 12 <sup>3</sup>United Nations University - International Institute for Global Health (UNU-IIGH), Kuala  
36  
37 13 Lumpur, Malaysia.  
38

39  
40 14 <sup>4</sup>Centre for Epidemiology and Evidence-based Practice, Department of Social and Preventive  
41  
42 15 Medicine, University of Malaya, Kuala Lumpur, Malaysia  
43

44  
45 16 <sup>5</sup>Gender Violence & Health Centre, London School of Hygiene and Tropical Medicine,  
46  
47 17 London, United Kingdom.  
48

49  
50 18  
51 19 Allard W. de Smalen (corresponding author)

52  
53 20 E-mail: [allarddesmalen@gmail.com](mailto:allarddesmalen@gmail.com)  
54  
55

56  
57 21 Word count: 6959  
58  
59  
60

## ABSTRACT

**Abstract**

**Background:** A large number of international migrants in Malaysia face challenges in obtaining good health, the extent of which is still relatively unknown. This study aims to map the existing academic literature on migrant health in Malaysia and to provide an overview of the topical coverage, quality, and level of evidence of these scientific studies.

**Methods:** A scoping review was conducted using six databases, including Econlit, Embase, Global Health, Medline, PsycInfo, and Social Policy and Practice. Studies were eligible for inclusion if they were conducted in Malaysia, peer-reviewed, focused on a health dimension according to the Bay Area Regional Health Inequities Initiative (BARHII) framework, and targeted the vulnerable international migrant population. Data were extracted by using the BARHII framework and a newly developed decision tree to identify the type of study design and corresponding level of evidence. Modified Joanna Briggs Institute (JBI) checklists were used to assess study quality, and a multiple-correspondence analysis (MCA) was conducted to identify associations between different variables.

**Results:** 67 publications met the selection criteria and were included in the study. The majority (n=41) of studies included foreign workers. Over two-thirds (n=46) focused on disease and injury, and a similar number (n=46) had descriptive designs. The average quality of the papers was low, yet quality differed significantly among them. The MCA showed that high-quality studies were mostly qualitative designs that included refugees and focused on living conditions, while prevalence and analytical cross-sectional studies were mostly low quality.

## ABSTRACT

1  
2  
3 43 **Conclusion:** This study provides an overview of the scientific literature on migrant health in  
4  
5 44 Malaysia published between 1965 and 2019. In general, the quality of these studies is low,  
6  
7 45 and various health dimensions have not been thoroughly researched. Therefore, researchers  
8  
9 46 should address these issues to improve the evidence base to support policymakers with high-  
10  
11 47 quality evidence for decision-making.  
12  
13  
14

15 48 **Key Words:** Malaysia, migrant, health, refugee, foreign worker, disease, evidence  
16  
17  
18 49 assessment framework  
19  
20  
21  
22  
23  
24  
25  
26  
27  
28  
29  
30  
31  
32  
33  
34  
35  
36  
37  
38  
39  
40  
41  
42  
43  
44  
45  
46  
47  
48  
49  
50  
51  
52  
53  
54  
55  
56  
57  
58  
59  
60

## ABSTRACT

**Article summary****Strengths and limitations of this study**

- This study provides a comprehensive overview of migrant health research in Malaysia, including a summary table, critical assessment tables, and a multiple-correspondence analysis (MCA).
- Methodological contributions by creating an evidence assessment framework, including a decision tree that identifies the type of study design and corresponding level of evidence, and modified Joanna Briggs Institute (JBI) checklists.
- Exclusive focus on vulnerable migrants within the non-citizen population in Malaysia.
- Only English peer-reviewed academic articles were included in this study, and, therefore, much relevant information that could potentially be used to inform both policies and practice may have been excluded from this review.

## 62 Introduction

63 Worldwide, the international migrant population accounts for approximately 272 million  
 64 people, with almost one-third within Asia.<sup>1</sup> Due to its strategic geographic location and high  
 65 labour demand, Malaysia is among the top destination countries for international migrants in  
 66 the Asian region.<sup>2</sup> According to the Department of Statistics Malaysia (DOSM), the  
 67 documented non-citizen population represented 3.2 million people in 2019, which accounts  
 68 for 10% of Malaysia's total population.<sup>3</sup> DOSM defines a non-citizen as a person that resides  
 69 in Malaysia for six months or more in the reference year.<sup>4</sup> However, no subcategories were  
 70 included in this definition. According to the Office of the United Nations High Commissioner  
 71 for Human Rights (OHCHR), a non-citizen is an individual that does not have an effective  
 72 connection with the location where the person is situated according to the host nation, and  
 73 includes various types of migrants, such as foreigners with permanent residency, refugees,  
 74 asylum seekers, foreign labour, international students, stateless individuals, and victims of  
 75 human trafficking.<sup>5</sup> Other definitions of migrant-related terms that are used in this paper are  
 76 presented in Table 1.

**Table 1 | Definitions of migrant-related terms**

| Term                                                              | Definition                                                                                                                                                                                                                                                                                                                                                                                                                                                                        |
|-------------------------------------------------------------------|-----------------------------------------------------------------------------------------------------------------------------------------------------------------------------------------------------------------------------------------------------------------------------------------------------------------------------------------------------------------------------------------------------------------------------------------------------------------------------------|
| Regular migrant worker (documented or legal migrant worker)       | "A migrant worker or members of his or her family authorised to enter, to stay and to engage in a remunerated activity in the State of employment pursuant to the law of that State and to international agreements to which that State is a party." <sup>6(p. 29)</sup>                                                                                                                                                                                                          |
| Irregular migrant worker (undocumented or illegal migrant worker) | "Migrant workers or members of their families, who are not authorised to enter, to stay or to engage in employment in a State." <sup>6(p. 102)</sup>                                                                                                                                                                                                                                                                                                                              |
| Refugee                                                           | "A person who, owing to a well-founded fear of persecution for reasons of race, religion, nationality, membership of a particular social group or political opinions, is outside the country of his nationality and is unable or, owing to such fear, is unwilling avail himself of the protection of that country." <sup>6(p. 79)</sup>                                                                                                                                          |
| Asylum seeker                                                     | "A person who seeks safety from persecutions or serious harm in a country other than his or her own and awaits a decision on the application for refugee status under relevant international and national instruments. In case of a negative decision, the person must leave the country and may be expelled, as may any non-national in an irregular or unlawful situation, unless permission to stay is provided on humanitarian or other related grounds." <sup>6(p. 12)</sup> |



## Materials and Methods

1  
2  
3 77 The vast majority of non-citizens in Malaysia are migrant workers, where foreign labour can  
4  
5 78 be divided according to their visa status into regular and irregular migrant workers.  
6  
7  
8 79 According to the Ministry of Home Affairs (MOHA), Malaysia issued 2 million work permits  
9  
10 80 to documented migrant workers in 2019.<sup>7</sup> However, the total number of migrant workers,  
11  
12 81 both documented and undocumented, is estimated to fall between 4.2 and 6.2 million people.<sup>2</sup>  
13  
14 82 Another group that contributes significantly to the non-citizen population in Malaysia are  
15  
16 83 refugees and asylum seekers. The terms refugees and asylum seekers are often used  
17  
18 84 interchangeably, yet, these populations differ by their legal status in destination countries and  
19  
20 85 subsequent vulnerabilities (see definitions in Table 1). In 2019, an approximate 178,580  
21  
22 86 refugees and asylum seekers were registered with the United Nations High Commissioner for  
23  
24 87 Refugees (UNHCR) in Malaysia, where 153,770 (86%) came from Myanmar. The remaining  
25  
26 88 number (14%) came from Yemen, Syria, Afghanistan, Iraq, Palestine, Pakistan, Sri Lanka,  
27  
28 89 Somalia, and other countries.<sup>8</sup>  
29  
30  
31  
32  
33 90  
34  
35  
36 91 Refugees, asylum seekers, and both documented and undocumented low-skilled foreign  
37  
38 92 workers can be classified as vulnerable migrants in Malaysia, as these populations may face  
39  
40 93 significant hardships in their new country of residence.<sup>9 10</sup> Vulnerable migrants are more  
41  
42 94 prone to being exploited and abused, have an increased need to be protected by duty-bearers,  
43  
44 95 and are not able to fully benefit from their human rights.<sup>11</sup> Health is among these affected  
45  
46 96 human rights, as migrant workers and refugees could encounter various challenges to  
47  
48 97 maintain proper health and prevent poor health outcomes, including difficulties in accessing  
49  
50 98 healthcare and obtaining quality health services.<sup>11-13</sup> According to Sweileh et al,<sup>14</sup> assessing  
51  
52 99 the current status of scientific output and identifying research gaps could positively contribute  
53  
54  
55 100 towards improving the evidence base for advocating for migrant health needs. Scoping  
56  
57  
58  
59  
60

## Materials and Methods

1  
2  
3 101 reviews can be helpful to map the academic literature and have been used by different  
4  
5 102 researchers to present the available evidence on migrant health issues in other countries.<sup>15 16</sup>  
6  
7

8 103  
9  
10  
11 104 Despite the burgeoning academic literature on migrant health in Malaysia, health information  
12  
13 105 on migrant-related issues is still limited, and public data remains difficult to access.  
14  
15 106 Aggravating the matter, there is no overall picture currently available of the evidence base on  
16  
17 107 migrant health in Malaysia, including critical appraisal of the quality of research. Therefore,  
18  
19 108 this study aims to map the existing academic literature on migrant health in Malaysia since  
20  
21 109 1965 to identify the trends and gaps in this field, as well as to present an overview of the  
22  
23 110 topical coverage, quality, and level of evidence of these scientific studies.  
24  
25  
26  
27  
28  
29  
30  
31  
32  
33  
34  
35  
36  
37  
38  
39  
40  
41  
42  
43  
44  
45  
46  
47  
48  
49  
50  
51  
52  
53  
54  
55  
56  
57  
58  
59  
60

## 111 **Method**

### 112 **General methods**

113 A scoping review was conducted, following the Preferred Reporting Items for Systematic  
114 reviews and Meta-Analyses – Extension for Scoping Reviews (PRISMA-ScR) guidelines<sup>17</sup>  
115 (Supplementary file 1). A pre-review protocol was developed to guide decisions for literature  
116 selection and structure of the review, and included the review question, aim, search strategy,  
117 selection criteria, and risk of bias assessment. However, the protocol was not formally  
118 registered and changed to some extent over the course of this review. The pre-review  
119 protocol can be accessed on request from the first author. Data were extracted and organised  
120 using the Bay Area Regional Health Inequities Initiative (BARHII) framework.<sup>18</sup> In addition,  
121 a decision tree was developed to classify the type of study design and level of evidence of  
122 each journal article. Subsequently, a quality assessment of the included literature was  
123 conducted by using the Joanna Briggs Institute (JBI) critical appraisal toolkit.<sup>19</sup> Lastly, the  
124 data was analysed, and a multiple-correspondence analysis (MCA) was applied to explore  
125 existing relationships between variables, including the type of migrant, main health  
126 dimension, quality of the study, and research design.

### 127 **Patient and public involvement**

128 Patients and the public were not involved in this study.

### 129 **Conceptual framework**

130 The Bay Area Regional Health Inequities Initiative (BARHII) framework was utilised to  
131 organise the identified literature in this scoping review into specific factors that shape  
132 equitable health outcomes (Figure 1). The BARHII framework was selected due to its  
133 comprehensive nature and inclusion of various health dimensions, whereas other models

## Materials and Methods

1  
2  
3 134 focused on specific public health elements or lacked clear explanation regarding the included  
4  
5 135 health-related components of the model.<sup>20 21</sup>  
6  
7

8 136  
9

10  
11 137 [INSERT FIGURE 1]  
12  
13

14 138  
15  
16

17 139 The BARHII framework consists of six dimensions: 1) social inequities; 2) institutional  
18  
19 140 inequities; 3) living conditions; 4) risk behaviour; 5) disease and injury; and 6) mortality. In  
20  
21 141 addition, each health dimension contains various subdimensions (as presented in Figure 1).  
22  
23

24 142 Except for ‘social inequities,’ the other five categories were used to describe which health  
25  
26 143 dimension the particular articles focused on. The social inequities element was incorporated  
27  
28 144 by describing the population of interest, which was divided into three categories: foreign  
29  
30 145 workers, asylum seekers and refugees, and unclassified migrants. The lattermost category  
31  
32 146 was applied if a paper used the term ‘migrants’ or ‘immigrants’ but lacked specific  
33  
34 147 information to classify the study population as foreign workers or asylum seekers/refugees.  
35  
36  
37

38 148 Institutional inequities include the practices of corporations, businesses, government  
39  
40 149 agencies, schools, not-for-profit organisations as well as laws, regulations, and policies that  
41  
42 150 could influence health outcomes (e.g., a regulation that obligates companies to financially  
43  
44 151 compensate an individual in case of a work incident).  
45  
46  
47

48 152 Living conditions consist of the physical environment (e.g., indoor air pollution), economic  
49  
50 153 and work environment (e.g., unemployment), social environment (e.g., discrimination in the  
51  
52 154 neighbourhood), and service environment (e.g., healthcare) that people live in, and that play a  
53  
54 155 role in determining their health outcomes (e.g., denied healthcare access due to visa status).  
55  
56  
57  
58  
59  
60

## Materials and Methods

1  
2  
3 156 Risk behaviour includes smoking, poor nutrition, low physical activity, violence, alcohol and  
4  
5 157 other drugs, and sexual behaviour. This dimension reflects the way someone acts and how  
6  
7 158 that increases or decreases the risk of obtaining a particular health outcome (e.g., the attitude  
8  
9  
10 159 and related behaviour towards smoking could influence an individual's level of risk of  
11  
12 160 developing lung cancer).

13  
14  
15 161 Disease and injury consist of communicable diseases (also known as infectious diseases; e.g.,  
16  
17 162 chlamydia), chronic diseases (also known as non-communicable diseases; e.g., cancer), and  
18  
19 163 injuries (e.g., fractured bone). This dimension describes the number of people or individual  
20  
21  
22 164 cases with a particular health outcome (e.g., ten out of the 100 people suffered from cancer).

23  
24  
25 165 Mortality was changed to 'mortality and morbidity' and focused on death and disease rates of  
26  
27 166 the study population (e.g., ten out of 1,000 live births of children under the age of one died)  
28  
29 167 to distinguish epidemiological studies with larger samples from descriptive studies with  
30  
31 168 smaller samples, where the latter were categorised as disease and injury studies.

32  
33  
34  
35 169 Furthermore, some additional subdimensions were created during the data extraction stage, as  
36  
37 170 these were lacking in the original BARHII framework (e.g., the subdimension 'mental health'  
38  
39 171 was added to the disease and injury dimension).

### 172 **Search strategy**

173 Based on the guidelines of the London School of Hygiene and Tropical Medicine<sup>22</sup> and  
174 Bramer et al<sup>23</sup> on selecting the number and types of databases that should be included in  
175 biomedical systematic searches, six databases were selected for this study: Econlit, Embase,  
176 Global Health, Medline, PsycInfo, and Social Policy and Practice. This scoping review  
177 includes studies from 1965 onwards until 2019. However, all identified records were  
178 retrieved from the six databases to manually screen the data for publication date-related  
179 issues. The search process was conducted by AS and included a two-stage procedure to

## Materials and Methods

1  
2  
3 180 ensure that the search was exhaustive and to minimise the risk of missing potentially eligible  
4  
5 181 studies. The first stage focused on identifying English-language key words and Medical  
6  
7 182 Subject Headings (MeSH) terms for migrants (e.g., immigrants, foreign workers, refugees),  
8  
9 183 health (e.g., disease, infection, disorder), and Malaysia (e.g., Sabah, Kuala Lumpur) through  
10  
11 184 reading search strategies of other review studies on migrant health as well as utilising medical  
12  
13 185 terminology of renowned medical institutions, such as the Mayo Clinic. Subsequently, these  
14  
15 186 items were combined by using Boolean operators (e.g., migrant AND health AND Malaysia)  
16  
17 187 in the search platform of each database (Supplementary file 2).  
18  
19  
20  
21

**188 Selection criteria**

22  
23  
24  
25 189 Studies were eligible for inclusion if they met the following inclusion criteria: 1) conducted  
26  
27 190 in Malaysia, including cross-national studies in which Malaysia was included; 2) published in  
28  
29 191 peer-reviewed academic journals; 3) primary outcomes of the study included a health-related  
30  
31 192 variable from at least one of the five health dimensions of the BARHII framework; 4)  
32  
33 193 employment of one of the following study designs: literature synthesis (systematic review,  
34  
35 194 meta-analysis, other scientific review designs), qualitative (interviews, focus group  
36  
37 195 discussions), and/or quantitative (randomised controlled trial, cohort, case-control, cross-  
38  
39 196 sectional, case series, case report) study design; 5) written in English; 6) inclusion of  
40  
41 197 international (im)migrants, foreign workers, asylum seekers, and refugees, as these groups  
42  
43 198 were considered as vulnerable migrant populations in Malaysia. Articles that included both  
44  
45 199 migrants and the general population were included in this study if sufficient information  
46  
47 200 concerning the migrant population was available.  
48  
49  
50  
51  
52

53 201 Studies were excluded if they were: 1) conducted or included data from 1965 or earlier, as  
54  
55 202 Singapore was part of Malaysia until 1965, and this study is careful to only include Malaysia  
56  
57 203 studies without Singapore; 2) grey literature; 3) opinion papers, editorials, fieldnotes of  
58  
59  
60

## Materials and Methods

1  
2  
3 204 symposia, conferences and workshop abstracts; 4) focused on non-citizens and foreigners,  
4  
5 205 where it was unclear whether a vulnerable migrant population was included (such as  
6  
7 206 permanent residents, naturalised persons, expatriates, temporary visitors, tourists, Malaysian  
8  
9 207 returnees, and international students); 5) only presented migrants as a control variable and no  
10  
11 208 other information regarding migrants was available.  
12  
13  
14

209 **Data extraction**

15  
16  
17  
18 210 Three reviewers (AWS, ZXC, and NSP) were involved in the screening process, where all  
19  
20 211 had experience in the domain of public health and AWS and NSP had practical knowledge  
21  
22 212 with respect to conducting systematic reviews due to previous research work. Titles and  
23  
24 213 abstracts were exported by AWS and subsequently moved into Rayyan, an open-source  
25  
26 214 software designed to support systematic reviews. AWS and ZXC were the main reviewers,  
27  
28 215 where AWS conducted an entire screening of titles and abstracts and ZXC assessed a  
29  
30 216 randomly selected 20% sample. Independent screening was carried out by using the 'blind'  
31  
32 217 function of Rayyan, with both researchers working separately. The first stage involved  
33  
34 218 screening titles and abstracts according to the inclusion criteria. Subsequently, AWS and  
35  
36 219 ZXC conducted an independent full-text screening of all potential articles and attached  
37  
38 220 comments to each article on why the paper was included or excluded. After each screening  
39  
40 221 stage, AWS and ZXC compared their findings and discussed the discrepancies. In both  
41  
42 222 stages, the discrepancies were about 13% to 14% of the papers and were mostly around the  
43  
44 223 study design and target populations. Conflicts were examined and resolved by NSP.  
45  
46  
47  
48 224 Following the full-text screening stage, the data were extracted by one reviewer (AWS) and  
49  
50 225 disaggregated by the different dimensions of the BARHII framework, including the type of  
51  
52 226 migrant (social inequities), main health dimension (institutional inequities, living conditions,  
53  
54 227 risk behaviour, disease and injury, and mortality and morbidity), and health subdimensions.  
55  
56  
57  
58  
59  
60

## Materials and Methods

228 For the next stage, a decision tree was developed to ensure that the correct quality appraisal  
 229 tool by study design was selected and to identify the level of evidence of the included  
 230 literature (Figure 2). Although various research designs were included in the decision tree,  
 231 some study designs did not fit in this model, such as the mixed-method design.

232

233 [INSERT FIGURE 2]

234

235 The decision tree built on the study design tree from the Centre for Evidence-Based Medicine  
 236 (CEBM)<sup>24</sup> and essentially allowed research of varying designs to be consistently, reliably  
 237 classified into one of several design families. The newly developed decision tree was created  
 238 through a two-step process. First, a table was created that included definitions of various  
 239 research designs, and, subsequently, specific traits of these definitions were used to develop  
 240 guiding questions for the decision tree (Table 2).

Table 2 | Definitions of included study designs

| Study design                      | Definition                                                                                                                                                                                                                                                                                                               |
|-----------------------------------|--------------------------------------------------------------------------------------------------------------------------------------------------------------------------------------------------------------------------------------------------------------------------------------------------------------------------|
| Analytical studies                | Studies that strive to quantify the relationship between a particular exposure or intervention and the outcome of interest, where these studies include a comparison group to compare the outcome rates. <sup>24</sup>                                                                                                   |
| Systematic review                 | A study that is conducted systematically to collect all published evidence – that comply with the specified inclusion criteria – and provide a summary of the results to answer a specific research question. <sup>25</sup>                                                                                              |
| Randomised controlled trial (RCT) | An experimental study that includes at least two groups – treatment group and control group – to compare the outcomes between the group that received the intervention/drug and the group that received a placebo/no treatment. The participants of the group are randomly allocated to one of the groups. <sup>26</sup> |
| Quasi-experimental study/non-RCT  | An experimental study that includes at least two groups – treatment group and control group – to compare the outcomes between the group that received the intervention/drug and the group that received a placebo. The participants of the group are not randomly allocated to one of the groups. <sup>27</sup>          |
| Cohort study                      | A study that follows a group of people over time, where the participants are sampled based on the presence or absence of a particular exposure to compare the outcome of interest with a control group. <sup>26</sup>                                                                                                    |
| Case-control study                | A study that includes a group of people selected on the outcome of interest (cases) and a group without the outcome of interest (controls), followed by assessing previous exposure of both groups to determine if there is a relationship between the level of exposure and outcome of interest. <sup>26</sup>          |
| Analytical cross-sectional        | A study that looks at two groups – exposed and unexposed – and the outcome of interest at a particular point or period of time to compare the differences between the two groups. <sup>26</sup>                                                                                                                          |



## Materials and Methods

|                     |                                                                                                                                                                                                                                                      |
|---------------------|------------------------------------------------------------------------------------------------------------------------------------------------------------------------------------------------------------------------------------------------------|
| Descriptive studies | Studies that do not strive to quantify a relationship between variables, but simply describe the disease outcome and characteristics within a defined population. Note that descriptive studies can still include analytic components. <sup>24</sup> |
| Prevalence study    | A study that looks at a population at a particular point or period of time to describe the prevalence of an outcome of interest. <sup>26</sup>                                                                                                       |
| Case series         | A study where only subjects are included with a particular outcome of interest to describe the shared and diverging characteristics of this study population. <sup>28</sup>                                                                          |
| Case report         | A study that describes an unfamiliar or extraordinary outcome of one individual. <sup>28</sup>                                                                                                                                                       |

241

242 Second, Tomlin & Borgetto's<sup>29</sup> model was utilised to identify the level of evidence of the  
 243 included literature, as the study designs that were included in their model were in line with  
 244 the research designs in the definitions table. In addition, it was one of the few models that  
 245 deconstructed the single-hierarchy framework and assigned study designs to different  
 246 categories depending on the study objective (e.g., if the study design did not aim to provide a  
 247 causal-relationship, but simply describe a particular outcome, the study design would be  
 248 classified as descriptive research), and, therefore, valued studies with different objectives  
 249 equally. Tomlin & Borgetto's model consists of four dimensions, including descriptive  
 250 research, experimental research, outcome research, and qualitative research. Each of these  
 251 dimensions contains four subclasses to show the level of evidence within each class, where  
 252 level 1 is the highest level of evidence and level 4 the lowest. The assignment of these levels  
 253 to the different study designs are based on the degree of internal validity/authenticity and  
 254 external validity/transferability, where level 1 is regarded with the highest level of these two  
 255 measures and level 4 ranks the lowest. Table 3 shows the different research dimensions that  
 256 correspond with the included study designs and level of evidence.

**Table 3 | Level of evidence for each study design**

| Research design†                                              | Level of evidence | Abbreviation |
|---------------------------------------------------------------|-------------------|--------------|
| <b>Descriptive research</b>                                   |                   |              |
| Systematic review of descriptive studies                      | 1                 | Des-1        |
| Prevalence study with analytical component                    | 2                 | Des-2        |
| Case series and prevalence study without analytical component | 3                 | Des-3        |
| Case report                                                   | 4                 | Des-4        |
| <b>Experimental research</b>                                  |                   |              |
| Systematic review/meta-analysis of experimental studies       | 1                 | Exp-1        |
| Randomised controlled trial                                   | 2                 | Exp-2        |

## Materials and Methods

|                                                          |   |        |
|----------------------------------------------------------|---|--------|
| Group quasi-experimental study (a.k.a. non-RCT)          | 3 | Exp-3  |
| Quasi-experimental study with single subject             | 4 | Exp-4  |
| <b>Observational research</b>                            |   |        |
| Systematic review/meta-analysis of observational studies | 1 | Obs-1  |
| Cohort study                                             | 2 | Obs-2  |
| Case-control                                             | 3 | Obs-3  |
| Analytical cross-sectional study                         | 4 | Obs-4  |
| <b>Qualitative research</b>                              |   |        |
| Systematic review/meta-synthesis of qualitative studies  | 1 | Qual-1 |
| Group qualitative studies with more rigor*               | 2 | Qual-2 |
| Group qualitative studies with less rigor                | 3 | Qual-3 |
| Qualitative study with a single informant                | 4 | Qual-4 |

1 = Highest level of evidence; 4 = lowest level of evidence.

\*Rigor was subjectively assessed and based on the number of included participants, amount of collected data, and detailed explanation how the study was conducted.

†The following terminology of Tomlin & Borgetto's model have been modified to align with the included research designs in this study: association/correlation studies = prevalence studies with analytical component; normative/descriptive studies = prevalence studies without analytical component; individual case studies = case report; controlled-clinical trials = group quasi-experimental study; single-subject studies = quasi-experimental study with single subject; pre-existing groups comparisons with covariate analysis = cohort study; one-group pre-post studies = analytical cross-sectional study.

After incorporating feedback on the questions used to identify the research design and multiple testing rounds to assess if the questions were specific enough to distinguish these designs within the full set of articles, the final version of the decision tree – as seen in Figure 2 – was used to extract the data.

### Quality appraisal and level of evidence assessment

The quality assessment of the included studies was conducted by one reviewer (AWS) based on the Joanna Briggs Institute (JBI) critical appraisal tools, as this toolkit includes checklists for a wide variety of study designs that are most in line with the research designs included in this study. Additional objective criteria specific to migrant health studies were developed for each question of the JBI checklists to increase the reliability of the quality assessment. An example is provided in Table 4.

## Materials and Methods

**Table 4 | Example of additional objective criteria for the JBI toolkit**

|                               |                                                                                                                                                                                                                                                                                                                                                                                                                                                                                                                                                                                                                                                                                             |
|-------------------------------|---------------------------------------------------------------------------------------------------------------------------------------------------------------------------------------------------------------------------------------------------------------------------------------------------------------------------------------------------------------------------------------------------------------------------------------------------------------------------------------------------------------------------------------------------------------------------------------------------------------------------------------------------------------------------------------------|
| Question                      | “Were the study subjects and the setting described in detail?” <sup>30(p. 3)</sup>                                                                                                                                                                                                                                                                                                                                                                                                                                                                                                                                                                                                          |
| Original explanation          | “The study sample should be described in sufficient detail so that other researchers can determine if it is comparable to the population of interest to them. The authors should provide a clear description of the population from which the study participants were selected or recruited, including demographics, location, and time period.” <sup>30(p. 4)</sup>                                                                                                                                                                                                                                                                                                                        |
| Additional objective criteria | <p>‘Yes’ should be selected if different demographic variables are presented in absolute numbers, including age (aggregated in individual years or age categories), sex, and nationality. In addition, the setting should be described by providing the name of the location and/or a description of the location.</p> <p>‘No/unclear’ should be selected if a description regarding age, sex, and/or nationality in absolute numbers are lacking. Note that using only means and ratios will not be sufficient to answer this question, and ‘no/unclear’ should be selected. In addition, ‘no/unclear’ should be selected if the name and/or description of the location is not given.</p> |

278

279 After discussing the additional criteria and piloting the tools, slight modifications were made

280 for the JBI tools, and these final versions were used to assess the quality of the papers. The

281 modified checklists can be accessed on request from the first author.

282 Questions were answered with ‘Yes (V)’ if the study met the criteria according to

283 descriptions provided in the final version of the JBI toolkit. ‘No/Unclear (X)’ was selected if

284 the study did not address the question or if information to assess the given criteria was

285 lacking. The score concerning the quality of the study was determined by summing up all

286 ‘Yes’ answers and dividing this number by the total number of answered questions, which

287 differed by study design in the JBI tools. Questions that were answered with ‘Not applicable

288 (N/A)’ were excluded from the calculation. As the JBI toolkit has no standard scoring index,

289 the following scoring system was applied: 1) low quality = 0% to 50%; 2) moderate quality =

290 above 50% and below 75%; 3) high quality = 75% or higher. Although a four-band scoring

291 system – where each category would include a 25% scoring range – was considered, a three-

292 band scoring system was selected because the three given categories – low, moderate, and

293 high – would simplify the interpretation concerning the quality of the study. In a four-band

294 system, the distinction and classification of the two middle categories are less straightforward

## Materials and Methods

1  
2  
3 295 compared to the three-band scoring system. Further, the first two categories in a four-band  
4  
5 296 scoring system would still represent a poor-quality study, and, hence, should be used to signal  
6  
7  
8 297 more cautious interpretation of the study results among readers. The cut-off score was based  
9  
10 298 on the idea that if a study could answer 'yes' to only half or less of the questions, it would not  
11  
12 299 be sufficient to transmit a reliable message to the audience. Therefore, at least more than half  
13  
14 300 of the questions should be answered with 'yes' to obtain a moderate score. The 75% cut-off  
15  
16 301 was still based on the idea of having four equal scoring categories, where 75% and above  
17  
18 302 would be classified as a high-quality study and would inform the audience with a more  
19  
20  
21 303 credible message.

**304 Data analysis**

26  
27 305 Data concerning the type of migrant, health dimension, health subdimension, research design,  
28  
29 306 level of evidence, and quality assessment score were imported into Microsoft Excel for Mac  
30  
31 307 (version 16.28). Mean quality scores were calculated for the different variables by using  
32  
33 308 Microsoft Excel, including the type of migrant, health dimension, health subdimension,  
34  
35 309 research design, and level of evidence. RStudio (version 1.0.136; Macintosh; Intel Mac OS X  
36  
37 310 10\_15) was utilised to conduct chi-square tests and a multiple-correspondence analysis  
38  
39 311 (MCA). An MCA is a descriptive technique that can be utilised to visually demonstrate  
40  
41 312 relationships among the levels of several categorical variables – here, these include the type  
42  
43 313 of migrant, main health dimension, quality of the study, and research design – in a two-  
44  
45 314 dimensional space. The MCA projects categories in a two-dimensional space with axes  
46  
47 315 defined by latent dimensions (and, therefore, it is not possible to label the axes), based on  
48  
49 316 weighted Euclidean distances.<sup>31</sup> The MCA allows categories with similar profiles to be  
50  
51 317 grouped together, where a closer distance of categories within the same quadrant  
52  
53 318 demonstrates a stronger relationship, whereas categories that are further apart and in opposite  
54  
55 319 quadrants present weaker associations.<sup>32</sup> In addition to the MCA, chi-square tests were

## Materials and Methods

1  
2  
3 320 conducted to assess whether categorical variables were independent (e.g., not associated). It  
4  
5 321 should be noted that a few studies included two BARHII dimensions, yet, the analysis only  
6  
7 322 allowed one dimension to be included. Therefore, only the most prominent dimension, based  
8  
9 323 on the amount of attention given to the specific dimension in the article, was selected and  
10  
11 324 used for the analysis.  
12  
13  
14  
15  
16  
17  
18  
19  
20  
21  
22  
23  
24  
25  
26  
27  
28  
29  
30  
31  
32  
33  
34  
35  
36  
37  
38  
39  
40  
41  
42  
43  
44  
45  
46  
47  
48  
49  
50  
51  
52  
53  
54  
55  
56  
57  
58  
59  
60

For peer review only

## Results

**Results**

The study selection process is presented in Figure 3. After removing the duplicates, 1,282 original records were identified. A total of 1,136 papers were excluded after the title and abstract screening stage due to focusing on another population of interest, lacking focus on a BARHII health dimension, not being a peer-reviewed academic article, and including data before 1965. As a result, 146 articles were eligible for the full-text screening stage. Subsequently, full-text articles were retrieved from these 146 records, and eventually, 67 papers met the inclusion criteria and were included in this review.

[INSERT FIGURE 3]

**Characteristics of included papers**

This section first demonstrates the findings of each BARHII dimension, followed by the results on the quality and level of evidence of the included studies. Lastly, existing relationships between the type of study design, study quality of the study, type of migrant, and main health dimension are shown. Table 5 presents a descriptive summary of all included articles, including the study design and corresponding level of evidence, study period, type of migrant, sample population, main health dimension, health subdimension, quality assessment score and a short description of the study.

## Results

1  
2  
3  
4  
5  
6  
7  
8  
9  
10  
11  
12  
13  
14  
15  
16  
17  
18  
19  
20  
21  
22  
23  
24  
25  
26  
27  
28  
29  
30  
31  
32  
33  
34  
35  
36  
37  
38  
39  
40  
41  
42  
43  
44  
45  
46

| Reference                    | Study design                       | Study period        | Type of migrant                    | Sample population                                                            | Main category                              | Subcategory                                                                            | Quality score   | Summary                                                                                                                                                                                                                                                                                                                                                                              |
|------------------------------|------------------------------------|---------------------|------------------------------------|------------------------------------------------------------------------------|--------------------------------------------|----------------------------------------------------------------------------------------|-----------------|--------------------------------------------------------------------------------------------------------------------------------------------------------------------------------------------------------------------------------------------------------------------------------------------------------------------------------------------------------------------------------------|
| Scheutz et al <sup>33</sup>  | Prevalence (Des-3)                 | January to May 1982 | Asylum seekers & refugees          | 361 Vietnamese refugees                                                      | Disease & injury                           | Non-communicable disease (Oral health)                                                 | Moderate (55.6) | Dental health of refugees was examined, and the study showed a positive relationship between the average number of tooth decay and missing teeth and increase in age among younger refugees.                                                                                                                                                                                         |
| Levy <sup>34</sup>           | Prevalence (Des-2)                 | July to August 1984 | Asylum seekers & refugees          | 297 children (94 Filipino, 104 Muruts, 99 Kadazan)                           | Disease & injury                           | Communicable disease (Parasite)                                                        | Low (44.4)      | Three groups of children – one refugee group and two indigenous groups – were examined for six types of intestinal parasites. Among the three groups, Filipino refugee children presented significant higher rates of <i>Trichuris trichiura</i> and <i>ascaris lumbricoides</i> compared to both groups.                                                                            |
| Kassim et al <sup>35</sup>   | Case series (Des-3)                | 1985 to 1986        | Unclassified migrants <sup>1</sup> | 86 children (7 migrants, <sup>2</sup> 34 Malays, 16 Chinese, 3 mixed origin) | Risk behaviour                             | Violence & abuse (Neglect)                                                             | Moderate (60.0) | In total, 86 children were identified as cases suffering from different types of abuse. Among this group were 7 irregular migrant children, where they were identified as neglected, due to lacking nutritional and physical needs.                                                                                                                                                  |
| Zulkifli et al <sup>36</sup> | Analytical cross-sectional (Obs-4) | N/A <sup>2</sup>    | Unclassified migrants              | 1,515 people (336 migrants, <sup>2</sup> 1,075 citizens)                     | Living conditions<br>Mortality & morbidity | Service environment (Healthcare utilisation)<br>Mortality rates (Under-five mortality) | Low (33.3)      | A comparison between migrants and locals regarding maternal and child health outcomes were studied. Migrant women had a lower usage of contraceptives and antenatal care, but used the services of traditional birth attendants more compared to local women. In addition, migrant women had statistically significantly higher rates regarding infant mortality compared to locals. |

## Results

|                               |                     |                             |                                      |                                                                                         |                  |                                       |             |                                                                                                                                                                                                                                                                                                                                                                                                           |
|-------------------------------|---------------------|-----------------------------|--------------------------------------|-----------------------------------------------------------------------------------------|------------------|---------------------------------------|-------------|-----------------------------------------------------------------------------------------------------------------------------------------------------------------------------------------------------------------------------------------------------------------------------------------------------------------------------------------------------------------------------------------------------------|
| Rajeswari et al <sup>37</sup> | Prevalence (Des-3)  | N/A <sup>2</sup>            | Foreign workers <sup>3</sup>         | 456 children (10 Indonesians, 357 Malays, 78 Orang Asli, 11 Indian)                     | Disease & injury | Communicable disease (Parasite)       | Low (22.2)  | School children were examined for different types of helminths and protozoa, and the study showed that children from migrant workers had the highest prevalence.                                                                                                                                                                                                                                          |
| Jeyakumar <sup>38</sup>       | Case series (Des-3) | 10 May 1993 to 08 July 1993 | Unclassified migrants <sup>1,4</sup> | 27 migrants (23 Bangladeshi, 4 Indonesians)                                             | Risk behaviour   | Poor nutrition (Nutrition deficiency) | Low (40.0)  | Twenty-seven detained irregular migrants were sent to the hospital to treat ankle oedema, where they showed a positive response to thiamine treatment.                                                                                                                                                                                                                                                    |
| Jamaiah et al <sup>39</sup>   | Case series (Des-3) | 1983 to 1992                | Unclassified migrants <sup>1</sup>   | 134 people (22 Indonesian, 22 Others, <sup>2,5</sup> 40 Chinese, 37 Malays, 13 Indians) | Disease & injury | Communicable disease (Parasite)       | Low (40.0)  | A total of 134 malaria cases were admitted to University Hospital Kuala Lumpur between 1983 and 1992, including 22 irregular Indonesian migrants (16.4%) and 22 (16.4%) other foreigners (such as other irregular migrants from Bangladesh, India, and Thailand, as well as Vietnamese refugees. In addition, chloroquine-resistance was found in 9 irregular Indonesian migrants and 6 other foreigners. |
| Krahl & Hashim <sup>40</sup>  | Prevalence (Des-3)  | January 1994 to June 1996   | Foreign workers <sup>6,7</sup>       | 39 people (20 Indonesians, 16 Filipinos, 1 Bruneian, 1 Singaporean, 1 Thai)             | Disease & Injury | Mental health (Psychiatric disorders) | High (77.8) | Within a two-year period, 39 foreigners were admitted to the psychiatric wards of UHKL., including 30 migrant workers that suffered from a psychiatric disorder. Domestic workers represented with 23 cases the largest group among these foreign workers.                                                                                                                                                |
| Zabedah et al <sup>41</sup>   | Prevalence (Des-2)  | N/A <sup>2</sup>            | Unclassified migrants                | 37 people identified; 27 people included (17 Filipinos, 10 locals)                      | Risk behaviour   | Alcohol & other drugs (Inhalant)      | Low (22.2)  | Among the 37 suspected solvent abusers (glue sniffers) that were admitted to Bukit Padang Psychiatric Hospital, 27 children admitted using                                                                                                                                                                                                                                                                |



Results

|                                 |                     |                               |                       |                                                             |                       |                                          |                 |                                                                                                                                                                                                                                                                                                                                                                                                                                     |
|---------------------------------|---------------------|-------------------------------|-----------------------|-------------------------------------------------------------|-----------------------|------------------------------------------|-----------------|-------------------------------------------------------------------------------------------------------------------------------------------------------------------------------------------------------------------------------------------------------------------------------------------------------------------------------------------------------------------------------------------------------------------------------------|
|                                 |                     |                               |                       |                                                             |                       |                                          |                 | these inhalants. Almost two-third of the cases were Filipino immigrants.                                                                                                                                                                                                                                                                                                                                                            |
| Dony et al <sup>42</sup>        | Prevalence (Des-3)  | N/A <sup>2</sup>              | Unclassified migrants | 3,908 people (943 foreigners, <sup>2</sup> 2,965 nationals) | Mortality & Morbidity | Morbidity rates (Tuberculosis & leprosy) | Moderate (62.5) | An epidemiological study aimed to present the tuberculosis and leprosy trends in Sabah. Since 1990, at least 24% of the annual tuberculosis cases were among Indonesian and Filipino migrants, where the annual rate differed between 100 to 200 cases per 100,000 population between 1990 and 2000. Furthermore, leprosy rates among migrants differed from 4.39 cases to 6.19 cases per 100,000 population between 1996 and 2001. |
| Chandran et al <sup>43</sup>    | Case report (Des-4) | N/A <sup>2</sup>              | Foreign workers       | 1 Myanmar                                                   | Disease & injury      | Communicable disease (Parasite)          | High (83.3)     | A Jabouley procedure was carried out to treat a 30-year-old Myanmar worker that suffered from a filarial infection. After the procedure, the patient was discharged, but did not show for the follow-up.                                                                                                                                                                                                                            |
| Nissapatorn et al <sup>44</sup> | Prevalence (Des-3)  | January 2000 to April 2004    | Foreign workers       | 1,885 patients <sup>2</sup>                                 | Disease & injury      | Communicable disease (Parasite)          | Low (50.0)      | Within a four-year period, 1,885 medical records of the University of Malaya Medical Centre were reviewed to identify the prevalence of four common protozoan infections. In total, 28 malaria cases were identified, where 60.7% was among foreigners. The majority of this group consisted of foreign workers.                                                                                                                    |
| Sobri et al <sup>45</sup>       | Case series (Des-3) | January 1995 to December 2001 | Unclassified migrants | 42 people (7 Indonesians, 1 Burmese, 1 Siamese (Thai), 1    | Disease & injury      | Communicable disease (Bacteria)          | Low (50.0)      | In total, 42 patients were diagnosed with tuberculosis meningitis at the Kuala Lumpur Hospital during a 7-year period. Eleven (9.5%)                                                                                                                                                                                                                                                                                                |

## Results

|                                       |                        |                                             |                 |                                                                                         |                     |                                        |                |                                                                                                                                                                                                                                                                                                         |
|---------------------------------------|------------------------|---------------------------------------------|-----------------|-----------------------------------------------------------------------------------------|---------------------|----------------------------------------|----------------|---------------------------------------------------------------------------------------------------------------------------------------------------------------------------------------------------------------------------------------------------------------------------------------------------------|
|                                       |                        |                                             |                 | <i>Bangladeshi, 1<br/>Nepalese, 23<br/>Malays, 6 Chinese,<br/>2 Indians)</i>            |                     |                                        |                | out of the 42 tuberculosis meningitis patients were among immigrants.                                                                                                                                                                                                                                   |
| Leong <sup>46</sup>                   | Prevalence<br>(Des-3)  | 1 January<br>1997 to 31<br>December<br>2004 | Foreign workers | <i>3,117 Indonesians</i>                                                                | Disease &<br>injury | Various diseases<br>(various diseases) | Low<br>(44.4)  | During an 8-year-period, 3,117 female migrant (domestic) workers were screened at a private clinic in Johor Bahru, where 223 (7.2%) of them presented medical problems. Hypertension, pulmonary tuberculosis and hepatitis B were the top three major issues.                                           |
| Sasidharan et al <sup>47</sup>        | Prevalence<br>(Des-2)  | June 1999<br>to<br>September<br>2001        | Foreign workers | 697 people<br><i>(26 Bangladeshi,<br/>276 Malays, 229<br/>Chinese, 166<br/>Indians)</i> | Disease &<br>injury | Communicable<br>disease<br>(Bacteria)  | High<br>(77.8) | From 1999 to 2002, a total of 697 patients were examined for Helicobacter pylori infection. Twenty-six Bangladeshi foreign workers were among this group, and the infection was present in 6 of them.                                                                                                   |
| Masitah et al <sup>48</sup>           | Case series<br>(Des-3) | N/A <sup>2</sup>                            | Foreign workers | N/A <sup>2</sup>                                                                        | Disease &<br>injury | Communicable<br>disease<br>(Parasite)  | Low<br>(22.2)  | During a 6-year period, different malaria registries were reviewed to identify the number of cases in Selangor. The number of annual malaria cases decreased from 172 people in 2001 to 90 people in 2006, while the proportion of cases among migrant workers increased from 57% to 75%, respectively. |
| Shailendra & Prepageran <sup>49</sup> | Case report<br>(Des-4) | N/A <sup>2</sup>                            | Foreign workers | <i>1 Myanmar</i>                                                                        | Disease &<br>injury | Communicable<br>disease<br>(Parasite)  | High<br>(75.0) | A 38-year-old Myanmar migrant worker presented a case of oropharyngeal rhinosporidiosis. The abnormal growths were removed, and the patient did not show any recurrence of the disease after a 3-month follow-up.                                                                                       |

Results

|                             |                                    |                  |                              |                                                                                                                                                                            |                  |                                 |            |                                                                                                                                                                                                                                                                                                                                                                                                                 |    |    |    |    |    |    |    |    |    |    |    |    |    |    |    |    |    |    |    |    |    |    |    |    |    |    |    |    |    |    |    |    |    |    |    |    |    |
|-----------------------------|------------------------------------|------------------|------------------------------|----------------------------------------------------------------------------------------------------------------------------------------------------------------------------|------------------|---------------------------------|------------|-----------------------------------------------------------------------------------------------------------------------------------------------------------------------------------------------------------------------------------------------------------------------------------------------------------------------------------------------------------------------------------------------------------------|----|----|----|----|----|----|----|----|----|----|----|----|----|----|----|----|----|----|----|----|----|----|----|----|----|----|----|----|----|----|----|----|----|----|----|----|----|
| 1                           | 2                                  | 3                | 4                            | 5                                                                                                                                                                          | 6                | 7                               | 8          | 9                                                                                                                                                                                                                                                                                                                                                                                                               | 10 | 11 | 12 | 13 | 14 | 15 | 16 | 17 | 18 | 19 | 20 | 21 | 22 | 23 | 24 | 25 | 26 | 27 | 28 | 29 | 30 | 31 | 32 | 33 | 34 | 35 | 36 | 37 | 38 | 39 | 40 | 41 | 42 | 43 | 44 | 45 | 46 |
| Chan et al <sup>50</sup>    | Analytical cross-sectional (Obs-4) | N/A <sup>2</sup> | Foreign workers <sup>1</sup> | 699 people (336 Indonesians, 45 Bangladeshi, 45 Indians, 26 Nepalese, 22 Myanmar, 17 Pakistani, 3 Africans, <sup>2</sup> 3 Sri Lankans, 3 Thai, 1 Chinese, 198 Malaysians) | Disease & injury | Communicable disease (Parasite) | Low (0.0)  | A sample of 699 people were screened for toxoplasmosis, including 501 migrant workers. Among the migrant workers, 171 (34.1%) cases tested positive for the IgG antibodies test and 26 (5.2%) cases tested positive for the IgM antibodies test. The statistical analysis showed that the infection rate – using the IgG test – was significantly higher among local residents compared to the foreign workers. |    |    |    |    |    |    |    |    |    |    |    |    |    |    |    |    |    |    |    |    |    |    |    |    |    |    |    |    |    |    |    |    |    |    |    |    |    |
| Farhana et al <sup>51</sup> | Case series (Des-3)                | 1999 to 2008     | Foreign workers              | 34 people (3 Myanmar, 1 Indonesian, 1 Pakistani, 14 Chinese, 9 Malays, 6 Indians)                                                                                          | Disease & injury | Communicable disease (Parasite) | Low (60.0) | A total of 34 amoebiasis cases were admitted to University Malaya Medical Centre during a 10-year-period, including five foreign workers.                                                                                                                                                                                                                                                                       |    |    |    |    |    |    |    |    |    |    |    |    |    |    |    |    |    |    |    |    |    |    |    |    |    |    |    |    |    |    |    |    |    |    |    |    |    |
| Chan et al <sup>52</sup>    | Analytical cross-sectional (Obs-4) | N/A <sup>2</sup> | Foreign workers <sup>1</sup> | 699 people (336 Indonesians, 45 Bangladeshi, 45 Indians, 26 Nepalese, 22 Myanmar, 17 Pakistani, 3 Africans, <sup>2</sup> 3 Sri Lankans, 3 Thai,                            | Disease & injury | Communicable disease (Parasite) | Low (0.0)  | A sample of 699 people were screened for toxoplasmosis, including 501 migrant workers. Among the migrant workers, 171 (34.1%) cases tested positive for the IgG antibodies test and 26 (5.2%) cases tested positive for the IgM antibodies test. The statistical analysis showed that the infection rate – using the IgG test – was significantly higher among local residents compared to the foreign workers. |    |    |    |    |    |    |    |    |    |    |    |    |    |    |    |    |    |    |    |    |    |    |    |    |    |    |    |    |    |    |    |    |    |    |    |    |    |

## Results

|                             |                                              |                                       |                 |                                                                                                                                        |                     |                                         |                    |                                                                                                                                                                                                                                                                                                                                                                                                               |
|-----------------------------|----------------------------------------------|---------------------------------------|-----------------|----------------------------------------------------------------------------------------------------------------------------------------|---------------------|-----------------------------------------|--------------------|---------------------------------------------------------------------------------------------------------------------------------------------------------------------------------------------------------------------------------------------------------------------------------------------------------------------------------------------------------------------------------------------------------------|
|                             |                                              |                                       |                 | 1 Chinese, 198<br>Malaysians)                                                                                                          |                     |                                         |                    |                                                                                                                                                                                                                                                                                                                                                                                                               |
| Murty <sup>53</sup>         | Case report<br>(Des-4)                       | N/A <sup>2</sup>                      | Foreign workers | 1 Myanmar                                                                                                                              | Disease &<br>injury | Non-communicable<br>disease<br>(Benign) | High<br>(80.0)     | A 37-year-old foreign worker was found dead, and the post-mortem examination showed that the case suffered from a cystic tumour in the heart.                                                                                                                                                                                                                                                                 |
| Murty et al <sup>54</sup>   | Case series<br>(Des-3)                       | 1996 to<br>2005                       | Foreign workers | 27 people<br>(16 Indonesians, 1<br>Bangladeshi, 1<br>Punjabi, <sup>2</sup> 1 Bajau, <sup>2</sup><br>5 Malays, 2 Indians,<br>1 Chinese) | Disease &<br>injury | Injury<br>(Physical trauma)             | Low<br>(44.4)      | During a 10-year study period, 27 cases of fatal lightning strikes were identified. The majority of the cases were among foreign workers, where Indonesians had with 16 people (59.3%) the highest prevalence.                                                                                                                                                                                                |
| Mustafa et al <sup>55</sup> | Prevalence<br>(Des-2)                        | August<br>2006 to<br>March 2009       | Foreign workers | 558 patients<br>(34 foreign labour, <sup>2</sup><br>347 Malays, 97<br>Indians, 80<br>Chinese)                                          | Disease &<br>injury | Communicable<br>disease<br>(Virus)      | Low<br>(44.4)      | A total of 558 suspected dengue cases were identified, including 34 migrant workers. Among the foreign labour group, 20 patients presented acute dengue, 4 patients presented recent dengue, and 10 patients tested negative for dengue.                                                                                                                                                                      |
| Su et al <sup>56</sup>      | Analytical<br>cross-<br>sectional<br>(Obs-4) | 3 January<br>2007 to 24<br>April 2007 | Foreign workers | 194 people <sup>8</sup><br>(95% Indonesians,<br>5% Bangladeshi)                                                                        | Disease &<br>injury | Injury<br>(Physical syndrome)           | Moderate<br>(57.1) | During a 4-month cross-sectional study, 234 migrant workers were examined for level of occupational vibration exposure and health outcomes. In total, 18% of the migrant workers suffered from hand-arm vibration syndrome (HAVS). In addition, different HAVS-related symptoms were significantly higher among workers with high levels of exposure compared to migrant workers with low levels of exposure. |

## Results

|                                    |                        |                                        |                          |                                                                                                               |                     |                                       |                |                                                                                                                                                                                                                                                                                                                                                                                               |
|------------------------------------|------------------------|----------------------------------------|--------------------------|---------------------------------------------------------------------------------------------------------------|---------------------|---------------------------------------|----------------|-----------------------------------------------------------------------------------------------------------------------------------------------------------------------------------------------------------------------------------------------------------------------------------------------------------------------------------------------------------------------------------------------|
| Daher et al <sup>57</sup>          | Prevalence<br>(Des-2)  | September<br>2009 to<br>April 2010     | Unclassified<br>migrants | 253 Iraqi                                                                                                     | Disease &<br>injury | Mental health<br>(Quality of life)    | High<br>(75.0) | Health-related quality of life of 253 Iraqi migrants was examined, showing that their quality of life was moderate and statically significant higher levels were found among males and married people.                                                                                                                                                                                        |
| Ratnasingam et al <sup>58</sup>    | Prevalence<br>(Des-2)  | January<br>2010 to<br>November<br>2010 | Foreign workers          | 5,340 people<br>(1,348 Bangladeshi,<br>843 Myanmar, 743<br>Nepalese, 217<br>Indonesians, 2,190<br>Malaysians) | Disease &<br>injury | Injury<br>(Physical trauma)           | Low<br>(11.1)  | A total of 5,340 workers in the furniture industry were examined, where 59% of this population was foreign labour. Compared to local workers, migrant workers had less occupational accidents and a more positive work-oriented mentality.                                                                                                                                                    |
| Ab Rahman & Abdullah <sup>59</sup> | Case report<br>(Des-4) | N/A <sup>2</sup>                       | Foreign workers          | 1 Nepalese                                                                                                    | Disease &<br>injury | Communicable<br>disease<br>(Parasite) | High<br>(87.5) | A 24-year-old Nepalese migrant worker presented a long medical history of different symptoms, including fever, abdominal pain, and poor appetite. Clinical examination showed that the patient suffered from a visceral leishmaniasis and malaria co-infection, and he was treated with chloroquine and amphotericin B. A follow-up was carried out after 6 months and the man remained well. |
| Taib & Baba <sup>60</sup>          | Case series<br>(Des-3) | 2006 to<br>2009                        | Foreign workers          | 75 patients<br>(38 foreigners, <sup>8</sup> 37<br>locals)                                                     | Disease &<br>injury | Communicable<br>disease<br>(Bacteria) | Low<br>(30.0)  | A total of 75 leprosy cases were detected at the Hospital Kuala Lumpur Hansen's Clinic during a 4-year period. With 38 patients, foreign workers represented more than half of the cases.                                                                                                                                                                                                     |
| Osman et al <sup>61</sup>          | Prevalence<br>(Des-3)  | June 2012<br>to<br>September<br>2012   | Unclassified<br>migrants | 108 Iraqi                                                                                                     | Risk<br>behaviour   | Sexual behaviour<br>(HPV knowledge)   | Low<br>(50.0)  | Knowledge and awareness regarding cervical cancer and pap smear tests were assessed among 108 Iraqi migrant women. In general, this population lacks understanding regarding                                                                                                                                                                                                                  |

## Results

|                                |                                    |                             |                           |                                                                   |                   |                                              |             |                                                                                                                                                                                                                                                                                                                                                       |
|--------------------------------|------------------------------------|-----------------------------|---------------------------|-------------------------------------------------------------------|-------------------|----------------------------------------------|-------------|-------------------------------------------------------------------------------------------------------------------------------------------------------------------------------------------------------------------------------------------------------------------------------------------------------------------------------------------------------|
|                                |                                    |                             |                           |                                                                   |                   |                                              |             | cervical cancer and the importance of pap smear tests.                                                                                                                                                                                                                                                                                                |
| Minhat et al <sup>62</sup>     | Prevalence (Des-2)                 | April 2010 to June 2010     | Unclassified migrants     | 271 Iranians                                                      | Risk behaviour    | Sexual behaviour (HPV knowledge)             | Low (25.0)  | The knowledge regarding HPV vaccination of 271 Iranian female migrants was evaluated and showed that the majority of the study population has poor knowledge regarding this matter. Marital status was the only predicative factor that was statistically significant, where married women were 3.6 times more likely to have good HPV knowledge.     |
| Mendelsohn et al <sup>63</sup> | Qualitative (Qual-2)               | July 2010 to September 2010 | Asylum seekers & refugees | 14 Myanmar <sup>9</sup>                                           | Living conditions | Service environment (Healthcare utilisation) | High (90.0) | Fourteen Myanmar refugees were interviewed to explore the difficulties that this group has in accessing anti-retroviral therapy (ART). Barriers to comply to ART include lack of an UNHCR identity card, fear of arrest during travelling to the hospital, corruption, financial issues, and receiving small quantities of ART medication per refill. |
| Mendelsohn et al <sup>64</sup> | Analytical cross-sectional (Obs-4) | April 2010 to July 2010     | Asylum seekers & refugees | 299 people (146 Myanmar, 5 Others, <sup>2</sup> 148 Malaysians)   | Living conditions | Service environment (Healthcare utilisation) | High (83.3) | ART compliance and virological outcomes were compared between HIV-infected refugees and locals, where the study showed that both groups had similar rates of compliance and unsuppressed viral loads.                                                                                                                                                 |
| Kwan et al <sup>65</sup>       | Case series (Des-3)                | 2008 to 2013                | Unclassified migrants     | 27 people (3 Indonesians, 2 Indians, 2 Nepalese, 2 Myanmar, 1 Sri | Disease & injury  | Communicable disease (Bacteria)              | Low (40.0)  | Between 2008 and 2013, 27 leprosy cases were identified by reviewing the Dermatology Clinic census. Out of the 27 identified leprosy cases, 37% of them were among immigrants.                                                                                                                                                                        |

Results

|                            |                         |                                  |                          |                                                                                                                                                     |                      |                                                             |                    |                                                                                                                                                                                                                                                                                                                                         |
|----------------------------|-------------------------|----------------------------------|--------------------------|-----------------------------------------------------------------------------------------------------------------------------------------------------|----------------------|-------------------------------------------------------------|--------------------|-----------------------------------------------------------------------------------------------------------------------------------------------------------------------------------------------------------------------------------------------------------------------------------------------------------------------------------------|
|                            |                         |                                  |                          | <i>Lankan, 17<br/>Malaysians)</i>                                                                                                                   |                      |                                                             |                    |                                                                                                                                                                                                                                                                                                                                         |
| Santos et al <sup>66</sup> | Prevalence<br>(Des-3)   | February<br>2013 to<br>June 2013 | Foreign workers          | <i>317 people<br/>(110 Sri Lankans,<br/>85 Indonesians, 71<br/>Indians,<sup>8</sup> 22<br/>Nepalese,<br/>20 Indians,<sup>8</sup> 9<br/>Myanmar)</i> | Disease &<br>injury  | Injury<br>(Physical syndrome)                               | Moderate<br>(55.6) | A sample of 317 migrant workers were examined to explore the prevalence of musculoskeletal pain among this group. Almost two-third (203 people) of the surveyed migrant workers suffered from work-related musculoskeletal complaints. Pain in the knee/leg/foot area was the most common, as 85 migrant workers reported this outcome. |
| Razali et al <sup>67</sup> | Case series<br>(Des-3)  | 2000 to<br>2012                  | Unclassified<br>migrants | <i>18 females<br/>(2 Indonesians, 1<br/>Myanmar, 6<br/>Malays, 5 Chinese,<br/>3 Indians, 1<br/>Punjabi)</i>                                         | Risk<br>behaviour    | Violence & abuse<br>(Murder)                                | High<br>(80.0)     | Clinical records of two forensic psychiatric institutions were reviewed during 2000 and 2012.<br><br>A total of 18 cases that committed maternal filicide were detected, including 3 immigrant women that suffered from adverse life events.                                                                                            |
| Elmi et al <sup>68</sup>   | Case control<br>(Obs-3) | January<br>2010 to<br>April 2014 | Unclassified<br>migrants | <i>209 cases<br/>(49 migrants,<sup>2</sup> 265<br/>locals)</i>                                                                                      | Disease &<br>injury  | Communicable<br>disease<br>(Bacteria)                       | Low<br>(50.0)      | A case control study was conducted to identify risk factors regarding multidrug-resistant tuberculosis (MDR-TB) development. The study showed that MDR-TB was more prevalent than non-MDR-TB among foreign patients, and that MDR-TB was significantly higher among migrants compared to locals.                                        |
| Santos et al <sup>69</sup> | Prevalence<br>(Des-2)   | March 2013<br>to April<br>2013   | Foreign workers          | <i>317 people<br/>(110 Sri Lankans,<br/>85 Indonesians, 71<br/>Indians,<sup>8</sup> 22<br/>Nepalese, 20</i>                                         | Living<br>conditions | Economic & work<br>environment<br>(Occupational<br>hazards) | Low<br>(44.4)      | The study assessed overall levels of pain and identified perceived environmental hazards among a group of foreign workers. In total, 204 out of 317 migrant workers suffered from musculoskeletal pain, and noise (37.5%) and                                                                                                           |

## Results

|                             |                                    |                            |                           |                                                                                                                    |                          |                                                |             |                                                                                                                                                                                                                                                                                                                            |
|-----------------------------|------------------------------------|----------------------------|---------------------------|--------------------------------------------------------------------------------------------------------------------|--------------------------|------------------------------------------------|-------------|----------------------------------------------------------------------------------------------------------------------------------------------------------------------------------------------------------------------------------------------------------------------------------------------------------------------------|
|                             |                                    |                            |                           | <i>Indians,<sup>8</sup> 9</i>                                                                                      | Disease & injury         | Injury (Physical syndrome)                     |             | dust (37.2%) were perceived as the main environmental hazards among this group.                                                                                                                                                                                                                                            |
| William et al <sup>70</sup> | Prevalence (Des-2)                 | 4 July 2012 to 3 July 2014 | Unclassified migrants     | 176 people ( <i>53 Filipinos, 6 Indonesians, 106 Indigenous, 10 Chinese, 1 Indian</i> )                            | Disease & injury         | Communicable disease (Bacteria & Virus)        | High (77.8) | During a 2-year study, 176 participants that tested positive for pulmonary tuberculosis at the Luyang Clinic in Kota Kinabalu were enrolled in the study. More than one-third of the patients (33.5%) were migrants. In addition, out of the three patients with a HIV co-infection, one was a migrant.                    |
| Siah et al <sup>71</sup>    | Prevalence (Des-2)                 | N/A <sup>2</sup>           | Asylum seekers & refugees | <i>89 children (39.3% Myanmar, 21.3% Somali, 22.5% Sudanese, 16.9% Others<sup>2</sup>)</i>                         | Disease & injury         | Mental health (Quality of life)                | Low (11.1)  | A total of 89 refugee children were surveyed to investigate factors that influence their quality of life. Experiencing deportation, lower levels of education and unemployment of their fathers were significantly associated with a lower quality of life.                                                                |
| Guinto et al <sup>72</sup>  | Scoping review <sup>10</sup>       | 2000 to 2014               | Foreign workers           | N/A                                                                                                                | Institutional inequities | Laws & regulations (Universal Health Coverage) | N/A         | The study presented implementation challenges of universal health coverage (UHC) in Southeast Asian countries. Malaysia implemented some measures regarding healthcare for migrant workers, however, government-run UHC is still lacking.                                                                                  |
| Vijian et al <sup>73</sup>  | Analytical cross-sectional (Obs-4) | 2010 to 2015               | Foreign workers           | 50 people ( <i>8 Bangladeshi, 6 Nepalese, 3 Myanmar, 1 African,<sup>2,11</sup> 1 Pakistani, 1 Vietnamese, 14</i> ) | Disease & injury         | Non-communicable disease (Perforation)         | Low (16.7)  | Twenty foreign workers and 30 local patients that suffered from perforated peptic ulcers were compared to each other to assess the difference in characteristics between these two groups. Several characteristics were significantly different, where foreign workers were on average 18 years younger (mean age = 30.4), |



Results

|                               |                                    |                               |                 |                                                                                                                          |                   |                                                |            |                                                                                                                                                                                                                                                                                                                                                                                       |
|-------------------------------|------------------------------------|-------------------------------|-----------------|--------------------------------------------------------------------------------------------------------------------------|-------------------|------------------------------------------------|------------|---------------------------------------------------------------------------------------------------------------------------------------------------------------------------------------------------------------------------------------------------------------------------------------------------------------------------------------------------------------------------------------|
|                               |                                    |                               |                 | Malays, 12 Chinese,<br>4 Indians)                                                                                        |                   |                                                |            | suffered from smaller-sized ulcers, and experienced lower levels of post-operative complications.                                                                                                                                                                                                                                                                                     |
| Azian et al <sup>74</sup>     | Prevalence (Des-2)                 | N/A <sup>2</sup>              | Foreign workers | 2,153 samples <sup>12</sup><br>(1,422 Bangladeshi, 349 Indians, 201 Nepalese, 78 Indonesians, 58 Vietnamese, 45 Myanmar) | Disease & injury  | Communicable disease (Parasite)                | Low (11.1) | A total of 2,153 blood samples were taken from migrant workers that were located in seven states of Peninsular Malaysia and were tested for leishmaniasis infection. More than half (55.3%) of the collected blood samples were found positive.                                                                                                                                       |
| Sahimin et al <sup>75</sup>   | Prevalence (Des-2)                 | September 2014 to August 2015 | Foreign workers | 388 people<br>(167 Indonesians, 81 Nepalese, 70 Bangladeshi, 47 Indians, 23 Myanmar)                                     | Disease & injury  | Communicable disease (Parasite)                | Low (33.3) | A cross-sectional study was conducted to examine the prevalence of different intestinal parasitic infections among foreign labour. Out of the 388 migrant workers, infection rates were between 52.1% and 84%. Higher infection rates significantly associated with migrants from Nepal and India, recently arrived in the country, and less than 1-year work experience in Malaysia. |
| Noh et al <sup>76</sup>       | Prevalence (Des-2)                 | N/A <sup>2</sup>              | Foreign workers | 600 foreign workers <sup>2</sup>                                                                                         | Living conditions | Service environment (Healthcare utilisation)   | Low (22.2) | Data of 600 foreign workers was obtained to explore their healthcare utilisation. Most of them utilise health services occasionally (88.5%) and the majority (61.4%) goes to government hospitals.                                                                                                                                                                                    |
| Kamaludin & How <sup>77</sup> | Analytical cross-sectional (Obs-4) | February 2016 to April 2016   | Foreign workers | 120 people <sup>2</sup><br>(60 foreign workers, 60 local workers)                                                        | Risk behaviour    | Hazard & safety awareness (environmental risk) | Low (50.0) | The study compared environmental health awareness between 60 local workers and 60 migrant workers, where the latter group showed significant lower levels of awareness.                                                                                                                                                                                                               |

## Results

|                                                                                                    |                            |                                |                                        |                              |                                                                                                                                                                                                  |                      |                                                       |                    |                                                                                                                                                                                                                                                                                                                                                                                                                                                                                              |
|----------------------------------------------------------------------------------------------------|----------------------------|--------------------------------|----------------------------------------|------------------------------|--------------------------------------------------------------------------------------------------------------------------------------------------------------------------------------------------|----------------------|-------------------------------------------------------|--------------------|----------------------------------------------------------------------------------------------------------------------------------------------------------------------------------------------------------------------------------------------------------------------------------------------------------------------------------------------------------------------------------------------------------------------------------------------------------------------------------------------|
| 1<br>2<br>3<br>4<br>5<br>6<br>7<br>8<br>9<br>10<br>11<br>12<br>13<br>14<br>15                      | Min et al <sup>78</sup>    | Prevalence<br>(Des-3)          | January<br>2011 to<br>December<br>2013 | Foreign workers              | 440 people<br>(46 Indonesians, 37<br>Bangladeshi, 33<br>Nepalese, 17<br>Myanmar, 11<br>Pakistani, 8<br>Others, <sup>2</sup> 226<br>Malays, 32 Chinese,<br>20 Others, <sup>2</sup> 10<br>Indians) | Disease &<br>injury  | Injury<br>(Physical trauma)                           | Moderate<br>(62.5) | Medical records of the Hospital Sultan Ismail in<br>Johor Bahru were reviewed between January<br>2011 and December 2013 to describe the<br>prevalence of work-related ocular traumas.<br>More than one-third of the ocular injuries were<br>among foreign workers and contributed to two-<br>third of the open eye traumas.                                                                                                                                                                  |
| 16<br>17<br>18<br>19<br>20<br>21<br>22<br>23<br>24<br>25<br>26<br>27<br>28<br>29                   | Woh et al <sup>79</sup>    | Prevalence<br>(Des-3)          | N/A <sup>2</sup>                       | Foreign workers              | 317 people<br>(140 Indians, 80<br>Nepalese, 36<br>Indonesians, 29<br>Bangladeshi, 18<br>Myanmar, 7<br>Pakistani, 4 Sri<br>Lankans, 2<br>Vietnamese, 1 Thai)                                      | Disease &<br>injury  | Communicable<br>disease<br>(Bacteria)                 | Low<br>(44.4)      | A cross-sectional study was conducted among<br>317 migrant food handlers from Ipoh, Kuala<br>Terengganu, and Shah Alam to assess the<br>Salmonella prevalence of this group, resulting in<br>nine (2.8%) people testing positive. Seven out of<br>these 9 cases presented multidrug resistance<br>towards trimethoprim-sulfamethoxazole (6<br>cases), streptomycin (7 cases), ampicillin (4<br>cases), chloramphenicol (4 cases),<br>sulphonamides (6 cases), and tetracycline (7<br>cases). |
| 30<br>31<br>32<br>33<br>34<br>35<br>36<br>37<br>38<br>39<br>40<br>41<br>42<br>43<br>44<br>45<br>46 | Tanabe et al <sup>80</sup> | Mixed-<br>method <sup>10</sup> | N/A <sup>2</sup>                       | Asylum seekers<br>& refugees | Participants per<br>method <sup>9</sup><br>(422 Myanmar -<br>survey; 66<br>Myanmar - focus<br>group; 6 people <sup>2</sup> -<br>interviews; 4                                                    | Living<br>conditions | Service<br>environment<br>(Healthcare<br>utilisation) | N/A                | A multiple-country study was conducted to<br>explore barriers regarding family planning<br>services among refugees, where the main<br>challenges included lack of understanding and<br>misinformation concerning contraceptives,<br>language barriers, financial issues, detention                                                                                                                                                                                                           |

Results

|                                 |                                                  |                  |                 |                                                                                                                                 |                  |                                         |             |                                                                                                                                                                                                                                                                                                                                                                                                                                                                                                                                             |
|---------------------------------|--------------------------------------------------|------------------|-----------------|---------------------------------------------------------------------------------------------------------------------------------|------------------|-----------------------------------------|-------------|---------------------------------------------------------------------------------------------------------------------------------------------------------------------------------------------------------------------------------------------------------------------------------------------------------------------------------------------------------------------------------------------------------------------------------------------------------------------------------------------------------------------------------------------|
|                                 |                                                  |                  |                 | facility assessments)                                                                                                           |                  |                                         |             | concerns, and distance of service delivery points.                                                                                                                                                                                                                                                                                                                                                                                                                                                                                          |
| Ratnalingam et al <sup>81</sup> | Prevalence (Des-2)                               | N/A <sup>2</sup> | Foreign workers | 207 patients <sup>2</sup>                                                                                                       | Disease & injury | Communicable disease (Bacteria)         | Low (33.3)  | A total of 207 patients from four different hospitals in Malaysia were enrolled in the study to describe the characteristics and risk factors of microbial keratitis. More than one-fourth of the cases were due to work-related traumas, where 34.2% of these cases were among male migrant workers.                                                                                                                                                                                                                                       |
| Woh et al <sup>82</sup>         | Prevalence (Des-2)                               | N/A <sup>2</sup> | Foreign workers | 383 swab samples <sup>12</sup> (Indians, Nepalese, Indonesians, Bangladeshi, Myanmar, Pakistani, Sri Lankans, Thai, Vietnamese) | Risk behaviour   | Hygiene & sanitation (Food preparation) | Low (22.2)  | A total of 383 hand swabs were obtained from migrant food handlers to investigate the prevalence of aerobic plate counts (APC), Staphylococcus aureus, and Escherichia coli, resulting in 99.5%, 64.4%, and 20.8% testing positive, respectively. In general, levels of the first two exceeded the acceptable standard. Infection rates were significantly higher among food handles from India compared food handlers from Nepal. In addition, significant higher rates were found among cooks, followed by waiters, compared to managers. |
| Noor & Shaker <sup>83</sup>     | Analytical cross-sectional (Obs-4) <sup>13</sup> | N/A <sup>2</sup> | Foreign workers | 119 Indonesians                                                                                                                 | Disease & injury | Mental health (Stress)                  | High (85.7) | A sample of 119 migrant workers were examined to explore the relationship between psychological distress and workplace discrimination, and the effect of coping strategy on stress levels. The study showed that workplace discrimination increased levels of stress. In addition, problem-oriented coping                                                                                                                                                                                                                                  |

## Results

|                             |                             |                               |                           |                                                                                                          |                  |                                 |                 |                                                                                                                                                                                                                                                                                                                                                            |
|-----------------------------|-----------------------------|-------------------------------|---------------------------|----------------------------------------------------------------------------------------------------------|------------------|---------------------------------|-----------------|------------------------------------------------------------------------------------------------------------------------------------------------------------------------------------------------------------------------------------------------------------------------------------------------------------------------------------------------------------|
|                             |                             |                               |                           |                                                                                                          |                  |                                 |                 | strategies were related to lower stress levels, while the emotional and avoidance coping strategy was associated to higher levels of stress.                                                                                                                                                                                                               |
| Noordin et al <sup>84</sup> | Prevalence (Des-3)          | September 2014 to August 2015 | Foreign workers           | 484 foreign labour (246 Indonesians, 103 Nepalese, 69 Bangladeshi, 51 Indians, 14 Myanmar, 1 Vietnamese) | Disease & injury | Communicable disease (Parasite) | Low (33.3)      | Lymphatic filariasis prevalence among foreign labour was determined by screening 484 migrant workers, showing that 6.8% and 2.1% suffered from bancroftian filariasis and brugian filariasis, respectively.                                                                                                                                                |
| Sahimin et al <sup>85</sup> | Prevalence (Des-2)          | September 2014 to August 2015 | Foreign workers           | 484 people (247 Indonesians, 99 Nepalese, 72 Bangladeshi, 52 Indians, 14 Myanmar)                        | Disease & injury | Communicable disease (Parasite) | Low (44.4)      | A total of 484 foreign workers were sampled to describe the prevalence of Toxoplasma gondii and factors related to higher infection rates. In total, 278 migrant workers (57.4%) tested positive for T gondii, where significant higher levels of infection were associated with Nepalese origin, newly arrived in Malaysia, and working in manufacturing. |
| Labao et al <sup>86</sup>   | Prevalence (Des-3)          | N/A <sup>2</sup>              | Foreign workers           | 60 Filipinos                                                                                             | Disease & injury | Injury (Physical syndrome)      | Moderate (55.6) | A cross-sectional study was conducted to investigate which body regions were presenting the most work-related musculoskeletal complaints among migrant workers. The major affected areas included the shoulder (60%), lower back (60%), upper back (48.3%), and neck (45%) regions.                                                                        |
| Shaw et al <sup>87</sup>    | Randomised controlled trial | N/A <sup>2</sup>              | Asylum seekers & refugees | 39 Afghans                                                                                               | Disease & injury | Mental health (Stress)          | Low (30.8)      | In order to assess the impact of cognitive behavioural therapy (CBT) on emotional distress, an 8-week intervention was conducted                                                                                                                                                                                                                           |

Results

|                               |                      |                               |                                    |                                                                                   |                  |                                       |                 |  |                                                                                                                                                                                                                                                                                                                                                                                                                                                                                                              |
|-------------------------------|----------------------|-------------------------------|------------------------------------|-----------------------------------------------------------------------------------|------------------|---------------------------------------|-----------------|--|--------------------------------------------------------------------------------------------------------------------------------------------------------------------------------------------------------------------------------------------------------------------------------------------------------------------------------------------------------------------------------------------------------------------------------------------------------------------------------------------------------------|
|                               | (Exp-2)              |                               |                                    |                                                                                   |                  |                                       |                 |  | among 39 female refugees. As a result, the intervention significantly lowered levels of posttraumatic stress, anxiety, emotional distress, and depression.                                                                                                                                                                                                                                                                                                                                                   |
| Rahman et al <sup>88</sup>    | Case control (Obs-3) | N/A <sup>2</sup>              | Unclassified migrants <sup>4</sup> | 61 people (52 Myanmar, 9 Others <sup>2</sup> )                                    | Risk behaviour   | Poor nutrition (Nutrition deficiency) | Moderate (60.0) |  | A case control study was conducted to determine the factors that were related to bilateral leg swelling among detained irregular migrants. Out of the 226 inmates, 21 Myanmar were identified as cases and were compared to 41 controls from Myanmar, Indonesia, Nepal, and Vietnam. The study showed that the illness was caused due to a thiamine deficiency, as the patients lacked the consumption of meat. Intravenous and oral thiamine treatment was provided, and the patients responded well to it. |
| Sahimin et al <sup>89</sup>   | Prevalence (Des-2)   | September 2014 to August 2015 | Foreign workers                    | 388 people (167 Indonesians, 81 Nepalese, 70 Bangladeshi, 47 Indians, 23 Myanmar) | Disease & injury | Communicable disease (Parasite)       | Low (44.4)      |  | A sample of 388 foreign workers were examined to describe the prevalence of Giardia duodenalis and Cryptosporidium parvum, showing that 42 people (10.8%) and 12 people (3.1%) tested positive, respectively. Indonesian nationality, work in the manufacturing and service sector, and newly arrived in Malaysia were significantly associated with G. duodenalis, while C. parvum was only significantly associated with employment in the food industry.                                                  |
| Nwabichie et al <sup>90</sup> | Prevalence (Des-2)   | N/A <sup>2</sup>              | Unclassified migrants              | 320 people <sup>2</sup> (50% Nigerians, 15% Ghanaians,                            | Risk behaviour   | Sexual behaviour (HPV knowledge)      | High (77.8)     |  | In total, 320 African female migrants were surveyed to investigate risk factors that are related to higher HPV risk behaviour. Only                                                                                                                                                                                                                                                                                                                                                                          |

## Results

|                              |                                     |                             |                 |                                                                                     |                  |                                 |                 |                                                                                                                                                                                                                                                                                                                                                                                                                                                                                                        |
|------------------------------|-------------------------------------|-----------------------------|-----------------|-------------------------------------------------------------------------------------|------------------|---------------------------------|-----------------|--------------------------------------------------------------------------------------------------------------------------------------------------------------------------------------------------------------------------------------------------------------------------------------------------------------------------------------------------------------------------------------------------------------------------------------------------------------------------------------------------------|
|                              |                                     |                             |                 | 35% Others [from Sudan, Tanzania, Kenya and South Africa])                          |                  |                                 |                 | 27.2% of the sample obtained cervical cancer screening, where higher levels of screening were significantly associated with having knowledge regarding cervical cancer, being married, having a standard health care provider, and no perceived barriers when obtaining the check-up.                                                                                                                                                                                                                  |
| Jeffree et al <sup>91</sup>  | Case control (Obs-3)                | N/A <sup>2</sup>            | Foreign workers | 470 people <sup>2</sup>                                                             | Disease & injury | Communicable disease (Parasite) | Moderate (60.0) | A case-control study was conducted to determine the risk factors related to a malaria outbreak, where rubber tappers – including one migrant worker – presented a higher infection rate.                                                                                                                                                                                                                                                                                                               |
| Zerguine et al <sup>92</sup> | Analytical cross-sectional (Obs-4)  | June 2016 to September 2016 | Foreign workers | 323 people (155 Bangladeshi, 126 Indonesians, 25 Pakistani, 11 Nepalese, 6 Chinese) | Disease & injury | Injury (Physical trauma)        | Moderate (57.1) | A total of 323 migrant workers were sampled to investigate the prevalence and causes of workplace injuries, and examine the relationship between these traumas and safety commitment variables. The study showed that 22.6% of the foreign workers suffered from a work-related injury, mostly due to falls from heights (31.5%), and that there was a significant association between various injuries and different safety commitment-related variables, such as safe equipment and safety training. |
| Ya'acob et al <sup>93</sup>  | Randomised controlled Trial (Exp-2) | N/A <sup>2</sup>            | Foreign workers | 54 Indonesians                                                                      | Disease & injury | Injury (Physical syndrome)      | Low (38.5)      | A workplace intervention was conducted to assess the effect of Kiken Yochi training on musculoskeletal symptoms among foreign workers, where the study showed that the intervention significantly decreased                                                                                                                                                                                                                                                                                            |

Results

|    |                                |                      |                             |                           |                               |                   |                                                                                                             |                                                                                 |                                                                                                                                                                                                                                                                                                                                                                                                                                                                |
|----|--------------------------------|----------------------|-----------------------------|---------------------------|-------------------------------|-------------------|-------------------------------------------------------------------------------------------------------------|---------------------------------------------------------------------------------|----------------------------------------------------------------------------------------------------------------------------------------------------------------------------------------------------------------------------------------------------------------------------------------------------------------------------------------------------------------------------------------------------------------------------------------------------------------|
|    |                                |                      |                             |                           |                               |                   |                                                                                                             | musculoskeletal symptoms in feet and ankle areas compared to the control group. |                                                                                                                                                                                                                                                                                                                                                                                                                                                                |
| 6  | Chuah et al <sup>9</sup>       | Qualitative (Qual-2) | July 2016 to November 2017  | Asylum seekers & refugees | 20 stakeholders <sup>14</sup> | Living conditions | Service environment (Healthcare utilisation)                                                                | High (80.0)                                                                     | Twenty stakeholders were interviewed to explore the barriers that refugees and asylum seekers encounter during healthcare utilisation, showing that cultural competency, insufficient health literacy, healthcare expenses, and not being aware of their rights were the main challenges.                                                                                                                                                                      |
| 15 | Loganathan et al <sup>94</sup> | Qualitative (Qual-2) | July 2018 to September 2018 | Foreign workers           | 18 stakeholders <sup>14</sup> | Living conditions | Service environment (Healthcare utilisation)                                                                | High (80.0)                                                                     | A qualitative study with 18 stakeholders demonstrated that migrant workers face several complications with respect to utilising healthcare, including financial issues, discrimination, lack of valid passports and work permits, cultural competency, and physical barriers.                                                                                                                                                                                  |
| 24 | Rahman et al <sup>95</sup>     | Prevalence (Des-3)   | N/A <sup>2</sup>            | Foreign workers           | 314 Bangladeshi               | Living conditions | Service environment (Healthcare utilisation)<br><br>Disease & injury<br>Various diseases (various diseases) | Low (33.3)                                                                      | A group of 314 migrant workers were sampled to present the distribution of diseases and healthcare utilisation pattern. Fever and sprains were the most reported diseases among the group that suffered from an illness in the last two weeks, while fever and gastrointestinal diseases were the most prevalent among the group that suffered from an illness in the last month. In addition, the majority (approx. 60%) visited hospitals to seek treatment. |
| 37 | Siah et al <sup>96</sup>       | Qualitative (Qual-3) | N/A <sup>2</sup>            | Asylum seekers & refugees | 8 stakeholders                | Living conditions | Social environment (Prejudice)                                                                              | Low (50.0)                                                                      | Eight people stakeholders were interviewed to explore the forms of discrimination that refugee                                                                                                                                                                                                                                                                                                                                                                 |

## Results

|                             |                      |                                |                           |                                                                                          |                   |                                              |             |                                                                                                                                                                                                                                                                             |
|-----------------------------|----------------------|--------------------------------|---------------------------|------------------------------------------------------------------------------------------|-------------------|----------------------------------------------|-------------|-----------------------------------------------------------------------------------------------------------------------------------------------------------------------------------------------------------------------------------------------------------------------------|
|                             |                      |                                |                           | (5 refugees, <sup>2</sup> 3 locals)                                                      |                   |                                              |             | children experience. The study shows that refugee children suffer from denied access to health care, not receiving proper education, and being judged by their social environment.                                                                                          |
| Sahimin et al <sup>97</sup> | Prevalence (Des-2)   | September 2014 and August 2015 | Foreign workers           | <i>610 people (246 Indonesians, 99 Nepalese, 72 Bangladeshi, 14 Indians, 14 Myanmar)</i> | Disease & injury  | Communicable disease (Parasite)              | Low (33.3)  | Four different diagnostic tests were applied to identify <i>Strongyloides stercoralis</i> among migrant workers, where prevalence rates differed between 0.8% and 35.8%                                                                                                     |
| Chuah et al <sup>98</sup>   | Qualitative (Qual-2) | July 2016 to January 2018      | Asylum seekers & refugees | 20 stakeholders <sup>14</sup>                                                            | Living conditions | Service environment (Healthcare utilisation) | High (80.0) | Twenty stakeholders were interviewed to identify the challenges with respect to accessing healthcare among refugees, showing that out of pocket healthcare spending, language and cultural competency barriers, and access to medication are the top healthcare challenges. |

\*Sample population in *italic* represents the migrant population;

\*\*The following abbreviations are used in the table: N/A = Data not available; HPV = Human Papilloma Virus

<sup>1</sup>Includes irregular migrants.

<sup>2</sup>Data to present detailed information is lacking.

<sup>3</sup>Includes children of migrant workers, which is according to the IOM (2011) definition still classified as migrant workers

<sup>4</sup>Includes detained migrants.

<sup>5</sup>Includes refugees, international students, expats, and unclassified migrants.

<sup>6</sup>Includes 3 expats; <sup>7</sup>Includes 6 transnational marriage migrants.

<sup>8</sup>Ambiguous reporting of the data.

<sup>9</sup>Includes a multiple-country study, and, therefore, subjects that were included in countries other than Malaysia are not reported in this table.

<sup>10</sup>Level of evidence and quality appraisal is not available for this study design.

<sup>11</sup>Includes an international student.

<sup>12</sup>Number of samples might not be similar to the number of study participants.

<sup>13</sup>Despite of lacking a comparison group, this study was identified as an analytical cross-sectional study due to the aim – testing two hypotheses – and comprehensive statistical analysis.

<sup>14</sup>Representing the population of interest (as shown in the ‘type of migrant’ category).



## Results

**359 Health dimension and type of migrant**

360 The literature was first assessed to understand the trends and topical coverage of research  
361 against the six dimensions of the BARHII public health framework. The first dimension,  
362 social inequities, was used to describe the population of interest and refers to the type of  
363 migrant (e.g., foreign workers, asylum seekers and refugees, or unclassified migrants). The  
364 other five dimensions focused on elements that influence the health status of the population  
365 of interest, including institutional inequities, living conditions, risk behaviour, disease and  
366 injury, and mortality and morbidity. These latter five categories are outlined below and  
367 include results on the types of migrants researched within these dimensions. Figures 4 and 5  
368 present overviews of the number of studies disaggregated by health dimension and type of  
369 migrant, respectively.

370

371 [INSERT FIGURE 4]

372

373 [INSERT FIGURE 5]

374

**375 Institutional inequities**

376 One paper addressed the institutional inequities dimension<sup>72</sup> by exploring the inclusion of  
377 migrant workers into national universal health coverage (UHC) policies in five countries of  
378 the Association of Southeast Asian Nations (ASEAN): Indonesia, Philippines, Malaysia,  
379 Thailand and Singapore. The researchers stated that Malaysia has implemented a medical  
380 insurance policy for foreign labour by obligating documented migrant workers to be enrolled  
381 in private insurance schemes, as non-citizens have no access to UHC at public facilities.

## Results

382 ***Living conditions***

383 Eleven papers were classified under the living conditions dimension, where most articles  
384 (n=9/11) addressed the service environment subdimension.<sup>9 36 63 64 76 80 94 95 98</sup> All of these  
385 papers studied the asylum seeker and refugee population, except for one article that focused  
386 on migrant workers.<sup>94</sup> Half the studies used qualitative methods to explore barriers to  
387 healthcare utilisation and showed that language difficulties, discrimination, insufficient health  
388 literacy, and cultural differences were common issues. One study focused on the social  
389 environment subdimension and showed that refugee children experienced discrimination by  
390 locals and other refugees of different ethnicities and national origins, such as stereotyping  
391 them as criminals.<sup>96</sup> Santos et al<sup>69</sup> assessed elements related to the work environment  
392 subdimension by investigating perceived environmental hazards among foreign workers,  
393 demonstrating that noise and dust were perceived as the greatest occupational health threats.

394 ***Risk behaviour***

395 Ten studies researched the risk behaviour dimension, with most articles (n=8/10) conducted  
396 on general migrant populations without clear identification of which migrant categories were  
397 included in their study.<sup>35 38 41 61 62 67 88 90</sup> Three of these articles focused on the sexual  
398 behaviour subdimension, exploring risk behaviour related to human papillomavirus (HPV).  
399 The studies showed that a significant number of migrant women have high HPV risk  
400 behaviour due to lack of understanding with respect to cervical cancer, the screening process,  
401 and poor knowledge concerning HPV vaccination.<sup>61 62 90</sup> Two papers, classified within the  
402 poor nutrition subdimension, showed poor health outcomes among detained migrants due to  
403 nutrition deficiencies.<sup>38 88</sup> The other articles among unclassified migrants included two  
404 studies on violence and abuse, exploring maternal filicide<sup>67</sup> and neglecting children<sup>35</sup>; and  
405 one study on alcohol and other drugs, pertaining to inhalants' usage.<sup>41</sup> These three studies

## Results

1  
2  
3 406 simply showed that migrants represent a certain proportion of the identified cases. Only the  
4  
5 407 study on the use of inhalants presented more cases among migrants than locals. Two final  
6  
7 408 studies included foreign workers and explored the hygiene and sanitation and hazard and  
8  
9 409 safety awareness subdimensions.<sup>77 82</sup> Kamaludin & How<sup>77</sup> stated that migrant workers had  
10  
11 410 significantly less knowledge regarding environmental health, such as air quality, natural  
12  
13 411 hazards, sanitation, and industrial hazards, compared to local workers. Woh et al<sup>82</sup>  
14  
15 412 investigated the level of hygiene among migrant food handlers and argued that personal  
16  
17 413 hygiene and sanitation measures should be improved among this population.  
18  
19  
20  
21  
22

414 ***Disease and injury***

23  
24  
25  
26 415 With a total of 46 studies, the disease and injury dimension presented the largest study field  
27  
28 416 of interest related to the BARHII framework. Most articles (n=36/46) studied foreign  
29  
30 417 workers,<sup>37 40 43 44 46-56 58-60 66 69 73-75 78 79 81 83-86 89 91-93 95 97</sup> while only six and four articles  
31  
32 418 included unclassified migrants<sup>39 45 57 65 68 70</sup> and refugee populations,<sup>33 34 71 87</sup> respectively. The  
33  
34 419 majority (n=27/46) of the articles studied communicable diseases, where 18 of these studies  
35  
36 420 focused on parasites,<sup>34 37 39 43 44 48-52 59 74 75 84 85 89 91 97</sup> eight on bacteria,<sup>45 47 60 65 68 70 79 81</sup> and  
37  
38 421 two on viruses.<sup>55 70</sup> Most of the studies were descriptive and presented that migrants,  
39  
40 422 irrespective of the defined type, represented a significant share among the study populations.  
41  
42 423 Non-communicable diseases were studied far less compared to communicable diseases and  
43  
44 424 were only specifically addressed in three articles.<sup>33 53 73</sup> Scheutz et al<sup>33</sup> found high numbers of  
45  
46 425 different non-communicable oral complications among Vietnamese refugees, such as tooth  
47  
48 426 decay and missing teeth. Vijian et al<sup>73</sup> compared the difference in characteristics between  
49  
50 427 foreign workers and Malaysian patients with perforated peptic ulcers, showing that the  
51  
52 428 treated foreign labour population were younger, experienced fewer post-operative  
53  
54  
55  
56  
57  
58  
59  
60

## Results

1  
2  
3 429 complications, and had smaller-sized ulcers compared to locals. Murty<sup>53</sup> reported a case  
4  
5 430 study, presenting a deceased migrant worker due to a cystic tumour in the heart region.  
6  
7  
8  
9 431 In addition to the studies that focused on single disease outcomes, two studies were  
10  
11 432 conducted that presented distributions of various diseases among foreign workers, including  
12  
13 433 communicable and non-communicable disorders.<sup>46 95</sup> Five studies focused on the mental  
14  
15 434 health subdimension, where these studies concentrated on describing psychiatric disorders,<sup>40</sup>  
16  
17 435 determining quality of life-related risk factors,<sup>57 71</sup> and testing the effect of different coping  
18  
19 436 mechanisms and therapy sessions on the level of stress.<sup>83 87</sup> Nine studies explored the injury  
20  
21 437 subdimension, where nearly all (n=8/9) studies focused on work-related injuries. Most of  
22  
23 438 these studies examined the prevalence of particular injuries and traumas, including fatal  
24  
25 439 lightning strikes,<sup>54</sup> ocular traumas,<sup>78</sup> and musculoskeletal pain.<sup>66 69 86</sup> Ratnasingam et al<sup>58</sup>  
26  
27 440 compared the number of occupational incidents between local workers and migrant workers,  
28  
29 441 where foreign workers had less accidents. In addition, two papers described risk factors for  
30  
31 442 work-related injuries, such as high machine-related vibration exposure<sup>56</sup> and low levels of the  
32  
33 443 company's safety commitment (as assessed by foreign workers themselves).<sup>92</sup> Ya'acob et al<sup>93</sup>  
34  
35 444 conducted an RCT to evaluate the impact of a specific workplace intervention on  
36  
37 445 musculoskeletal symptoms (MMS) among foreign labour and showed that the intervention  
38  
39 446 reduced musculoskeletal symptoms in the foot and ankle regions significantly compared to  
40  
41 447 the control group.

**448 Mortality and morbidity**

449 Two papers addressed the mortality and morbidity dimension by showing incidence rates  
450 among general cohorts of migrants. Zulkifli et al<sup>36</sup> conducted a study on maternal and child  
451 health in Sabah and identified that infant mortality rates were significantly higher for  
452 migrants compared to locals. Dony et al<sup>42</sup> also conducted a study in Sabah and showed that at

## Results

1  
2  
3 453 least 24% of new tuberculosis cases detected since 1990 were among migrants and that  
4  
5 454 leprosy incidence rates among migrants were on average 3.7 times higher than incidence rates  
6  
7 455 among Malaysians.  
8  
9

10  
11 456 **Level of evidence and quality of the study**  
12

13  
14 457 In total, 65 articles were included in the quality assessment; Tables 6 and 7 show the mean  
15  
16 458 quality scores of the papers disaggregated by BARHII dimension and level of evidence,  
17  
18 459 respectively. Two articles – representing a scoping review<sup>72</sup> and mixed-method design<sup>80</sup> –  
19  
20 460 were excluded from this assessment, as the JBI toolkit does not accommodate these study  
21  
22 461 designs. The quality assessment scores can be found in Supplementary file 3. In addition,  
23  
24 462 Figure 6 shows an overview of the number of studies disaggregated by research design.  
25  
26  
27  
28  
29  
30  
31  
32  
33  
34  
35  
36  
37  
38  
39  
40  
41  
42  
43  
44  
45  
46  
47  
48  
49  
50  
51  
52  
53  
54  
55  
56  
57  
58  
59  
60

## Results

| Table 6   Number and average quality of included articles disaggregated by type of migrant and BARHII dimensions |                                                           |      |      |      |      |      |      |      |      |                 |              |                                                       |
|------------------------------------------------------------------------------------------------------------------|-----------------------------------------------------------|------|------|------|------|------|------|------|------|-----------------|--------------|-------------------------------------------------------|
| Category                                                                                                         | Number of studies per study design with level of evidence |      |      |      |      |      |      |      |      | Total # studies | Mean quality | References                                            |
|                                                                                                                  | CR-4                                                      | AC-4 | QL-3 | CS-3 | PR-3 | CC-3 | QL-2 | PR-2 | RC-2 |                 |              |                                                       |
| <i>Type of migrant</i>                                                                                           |                                                           |      |      |      |      |      |      |      |      |                 |              |                                                       |
| Asylum seekers & refugees                                                                                        | -                                                         | 1    | 1    | -    | 1    | -    | 3    | 2    | 1    | 10 <sup>1</sup> | 58.4%        | 9 33 34 63 64 71 80 87 96 98                          |
| Foreign workers                                                                                                  | 4                                                         | 7    | -    | 4    | 10   | 1    | 1    | 12   | 1    | 41 <sup>2</sup> | 45.7%        | 37 40 43 44 46-56 58-60 66 69 72-79 81-86 89 91-95 97 |
| Unclassified migrants                                                                                            | -                                                         | 1    | -    | 6    | 2    | 2    | -    | 5    | -    | 16              | 52.7%        | 35 36 38 39 41 42 45 57 61 62 65 67 68 70 88 90       |
| <i>Dimension of BARHII framework</i>                                                                             |                                                           |      |      |      |      |      |      |      |      |                 |              |                                                       |
| Institutional inequities                                                                                         | -                                                         | -    | -    | -    | -    | -    | -    | -    | -    | 1 <sup>2</sup>  | -            | 72                                                    |
| Living conditions                                                                                                | -                                                         | 2    | 1    | -    | 1    | -    | 4    | 2    | -    | 11 <sup>1</sup> | 59.7%        | 9 36 63 64 69 76 80 94-96 98                          |
| Risk behaviour                                                                                                   | -                                                         | 1    | -    | 3    | 1    | 1    | -    | 4    | -    | 10              | 48.7%        | 35 38 41 61 62 67 77 82 88 90                         |
| Disease & injury                                                                                                 | 4                                                         | 6    | -    | 7    | 11   | 2    | -    | 14   | 2    | 46              | 46.3%        | 33 34 37 39 40 43-60 65 66 68-71 73-75 78 79 81 83-87 |
| Mortality & morbidity                                                                                            | -                                                         | 1    | -    | -    | 1    | -    | -    | -    | -    | 2               | 47.9%        | 89 91-93 95 97                                        |
|                                                                                                                  |                                                           |      |      |      |      |      |      |      |      |                 |              | 36 42                                                 |
| <i>Subdimensions of institutional inequities</i>                                                                 |                                                           |      |      |      |      |      |      |      |      |                 |              |                                                       |
| Laws & regulations                                                                                               | -                                                         | -    | -    | -    | -    | -    | -    | -    | -    | 1 <sup>2</sup>  | -            | 72                                                    |
| <i>Subdimensions of living conditions</i>                                                                        |                                                           |      |      |      |      |      |      |      |      |                 |              |                                                       |
| Social environment                                                                                               | -                                                         | -    | 1    | -    | -    | -    | -    | -    | -    | 1               | 50.0%        | 96                                                    |
| Economic and work environment                                                                                    | -                                                         | -    | -    | -    | -    | -    | -    | 1    | -    | 1               | 44.4%        | 69                                                    |
| Service environment                                                                                              | -                                                         | 2    | -    | -    | 1    | -    | 4    | 1    | -    | 9 <sup>1</sup>  | 62.8%        | 9 36 63 64 76 80 94 95 98                             |
| <i>Subdimensions of risk behaviour</i>                                                                           |                                                           |      |      |      |      |      |      |      |      |                 |              |                                                       |
| Poor nutrition                                                                                                   | -                                                         | -    | -    | 1    | -    | 1    | -    | -    | -    | 2               | 50.0%        | 38 88                                                 |
| Violence & abuse                                                                                                 | -                                                         | -    | -    | 2    | -    | -    | -    | -    | -    | 2               | 70.0%        | 35 67                                                 |
| Alcohol & other drugs                                                                                            | -                                                         | -    | -    | -    | -    | -    | -    | 1    | -    | 1               | 22.2%        | 41                                                    |
| Sexual behaviour                                                                                                 | -                                                         | -    | -    | -    | 1    | -    | -    | 2    | -    | 3               | 50.9%        | 61 62 90                                              |
| Hygiene & sanitation                                                                                             | -                                                         | -    | -    | -    | -    | -    | -    | 1    | -    | 1               | 22.2%        | 82                                                    |
| Hazard & safety awareness                                                                                        | -                                                         | 1    | -    | -    | -    | -    | -    | -    | -    | 1               | 50.0%        | 77                                                    |

Results

| <i>Subdimensions of disease &amp; injury</i>      |          |          |          |           |           |          |          |           |          |                         |              |                                                       |
|---------------------------------------------------|----------|----------|----------|-----------|-----------|----------|----------|-----------|----------|-------------------------|--------------|-------------------------------------------------------|
| Communicable disease                              | 3        | 2        | -        | 6         | 4         | 2        | -        | 10        | -        | 27                      | 44.2%        | 34 37 39 43-45 47-52 55 59 60 65 68 70 74 75 79 81 84 |
| Non-communicable disease                          | 1        | 1        | -        | -         | 1         | -        | -        | -         | -        | 3                       | 50.8%        | 85 89 91 97                                           |
| Injury                                            | -        | 2        | -        | 1         | 3         | -        | -        | 2         | 1        | 9                       | 47.4%        | 33 53 73                                              |
| Mental health                                     | -        | 1        | -        | -         | 1         | -        | -        | 2         | 1        | 5                       | 56.1%        | 54 56 58 66 69 78 86 92 93                            |
| Various diseases                                  | -        | -        | -        | -         | 2         | -        | -        | -         | -        | 2                       | 38.9%        | 40 57 71 83 87                                        |
|                                                   |          |          |          |           |           |          |          |           |          |                         |              | 46 95                                                 |
| <i>Subdimensions of mortality &amp; morbidity</i> |          |          |          |           |           |          |          |           |          |                         |              |                                                       |
| Mortality rates                                   | -        | 1        | -        | -         | -         | -        | -        | -         | -        | 1                       | 33.3%        | 36                                                    |
| Morbidity rates                                   | -        | -        | -        | -         | 1         | -        | -        | -         | -        | 1                       | 62.5%        | 42                                                    |
| <b>Total</b>                                      | <b>4</b> | <b>9</b> | <b>1</b> | <b>10</b> | <b>13</b> | <b>3</b> | <b>4</b> | <b>19</b> | <b>2</b> | <b>67<sup>1,2</sup></b> | <b>49.2%</b> | <b>9<sup>33-98</sup></b>                              |

463 \*Abbreviations for the type of study with the related level of evidence (the number after the dash) are used to describe the included studies: CR-4 = case report; AC-4 = analytical cross-sectional  
 464 study; QL-3 = qualitative study with less rigour; CS-3 = case series; PR-3 = prevalence study without analytical component; CC-3 = case control; QL-2 = qualitative study with more rigor; PR-2  
 465 = prevalence study with analytical component; RC-2 = randomised controlled trial.  
 466 \*\*Level of evidence ranks from 1 to 4, where 1 is the highest level of evidence and 4 is the lowest level.  
 467 <sup>1</sup>Includes a mixed-method design, which was not appraised for level of evidence nor quality of the study;  
 468 <sup>2</sup>Includes a scoping review design, which was not appraised for level of evidence nor quality of the study.

## Results

**Table 7 | Number and average quality of included articles disaggregated by research design category**

| Research design                                          | Level of evidence | Included studies      | Mean quality | References                                                                        |
|----------------------------------------------------------|-------------------|-----------------------|--------------|-----------------------------------------------------------------------------------|
| <i>Descriptive research</i>                              |                   |                       |              |                                                                                   |
| Systematic review of descriptive studies                 | 1                 | -                     | -            | -                                                                                 |
| Prevalence study with analytical component               | 2                 | 19                    | 39.7%        | 34 41 47 55 57 58 62 69-71 74-76 81 82 85 89 90 97                                |
| Case series                                              | 3                 | 10                    | 46.7%        | 35 38 39 45 48 51 54 60 65 67                                                     |
| Prevalence study without analytical component            | 3                 | 13                    | 49.8%        | 33 37 40 42 44 46 61 66 78 79 84 86 95                                            |
| Case report                                              | 4                 | 4                     | 81.5%        | 43 49 53 59                                                                       |
| <b>Total</b>                                             |                   | <b>46</b>             | <b>47.7%</b> | <b>33-35 37-49 51 53-55 57-62 65-67 69-71 74-76 78 79 81 82 84-86 89 90 95 97</b> |
| <i>Experimental research</i>                             |                   |                       |              |                                                                                   |
| Systematic review/meta-analysis of experimental studies  | 1                 | -                     | -            | -                                                                                 |
| Randomised controlled trial                              | 2                 | 2                     | 34.7%        | 87 93                                                                             |
| Group quasi-experimental study (non-randomised)          | 3                 | -                     | -            | -                                                                                 |
| Quasi-experimental study with single subject             | 4                 | -                     | -            | -                                                                                 |
| <b>Total</b>                                             |                   | <b>2</b>              | <b>34.7%</b> | <b>87 93</b>                                                                      |
| <i>Observational research</i>                            |                   |                       |              |                                                                                   |
| Systematic review/meta-analysis of observational studies | 1                 | -                     | -            | -                                                                                 |
| Cohort study                                             | 2                 | -                     | -            | -                                                                                 |
| Case-control                                             | 3                 | 3                     | 56.7%        | 68 88 91                                                                          |
| Analytical cross-sectional study                         | 4                 | 9                     | 42.6%        | 36 50 52 56 64 73 77 83 92                                                        |
| <b>Total</b>                                             |                   | <b>12</b>             | <b>46.1%</b> | <b>36 50 52 56 64 68 73 77 83 88 91 92</b>                                        |
| <i>Qualitative research</i>                              |                   |                       |              |                                                                                   |
| Systematic review/meta-synthesis of qualitative studies  | 1                 | -                     | -            | -                                                                                 |
| Group qualitative studies with more rigor                | 2                 | 4                     | 82.5%        | 9 63 94 98                                                                        |
| Group qualitative studies with less rigor                | 3                 | 1                     | 50.0%        | 96                                                                                |
| Qualitative study with a single informant                | 4                 | -                     | -            | -                                                                                 |
| <b>Total</b>                                             |                   | <b>5</b>              | <b>76.0%</b> | <b>9 63 94 96 98</b>                                                              |
| <b>Total</b>                                             |                   | <b>67<sup>1</sup></b> | <b>49.2%</b> | <b>9 33-98</b>                                                                    |

469

<sup>1</sup>Includes a mixed-method design and a scoping review, which were both not assessed for the level of evidence nor quality appraisal.



## Results

1  
2  
3 470 [INSERT FIGURE 6]  
4  
5  
6

7 471  
8  
9

10 472 In general, the quality of the evidence base on migrant health in Malaysia is low (49.2%) and  
11  
12 473 consists mostly of level 3 evidence papers (n=27/65). Level 2 evidence represents 38.5% of  
13  
14 474 the evidence base (n=25/65), followed by level 4 evidence papers (n=13/65). No level 1  
15  
16 475 evidence studies (systematic reviews or meta-analyses) were identified. The majority of the  
17  
18 476 papers (n=41/65) focused on foreign workers, however, studies that included asylum seekers  
19  
20 477 and refugees have the highest mean quality (58.4%). Furthermore, only four out of five  
21  
22 478 BARHII health dimensions were included in the quality assessment. The living conditions  
23  
24 479 dimension has the highest average score (59.7%), followed by the risk behaviour dimension  
25  
26 480 (48.7%), mortality and morbidity dimension (47.9%), and the disease and injury dimension  
27  
28 481 (46.3%). Moreover, the descriptive research category represents the majority (70.8%) of the  
29  
30 482 evidence base with a mean quality of 47.7%. The qualitative research category has the  
31  
32 483 highest mean quality and is the only research category with a high-quality score (76%).  
33  
34  
35  
36  
37  
38

39 484 **Associations between different variables**  
40  
41

42 485 Figure 7 presents the results of the multiple-correspondence analysis (MCA), showing  
43  
44 486 different associations between four dimensions: 1) type of study design; 2) quality of the  
45  
46 487 study; 3) type of migrant; and 4) main health dimension. Chi-square test results were utilised  
47  
48 488 to assess whether categorical variables were independent.  
49  
50  
51  
52

53 489  
54  
55

56 490 [INSERT FIGURE 7]  
57  
58  
59  
60 491

## Results

1  
2  
3 492 High-quality studies tend to include refugees and asylum seekers ( $X^2 = 17.005$ ,  $df = 4$ , p-  
4  
5 493 value = 0.001928), focus on living conditions ( $X^2 = 131.94$ ,  $df = 6$ , p-value =  $< 2.2e-16$ ), and  
6  
7 494 have a qualitative research design ( $X^2 = 656.35$ ,  $df = 12$ , p-value =  $< 2.2e-16$ ). Moreover,  
8  
9 495 studies that included foreign workers tend to focus on diseases and injuries ( $X^2 = 374.52$ ,  $df =$   
10  
11 496 6, p-value =  $< 2.2e-16$ ) and contain a case report study design ( $X^2 = 576.87$ ,  $df = 12$ , p-value  
12  
13 497 =  $< 2.2e-16$ ). Furthermore, research that included the unclassified migrant population tend to  
14  
15 498 study the risk behaviour, and mortality and morbidity dimensions ( $X^2 = 374.52$ ,  $df = 6$ , p-  
16  
17 499 value =  $< 2.2e-16$ ). Lastly, prevalence studies, and, to a lesser extent, analytical cross-  
18  
19 500 sectional studies, tend to have a low-quality score ( $X^2 = 656.35$ ,  $df = 12$ , p-value =  $< 2.2e-$   
20  
21 501 16).  
22  
23  
24  
25  
26  
27  
28  
29  
30  
31  
32  
33  
34  
35  
36  
37  
38  
39  
40  
41  
42  
43  
44  
45  
46  
47  
48  
49  
50  
51  
52  
53  
54  
55  
56  
57  
58  
59  
60

Conclusion

## 502 Discussion

### 503 Key findings

504 This study mapped the existing academic literature on migrant health in Malaysia and  
 505 assessed the quality and level of evidence of these scientific studies. The majority of these  
 506 studies focus on the ‘disease and injury’ dimension, especially infectious diseases, and  
 507 includes mostly foreign workers. Two health dimensions (institutional inequality, and  
 508 morbidity and mortality) as well as various subdimensions of each health dimension, are  
 509 lacking substantial research. In addition, only a few papers include the asylum seeker and  
 510 refugee population, and a vast amount do not provide any details to classify the type of  
 511 migrant. The average quality of the papers was low, yet quality differed significantly among  
 512 the studies. High-quality studies were mostly qualitative designs that included refugees and  
 513 focused on living conditions, while prevalence and analytical cross-sectional studies were  
 514 mostly low quality. In terms of research trends, no specific changes in type of migrant, health  
 515 dimension or quality of the study have been observed over the last six decades. However, it  
 516 should be noted that qualitative research made its entry in the early 2010s and made up a vast  
 517 amount of the papers published in recent years. Future research priorities based on the  
 518 existing evidence and identified gaps are summarised in Table 8.

**Table 8 | Main recommendations to improve future research on migrant health**

| Recommendation                                                                                                                                                                                                                                                                                                                                                                                                      |
|---------------------------------------------------------------------------------------------------------------------------------------------------------------------------------------------------------------------------------------------------------------------------------------------------------------------------------------------------------------------------------------------------------------------|
| Improve the description of the target migrant population by including information regarding the type of migrant (e.g., foreign worker, refugee), visa status (e.g., regular, irregular), country of origin, socioeconomic variables (e.g., level of education, income), mode of transport during migration journey (e.g., boat, car), and the existence of forced entry (e.g., human trafficking, forced marriage). |
| Create associations between different stages of migration (pre-departure, travel, destination, interception, and return phase) and health outcomes.                                                                                                                                                                                                                                                                 |
| More research output concerning governance and institutional inequities and mortality and morbidity, and, consequently, conduct a time series analysis between these two dimensions to identify and possible relationships.                                                                                                                                                                                         |
| More research output regarding non-communicable diseases, especially on the main causes of death in Malaysia; cardiovascular diseases, chronic respiratory diseases, and diabetes.                                                                                                                                                                                                                                  |

## Conclusion

|                                                                                                                                                        |
|--------------------------------------------------------------------------------------------------------------------------------------------------------|
| More research output concerning several subdimension of risk behaviour, especially on smoking, physical inactivity, and alcohol abuse.                 |
| Evaluate the impact of health and non-health policies on migrant health.                                                                               |
| Explore living conditions regarding the physical environment, such as housing and environmental conditions, and the impact on migrant health outcomes. |
| Promotion of guidelines on study conduct and reporting among researchers.                                                                              |

519

520 Among the five BARHII health dimensions, institutional inequities, and mortality and  
 521 morbidity were the least represented. Yet, studies concerning the influence of governance on  
 522 migrant health are of utmost importance, as overarching governance can affect health  
 523 outcomes of the other BARHII dimensions.<sup>99 100</sup> Similarly, epidemiological research on  
 524 mortality and morbidity rates are necessary for population health statistics, to identify disease  
 525 patterns, document changes over time, and inform plans of action to tackle these health  
 526 issues.<sup>101</sup> Further research should focus on migrant health governance, as well as  
 527 epidemiological research on morbidity and mortality among both migrants and non-migrants,  
 528 to better understand the effects of policies on migrant health, which is particularly relevant in  
 529 low- and middle-income countries (LMICs) where the evidence gap is so acute.<sup>102</sup>  
 530 Furthermore, a recent systematic review on the effects of non-health-targeted policies on  
 531 migrant health in high-income countries showed that non-health policies (e.g., restrictive  
 532 immigration policies) were associated with poor health outcomes.<sup>103</sup> It is therefore important  
 533 that policies in other sectors (potentially including, e.g., immigration, labour, education) are  
 534 also assessed for their potential consequences for migrant health.

535 Living conditions were represented in eleven studies and focused mainly (n=9/11) on the  
 536 service environment by addressing the healthcare setting. However, there is scarce  
 537 information on the social and economic environments that different categories of migrants  
 538 must navigate and no data on the physical environment at all. Research conducted in other  
 539 countries demonstrates the importance of these three subdimensions on migrant health.<sup>104-106</sup>

## Conclusion

1  
2  
3 540 Shao et al<sup>104</sup> argued that inequalities regarding the level of income (economic environment)  
4  
5 541 influenced health outcomes among internal migrant workers in China. He & Wong<sup>105</sup> stated  
6  
7 542 that poor mental health among female migrant workers in China was related to gender-  
8  
9 543 specific stressors (social environment). Al-Khatib et al<sup>106</sup> demonstrated that poor housing  
10  
11 544 conditions (physical environment) in a refugee camp were directly associated with various  
12  
13 545 upper respiratory tract diseases. These studies underscore the importance of different  
14  
15 546 environments on migrant health, motivating a focus of future research on the health impact of  
16  
17 547 living conditions other than healthcare utilisation.  
18  
19  
20  
21  
22

23 548 Ten studies were conducted on risk behaviour with different subdimensions, from hygiene  
24  
25 549 and sanitation to violent and abusive behaviour. However, all of these subdimensions were  
26  
27 550 under-researched, as only limited elements of each subdimension were discussed. For  
28  
29 551 instance, three studies focused on sexual behaviour by addressing HPV knowledge.<sup>61 62 90</sup>  
30  
31 552 Yet, no attention was given to other sexual behaviour-related topics, such as condom use,  
32  
33 553 HIV knowledge, and birth control. Although these studies have been conducted in Malaysia,  
34  
35 554 this research is lacking in the migration context.<sup>107-109</sup> Therefore, future research should focus  
36  
37 555 on broader aspects of each subdimension, as demonstrated in research elsewhere. For  
38  
39 556 example, Renzaho & Burns<sup>110</sup> addressed the poor nutrition subdimension by showing that  
40  
41 557 dietary patterns among African migrants changed negatively after arriving in Australia due to  
42  
43 558 the increased intake of fast food and processed food. Ganle et al<sup>111</sup> concentrated on the sexual  
44  
45 559 risk behaviour subdimension and stated that 71% of the sampled refugees in Ghana had  
46  
47 560 transactional sex, and only 12% used contraceptives. Bosdriesz et al<sup>112</sup> compared smoking  
48  
49 561 between migrants and non-migrants in the United States (US) and showed that migrants  
50  
51 562 smoked less than US citizens. As a significant number of migrants in Malaysia come from  
52  
53 563 Indonesia, a population that smokes almost twice as much as Malaysians, smoking behaviour  
54  
55 564 among this migrant group may differ from locals.<sup>113</sup> Therefore, future research should further  
56  
57  
58  
59  
60

## Conclusion

1  
2  
3 565 explore the differences in other risk behaviours, such as smoking, between Malaysians and  
4  
5 566 migrants in Malaysia.

6  
7  
8  
9 567 Disease and injury was the most researched dimension, representing more than two-thirds of  
10  
11 568 the evidence base on migrant health in Malaysia. Despite the strong representation, over half  
12  
13 569 the research papers concentrated on communicable diseases, while only a few examined non-  
14  
15 570 communicable diseases, consistent with global research output on international migrant  
16  
17 571 workers.<sup>114</sup> As the World Health Organization (WHO)<sup>115</sup> states that approximately 74% of all  
18  
19 572 deaths in Malaysia are attributable to non-communicable disease, in particular cardiovascular  
20  
21 573 disease, chronic respiratory disease, and diabetes, there is a need to expand research on non-  
22  
23 574 communicable disease trends and outcomes among the migrant population in Malaysia.

24  
25  
26  
27  
28 575 We found that the majority of studies involved foreign workers (n=41/67), and only ten  
29  
30 576 studies examined asylum seekers and refugees as the primary population of interest. Our  
31  
32 577 findings, therefore, offer useful synthesis on migrant worker's health specifically, which is  
33  
34 578 lacking relative to studies on asylum seekers and refugees in global migration health  
35  
36 579 research.<sup>14</sup> Furthermore, eleven studies did not specify the included migrant population. This  
37  
38 580 issue could have occurred due to missing information on the type of migrant in the dataset  
39  
40 581 that the researchers used for their studies. For example, the Ministry of Health (MOH) will  
41  
42 582 not report anything more detailed than 'non-Malaysian,' as no further information on non-  
43  
44 583 citizens are collected during patient registration at MOH facilities. Ideally, all research on  
45  
46 584 migrants should clearly specify the type of migrants being studied and not omit crucial  
47  
48 585 details, such as gender, visa status, and country of origin. Also, human trafficking could  
49  
50 586 significantly affect a person's health and vulnerability, yet, there is very little known about  
51  
52 587 the health issues experienced by trafficked persons in Malaysia.<sup>116</sup> While the vulnerabilities  
53  
54 588 experienced by trafficked persons intersect with other migration-related vulnerabilities like  
55  
56  
57  
58  
59  
60

## Conclusion

1  
2  
3 589 gender, ethnicity or documentation status, victims of human trafficking should be categorised  
4  
5 590 separately, to reflect their own unique status and vulnerability. The travel routes or modes of  
6  
7 591 transportation used by migrants to come to Malaysia may influence migrant health in  
8  
9 592 different ways as well, as different routes or modes of transportation may be linked with  
10  
11 593 specific hazards. Related to this issue is the lack of evidence on migrant health with specific  
12  
13 594 stages of migration, including pre-departure, travel, destination interception, and return,  
14  
15 595 where health outcomes might differ between these stages.<sup>117</sup>

16  
17  
18  
19  
20 596 Lastly, this scoping review revealed that the average quality of studies on migrant health in  
21  
22 597 Malaysia is poor (49.2%) and that most of these studies have level 3 (n=27/65) or level 2  
23  
24 598 (n=25/65) evidence. Only qualitative studies with more rigour (level 2 evidence) and those  
25  
26 599 that focus on living conditions and include the refugee and asylum seeker populations, tend to  
27  
28 600 have a high-quality score. Therefore, there is a clear need to conduct research that will  
29  
30 601 provide strong evidence to support practices and policies that will positively impact migrant  
31  
32 602 health. Creating standard research design-specific guidelines, if not existing already, and,  
33  
34 603 subsequently, promoting these materials among academics and research institutions, could  
35  
36 604 increase the quality of future research work. Furthermore, researchers should follow study  
37  
38 605 design specific reporting guidelines, to ensure that all relevant information is captured in  
39  
40 606 publications for further evidence synthesis, such as this review.

**607 Limitations**

41  
42  
43  
44  
45  
46  
47  
48  
49  
50 608 This study is the first systematic literature synthesis and scoping review on migrant health in  
51  
52 609 Malaysia and presents a comprehensive overview of all identified peer-reviewed articles that  
53  
54 610 met the inclusion criteria. Specific recommendations based on this research are provided to  
55  
56 611 improve the evidence base on migrant health in Malaysia. Furthermore, we utilised a self-  
57  
58 612 developed decision tree and modified JBI checklists to help identify the type of study design  
59  
60

## Conclusion

1  
2  
3 613 and corresponding level of evidence of the included studies. We found this evidence  
4  
5 614 assessment framework to be useful for the quality assessment of migrant health-related  
6  
7 615 studies, and it might be useful for other research fields as well. Yet, our review has several  
8  
9 616 limitations. As this paper focuses exclusively on vulnerable migrants within the non-citizen  
10  
11 617 population in Malaysia, we excluded other non-citizen groups, such as expatriates and  
12  
13 618 international students, based on the assumption that these groups are less vulnerable (e.g.,  
14  
15 619 expatriates in Malaysia have more privileges in terms of recognition regarding their roles in  
16  
17 620 society, receive better financial compensation, and tend to have access to many other benefits  
18  
19 621 compared to foreign workers). However, we acknowledge that other non-citizen groups may  
20  
21 622 face challenges in obtaining proper healthcare in Malaysia as well, such as issues related to  
22  
23 623 cultural competency among foreign students and retirees.<sup>118 119</sup> In addition, papers including  
24  
25 624 non-citizens without further description were excluded, although these studies may have  
26  
27 625 included the vulnerable migrant population.

28  
29  
30  
31  
32  
33  
34 626 Only academic peer-reviewed studies were included, thus excluding grey literature,  
35  
36 627 editorials, and opinion papers. Also, only English language articles were included, resulting  
37  
38 628 in the exclusion of one identified paper in Bahasa Malaysia (the Malay language).<sup>120</sup>  
39  
40 629 Aggravating the issue, other Malaysian articles might not have been identified due to the lack  
41  
42 630 of Malaysian keywords in the search strategy. As a result, much relevant information that  
43  
44 631 could potentially be used to inform both policies and practice, as well as to make this review  
45  
46 632 more comprehensive, may have been excluded from this review.

47  
48  
49  
50  
51 633 Inter-rater reliability was limited to a 20% sample of the records in the first (abstract and title)  
52  
53 634 screening stage, and no data extraction nor quality assessment was verified by a second  
54  
55 635 reviewer due to time and resource constraints. Yet, we anticipate low selection bias as the  
56  
57 636 health dimensions in the BARHII framework present clear distinctions between each other,  
58  
59  
60



## Conclusion

1  
2  
3 637 and most of the included papers used objective indicators. For example, when a paper was  
4  
5 638 measuring the knowledge and awareness regarding the pap smear test among female  
6  
7 639 migrants, it would be classified as a 'risk behaviour' study. Furthermore, we believe that the  
8  
9 640 development of the decision tree and additional objective criteria for the JBI tools – an  
10  
11 641 example was given earlier in Table 4 – reduced the subjectivity of this study, and, hence,  
12  
13 642 increases the reliability. Yet, future research is needed to validate both the decision tree and  
14  
15 643 modified JBI toolkit.  
16  
17  
18  
19  
20 644 Besides the BARHII framework, various conceptual public health models are available, and  
21  
22 645 these models may include different (sub)dimensions. For instance, the WHO Commission on  
23  
24 646 Social Determinants of Health (CSDH) framework includes material circumstances, such as  
25  
26 647 food availability, whereas this dimension is not included in the BARHII framework.<sup>121</sup>  
27  
28  
29 648 Similarly, critical appraisal tools other than the JBI toolkit are available, which could address  
30  
31 649 different points to determine the quality of the study. Therefore, it would be helpful to assess  
32  
33 650 other public health models and critical appraisal tools to see if they include additional  
34  
35 651 elements (e.g., food availability) that would be beneficial for future studies.  
36  
37  
38  
39  
40 652 Likewise, a decision tree was developed by using the characteristics of the used definitions of  
41  
42 653 different research designs as well as the specific traits of Tomlin & Borgetto's<sup>29</sup> level of  
43  
44 654 evidence model. Using other definitions and level of evidence models could result in a  
45  
46 655 different level of evidence categorisation. However, we believe this review makes a strong  
47  
48 656 methodological contribution by combining study designs and level of evidence in a unified  
49  
50 657 decision tree, which can be used by researchers conducting systematic or scoping reviews  
51  
52 658 where accurate classification of the study design and associated evidence level, is important.  
53  
54  
55  
56  
57 659 In order to conduct the multiple-correspondence analysis (MCA), the dataset could only  
58  
59 660 include one unit per dimension for each paper. As some studies included multiple BARHII

## Conclusion

1  
2  
3 661 dimensions, only the most prominent dimension was included in the analysis. As a result, the  
4  
5 662 analysis may suffer from some selection bias and present slightly different outcomes  
6  
7 663 compared to an analysis that includes the other BARHII dimensions.  
8  
9

10  
11 664 Lastly, no adjustments were made for outliers in the quality assessment. Therefore, some  
12  
13 665 papers with extremely high or low scores could have influenced specific dimensions and  
14  
15 666 might not reflect the quality of those dimensions perfectly.  
16  
17

667 **Conclusion**

18  
19  
20  
21  
22  
23 668 Migrant health remains an issue in Malaysia, yet, the quality of the evidence needed to  
24  
25 669 inform policies is currently lacking. Research-specific reporting guidelines should be  
26  
27 670 followed to improve the credibility and quality of the evidence base. Furthermore, future  
28  
29 671 research should focus more on evidence gaps in the mortality and morbidity, and institutional  
30  
31 672 inequities dimensions, and certain subdimensions, such as non-communicable diseases,  
32  
33 673 housing conditions, and physical inactivity, to provide a comprehensive picture of migrant  
34  
35 674 health in Malaysia. Apart from demonstrating the research gaps, this paper also makes  
36  
37 675 methodological contributions to migrant health research by providing a modified JBI toolkit  
38  
39 676 and a decision tree that identifies the type of study design and corresponding level of  
40  
41 677 evidence, both of which can be utilised in other research fields as well.  
42  
43  
44  
45  
46  
47  
48  
49  
50  
51  
52  
53  
54  
55  
56  
57  
58  
59  
60

## References

**678 Acknowledgements:**

679 We would like to thank Andrew Seko for granting us permission on behalf of the Bay Area  
680 Regional Health Inequities Initiative (BARHII) for the use of their public health framework  
681 in this scoping review. We would also like to thank Norhayati Binti Yahya for providing us  
682 with the definition for non-citizens on behalf of the Department of Statistics Malaysia  
683 (DOSM). Furthermore, we would like to thank the editor and four independent reviewers for  
684 their helpful feedback. Lastly, we would like to thank the United Nations University –  
685 International Institute for Global Health (UNU-IIGH) for its continuous support throughout  
686 this project.

**687 Consent for publication:**

688 Consent regarding the use of the BARHII framework was granted by BARHII.

**689 Copyright/license for publication:**

690 The Corresponding Author has the right to grant on behalf of all authors and does grant on  
691 behalf of all authors, a worldwide licence to the Publishers and its licensees in perpetuity, in  
692 all forms, formats and media (whether known now or created in the future) to i) publish,  
693 reproduce, distribute, display and store the Contribution, ii) translate the Contribution into  
694 other languages, create adaptations, reprints, include within collections and create summaries,  
695 extracts and/or, abstracts of the Contribution, iii) create any other derivative work(s) based on  
696 the Contribution, iv) to exploit all subsidiary rights in the Contribution, v) the inclusion of  
697 electronic links from the Contribution to third party material where-ever it may be located;  
698 and, vi) licence any third party to do any or all of the above.

**699 Competing interests:**

700 All authors have completed the Unified Competing Interest form (available on request from  
701 the corresponding author) and declare: no support from any organisation for the submitted

## References

1  
2  
3 702 work; no financial relationships with any organisations that might have an interest in the  
4  
5 703 submitted work in the previous three years; no other relationships or activities that could  
6  
7  
8 704 appear to have influenced the submitted work.  
9

10  
11 705 **Contributors:**

12  
13  
14 706 AWS, NSP, MV and ZXC created the study protocol. AWS and ZXC conducted abstract and  
15  
16 707 full-text screening, and NSP solved undisputed conflicts. AWS extracted the data, drafted the  
17  
18 708 decision tree, and modified the JBI tools, and NSP, MV, ZXC and CAL provided feedback  
19  
20 709 during these processes. CAL and AWS conducted the data analysis. AWS drafted the initial  
21  
22  
23 710 version of the manuscript and AWS, NSP, MV, CAL, TL and ZXC critically revised and  
24  
25 711 approved the final version.  
26

27  
28 712 **Transparency declaration:**

29  
30  
31 713 This manuscript is an honest, accurate, and transparent account of the study being reported.  
32  
33 714 No important aspects of the study have been omitted, and any discrepancies from the study as  
34  
35  
36 715 planned have been explained.  
37

38  
39 716 **Ethical approval:**

40  
41  
42 717 No ethics and consent were required for this scoping review.  
43

44  
45 718 **Funding:**

46  
47  
48 719 None.  
49

50  
51 720 **Role of the study sponsors:**

52  
53  
54 721 N/A  
55

56  
57 722 **Statement of independence of researchers from funders:**

58  
59  
60 723 N/A

## References

1  
2  
3 724 **Trial registration details:**  
4

5  
6 725 N/A  
7

8  
9 726 **Patient consent:**  
10

11  
12 727 Not required.  
13

14  
15 728 **Data sharing:**  
16

17  
18 729 The pre-review protocol and modified JBI checklists can be accessed on request from the  
19  
20 730 first author.  
21

22  
23 731 **Figure legends:**  
24

25  
26 732 Figure 1. Bay Area Regional Health Inequities Initiative (BARHII) framework.  
27

28  
29 733 Figure 2. Decision tree to identify the type of study design and corresponding level of  
30  
31 734 evidence.  
32

33  
34 735 Figure 3. Flowchart of the data selection process.  
35

36  
37 736 Figure 4. Number of studies disaggregated by health dimension.  
38

39  
40 737 Figure 5. Number of studies disaggregated by type of migrant.  
41

42  
43 738 Figure 6. Number of studies disaggregated by research design.  
44

45  
46 739 Figure 7. Results of the multiple-correspondence analysis (MCA).  
47  
48  
49  
50  
51  
52  
53  
54  
55  
56  
57  
58  
59  
60

## References

740 **References**

- 741 1. International Organization for Migration. World migration report 2020. Geneva:  
742 International Organization for Migration 2019.
- 743 2. International Organization for Migration. Malaysia [Internet]. Kuala Lumpur:  
744 International Organization for Migration; 2020 [cited 2020 Oct 01]. Available from:  
745 <https://www.iom.int/countries/malaysia>
- 746 3. Department of Statistics Malaysia. Population quick info [Internet]. Putrajaya:  
747 Department of Statistics Malaysia; 2020 [updated 2020 Apr 30; cited 2020 Apr 30].  
748 Available from:  
749 [https://www.dosm.gov.my/v1/index.php?r=column/cone&menu\\_id=b2RVUmEyZ2ZZ](https://www.dosm.gov.my/v1/index.php?r=column/cone&menu_id=b2RVUmEyZ2ZZYXhaUzUrdnpsaWozdz09)  
750 [YXhaUzUrdnpsaWozdz09](https://www.dosm.gov.my/v1/index.php?r=column/cone&menu_id=b2RVUmEyZ2ZZYXhaUzUrdnpsaWozdz09)
- 751 4. Department of Statistics Malaysia. Current population estimates Malaysia 2019.  
752 Putrajaya: Department of Statistics Malaysia.
- 753 5. Office of the United Nations High Commissioner for Human Rights. The rights of non-  
754 citizens. Geneva: United Nations 2006.
- 755 6. International Organization for Migration. Glossary on migration. 2<sup>nd</sup> ed. Geneva:  
756 International Organization for Migration 2011.
- 757 7. Ministry of Home Affairs Malaysia. Statistik pekerja asing terkini mengikut negeri dan  
758 sektor [Internet]. Putrajaya: Ministry of Home Affairs Malaysia; 2019 [updated 2019  
759 Aug 1; cited 2020 Apr 14]. Available from:

## References

- 1  
2  
3 760 [http://www.data.gov.my/data/ms\\_MY/dataset/statistik-pekerja-asing-terkini-mengikut-](http://www.data.gov.my/data/ms_MY/dataset/statistik-pekerja-asing-terkini-mengikut-)  
4  
5 761 [negeri-dan-sektor](http://www.data.gov.my/data/ms_MY/dataset/statistik-pekerja-asing-terkini-mengikut-negeri-dan-sektor)  
6  
7  
8  
9 762 8. United Nations High Commissioner for Refugees. Figures at a glance in Malaysia  
10  
11 763 [Internet]. Kuala Lumpur: United Nations High Commissioner for Refugees; 2019  
12  
13 764 [cited 2019 Nov 20]. Available from: [https://www.unhcr.org/en-my/figures-at-a-](https://www.unhcr.org/en-my/figures-at-a-glance-in-malaysia.html)  
14  
15 765 [glance-in-malaysia.html](https://www.unhcr.org/en-my/figures-at-a-glance-in-malaysia.html)  
16  
17  
18  
19 766 9. Chuah FL, Tan ST, Yeo J, Legido-Quigley H. The health needs and access barriers  
20  
21 767 among refugees and asylum-seekers in Malaysia: a qualitative study. International  
22  
23 768 Journal for Equity in Health. 2018 Dec 1;17(1):120.  
24  
25  
26  
27 769 10. Devadason ES, Meng CW. Policies and laws regulating migrant workers in Malaysia:  
28  
29 770 A critical appraisal. Journal of Contemporary Asia. 2014 Jan 2;44(1):19-35.  
30  
31  
32  
33 771 11. International Organization for Migration. IOM handbook: protection and assistance for  
34  
35 772 migrants vulnerable to violence, exploitation and abuse. Geneva: International  
36  
37 773 Organization for Migration 2018.  
38  
39  
40  
41 774 12. Pocock NS, Suphanchaimat R, Chan CK, Faller EM, Harrigan N, Pillai V, Wickramage  
42  
43 775 K. Reflections on migrant and refugee health in Malaysia and the ASEAN region.  
44  
45 776 BMC Proceedings. 2018 Apr;12(Suppl 4):4.  
46  
47  
48  
49 777 13. Lasimbang HB, Tong WT, Low WY. Migrant workers in Sabah, East Malaysia: The  
50  
51 778 importance of legislation and policy to uphold equity on sexual and reproductive health  
52  
53 779 and rights. Best Practice & Research Clinical Obstetrics & Gynaecology. 2016 Apr  
54  
55 780 1;32:113-23.  
56  
57  
58  
59  
60

## References

- 1  
2  
3 781 14. Sweileh WM, Wickramage K, Pottie K, Hui C, Roberts B, Sawalha AF, Zyoud SH.  
4  
5 782 Bibliometric analysis of global migration health research in peer-reviewed literature  
6  
7 783 (2000–2016). *BMC Public Health*. 2018 Dec;18(1):777.  
8  
9  
10  
11 784 15. Villarroel N, Hannigan A, Severoni S, Puthoopparambil S, MacFarlane A. Migrant  
12  
13 785 health research in the Republic of Ireland: a scoping review. *BMC Public Health*. 2019  
14  
15 786 Dec;19(1):324.  
16  
17  
18  
19 787 16. Khanlou N, Haque N, Skinner A, Mantini A, Kurtz Landy C. Scoping review on  
20  
21 788 maternal health among immigrant and refugee women in Canada: prenatal, intrapartum,  
22  
23 789 and postnatal care. *Journal of Pregnancy* 2017 Jan;2017:1-14  
24  
25  
26  
27 790 17. Tricco AC, Lillie E, Zarin W, O'Brien KK, Colquhoun H, Levac D, Moher D, Peters  
28  
29 791 MD, Horsley T, Weeks L, Hempel S. PRISMA extension for scoping reviews  
30  
31 792 (PRISMA-ScR): Checklist and explanation. *Annals of Internal Medicine*. 2018 Oct  
32  
33 793 2;169(7):467-73.  
34  
35  
36  
37  
38 794 18. Bay Area Regional Health Inequities Initiative. Framework [Internet]. Oakland, CA:  
39  
40 795 Bay Area Regional Health Inequities Initiative; 2015 [cited 2019 Sep 18]. Available  
41  
42 796 from: <http://barhii.org/framework/>  
43  
44  
45  
46 797 19. Aromataris E, Munn Z, editors. *Joanna Briggs Institute Reviewer's Manual*. Joanna  
47  
48 798 Briggs Institute, 2017. Available from:  
49  
50 799 <https://wiki.joannabriggs.org/display/MANUAL/JBI+Reviewer%27s+Manual>  
51  
52  
53  
54 800 20. National Academies of Sciences, Engineering, and Medicine. *A framework for*  
55  
56 801 *educating health professionals to address the social determinants of health*.  
57  
58 802 Washington, DC: The National Academies Press 2016.  
59  
60



## References

- 1  
2  
3 803 21. Public Health England. Public Health Outcomes Framework 2019/20: a consultation.  
4  
5 804 London: Public Health England 2019.  
6  
7  
8  
9 805 22. London School of Hygiene & Tropical Medicine. *Which databases should I search? A*  
10  
11 806 *guide to the most popular resources*. London: London School of Hygiene & Tropical  
12  
13 807 Medicine 2014.  
14  
15  
16  
17 808 23. Bramer WM, Rethlefsen ML, Kleijnen J, Franco OH. Optimal database combinations  
18  
19 809 for literature searches in systematic reviews: a prospective exploratory study.  
20  
21 810 Systematic Reviews. 2017 Dec 1;6(1):245.  
22  
23  
24  
25 811 24. Centre for Evidence-Based Medicine. Study designs. Oxford: Centre for Evidence-  
26  
27 812 Based Medicine; 2019 [cited 2019 Oct 10]. Available from:  
28  
29 813 <https://www.cebm.net/2014/04/study-designs/>  
30  
31  
32  
33 814 25. Centre for Cognitive Ageing and Cognitive Epidemiology. Systematic reviews and  
34  
35 815 meta-analyses: A step-by-step guide. Edinburgh: Centre for Cognitive Ageing and  
36  
37 816 Cognitive Epidemiology; 2013 [cited 2019 Oct 15]. Available from:  
38  
39 817 [https://www.ccace.ed.ac.uk/research/software-resources/systematic-reviews-and-meta-](https://www.ccace.ed.ac.uk/research/software-resources/systematic-reviews-and-meta-analyses)  
40  
41 818 [analyses](https://www.ccace.ed.ac.uk/research/software-resources/systematic-reviews-and-meta-analyses)  
42  
43  
44  
45  
46 819 26. Alexander LK, Lopes B, Ricchetti-Masterson K, Yeatts KB. *ERIC notebook* [2<sup>nd</sup> ed].  
47  
48 820 Chapel Hill: Epidemiologic Research and Information Center, 2015.  
49  
50  
51  
52 821 27. Cochrane Community. Glossary. London: Cochrane Community; 2019 [cited 2019 Nov  
53  
54 822 2]. Available from: <https://community.cochrane.org/glossary#letter-N>  
55  
56  
57  
58 823 28. Peacock JL, Peacock PJ. *Oxford Handbook of Medical Statistics*. Oxford: Oxford  
59  
60 824 University Press 2011.

## References

- 1  
2  
3 825 29. Tomlin G, Borgetto B. Research pyramid: A new evidence-based practice model for  
4  
5 826 occupational therapy. *American Journal of Occupational Therapy*. 2011 Mar  
6  
7 827 1;65(2):189-96.  
8  
9  
10  
11 828 30. Moola S, Munn Z, Tufanaru C, Aromataris E, Sears K, Sfetcu R, Currie M, Lisy K,  
12  
13 829 Qureshi R, Mattis P, Mu P. Chapter 7: Systematic reviews of etiology and risk. In:  
14  
15 830 Aromataris E, Munn Z (Editors). *JBIM Manual for Evidence Synthesis*. JBI, 2017.  
16  
17 831 Available from: <https://doi.org/10.46658/JBIMES-20-08>  
18  
19  
20 832 31. Greenacre M. *Correspondence analysis in practice*. 2<sup>nd</sup> ed. Boca Raton, FL: Chapman  
21  
22 833 & Hall/CRC 2007.  
23  
24  
25  
26 834 32. Le Roux B, Rouanet H. *Multiple correspondence analysis*. London: Sage 2010.  
27  
28  
29  
30 835 33. Scheutz F, Heidmann J, Poulsen S. Dental health of Vietnamese boat people on Pulau  
31  
32 836 Bidong, Malaysia. *Community Dentistry and Oral Epidemiology*. 1983 Aug;11(4):255-  
33  
34 837 8.  
35  
36  
37  
38 838 34. Levy J. Epidemiological survey of intestinal parasitic infections in children of Sabah,  
39  
40 839 Malaysia. *Journal of Public Health*. 1988 Aug 1;10(3):240-9.  
41  
42  
43  
44 840 35. Kassim MS, George R, Kassim K, Begum M, Cherian MP, Tajudin AK, Chandran V,  
45  
46 841 Anan A, Reddy R, Singh J. Child abuse and neglect as seen in General Hospital, Kuala  
47  
48 842 Lumpur – A two year study. *The Medical Journal of Malaysia*. 1989 Jun;44(2):111-21.  
49  
50  
51  
52 843 36. Zulkifli SN, U KM, Yusof K, Lin WY. Maternal and child health in urban Sabah,  
53  
54 844 Malaysia: a comparison of citizens and migrants. *Asia Pacific Journal of Public Health*.  
55  
56 845 1994 Jul;7(3):151-8.  
57  
58  
59  
60

## References

- 1  
2  
3 846 37. Rajeswari B, Sinniah B, Hussein H. Socio-economic factors associated with intestinal  
4  
5 847 parasites among children living in Gombak, Malaysia. *Asia Pacific Journal of Public*  
6  
7 848 *Health*. 1994 Jan 1;21:5.
- 9  
10  
11 849 38. Jeyakumar D. Thiamine responsive ankle oedema in detention centre inmates. *The*  
12  
13 850 *Medical Journal of Malaysia*. 1995 Mar;50(1):17-20.
- 15  
16  
17 851 39. Jamaiah I, Anuar AK, Najib NA, Zurainee MN. Imported malaria: a retrospective study  
18  
19 852 in University Hospital, Kuala Lumpur, a ten-year experience. *Medical Journal of*  
20  
21 853 *Malaysia*. 1998;53(1):6-9.
- 23  
24  
25 854 40. Krahl W, Hashim A. Psychiatric disorders in ASEAN-migrants in Malaysia – A  
26  
27 855 university hospital experience. *The Medical Journal of Malaysia*. 1998 Sep;53(3):232-  
28  
29 856 8.
- 31  
32  
33 857 41. Zabedah MY, Razak M, Zakiah I, Zuraidah AB. Profile of solvent abusers (glue  
34  
35 858 sniffers) in East Malaysia. *The Malaysian Journal of Pathology*. 2001 Dec;23(2):105-9.
- 37  
38  
39 859 42. Dony JF, Ahmad J, Tiong YK. Epidemiology of tuberculosis and leprosy, Sabah,  
40  
41 860 *Malaysia*. *Tuberculosis*. 2004 Jan 1;84(1-2):8-18.
- 43  
44  
45 861 43. Chandran PA, Jayaram G, Mahmud R, Anuar AK. Microfilaria in hydrocele fluid  
46  
47 862 cytology. *The Malaysian Journal of Pathology*. 2004 Dec;26(2):119-23.
- 49  
50  
51 863 44. Nissapatorn V, Lim YA, Jamaiah I, Agnes LS, Amyliana K, Wen CC, Nurul H, Nizam  
52  
53 864 S, Quake CT, Valartmathi C, Woei CY. Parasitic infections in Malaysia: Changing and  
54  
55 865 challenges. *Southeast Asian Journal of Tropical Medicine and Public Health*.  
56  
57 866 2005;36:50-9.

## References

- 1  
2  
3 867 45. Sobri M, Merican JS, Nordiyana M, Valarmathi S, Al-Edrus SA. Neuroimaging  
4  
5 868 features of tuberculous meningitis. *Medical Journal of Malaysia*. 2006 Mar;61(1):36-  
6  
7  
8 869 40.
- 9  
10  
11 870 46. Leong CC. Pre-employment medical examination of Indonesian domestic helpers in a  
12  
13 871 private clinic in Johor Bahru – An eight year review. *Medical Journal of Malaysia*.  
14  
15 872 2006 Dec;61(5):592.
- 16  
17  
18  
19 873 47. Sasidharan S, Uyub AM, Azlan AA. Further evidence of ethnic and gender differences  
20  
21 874 for *Helicobacter pylori* infection among endoscoped patients. *Transactions of the Royal*  
22  
23 875 *Society of Tropical Medicine and Hygiene*. 2008 Dec 1;102(12):1226-32.
- 24  
25  
26  
27 876 48. Masitah M. Malaria among foreign workers in Selangor, Malaysia. *Journal of Health*  
28  
29 877 *and Translational Medicine*. 2008 Dec 28;11(2):53-8.
- 30  
31  
32  
33 878 49. Shailendra S, Prepageran N. Oropharyngeal rhinosporidiosis in a migrant worker: A  
34  
35 879 delayed presentation. *Medical Journal of Malaysia*. 2008 Mar;63(1):65.
- 36  
37  
38  
39 880 50. Chan BT, Amal RN, Noor Hayati MI, Kino H, Anisah N, Norhayati M, Sulaiman O,  
40  
41 881 Mohammed Abdullah M, Fatmah MS, Roslida AR, Ismail G. Seroprevalence of  
42  
43 882 toxoplasmosis among migrant workers from different Asian countries working in  
44  
45 883 Malaysia. *Southeast Asian Journal of Tropical Medicine and Public Health*. 2008  
46  
47 884 Jan;39(1):9.
- 48  
49  
50  
51 885 51. Farhana F, Jamaiah I, Rohela M, Abdul-Aziz NM, Nissapatorn V. A ten year (1999-  
52  
53 886 2008) retrospective study of amoebiasis in University Malaya Medical Centre  
54  
55 887 (UMMC), Kuala Lumpur, Malaysia. *Tropical Biomedicine*. 2009 Dec 1;26:262-6.
- 56  
57  
58  
59  
60

## References

- 1  
2  
3 888 52. Chan BT, Amal RN, Noor Hayati MI, Kino H, Anisah N, Norhayati M. Comparative  
4  
5 889 study of seroprevalence of toxoplasmosis between local workers and migrant workers  
6  
7 890 in Malaysia. *Archives of Medical Science*. 2009 Apr 1;5(2):255.
- 8  
9  
10  
11 891 53. Murty OP. Cystic tumor of papillary muscle of heart: A rare finding in sudden death.  
12  
13 892 *The American Journal of Forensic Medicine and Pathology*. 2009 Jun 1;30(2):201-3.
- 14  
15  
16  
17 893 54. Murty OP, Kian CK, Husin MH, Yusuf WY. Fatal lightning strikes in Malaysia: A  
18  
19 894 review of 27 fatalities. *The American Journal of Forensic Medicine and Pathology*.  
20  
21 895 2009 Sep 1;30(3):246-51.
- 22  
23  
24  
25 896 55. Mustafa B, Hani AW, Mariam M, Khairul AH, Abdul Rasid K. Epidemiological and  
26  
27 897 clinical features of dengue versus other acute febrile illnesses amongst patients seen at  
28  
29 898 government polyclinics. *Medical Journal of Malaysia*. 2010 Dec 1;65(4):291-6.
- 30  
31  
32  
33 899 56. Su TA, Hoe VC, Masilamani R, Mahmud AB. Hand-arm vibration syndrome among a  
34  
35 900 group of construction workers in Malaysia. *Occupational and Environmental Medicine*.  
36  
37 901 2011 Jan 1;68(1):58-63.
- 38  
39  
40  
41 902 57. Daher AM, Ibrahim HS, Daher TM, k Anbori A. Health related quality of life among  
42  
43 903 Iraqi immigrants settled in Malaysia. *BMC Public Health*. 2011 Dec 1;11(1):407.
- 44  
45  
46  
47 904 58. Ratnasingam J, Ioras F, Ishak MK. Migrant contract workers and occupational  
48  
49 905 accidents in the furniture industry. *Journal of Applied Sciences*. 2011 Dec;11(14):2646-  
50  
51 906 51.
- 52  
53  
54  
55 907 59. Ab Rahman AK, Abdullah FH. Visceral leishmaniasis (kala-azar) and malaria  
56  
57 908 coinfection in an immigrant in the state of Terengganu, Malaysia: A case report.  
58  
59 909 *Journal of Microbiology, Immunology and Infection*. 2011 Feb 1;44(1):72-6.

## References

- 1  
2  
3 910 60. Taib T, Baba R. Clinical characteristics of patients with leprosy in Hospital Kuala  
4  
5 911 Lumpur. *Malaysian Journal of Dermatology*. 2013 Jan 1;31:30-6.  
6  
7  
8  
9 912 61. Osman MT, Al-Naggar RA, Taha BI. Knowledge and awareness of cervical cancer  
10  
11 913 screening among Iraqi immigrant women living in Malaysia. *World Journal of Medical*  
12  
13 914 *Sciences*. 2013;8(2):123-9.  
15  
16  
17 915 62. Minhat HS, Mustafa J, Sarabi S. Sociodemographic determinants of knowledge on  
18  
19 916 HPV vaccination among Iranian women living in Malaysia. *Academic Journal of*  
20  
21 917 *Cancer Research*. 2013;6(1):8-12.  
23  
24  
25 918 63. Mendelsohn JB, Rhodes T, Spiegel P, Schilperoord M, Burton JW, Balasundaram S,  
26  
27 919 Wong C, Ross DA. Bounded agency in humanitarian settings: A qualitative study of  
28  
29 920 adherence to antiretroviral therapy among refugees situated in Kenya and Malaysia.  
30  
31 921 *Social Science & Medicine*. 2014 Nov 1;120:387-95.  
33  
34  
35 922 64. Mendelsohn JB, Schilperoord M, Spiegel P, Balasundaram S, Radhakrishnan A, Lee  
36  
37 923 CK, Larke N, Grant AD, Sondorp E, Ross DA. Is forced migration a barrier to  
38  
39 924 treatment success? Similar HIV treatment outcomes among refugees and a surrounding  
40  
41 925 host community in Kuala Lumpur, Malaysia. *AIDS and Behavior*. 2014 Feb  
42  
43 926 1;18(2):323-34.  
44  
45  
46  
47  
48 927 65. Kwan Z, Pailoor J, Tan LL, Robinson S, Wong SM, Ismail R. Leprosy: An imported  
49  
50 928 disease. *Leprosy Review*. 2014 Sep 1;85(3):170-6.  
51  
52  
53  
54 929 66. Santos A, Ramos HM, Ramasamy G, Fernandes C. Prevalence of musculoskeletal pain  
55  
56 930 in a sample of migrant workers in the manufacturing industry in Malaysia. *Public*  
57  
58 931 *Health*. 2014 Aug;128(8):759.  
59  
60

## References

- 1  
2  
3 932 67. Razali S, Salleh RI, Yahya B, Ahmad SH. Maternal filicide among women admitted to  
4  
5 933 forensic psychiatric institutions in Malaysia: Case series. *East Asian Archives of*  
6  
7 934 *Psychiatry*. 2015 Jun;25(2):79.
- 8  
9  
10  
11 935 68. Elmi OS, Hasan H, Abdullah S, Jeab MZ, Alwi ZB, Naing NN. Multidrug-resistant  
12  
13 936 tuberculosis and risk factors associated with its development: A retrospective study.  
14  
15 937 *The Journal of Infection in Developing Countries*. 2015 Oct 29;9(10):1076-85.
- 16  
17  
18  
19 938 69. Santos A, Ramos HM, Ramasamy G, Fernandes C. Musculoskeletal pain among  
20  
21 939 migrant workers in the Malaysian manufacturing industry: the impact of the physical  
22  
23 940 environment, workload and work patterns. *Pertanika Journal of Social Sciences &*  
24  
25 941 *Humanities*. 2015 Jun 1;23:315-24.
- 26  
27  
28  
29 942 70. William T, Parameswaran U, Lee WK, Yeo TW, Anstey NM, Ralph AP. Pulmonary  
30  
31 943 tuberculosis in outpatients in Sabah, Malaysia: Advanced disease but low incidence of  
32  
33 944 HIV co-infection. *BMC Infectious Diseases*. 2015 Dec 1;15(1):32.
- 34  
35  
36  
37 945 71. Siah PC, Lee WY, Goh LY. Quality of life among refugee children in Malaysia – A  
38  
39 946 brief report. *Vulnerable Children and Youth Studies*. 2015 Oct 2;10(4):294-9.
- 40  
41  
42  
43 947 72. Guinto RL, Curran UZ, Suphanchaimat R, Pocock NS. Universal health coverage in  
44  
45 948 ‘One ASEAN’: Are migrants included? *Global Health Action*. 2015 Dec 1;8(1):25749.
- 46  
47  
48  
49 949 73. Vijian K, Tata MD, Palayan K. Comparison of features and outcomes of perforated  
50  
51 950 peptic ulcer between Malaysians and foreigners. *Medical Journal of Malaysia*. 2016  
52  
53 951 Feb 1;71(1):13.
- 54  
55  
56  
57 952 74. Azian MN, Hakim SL, Khadri MS, Yusri MY, Adela JI, Noor M, Nurhainis OS,  
58  
59 953 Karnan G, Shamilah H. Leishmaniasis in Peninsular Malaysia: The role of immigrant

## References

- 1  
2  
3 954 workers and the vector. *Southeast Asian Journal of Tropical Medicine and Public*  
4  
5 955 *Health*. 2016 Jul 1;47(4):607-16.  
6  
7  
8  
9 956 75. Sahimin N, Lim YA, Ariffin F, Behnke JM, Lewis JW, Zain SN. Migrant workers in  
10  
11 957 Malaysia: Current implications of sociodemographic and environmental characteristics  
12  
13 958 in the transmission of intestinal parasitic infections. *PLoS Neglected Tropical Diseases*.  
14  
15 959 2016 Nov;10(11).  
16  
17  
18  
19 960 76. Noh NA, Wahab HA, Bakar Ah SH, Islam MR. Public health services for foreign  
20  
21 961 workers in Malaysia. *Social Work in Public Health*. 2016 Jul 28;31(5):419-30.  
22  
23  
24  
25 962 77. Kamaludin NA, How V. The inequality of environmental health awareness among  
26  
27 963 foreign immigrants and local blue-collar workers in Kuala Lumpur, Malaysia.  
28  
29 964 *Environmental Justice*. 2016 Dec 1;9(6):181-7.  
30  
31  
32  
33 965 78. Min NN, Vasudevan SK, Jasman AA, Aisyahbinti A, Myint KT. Work-related ocular  
34  
35 966 injuries in Johor Bahru, Malaysia. *International Eye Science*. 2016;16(3):416-22.  
36  
37  
38  
39 967 79. Woh PY, Thong KL, Behnke JM, Lewis JW, Zain SN. Characterization of  
40  
41 968 nontyphoidal *Salmonella* isolates from asymptomatic migrant food handlers in  
42  
43 969 Peninsular Malaysia. *Journal of Food Protection*. 2017 Aug;80(8):1378-83.  
44  
45  
46  
47 970 80. Tanabe M, Myers A, Bhandari P, Cornier N, Doraiswamy S, Krause S. Family  
48  
49 971 planning in refugee settings: Findings and actions from a multi-country study. *Conflict*  
50  
51 972 *and Health*. 2017 Dec;11(1):9.  
52  
53  
54  
55 973 81. Ratnalingam V, Umapathy T, Sumugam K, Hanafi H, Retnasabapathy S. Microbial  
56  
57 974 keratitis in West and East Malaysia. *Internal Eye Science*. 2017;17(11):1989-92.  
58  
59  
60



## References

- 1  
2  
3 975 82. Woh PY, Thong KL, Lim YA, Behnke JM, Lewis JW, Mohd Zain SN. Microorganisms  
4  
5 976 as an indicator of hygiene status among migrant food handlers in Peninsular Malaysia.  
6  
7 977 Asia Pacific Journal of Public Health. 2017 Oct;29(7):599-607.  
8  
9  
10  
11 978 83. Noor NM, Shaker MN. Perceived workplace discrimination, coping and psychological  
12  
13 979 distress among unskilled Indonesian migrant workers in Malaysia. International Journal  
14  
15 980 of Intercultural Relations. 2017 Mar 1;57:19-29.  
16  
17  
18  
19 981 84. Noordin R, Mohd Zain SN, Yunus MH, Sahimin N. Seroprevalence of lymphatic  
20  
21 982 filariasis among migrant workers in Peninsular Malaysia. Transactions of The Royal  
22  
23 983 Society of Tropical Medicine and Hygiene. 2017 Aug 1;111(8):370-2.  
24  
25  
26  
27 984 85. Sahimin N, Lim YA, Ariffin F, Behnke JM, Basáñez MG, Walker M, Lewis JW,  
28  
29 985 Noordin R, Abdullah KA, Zain SN. Socio-demographic determinants of *Toxoplasma*  
30  
31 986 *gondii* seroprevalence in migrant workers of Peninsular Malaysia. Parasites & Vectors.  
32  
33 987 2017 Dec 1;10(1):238.  
34  
35  
36  
37  
38 988 86. Labao HC, Faller EM, Bacayo MF. 'Aches and pains' of Filipino migrant workers in  
39  
40 989 Malaysia: A profile of work-related musculoskeletal disorders. Annals of Global  
41  
42 990 Health. 2018;84(3):474.  
43  
44  
45  
46 991 87. Shaw SA, Ward KP, Pillai V, Hinton DE. A group mental health randomized controlled  
47  
48 992 trial for female refugees in Malaysia. American Journal of Orthopsychiatry. 2018 Jul  
49  
50 993 23.  
51  
52  
53  
54 994 88. Rahman SA, Jeffree MS, Kamaludin F, Din IA, Yusof M, Ahmed K. Beriberi outbreak  
55  
56 995 among unauthorised immigrants in a detention camp in Malaysia. Journal of Immigrant  
57  
58 996 and Minority Health. 2018 Oct 1;20(5):1294-7.  
59  
60

## References

- 1  
2  
3 997 89. Sahimin N, Douadi B, Lim AL, Behnke JM, Zain SN. Distribution of *Giardia*  
4  
5 998 *duodenalis* (Assemblages A and B) and *Cryptosporidium parvum* amongst migrant  
6  
7 999 workers in Peninsular Malaysia. *Acta Tropica*. 2018 Jun 1;182:178-84.  
8  
9  
10  
11 1000 90. Nwabichie CC, Manaf RA, Ismail SB. Factors affecting uptake of cervical cancer  
12  
13 1001 screening among African women in Klang Valley, Malaysia. *Asian Pacific Journal of*  
14  
15 1002 *Cancer Prevention*. 2018;19(3):825.  
16  
17  
18  
19 1003 91. Jeffree SM, Ahmed K, Safian N, Hassan R, Mihat O, Lukman KA, Shamsudin SB,  
20  
21 1004 Kamaludin F. *Falciparum* malaria outbreak in Sabah linked to an immigrant rubber  
22  
23 1005 tapper. *The American Journal of Tropical Medicine and Hygiene*. 2018 Jan  
24  
25 1006 10;98(1):45-50.  
26  
27  
28  
29  
30 1007 92. Zerguine H, Tamrin SB, Jalaludin J. Prevalence, source and severity of work-related  
31  
32 1008 injuries among “foreign” construction workers in a large Malaysian organisation: A  
33  
34 1009 cross-sectional study. *Industrial Health*. 2018:2017-0205.  
35  
36  
37  
38 1010 93. Ya’acob NA, Abidin EZ, Rasdi I, Rahman AA, Ismail S. Reducing work-related  
39  
40 1011 musculoskeletal symptoms through implementation of Kiken Yochi training  
41  
42 1012 intervention approach. *Work*. 2018 Jan 1;60(1):143-52.  
43  
44  
45  
46 1013 94. Loganathan T, Rui D, Ng CW, Pocock NS. Breaking down the barriers: Understanding  
47  
48 1014 migrant workers’ access to healthcare in Malaysia. *PloS one*. 2019;14(7).  
49  
50  
51  
52 1015 95. Rahman MM, Arif MT, Safii R, Tambi Z, Akoi C, Jantan Z, Halim SA. Care seeking  
53  
54 1016 behaviour of Bangladeshi migrant workers in Sarawak, Malaysia. *Bangladesh Medical*  
55  
56 1017 *Research Council Bulletin*. 2019 Jun 15;45(1):47-53.  
57  
58  
59  
60

## References

- 1  
2  
3 1018 96. Siah PC, Low SK, Lee WY, Lim YY, Tan JT. Discrimination perceived by child  
4  
5 1019 refugees in Malaysia: from the views of representatives from refugees' community  
6  
7 1020 service centres and non-government service. *Vulnerable Children and Youth Studies*.  
8  
9 1021 2019 Sep 1:1-4.  
10  
11  
12  
13 1022 97. Sahimin N, Lim YA, Noordin R, Yunus MH, Arifin N, Behnke JM, Zain SN.  
14  
15 1023 Epidemiology and immunodiagnostics of *Strongyloides stercoralis* infections among  
16  
17 1024 migrant workers in Malaysia. *Asian Pacific Journal of Tropical Medicine*. 2019 Jun  
18  
19 1025 1;12(6):250.  
20  
21  
22  
23  
24 1026 98. Chuah FL, Tan ST, Yeo J, Legido-Quigley H. Health system responses to the health  
25  
26 1027 needs of refugees and asylum-seekers in Malaysia: A qualitative study. *International*  
27  
28 1028 *Journal of Environmental Research and Public Health*. 2019 Jan;16(9):1584.  
29  
30  
31  
32 1029 99. Vearey J, Orcutt M, Gostin L, Braham CA, Duigan P. Building alliances for the global  
33  
34 1030 governance of migration and health. *BMJ*. 2019 Sep 16;366:14143.  
35  
36  
37  
38 1031 100. World Health Organization Regional Office for Europe. Strategy and action plan for  
39  
40 1032 refugee and migrant health in the WHO European Region. Copenhagen: World Health  
41  
42 1033 Organization Regional Office for Europe 2016.  
43  
44  
45  
46 1034 101. Reidpath DD, Allotey P. Infant mortality rate as an indicator of population health.  
47  
48 1035 *Journal of Epidemiology & Community Health*. 2003 May 1;57(5):344-6.  
49  
50  
51  
52 1036 102. Vijayasingham L, Rhule E, Asgari-Jirhandeh N, Allotey P. Restrictive migration  
53  
54 1037 policies in low-income and middle-income countries. *The Lancet Global Health*. 2019  
55  
56 1038 Jul 1;7(7):e843-4.  
57  
58  
59  
60

## References

- 1  
2  
3 1039 103. Juárez SP, Honkaniemi H, Dunlavy AC, Aldridge RW, Barreto ML, Katikireddi SV,  
4  
5 1040 Rostila M. Effects of non-health-targeted policies on migrant health: A systematic  
6  
7 1041 review and meta-analysis. *The Lancet Global Health*. 2019 Apr 1;7(4):e420-35.  
8  
9  
10  
11 1042 104. Shao C, Meng X, Cui S, Wang J, Li C. Income-related health inequality of migrant  
12  
13 1043 workers in China and its decomposition: An analysis based on the 2012 China labor-  
14  
15 1044 force dynamics survey data. *Journal of the Chinese Medical Association*. 2016 Oct  
16  
17 1045 1;79(10):531-7.  
18  
19  
20  
21 1046 105. He X, Wong DF. A comparison of female migrant workers' mental health in four cities  
22  
23 1047 in China. *International Journal of Social Psychiatry*. 2013 Mar;59(2):114-22.  
24  
25  
26  
27 1048 106. Al-Khatib IA, Ju'ba A, Kamal N, Hamed N, Hmeidan N, Massad S. Impact of housing  
28  
29 1049 conditions on the health of the people at al-Ama'ri refugee camp in the West Bank of  
30  
31 1050 Palestine. *International Journal of Environmental Health Research*. 2003 Dec  
32  
33 1051 1;13(4):315-26.  
34  
35  
36  
37 1052 107. Mutalip MH, Mishkin K, Pawai F, Sulaiman J, Yoep N. Factors associated with sexual  
38  
39 1053 intercourse, condom-use, and perceived peer behaviors among adolescents in Malaysia:  
40  
41 1054 A school-based cross-sectional study. *Malaysian Journal of Social Sciences &*  
42  
43 1055 *Humanities*. 2019 May 1;4(2):8-18.  
44  
45  
46  
47 1056 108. Khan MA, Rosly NA, Majeed AB, Ismail NE. Knowledge of modes of HIV  
48  
49 1057 transmission among public secondary school students in urban and rural areas in  
50  
51 1058 Malaysia. *Pakistan Journal of Pharmaceutical Sciences*. 2018 Sep 1;31(5).  
52  
53  
54  
55  
56  
57  
58  
59  
60

## References

- 1  
2  
3 1059 109. Shakir M, Mahavera S, Wong LP, Lim Abdullah K, Adam P. Online STI information  
4  
5 1060 seeking behaviour and condom use intentions among young Facebook users in  
6  
7 1061 Malaysia. Health Promotion International. 2019.
- 8  
9  
10  
11 1062 110. Renzaho AM, Burns C. Post-migration food habits of sub-Saharan African migrants in  
12  
13 1063 Victoria: A cross-sectional study. Nutrition & Dietetics. 2006 Jun;63(2):91-102.
- 14  
15  
16  
17 1064 111. Ganle JK, Amoako D, Baatiema L, Ibrahim M. Risky sexual behaviour and  
18  
19 1065 contraceptive use in contexts of displacement: Insights from a cross-sectional survey of  
20  
21 1066 female adolescent refugees in Ghana. International Journal for Equity in Health. 2019  
22  
23 1067 Dec 1;18(1):127.
- 24  
25  
26  
27 1068 112. Bosdriesz JR, Lichthart N, Witvliet MI, Busschers WB, Stronks K, Kunst AE. Smoking  
28  
29 1069 prevalence among migrants in the US compared to the US-born and the population in  
30  
31 1070 countries of origin. PloS One. 2013;8(3).
- 32  
33  
34  
35 1071 113. Ritchie H, Roser M. Smoking. Oxford: Our World Data; 2019 [updated 2019 Nov;  
36  
37 1072 cited 2019 Nov 20]. Available from: <https://ourworldindata.org/smoking>
- 38  
39  
40  
41 1073 114. Sweileh WM. Global output of research on the health of international migrant workers  
42  
43 1074 from 2000 to 2017. Globalization and Health. 2018 Dec 1;14(1):105.
- 44  
45  
46  
47 1075 115. World Health Organisation. Noncommunicable diseases (NCD) country profiles –  
48  
49 1076 Malaysia. (n.p.): World Health Organisation 2018.
- 50  
51  
52  
53 1077 116. Zimmerman C, Hossain M, Watts C. Human trafficking and health: A conceptual  
54  
55 1078 model to inform policy, intervention and research. Social Science & Medicine. 2011 Jul  
56  
57 1079 1;73(2):327-35.
- 58  
59  
60

## References

- 1  
2  
3 1080 117. Zimmerman C, Kiss L, Hossain M. Migration and health: A framework for 21st century  
4  
5 1081 policy-making. *PloS Medicine*. 2011 May;8(5).  
6  
7  
8  
9 1082 118. Par M, Hassan SA, Uba I, Baba M. Perceived stress among International postgraduate  
10  
11 1083 students in Malaysia. *International Journal of Psychological Studies*. 2015 Dec  
12  
13 1084 1;7(4):1.  
14  
15  
16  
17 1085 119. Kohno A, Farid ND, Musa G, Aziz NA, Nakayama T, Dahlui M. Factors affecting  
18  
19 1086 Japanese retirees' healthcare service utilisation in Malaysia: A qualitative study. *BMJ*  
20  
21 1087 *Open*. 2016 Mar 1;6(3).  
22  
23  
24  
25 1088 120. Asits S, Noorhidayah I, Osman A. Migrasi bermusim: Pengaruhnya terhadap kawalan  
26  
27 1089 malaria di Sabah. *Medical Journal of Malaysia*. 1999;54(2):200-209.  
28  
29  
30  
31 1090 121. World Health Organization. A conceptual framework for action on the social  
32  
33 1091 determinants of health. Geneva: World Health Organization 2010.  
34  
35  
36  
37  
38  
39  
40  
41  
42  
43  
44  
45  
46  
47  
48  
49  
50  
51  
52  
53  
54  
55  
56  
57  
58  
59  
60



Figure 1. Bay Area Regional Health Inequities Initiative (BARHII) framework.



Figure 2. Decision tree to identify the type of study design and corresponding level of evidence.



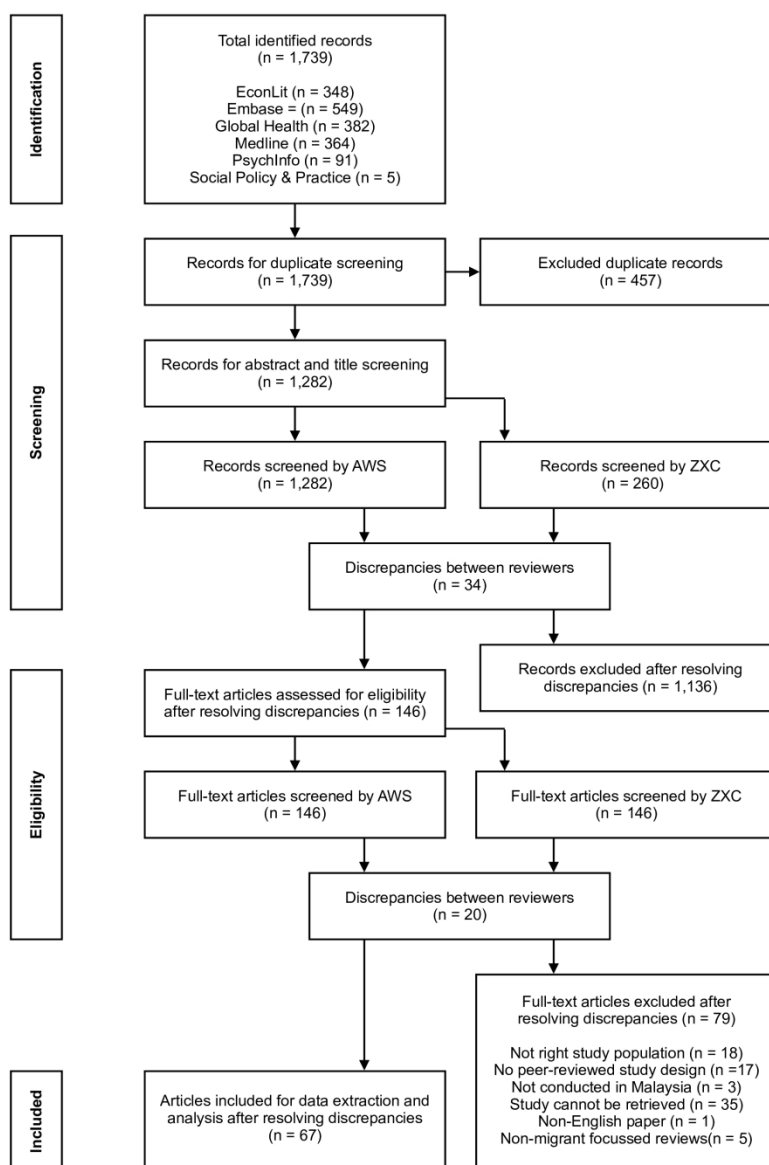

Figure 3. Flowchart of the data selection process.

697x1030mm (72 x 72 DPI)



Figure 4. Number of studies disaggregated by health dimension.

1  
2  
3  
4  
5  
6  
7  
8  
9  
10  
11  
12  
13  
14  
15  
16  
17  
18  
19  
20  
21  
22  
23  
24  
25  
26  
27  
28  
29  
30  
31  
32  
33  
34  
35  
36  
37  
38  
39  
40  
41  
42  
43  
44  
45  
46  
47  
48  
49  
50  
51  
52  
53  
54  
55  
56  
57  
58  
59  
60



Figure 5. Number of studies disaggregated by type of migrant.

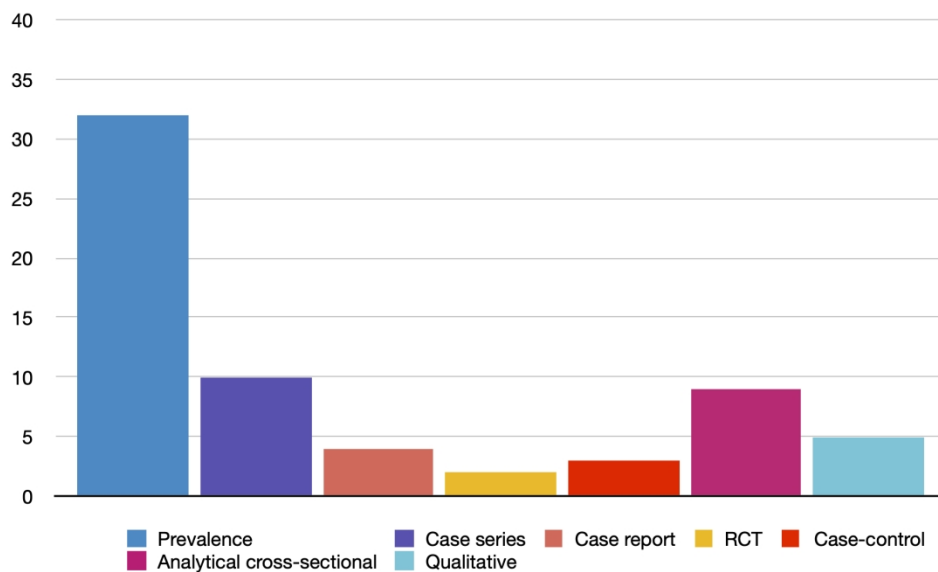

Figure 6. Number of studies disaggregated by research design.

1  
2  
3  
4  
5  
6  
7  
8  
9  
10  
11  
12  
13  
14  
15  
16  
17  
18  
19  
20  
21  
22  
23  
24  
25  
26  
27  
28  
29  
30  
31  
32  
33  
34  
35  
36  
37  
38  
39  
40  
41  
42  
43  
44  
45  
46  
47  
48  
49  
50  
51  
52  
53  
54  
55  
56  
57  
58  
59  
60



Figure 7. Results of the multiple-correspondence analysis (MCA).

317x173mm (72 x 72 DPI)

## Preferred Reporting Items for Systematic reviews and Meta-Analyses extension for Scoping Reviews (PRISMA-ScR) Checklist

| SECTION                                               | ITEM | PRISMA-ScR CHECKLIST ITEM                                                                                                                                                                                                                                                                                  | REPORTED ON PAGE # |
|-------------------------------------------------------|------|------------------------------------------------------------------------------------------------------------------------------------------------------------------------------------------------------------------------------------------------------------------------------------------------------------|--------------------|
| <b>TITLE</b>                                          |      |                                                                                                                                                                                                                                                                                                            |                    |
| Title                                                 | 1    | Identify the report as a scoping review.                                                                                                                                                                                                                                                                   |                    |
| <b>ABSTRACT</b>                                       |      |                                                                                                                                                                                                                                                                                                            |                    |
| Structured summary                                    | 2    | Provide a structured summary that includes (as applicable): background, objectives, eligibility criteria, sources of evidence, charting methods, results, and conclusions that relate to the review questions and objectives.                                                                              |                    |
| <b>INTRODUCTION</b>                                   |      |                                                                                                                                                                                                                                                                                                            |                    |
| Rationale                                             | 3    | Describe the rationale for the review in the context of what is already known. Explain why the review questions/objectives lend themselves to a scoping review approach.                                                                                                                                   |                    |
| Objectives                                            | 4    | Provide an explicit statement of the questions and objectives being addressed with reference to their key elements (e.g., population or participants, concepts, and context) or other relevant key elements used to conceptualize the review questions and/or objectives.                                  |                    |
| <b>METHODS</b>                                        |      |                                                                                                                                                                                                                                                                                                            |                    |
| Protocol and registration                             | 5    | Indicate whether a review protocol exists; state if and where it can be accessed (e.g., a Web address); and if available, provide registration information, including the registration number.                                                                                                             |                    |
| Eligibility criteria                                  | 6    | Specify characteristics of the sources of evidence used as eligibility criteria (e.g., years considered, language, and publication status), and provide a rationale.                                                                                                                                       |                    |
| Information sources*                                  | 7    | Describe all information sources in the search (e.g., databases with dates of coverage and contact with authors to identify additional sources), as well as the date the most recent search was executed.                                                                                                  |                    |
| Search                                                | 8    | Present the full electronic search strategy for at least 1 database, including any limits used, such that it could be repeated.                                                                                                                                                                            |                    |
| Selection of sources of evidence†                     | 9    | State the process for selecting sources of evidence (i.e., screening and eligibility) included in the scoping review.                                                                                                                                                                                      |                    |
| Data charting process‡                                | 10   | Describe the methods of charting data from the included sources of evidence (e.g., calibrated forms or forms that have been tested by the team before their use, and whether data charting was done independently or in duplicate) and any processes for obtaining and confirming data from investigators. |                    |
| Data items                                            | 11   | List and define all variables for which data were sought and any assumptions and simplifications made.                                                                                                                                                                                                     |                    |
| Critical appraisal of individual sources of evidence§ | 12   | If done, provide a rationale for conducting a critical appraisal of included sources of evidence; describe the methods used and how this information was used in any data synthesis (if appropriate).                                                                                                      |                    |
| Synthesis of results                                  | 13   | Describe the methods of handling and summarizing the data that were charted.                                                                                                                                                                                                                               |                    |



| SECTION                                       | ITEM | PRISMA-ScR CHECKLIST ITEM                                                                                                                                                                       | REPORTED ON PAGE # |
|-----------------------------------------------|------|-------------------------------------------------------------------------------------------------------------------------------------------------------------------------------------------------|--------------------|
| <b>RESULTS</b>                                |      |                                                                                                                                                                                                 |                    |
| Selection of sources of evidence              | 14   | Give numbers of sources of evidence screened, assessed for eligibility, and included in the review, with reasons for exclusions at each stage, ideally using a flow diagram.                    |                    |
| Characteristics of sources of evidence        | 15   | For each source of evidence, present characteristics for which data were charted and provide the citations.                                                                                     |                    |
| Critical appraisal within sources of evidence | 16   | If done, present data on critical appraisal of included sources of evidence (see item 12).                                                                                                      |                    |
| Results of individual sources of evidence     | 17   | For each included source of evidence, present the relevant data that were charted that relate to the review questions and objectives.                                                           |                    |
| Synthesis of results                          | 18   | Summarize and/or present the charting results as they relate to the review questions and objectives.                                                                                            |                    |
| <b>DISCUSSION</b>                             |      |                                                                                                                                                                                                 |                    |
| Summary of evidence                           | 19   | Summarize the main results (including an overview of concepts, themes, and types of evidence available), link to the review questions and objectives, and consider the relevance to key groups. |                    |
| Limitations                                   | 20   | Discuss the limitations of the scoping review process.                                                                                                                                          |                    |
| Conclusions                                   | 21   | Provide a general interpretation of the results with respect to the review questions and objectives, as well as potential implications and/or next steps.                                       |                    |
| <b>FUNDING</b>                                |      |                                                                                                                                                                                                 |                    |
| Funding                                       | 22   | Describe sources of funding for the included sources of evidence, as well as sources of funding for the scoping review. Describe the role of the funders of the scoping review.                 |                    |

JBI = Joanna Briggs Institute; PRISMA-ScR = Preferred Reporting Items for Systematic reviews and Meta-Analyses extension for Scoping Reviews.

\* Where *sources of evidence* (see second footnote) are compiled from, such as bibliographic databases, social media platforms, and Web sites.

† A more inclusive/heterogeneous term used to account for the different types of evidence or data sources (e.g., quantitative and/or qualitative research, expert opinion, and policy documents) that may be eligible in a scoping review as opposed to only studies. This is not to be confused with *information sources* (see first footnote).

‡ The frameworks by Arksey and O'Malley (6) and Levac and colleagues (7) and the JBI guidance (4, 5) refer to the process of data extraction in a scoping review as data charting.

§ The process of systematically examining research evidence to assess its validity, results, and relevance before using it to inform a decision. This term is used for items 12 and 19 instead of "risk of bias" (which is more applicable to systematic reviews of interventions) to include and acknowledge the various sources of evidence that may be used in a scoping review (e.g., quantitative and/or qualitative research, expert opinion, and policy document).

From: Tricco AC, Lillie E, Zarin W, O'Brien KK, Colquhoun H, Levac D, et al. PRISMA Extension for Scoping Reviews (PRISMA-ScR): Checklist and Explanation. *Ann Intern Med.* 2018;169:467–473. doi: [10.7326/M18-0850](https://doi.org/10.7326/M18-0850).



St. Michael's

Inspired Care.  
Inspiring Science.

For peer review only - <http://bmjopen.bmj.com/site/about/guidelines.xhtml>

## Supplementary file 2. Detailed search strategy

### I.1. EconLit

|                            |                            |
|----------------------------|----------------------------|
| Database name              | EconLit                    |
| Database search engine     | OvidSP                     |
| Dates of database coverage | 1886 to September 12, 2019 |
| Date search conducted      | 17 September 2019          |
| Total number of hits       | 348                        |

| # | Searches                                                                                                                                                                                                                                                                                                                                                                                                                                                                                                                                                                                                                                                                                                                                                                                                                                                                                                                                                                                                                                                                                                                                                                                                                                                                                                                                                                                                                                                                                                  | Results |
|---|-----------------------------------------------------------------------------------------------------------------------------------------------------------------------------------------------------------------------------------------------------------------------------------------------------------------------------------------------------------------------------------------------------------------------------------------------------------------------------------------------------------------------------------------------------------------------------------------------------------------------------------------------------------------------------------------------------------------------------------------------------------------------------------------------------------------------------------------------------------------------------------------------------------------------------------------------------------------------------------------------------------------------------------------------------------------------------------------------------------------------------------------------------------------------------------------------------------------------------------------------------------------------------------------------------------------------------------------------------------------------------------------------------------------------------------------------------------------------------------------------------------|---------|
| 1 | asylum* OR displaced OR emigra* OR emigre* OR foreign born OR foreign labor OR foreign labour OR foreign work* OR foreign-born OR foreign-work* OR foreigner* OR immigra* OR migra* OR people of concern OR person of concern OR persons of concern OR refugee* OR smuggl* OR traffick* OR transient* OR transmigrant*                                                                                                                                                                                                                                                                                                                                                                                                                                                                                                                                                                                                                                                                                                                                                                                                                                                                                                                                                                                                                                                                                                                                                                                    | 120,090 |
| 2 | abnormalit* OR abortion* OR abscess* OR accident* OR ache* OR aids OR ailment* OR alcohol* OR allerg* OR anorexia OR AMR OR antibiotic resistan* OR antimicrobial resistan* OR anxiet* OR allerg* OR apnoea OR arthritis OR ascariasis OR assault* OR asthma OR attack* OR bacteri* OR bipolar OR bite* OR blastoma* OR bleed* OR blind OR blood OR burn* OR cancer* OR cardio* OR Chagas OR chlamydia OR cholesterol OR coma OR complication* OR condition* OR condom* OR contraception OR cyst* OR dead OR deaf OR death* OR decay OR deform* OR dehydrat* OR dementia OR dengue OR depress* OR diabetes OR diarrhoea OR disabilit* OR disease* OR disorder* OR dracunculiasis OR drug* OR dysfunction* OR eczema OR enlargement* OR epilep* OR exhaust* OR failure OR fatal* OR fatigue OR fever* OR filariasis OR flu OR gall stone* gallstone* OR gonorrhoea OR headache* OR health OR healthcare OR hearing loss OR helminth* OR hepatitis OR hernia* OR herpe* OR HIV OR hookworm* OR HPV OR hypertension OR illness* OR indigestion* OR infect* OR inflame* OR injur* OR leishmaniasis OR leprosy OR leukaemia OR leukemia OR lice OR life expectancy OR malaria OR malformat* OR malnutrition OR measles OR medical OR melanoma* OR mental* OR migraine OR miscarriage* OR morbidit* OR mortalit* OR muscl* OR myeloma OR nausea OR neuro* OR nutrition* OR onchocerciasis OR osteoarthritis OR osteoporosis OR pain* OR parasite* OR patient care OR physical activ* OR pneumonia OR poison* OR | 373,019 |



|    |                                                                                                                                                                                                                                                                                                                                                                                                                                                                                                                                                                                                        |         |
|----|--------------------------------------------------------------------------------------------------------------------------------------------------------------------------------------------------------------------------------------------------------------------------------------------------------------------------------------------------------------------------------------------------------------------------------------------------------------------------------------------------------------------------------------------------------------------------------------------------------|---------|
|    | psoriasis OR psychiatric OR psychos* OR rabies OR rape* OR reproductiv* OR rheuma* OR ringworm* OR sarcoma* OR scabies OR schistosomiasis OR schizophren* OR seizure* OR sepsis* OR sexual* OR shock* OR sick* OR smoking OR sore* OR STD* OR stillbirth* OR stress* OR stroke* OR suicid* OR sunburn* OR syndrome* OR syphilis OR TB OR thrombosis OR tobacco OR STI* OR toothache* OR trachoma OR trauma* OR trichuriasis OR trichomoniasis OR trypanosomiasis OR tuberculosis OR tumor* OR tumour* OR ulcer* OR violence OR virus* OR vomit* OR wart* OR well-being OR wellbeing OR worm* OR wound* |         |
|    |                                                                                                                                                                                                                                                                                                                                                                                                                                                                                                                                                                                                        |         |
| 3  | Malaysia OR Johor OR Kedah OR Kelantan OR Kuala Lumpur OR Labuan OR Malacca OR Melaka OR Malaya OR Negeri Sembilan OR Pahang OR Penang OR Perak OR Perlis OR Putrajaya OR Sabah OR Sarawak OR Selangor OR Terengganu                                                                                                                                                                                                                                                                                                                                                                                   | 6,883   |
| 4  | Malaysian                                                                                                                                                                                                                                                                                                                                                                                                                                                                                                                                                                                              | 1,654   |
| 5  | area* OR Borneo OR city OR cities OR district* OR island* OR isle* OR province* OR region* OR state* OR territor* OR village*                                                                                                                                                                                                                                                                                                                                                                                                                                                                          | 367,269 |
| 6  | 4 AND 5                                                                                                                                                                                                                                                                                                                                                                                                                                                                                                                                                                                                | 361     |
| 7  | 3 OR 6                                                                                                                                                                                                                                                                                                                                                                                                                                                                                                                                                                                                 | 6,925   |
|    |                                                                                                                                                                                                                                                                                                                                                                                                                                                                                                                                                                                                        |         |
| 8  | 1 AND 2 AND 7                                                                                                                                                                                                                                                                                                                                                                                                                                                                                                                                                                                          | 348     |
|    |                                                                                                                                                                                                                                                                                                                                                                                                                                                                                                                                                                                                        |         |
| 9  | Animal migration OR bird migration OR cell* OR membrane* OR molecu*                                                                                                                                                                                                                                                                                                                                                                                                                                                                                                                                    | 2,622   |
| 10 | 8 NOT 9                                                                                                                                                                                                                                                                                                                                                                                                                                                                                                                                                                                                | 348     |

## I.2. Embase

|                            |                           |
|----------------------------|---------------------------|
| Database name              | Embase                    |
| Database search engine     | OvidSP                    |
| Dates of database coverage | 1947 to 2019 September 13 |
| Date search conducted      | 17 September 2019         |
| Total number of hits       | 549                       |

| #  | Searches                                                                                                                                                                                                                                                                                                               | Results    |
|----|------------------------------------------------------------------------------------------------------------------------------------------------------------------------------------------------------------------------------------------------------------------------------------------------------------------------|------------|
| 1  | asylum* OR displaced OR emigra* OR emigre* OR foreign born OR foreign labor OR foreign labour OR foreign work* OR foreign-born OR foreign-work* OR foreigner* OR immigra* OR migra* OR people of concern OR person of concern OR persons of concern OR refugee* OR smuggl* OR traffick* OR transient* OR transmigrant* | 1,124,805  |
| 2  | asylum seeker [MeSH]                                                                                                                                                                                                                                                                                                   | 793        |
| 3  | emigrant [MeSH]                                                                                                                                                                                                                                                                                                        | 293        |
| 4  | foreign worker [MeSH]                                                                                                                                                                                                                                                                                                  | 5,306      |
| 5  | human trafficking [MeSH]                                                                                                                                                                                                                                                                                               | 697        |
| 6  | migrant worker [MeSH]                                                                                                                                                                                                                                                                                                  | 1,548      |
| 7  | migrant [MeSH]                                                                                                                                                                                                                                                                                                         | 35,567     |
| 8  | migration [MeSH]                                                                                                                                                                                                                                                                                                       | 45,436     |
| 9  | immigrant [MeSH]                                                                                                                                                                                                                                                                                                       | 16,376     |
| 10 | refugee [MeSH]                                                                                                                                                                                                                                                                                                         | 12,425     |
| 11 | refugee camp [MeSH]                                                                                                                                                                                                                                                                                                    | 553        |
| 12 | undocumented immigrant [MeSH]                                                                                                                                                                                                                                                                                          | 350        |
| 13 | 1 OR 2 OR 3 OR 4 OR 5 OR 6 OR 7 OR 8 OR 9 OR 10 OR 11 OR 12                                                                                                                                                                                                                                                            | 1,125,119  |
| 14 | abnormalit* OR abortion* OR abscess* OR accident* OR ache* OR aids OR ailment* OR alcohol* OR allerg* OR anorexia OR AMR OR antibiotic resistan* OR antimicrobial resistan* OR anxiet* OR allerg* OR apnoea OR arthritis OR ascariasis OR assault* OR asthma OR attack* OR bacteri* OR bipolar OR bite* OR blastoma*   | 31,271,711 |

|    |                                                                                                                                                                                                                                                                                                                                                                                                                                                                                                                                                                                                                                                                                                                                                                                                                                                                                                                                                                                                                                                                                                                                                                                                                                                                                                                                                                                                                                                                                                                                                                                                                                                                                                                                                                                          |            |
|----|------------------------------------------------------------------------------------------------------------------------------------------------------------------------------------------------------------------------------------------------------------------------------------------------------------------------------------------------------------------------------------------------------------------------------------------------------------------------------------------------------------------------------------------------------------------------------------------------------------------------------------------------------------------------------------------------------------------------------------------------------------------------------------------------------------------------------------------------------------------------------------------------------------------------------------------------------------------------------------------------------------------------------------------------------------------------------------------------------------------------------------------------------------------------------------------------------------------------------------------------------------------------------------------------------------------------------------------------------------------------------------------------------------------------------------------------------------------------------------------------------------------------------------------------------------------------------------------------------------------------------------------------------------------------------------------------------------------------------------------------------------------------------------------|------------|
|    | OR bleed* OR blind OR blood OR burn* OR cancer* OR cardio* OR Chagas OR chlamydia OR cholesterol OR coma OR complication* OR condition* OR condom* OR contraception OR cyst* OR dead OR deaf OR death* OR decay OR deform* OR dehydrat* OR dementia OR dengue OR depress* OR diabetes OR diarrhoea OR disabilit* OR disease* OR disorder* OR dracunculiasis OR drug* OR dysfunction* OR eczema OR enlargement* OR epilep* OR exhaust* OR failure OR fatal* OR fatigue OR fever* OR filariasis OR flu OR gall stone* gallstone* OR gonorrhoea OR headache* OR health OR healthcare OR hearing loss OR helminth* OR hepatitis OR hernia* OR herpe* OR HIV OR hookworm* OR HPV OR hypertension OR illness* OR indigestion* OR infect* OR inflame* OR injur* OR leishmaniasis OR leprosy OR leukaemia OR leukemia OR lice OR life expectancy OR malaria OR malformat* malnutrition OR measles OR medical OR melanoma* OR mental* OR migraine OR miscarriage* OR morbidit* OR mortalit* OR muscl* OR myeloma OR nausea OR neuro* OR nutrition* OR onchocerciasis OR osteoarthritis OR osteoporosis OR pain* OR parasite* OR patient care OR physical activ* OR pneumonia OR poison* OR psoriasis OR psychiatric OR psychos* OR rabies OR rape* OR reproductiv* OR rheuma* OR ringworm* OR sarcoma* OR scabies OR schistosomiasis OR schizophren* OR seizure* OR sepsis* OR sexual* OR shock* OR sick* OR smoking OR sore* OR STD* OR stillbirth* OR stress* OR stroke* OR suicid* OR sunburn* OR syndrome* OR syphilis OR TB OR thrombosis OR tobacco OR STI* OR toothache* OR trachoma OR trauma* OR trichuriasis OR trichomoniasis OR trypanosomiasis OR tuberculosis OR tumor* OR tumour* OR ulcer* OR violence OR virus* OR vomit* OR wart* OR well-being OR wellbeing OR worm* OR wound* |            |
| 15 | accident [MeSH]                                                                                                                                                                                                                                                                                                                                                                                                                                                                                                                                                                                                                                                                                                                                                                                                                                                                                                                                                                                                                                                                                                                                                                                                                                                                                                                                                                                                                                                                                                                                                                                                                                                                                                                                                                          | 209,815    |
| 16 | diseases [MeSH]                                                                                                                                                                                                                                                                                                                                                                                                                                                                                                                                                                                                                                                                                                                                                                                                                                                                                                                                                                                                                                                                                                                                                                                                                                                                                                                                                                                                                                                                                                                                                                                                                                                                                                                                                                          | 23,553,673 |
| 17 | health [MeSH]                                                                                                                                                                                                                                                                                                                                                                                                                                                                                                                                                                                                                                                                                                                                                                                                                                                                                                                                                                                                                                                                                                                                                                                                                                                                                                                                                                                                                                                                                                                                                                                                                                                                                                                                                                            | 688,819    |
| 18 | health behavior [MeSH]                                                                                                                                                                                                                                                                                                                                                                                                                                                                                                                                                                                                                                                                                                                                                                                                                                                                                                                                                                                                                                                                                                                                                                                                                                                                                                                                                                                                                                                                                                                                                                                                                                                                                                                                                                   | 396,908    |
| 19 | health care [MeSH]                                                                                                                                                                                                                                                                                                                                                                                                                                                                                                                                                                                                                                                                                                                                                                                                                                                                                                                                                                                                                                                                                                                                                                                                                                                                                                                                                                                                                                                                                                                                                                                                                                                                                                                                                                       | 5,107,719  |
| 20 | health care facility [MeSH]                                                                                                                                                                                                                                                                                                                                                                                                                                                                                                                                                                                                                                                                                                                                                                                                                                                                                                                                                                                                                                                                                                                                                                                                                                                                                                                                                                                                                                                                                                                                                                                                                                                                                                                                                              | 1,641,961  |
| 21 | health care policy [MeSH]                                                                                                                                                                                                                                                                                                                                                                                                                                                                                                                                                                                                                                                                                                                                                                                                                                                                                                                                                                                                                                                                                                                                                                                                                                                                                                                                                                                                                                                                                                                                                                                                                                                                                                                                                                | 188,812    |
| 22 | health service [MeSH]                                                                                                                                                                                                                                                                                                                                                                                                                                                                                                                                                                                                                                                                                                                                                                                                                                                                                                                                                                                                                                                                                                                                                                                                                                                                                                                                                                                                                                                                                                                                                                                                                                                                                                                                                                    | 5,405,209  |
| 23 | infection [MeSH]                                                                                                                                                                                                                                                                                                                                                                                                                                                                                                                                                                                                                                                                                                                                                                                                                                                                                                                                                                                                                                                                                                                                                                                                                                                                                                                                                                                                                                                                                                                                                                                                                                                                                                                                                                         | 3,626,633  |
| 24 | injury [MeSH]                                                                                                                                                                                                                                                                                                                                                                                                                                                                                                                                                                                                                                                                                                                                                                                                                                                                                                                                                                                                                                                                                                                                                                                                                                                                                                                                                                                                                                                                                                                                                                                                                                                                                                                                                                            | 2,303,491  |
| 25 | malnutrition [MeSH]                                                                                                                                                                                                                                                                                                                                                                                                                                                                                                                                                                                                                                                                                                                                                                                                                                                                                                                                                                                                                                                                                                                                                                                                                                                                                                                                                                                                                                                                                                                                                                                                                                                                                                                                                                      | 178,039    |

|    |                                                                                                                                                                                                                      |            |
|----|----------------------------------------------------------------------------------------------------------------------------------------------------------------------------------------------------------------------|------------|
| 26 | morbidity [MeSH]                                                                                                                                                                                                     | 361,003    |
| 27 | mortality [MeSH]                                                                                                                                                                                                     | 1,081,969  |
| 28 | neoplasm [MeSH]                                                                                                                                                                                                      | 4,683,051  |
| 29 | parasite [MeSH]                                                                                                                                                                                                      | 36,154     |
| 30 | virus [MeSH]                                                                                                                                                                                                         | 907,130    |
| 31 | 14 OR 15 OR 16 OR 17 OR 18 OR 19 OR 20 OR 21 OR 21 OR 22 OR 23 OR 24 OR 25 OR 26 OR 27 OR 28 OR 29 OR 30                                                                                                             | 32,849,152 |
| 32 | Malaysia OR Johor OR Kedah OR Kelantan OR Kuala Lumpur OR Labuan OR Malacca OR Melaka OR Malaya OR Negeri Sembilan OR Pahang OR Penang OR Perak OR Perlis OR Putrajaya OR Sabah OR Sarawak OR Selangor OR Terengganu | 28,901     |
| 33 | Malaysian                                                                                                                                                                                                            | 1,611      |
| 34 | area* OR Borneo OR city OR cities OR district* OR island* OR isle* OR province* OR region* OR state* OR territor* OR village*                                                                                        | 7,357,992  |
| 35 | 33 AND 34                                                                                                                                                                                                            | 395        |
| 36 | 32 OR 35                                                                                                                                                                                                             | 29,057     |
| 37 | 13 AND 31 AND 36                                                                                                                                                                                                     | 651        |
| 38 | Animal migration OR bird migration OR cell* OR membrane* OR molecu*                                                                                                                                                  | 10,280,170 |
| 39 | 37 NOT 38                                                                                                                                                                                                            | 549        |

### I.3. Global Health

|                            |                      |
|----------------------------|----------------------|
| Database name              | Global Health        |
| Database search engine     | OvidSP               |
| Dates of database coverage | 1910 to 2019 Week 36 |
| Date search conducted      | 17 September 2019    |
| Total number of hits       | 382                  |

| # | Searches                                                                                                                                                                                                                                                                                                                                                                                                                                                                                                                                                                                                                                                                                                                                                                                                                                                                                                                                                                                                                        | Results   |
|---|---------------------------------------------------------------------------------------------------------------------------------------------------------------------------------------------------------------------------------------------------------------------------------------------------------------------------------------------------------------------------------------------------------------------------------------------------------------------------------------------------------------------------------------------------------------------------------------------------------------------------------------------------------------------------------------------------------------------------------------------------------------------------------------------------------------------------------------------------------------------------------------------------------------------------------------------------------------------------------------------------------------------------------|-----------|
| 1 | asylum* OR displaced OR emigra* OR emigre* OR foreign born OR foreign labor OR foreign labour OR foreign work* OR foreign-born OR foreign-work* OR foreigner* OR immigra* OR migra* OR people of concern OR person of concern OR persons of concern OR refugee* OR smuggl* OR traffick* OR transient* OR transmigrant*                                                                                                                                                                                                                                                                                                                                                                                                                                                                                                                                                                                                                                                                                                          | 89,712    |
| 2 | immigrants [MeSH]                                                                                                                                                                                                                                                                                                                                                                                                                                                                                                                                                                                                                                                                                                                                                                                                                                                                                                                                                                                                               | 7,830     |
| 3 | migrant labour [MeSH]                                                                                                                                                                                                                                                                                                                                                                                                                                                                                                                                                                                                                                                                                                                                                                                                                                                                                                                                                                                                           | 1,006     |
| 4 | migrants [MeSH]                                                                                                                                                                                                                                                                                                                                                                                                                                                                                                                                                                                                                                                                                                                                                                                                                                                                                                                                                                                                                 | 3,576     |
| 5 | migration [MeSH]                                                                                                                                                                                                                                                                                                                                                                                                                                                                                                                                                                                                                                                                                                                                                                                                                                                                                                                                                                                                                | 3,819     |
| 6 | refugees [MeSH]                                                                                                                                                                                                                                                                                                                                                                                                                                                                                                                                                                                                                                                                                                                                                                                                                                                                                                                                                                                                                 | 3,687     |
| 7 | 1 OR 2 OR 3 OR 4 OR 5 OR 6                                                                                                                                                                                                                                                                                                                                                                                                                                                                                                                                                                                                                                                                                                                                                                                                                                                                                                                                                                                                      | 89,712    |
| 8 | abnormalit* OR abortion* OR abscess* OR accident* OR ache* OR aids OR ailment* OR alcohol* OR allerg* OR anorexia OR AMR OR antibiotic resistan* OR antimicrobial resistan* OR anxiet* OR allerg* OR apnoea OR arthritis OR ascariasis OR assault* OR asthma OR attack* OR bacteri* OR bipolar OR bite* OR blastoma* OR bleed* OR blind OR blood OR burn* OR cancer* OR cardio* OR Chagas OR chlamydia OR cholesterol OR coma OR complication* OR condition* OR condom* OR contraception OR cyst* OR dead OR deaf OR death* OR decay OR deform* OR dehydrat* OR dementia OR dengue OR depress* OR diabetes OR diarrhoea OR disabilit* OR disease* OR disorder* OR dracunculiasis OR drug* OR dysfunction* OR eczema OR enlargement* OR epilep* OR exhaust* OR failure OR fatal* OR fatigue OR fever* OR filariasis OR flu OR gall stone* gallstone* OR gonorrhoea OR headache* OR health OR healthcare OR hearing loss OR helminth* OR hepatitis OR hernia* OR herpe* OR HIV OR hookworm* OR HPV OR hypertension OR illness* OR | 3,675,317 |

|    |                                                                                                                                                                                                                                                                                                                                                                                                                                                                                                                                                                                                                                                                                                                                                                                                                                                                                                                                                                                                                                                                                  |           |
|----|----------------------------------------------------------------------------------------------------------------------------------------------------------------------------------------------------------------------------------------------------------------------------------------------------------------------------------------------------------------------------------------------------------------------------------------------------------------------------------------------------------------------------------------------------------------------------------------------------------------------------------------------------------------------------------------------------------------------------------------------------------------------------------------------------------------------------------------------------------------------------------------------------------------------------------------------------------------------------------------------------------------------------------------------------------------------------------|-----------|
|    | indigestion* OR infect* OR inflame* OR injur* OR leishmaniasis OR leprosy OR leukaemia OR leukemia OR lice OR life expectancy OR malaria OR malformat* OR malnutrition OR measles OR medical OR melanoma* OR mental* OR migraine OR miscarriage* OR morbidit* OR mortalit* OR muscl* OR myeloma OR nausea OR neuro* OR nutrition* OR onchocerciasis OR osteoarthritis OR osteoporosis OR pain* OR parasite* OR patient care OR physical activ* OR pneumonia OR poison* OR psoriasis OR psychiatric OR psychos* OR rabies OR rape* OR reproductiv* OR rheuma* OR ringworm* OR sarcoma* OR scabies OR schistosomiasis OR schizophren* OR seizure* OR sepsis* OR sexual* OR shock* OR sick* OR smoking OR sore* OR STD* OR stillbirth* OR stress* OR stroke* OR suicid* OR sunburn* OR syndrome* OR syphilis OR TB OR thrombosis OR tobacco OR STI* OR toothache* OR trachoma OR trauma* OR trichuriasis OR trichomoniasis OR trypanosomiasis OR tuberculosis OR tumor* OR tumour* OR ulcer* OR violence OR virus* OR vomit* OR wart* OR well-being OR wellbeing OR worm* OR wound* |           |
| 9  | accidents [MeSH]                                                                                                                                                                                                                                                                                                                                                                                                                                                                                                                                                                                                                                                                                                                                                                                                                                                                                                                                                                                                                                                                 | 14,359    |
| 10 | diseases [MeSH]                                                                                                                                                                                                                                                                                                                                                                                                                                                                                                                                                                                                                                                                                                                                                                                                                                                                                                                                                                                                                                                                  | 2,302,791 |
| 11 | health [MeSH]                                                                                                                                                                                                                                                                                                                                                                                                                                                                                                                                                                                                                                                                                                                                                                                                                                                                                                                                                                                                                                                                    | 283,009   |
| 12 | health behaviour [MeSH]                                                                                                                                                                                                                                                                                                                                                                                                                                                                                                                                                                                                                                                                                                                                                                                                                                                                                                                                                                                                                                                          | 11,560    |
| 13 | health care [MeSH]                                                                                                                                                                                                                                                                                                                                                                                                                                                                                                                                                                                                                                                                                                                                                                                                                                                                                                                                                                                                                                                               | 91,876    |
| 14 | health policy [MeSH]                                                                                                                                                                                                                                                                                                                                                                                                                                                                                                                                                                                                                                                                                                                                                                                                                                                                                                                                                                                                                                                             | 20,150    |
| 15 | health services [MeSH]                                                                                                                                                                                                                                                                                                                                                                                                                                                                                                                                                                                                                                                                                                                                                                                                                                                                                                                                                                                                                                                           | 88,605    |
| 16 | infection [MeSH]                                                                                                                                                                                                                                                                                                                                                                                                                                                                                                                                                                                                                                                                                                                                                                                                                                                                                                                                                                                                                                                                 | 100,189   |
| 17 | injuries [MeSH]                                                                                                                                                                                                                                                                                                                                                                                                                                                                                                                                                                                                                                                                                                                                                                                                                                                                                                                                                                                                                                                                  | 3,171     |
| 18 | malnutrition [MeSH]                                                                                                                                                                                                                                                                                                                                                                                                                                                                                                                                                                                                                                                                                                                                                                                                                                                                                                                                                                                                                                                              | 28,215    |
| 19 | morbidity [MeSH]                                                                                                                                                                                                                                                                                                                                                                                                                                                                                                                                                                                                                                                                                                                                                                                                                                                                                                                                                                                                                                                                 | 28,845    |
| 20 | mortality [MeSH]                                                                                                                                                                                                                                                                                                                                                                                                                                                                                                                                                                                                                                                                                                                                                                                                                                                                                                                                                                                                                                                                 | 135,836   |
| 21 | neoplasm [MeSH]                                                                                                                                                                                                                                                                                                                                                                                                                                                                                                                                                                                                                                                                                                                                                                                                                                                                                                                                                                                                                                                                  | 225,495   |
| 22 | parasites [MeSH]                                                                                                                                                                                                                                                                                                                                                                                                                                                                                                                                                                                                                                                                                                                                                                                                                                                                                                                                                                                                                                                                 | 488,622   |
| 23 | viruses [MeSH]                                                                                                                                                                                                                                                                                                                                                                                                                                                                                                                                                                                                                                                                                                                                                                                                                                                                                                                                                                                                                                                                   | 496,168   |
| 24 | 8 OR 9 OR 10 OR 11 OR 12 OR 13 OR 14 OR 15 OR 16 OR 17 OR 18 OR 19 OR 20 OR 21 OR 22 OR 23                                                                                                                                                                                                                                                                                                                                                                                                                                                                                                                                                                                                                                                                                                                                                                                                                                                                                                                                                                                       | 3,688,190 |

|    |                                                                                                                                                                                                                      |           |
|----|----------------------------------------------------------------------------------------------------------------------------------------------------------------------------------------------------------------------|-----------|
|    |                                                                                                                                                                                                                      |           |
| 25 | Malaysia OR Johor OR Kedah OR Kelantan OR Kuala Lumpur OR Labuan OR Malacca OR Melaka OR Malaya OR Negeri Sembilan OR Pahang OR Penang OR Perak OR Perlis OR Putrajaya OR Sabah OR Sarawak OR Selangor OR Terengganu | 17,417    |
| 26 | Malaysian                                                                                                                                                                                                            | 3,366     |
| 27 | area* OR Borneo OR city OR cities OR district* OR island* OR isle* OR province* OR region* OR state* OR territor* OR village*                                                                                        | 1,392,874 |
| 28 | 26 AND 27                                                                                                                                                                                                            | 1,138     |
| 29 | 25 OR 28                                                                                                                                                                                                             | 17,513    |
|    |                                                                                                                                                                                                                      |           |
| 30 | 7 AND 24 AND 29                                                                                                                                                                                                      | 429       |
|    |                                                                                                                                                                                                                      |           |
| 31 | Animal migration OR bird migration OR cell* OR membrane* OR molercul*                                                                                                                                                | 833,650   |
| 32 | 30 NOT 31                                                                                                                                                                                                            | 382       |

#### I.4. Medline

|                            |                               |
|----------------------------|-------------------------------|
| Database name              | Medline                       |
| Database search engine     | OvidSP                        |
| Dates of database coverage | 1946 to September Week 1 2019 |
| Date search conducted      | 17 September 2019             |
| Total number of hits       | 364                           |

| # | Searches                                                                                                                                                                                                                                                                                                                                                                                                                                                                                                                                                                                                                                                                                                                                                                                                                                                                                                                                                                                                                        | Results    |
|---|---------------------------------------------------------------------------------------------------------------------------------------------------------------------------------------------------------------------------------------------------------------------------------------------------------------------------------------------------------------------------------------------------------------------------------------------------------------------------------------------------------------------------------------------------------------------------------------------------------------------------------------------------------------------------------------------------------------------------------------------------------------------------------------------------------------------------------------------------------------------------------------------------------------------------------------------------------------------------------------------------------------------------------|------------|
| 1 | asylum* OR displaced OR emigra* OR emigre* OR foreign born OR foreign labor OR foreign labour OR foreign work* OR foreign-born OR foreign-work* OR foreigner* OR immigra* OR migra* OR people of concern OR person of concern OR persons of concern OR refugee* OR smuggl* OR traffick* OR transient* OR transmigrant*                                                                                                                                                                                                                                                                                                                                                                                                                                                                                                                                                                                                                                                                                                          | 720,051    |
| 2 | “Emigrants and Immigrants” [MeSH]                                                                                                                                                                                                                                                                                                                                                                                                                                                                                                                                                                                                                                                                                                                                                                                                                                                                                                                                                                                               | 11,337     |
| 3 | “Emigration and Immigration” [MeSH]                                                                                                                                                                                                                                                                                                                                                                                                                                                                                                                                                                                                                                                                                                                                                                                                                                                                                                                                                                                             | 24,805     |
| 4 | Human Trafficking [MeSH]                                                                                                                                                                                                                                                                                                                                                                                                                                                                                                                                                                                                                                                                                                                                                                                                                                                                                                                                                                                                        | 347        |
| 5 | Refugees [MeSH]                                                                                                                                                                                                                                                                                                                                                                                                                                                                                                                                                                                                                                                                                                                                                                                                                                                                                                                                                                                                                 | 9,508      |
| 6 | “Transients and Migrants”                                                                                                                                                                                                                                                                                                                                                                                                                                                                                                                                                                                                                                                                                                                                                                                                                                                                                                                                                                                                       | 10,955     |
| 7 | 1 OR 2 OR 3 OR 4 OR 5 OR 6                                                                                                                                                                                                                                                                                                                                                                                                                                                                                                                                                                                                                                                                                                                                                                                                                                                                                                                                                                                                      | 720,051    |
| 8 | abnormalit* OR abortion* OR abscess* OR accident* OR ache* OR aids OR ailment* OR alcohol* OR allerg* OR anorexia OR AMR OR antibiotic resistan* OR antimicrobial resistan* OR anxiet* OR allerg* OR apnoea OR arthritis OR ascariasis OR assault* OR asthma OR attack* OR bacteri* OR bipolar OR bite* OR blastoma* OR bleed* OR blind OR blood OR burn* OR cancer* OR cardio* OR Chagas OR chlamydia OR cholesterol OR coma OR complication* OR condition* OR condom* OR contraception OR cyst* OR dead OR deaf OR death* OR decay OR deform* OR dehydrat* OR dementia OR dengue OR depress* OR diabetes OR diarrhoea OR disabilit* OR disease* OR disorder* OR dracunculiasis OR drug* OR dysfunction* OR eczema OR enlargement* OR epilep* OR exhaust* OR failure OR fatal* OR fatigue OR fever* OR filariasis OR flu OR gall stone* gallstone* OR gonorrhoea OR headache* OR health OR healthcare OR hearing loss OR helminth* OR hepatitis OR hernia* OR herpe* OR HIV OR hookworm* OR HPV OR hypertension OR illness* OR | 21,089,958 |



|    |                                                                                                                                                                                                                                                                                                                                                                                                                                                                                                                                                                                                                                                                                                                                                                                                                                                                                                                                                                                                                                                                                  |           |
|----|----------------------------------------------------------------------------------------------------------------------------------------------------------------------------------------------------------------------------------------------------------------------------------------------------------------------------------------------------------------------------------------------------------------------------------------------------------------------------------------------------------------------------------------------------------------------------------------------------------------------------------------------------------------------------------------------------------------------------------------------------------------------------------------------------------------------------------------------------------------------------------------------------------------------------------------------------------------------------------------------------------------------------------------------------------------------------------|-----------|
|    | indigestion* OR infect* OR inflame* OR injur* OR leishmaniasis OR leprosy OR leukaemia OR leukemia OR lice OR life expectancy OR malaria OR malformat* OR malnutrition OR measles OR medical OR melanoma* OR mental* OR migraine OR miscarriage* OR morbidit* OR mortalit* OR muscl* OR myeloma OR nausea OR neuro* OR nutrition* OR onchocerciasis OR osteoarthritis OR osteoporosis OR pain* OR parasite* OR patient care OR physical activ* OR pneumonia OR poison* OR psoriasis OR psychiatric OR psychos* OR rabies OR rape* OR reproductiv* OR rheuma* OR ringworm* OR sarcoma* OR scabies OR schistosomiasis OR schizophren* OR seizure* OR sepsis* OR sexual* OR shock* OR sick* OR smoking OR sore* OR STD* OR stillbirth* OR stress* OR stroke* OR suicid* OR sunburn* OR syndrome* OR syphilis OR TB OR thrombosis OR tobacco OR STI* OR toothache* OR trachoma OR trauma* OR trichuriasis OR trichomoniasis OR trypanosomiasis OR tuberculosis OR tumor* OR tumour* OR ulcer* OR violence OR virus* OR vomit* OR wart* OR well-being OR wellbeing OR worm* OR wound* |           |
| 9  | Accidents [MeSH]                                                                                                                                                                                                                                                                                                                                                                                                                                                                                                                                                                                                                                                                                                                                                                                                                                                                                                                                                                                                                                                                 | 182,330   |
| 10 | “Delivery of Health Care” [MeSH]                                                                                                                                                                                                                                                                                                                                                                                                                                                                                                                                                                                                                                                                                                                                                                                                                                                                                                                                                                                                                                                 | 1,028,923 |
| 11 | Disease [MeSH]                                                                                                                                                                                                                                                                                                                                                                                                                                                                                                                                                                                                                                                                                                                                                                                                                                                                                                                                                                                                                                                                   | 181,324   |
| 12 | Health [MeSH]                                                                                                                                                                                                                                                                                                                                                                                                                                                                                                                                                                                                                                                                                                                                                                                                                                                                                                                                                                                                                                                                    | 344,725   |
| 13 | Health Behavior [MeSH]                                                                                                                                                                                                                                                                                                                                                                                                                                                                                                                                                                                                                                                                                                                                                                                                                                                                                                                                                                                                                                                           | 301,243   |
| 14 | Health Facilities [MeSH]                                                                                                                                                                                                                                                                                                                                                                                                                                                                                                                                                                                                                                                                                                                                                                                                                                                                                                                                                                                                                                                         | 756,386   |
| 15 | Health Policy [MeSH]                                                                                                                                                                                                                                                                                                                                                                                                                                                                                                                                                                                                                                                                                                                                                                                                                                                                                                                                                                                                                                                             | 102,614   |
| 16 | Health Services [MeSH]                                                                                                                                                                                                                                                                                                                                                                                                                                                                                                                                                                                                                                                                                                                                                                                                                                                                                                                                                                                                                                                           | 2,044,089 |
| 17 | Infection [MeSH]                                                                                                                                                                                                                                                                                                                                                                                                                                                                                                                                                                                                                                                                                                                                                                                                                                                                                                                                                                                                                                                                 | 765,299   |
| 18 | Malnutrition [MeSH]                                                                                                                                                                                                                                                                                                                                                                                                                                                                                                                                                                                                                                                                                                                                                                                                                                                                                                                                                                                                                                                              | 118,335   |
| 19 | Morbidity [MeSH]                                                                                                                                                                                                                                                                                                                                                                                                                                                                                                                                                                                                                                                                                                                                                                                                                                                                                                                                                                                                                                                                 | 524,764   |
| 20 | Mortality [MeSH]                                                                                                                                                                                                                                                                                                                                                                                                                                                                                                                                                                                                                                                                                                                                                                                                                                                                                                                                                                                                                                                                 | 364,390   |
| 21 | Neoplasms [MeSH]                                                                                                                                                                                                                                                                                                                                                                                                                                                                                                                                                                                                                                                                                                                                                                                                                                                                                                                                                                                                                                                                 | 3,212,183 |
| 22 | Parasites [ MeSH]                                                                                                                                                                                                                                                                                                                                                                                                                                                                                                                                                                                                                                                                                                                                                                                                                                                                                                                                                                                                                                                                | 6,776     |
| 23 | Viruses [MeSH]                                                                                                                                                                                                                                                                                                                                                                                                                                                                                                                                                                                                                                                                                                                                                                                                                                                                                                                                                                                                                                                                   | 754,871   |
| 24 | “Wounds and Injuries” [MeSH]                                                                                                                                                                                                                                                                                                                                                                                                                                                                                                                                                                                                                                                                                                                                                                                                                                                                                                                                                                                                                                                     | 873,897   |

|    |                                                                                                                                                                                                                      |            |
|----|----------------------------------------------------------------------------------------------------------------------------------------------------------------------------------------------------------------------|------------|
| 25 | 8 OR 9 OR 10 OR 11 OR 12 OR 13 OR 14 OR 15 OR 16 OR 17 OR 18 OR 19 OR 20 OR 21 OR 22 OR 23 OR 24                                                                                                                     | 21,770,503 |
|    |                                                                                                                                                                                                                      |            |
| 26 | Malaysia OR Johor OR Kedah OR Kelantan OR Kuala Lumpur OR Labuan OR Malacca OR Melaka OR Malaya OR Negeri Sembilan OR Pahang OR Penang OR Perak OR Perlis OR Putrajaya OR Sabah OR Sarawak OR Selangor OR Terengganu | 17,824     |
| 27 | Malaysian                                                                                                                                                                                                            | 4,673      |
| 28 | area* OR Borneo OR city OR cities OR district* OR island* OR isle* OR province* OR region* OR state* OR territor* OR village*                                                                                        | 4,572,673  |
| 29 | 27 AND 28                                                                                                                                                                                                            | 1,297      |
| 30 | 26 OR 29                                                                                                                                                                                                             | 18,038     |
|    |                                                                                                                                                                                                                      |            |
| 31 | 7 AND 25 AND 30                                                                                                                                                                                                      | 404        |
|    |                                                                                                                                                                                                                      |            |
| 32 | Animal migration OR bird migration OR cell* OR membrane* OR molercul*                                                                                                                                                | 6,952,122  |
| 33 | 31 NOT 32                                                                                                                                                                                                            | 364        |

### I.5. PsychInfo

|                            |                               |
|----------------------------|-------------------------------|
| Database name              | PsychInfo                     |
| Database search engine     | OvidSP                        |
| Dates of database coverage | 1806 to September Week 2 2019 |
| Date search conducted      | 17 September 2019             |
| Total number of hits       | 91                            |

| # | Searches                                                                                                                                                                                                                                                                                                                                                                                                                                                                                                                                                                                                                                                                                                                                                                                                                                                                       | Results   |
|---|--------------------------------------------------------------------------------------------------------------------------------------------------------------------------------------------------------------------------------------------------------------------------------------------------------------------------------------------------------------------------------------------------------------------------------------------------------------------------------------------------------------------------------------------------------------------------------------------------------------------------------------------------------------------------------------------------------------------------------------------------------------------------------------------------------------------------------------------------------------------------------|-----------|
| 1 | asylum* OR displaced OR emigra* OR emigre* OR foreign born OR foreign labor OR foreign labour OR foreign work* OR foreign-born OR foreign-work* OR foreigner* OR immigra* OR migra* OR people of concern OR person of concern OR persons of concern OR refugee* OR smuggl* OR traffick* OR transient* OR transmigrant*                                                                                                                                                                                                                                                                                                                                                                                                                                                                                                                                                         | 112,729   |
| 2 | Asylum seeking [MeSH]                                                                                                                                                                                                                                                                                                                                                                                                                                                                                                                                                                                                                                                                                                                                                                                                                                                          | 487       |
| 3 | Foreign workers [MeSH]                                                                                                                                                                                                                                                                                                                                                                                                                                                                                                                                                                                                                                                                                                                                                                                                                                                         | 530       |
| 4 | Human migration [MeSH]                                                                                                                                                                                                                                                                                                                                                                                                                                                                                                                                                                                                                                                                                                                                                                                                                                                         | 12,788    |
| 5 | Human trafficking [MeSH]                                                                                                                                                                                                                                                                                                                                                                                                                                                                                                                                                                                                                                                                                                                                                                                                                                                       | 844       |
| 6 | Immigration [MeSH]                                                                                                                                                                                                                                                                                                                                                                                                                                                                                                                                                                                                                                                                                                                                                                                                                                                             | 21,250    |
| 7 | Refugees [MeSH]                                                                                                                                                                                                                                                                                                                                                                                                                                                                                                                                                                                                                                                                                                                                                                                                                                                                | 5,580     |
| 8 | 1 OR 2 OR 3 OR 4 OR 5 OR 6 OR 7                                                                                                                                                                                                                                                                                                                                                                                                                                                                                                                                                                                                                                                                                                                                                                                                                                                | 113,572   |
| 9 | abnormalit* OR abortion* OR abscess* OR accident* OR ache* OR aids OR ailment* OR alcohol* OR allerg* OR anorexia OR AMR OR antibiotic resistan* OR antimicrobial resistan* OR anxiet* OR allerg* OR apnoea OR arthritis OR ascariasis OR assault* OR asthma OR attack* OR bacteri* OR bipolar OR bite* OR blastoma* OR bleed* OR blind OR blood OR burn* OR cancer* OR cardio* OR Chagas OR chlamydia OR cholesterol OR coma OR complication* OR condition* OR condom* OR contraception OR cyst* OR dead OR deaf OR death* OR decay OR deform* OR dehydrat* OR dementia OR dengue OR depress* OR diabetes OR diarrhoea OR disabilit* OR disease* OR disorder* OR dracunculiasis OR drug* OR dysfunction* OR eczema OR enlargement* OR epilep* OR exhaust* OR failure OR fatal* OR fatigue OR fever* OR filariasis OR flu OR gall stone* gallstone* OR gonorrhoea OR headache* | 3,197,191 |

|    |                                                                                                                                                                                                                                                                                                                                                                                                                                                                                                                                                                                                                                                                                                                                                                                                                                                                                                                                                                                                                                                                                                                                                                                                                                   |         |
|----|-----------------------------------------------------------------------------------------------------------------------------------------------------------------------------------------------------------------------------------------------------------------------------------------------------------------------------------------------------------------------------------------------------------------------------------------------------------------------------------------------------------------------------------------------------------------------------------------------------------------------------------------------------------------------------------------------------------------------------------------------------------------------------------------------------------------------------------------------------------------------------------------------------------------------------------------------------------------------------------------------------------------------------------------------------------------------------------------------------------------------------------------------------------------------------------------------------------------------------------|---------|
|    | OR health OR healthcare OR hearing loss OR helminth* OR hepatitis OR hernia* OR herpe* OR HIV OR hookworm* OR HPV OR hypertension OR illness* OR indigestion* OR infect* OR inflame* OR injur* OR leishmaniasis OR leprosy OR leukaemia OR leukemia OR lice OR life expectancy OR malaria OR malformat* OR malnutrition OR measles OR medical OR melanoma* OR mental* OR migraine OR miscarriage* OR morbidit* OR mortalit* OR muscl* OR myeloma OR nausea OR neuro* OR nutrition* OR onchocerciasis OR osteoarthritis OR osteoporosis OR pain* OR parasite* OR patient care OR physical activ* OR pneumonia OR poison* OR psoriasis OR psychiatric OR psychos* OR rabies OR rape* OR reproductiv* OR rheuma* OR ringworm* OR sarcoma* OR scabies OR schistosomiasis OR schizophren* OR seizure* OR sepsis* OR sexual* OR shock* OR sick* OR smoking OR sore* OR STD* OR stillbirth* OR stress* OR stroke* OR suicid* OR sunburn* OR syndrome* OR syphilis OR TB OR thrombosis OR tobacco OR STI* OR toothache* OR trachoma OR trauma* OR trichuriasis OR trichomoniasis OR trypanosomiasis OR tuberculosis OR tumor* OR tumour* OR ulcer* OR violence OR virus* OR vomit* OR wart* OR well-being OR wellbeing OR worm* OR wound* |         |
| 10 | Accidents [MeSH]                                                                                                                                                                                                                                                                                                                                                                                                                                                                                                                                                                                                                                                                                                                                                                                                                                                                                                                                                                                                                                                                                                                                                                                                                  | 13,047  |
| 11 | Chronic illness [MeSH]                                                                                                                                                                                                                                                                                                                                                                                                                                                                                                                                                                                                                                                                                                                                                                                                                                                                                                                                                                                                                                                                                                                                                                                                            | 27,898  |
| 12 | “Death and Dying” [MeSH]                                                                                                                                                                                                                                                                                                                                                                                                                                                                                                                                                                                                                                                                                                                                                                                                                                                                                                                                                                                                                                                                                                                                                                                                          | 37,732  |
| 13 | Health [MeSH]                                                                                                                                                                                                                                                                                                                                                                                                                                                                                                                                                                                                                                                                                                                                                                                                                                                                                                                                                                                                                                                                                                                                                                                                                     | 239,359 |
| 14 | Health Behavior [MeSH]                                                                                                                                                                                                                                                                                                                                                                                                                                                                                                                                                                                                                                                                                                                                                                                                                                                                                                                                                                                                                                                                                                                                                                                                            | 29,441  |
| 15 | Health Care Delivery [MeSH]                                                                                                                                                                                                                                                                                                                                                                                                                                                                                                                                                                                                                                                                                                                                                                                                                                                                                                                                                                                                                                                                                                                                                                                                       | 93,926  |
| 16 | Health Care Policy [MeSH]                                                                                                                                                                                                                                                                                                                                                                                                                                                                                                                                                                                                                                                                                                                                                                                                                                                                                                                                                                                                                                                                                                                                                                                                         | 11,882  |
| 17 | Health Care Services [MeSH]                                                                                                                                                                                                                                                                                                                                                                                                                                                                                                                                                                                                                                                                                                                                                                                                                                                                                                                                                                                                                                                                                                                                                                                                       | 199,129 |
| 18 | Health Care Utilization [MeSH]                                                                                                                                                                                                                                                                                                                                                                                                                                                                                                                                                                                                                                                                                                                                                                                                                                                                                                                                                                                                                                                                                                                                                                                                    | 15,311  |
| 19 | Infectious disorders [MeSH]                                                                                                                                                                                                                                                                                                                                                                                                                                                                                                                                                                                                                                                                                                                                                                                                                                                                                                                                                                                                                                                                                                                                                                                                       | 60,085  |
| 20 | Injuries [MeSH]                                                                                                                                                                                                                                                                                                                                                                                                                                                                                                                                                                                                                                                                                                                                                                                                                                                                                                                                                                                                                                                                                                                                                                                                                   | 25,738  |
| 21 | Morbidity [MeSH]                                                                                                                                                                                                                                                                                                                                                                                                                                                                                                                                                                                                                                                                                                                                                                                                                                                                                                                                                                                                                                                                                                                                                                                                                  | 7,010   |
| 22 | Neoplasms [MeSH]                                                                                                                                                                                                                                                                                                                                                                                                                                                                                                                                                                                                                                                                                                                                                                                                                                                                                                                                                                                                                                                                                                                                                                                                                  | 49,460  |
| 23 | Nutritional deficiencies [MeSH]                                                                                                                                                                                                                                                                                                                                                                                                                                                                                                                                                                                                                                                                                                                                                                                                                                                                                                                                                                                                                                                                                                                                                                                                   | 3,952   |
| 24 | Parasitic disorders [MeSH]                                                                                                                                                                                                                                                                                                                                                                                                                                                                                                                                                                                                                                                                                                                                                                                                                                                                                                                                                                                                                                                                                                                                                                                                        | 1,068   |
| 25 | Viral disorders [MeSH]                                                                                                                                                                                                                                                                                                                                                                                                                                                                                                                                                                                                                                                                                                                                                                                                                                                                                                                                                                                                                                                                                                                                                                                                            | 50,123  |

|    |                                                                                                                                                                                                                            |           |
|----|----------------------------------------------------------------------------------------------------------------------------------------------------------------------------------------------------------------------------|-----------|
| 26 | 9 OR 10 OR 11 OR 12 OR 13 OR 14 OR 15 OR 16 OR 17 OR 18 OR 19 OR 20 OR 21<br>OR 22 OR 23 OR 24 OR 25                                                                                                                       | 3,211,923 |
|    |                                                                                                                                                                                                                            |           |
| 27 | Malaysia OR Johor OR Kedah OR Kelantan OR Kuala Lumpur OR Labuan OR<br>Malacca OR Melaka OR Malaya OR Negeri Sembilan OR Pahang OR Penang OR Perak<br>OR Perlis OR Putrajaya OR Sabah OR Sarawak OR Selangor OR Terengganu | 3,636     |
| 28 | Malaysian                                                                                                                                                                                                                  | 1,676     |
| 29 | area* OR Borneo OR city OR cities OR district* OR island* OR isle* OR province*<br>OR region* OR state* OR territor* OR village*                                                                                           | 1,025,257 |
| 30 | 28 AND 29                                                                                                                                                                                                                  | 391       |
| 31 | 27 OR 30                                                                                                                                                                                                                   | 3,727     |
|    |                                                                                                                                                                                                                            |           |
| 32 | 8 AND 26 AND 31                                                                                                                                                                                                            | 91        |
|    |                                                                                                                                                                                                                            |           |
| 33 | Animal migration OR bird migration OR cell* OR membrane* OR molercul*                                                                                                                                                      | 184,060   |
| 34 | 32 NOT 33                                                                                                                                                                                                                  | 91        |

## I.6. Social Policy and Practice

|                            |                            |
|----------------------------|----------------------------|
| Database name              | Social Policy and Practice |
| Database search engine     | OvidSP                     |
| Dates of database coverage | N/A                        |
| Date search conducted      | 17 September 2019          |
| Total number of hits       | 5                          |

| # | Searches                                                                                                                                                                                                                                                                                                                                                                                                                                                                                                                                                                                                                                                                                                                                                                                                                                                                                                                                                                                                                                                                                                                                                                                                                                                                                                                                                                                                                                                                                                                                                                                                                                                                                                                           | Results |
|---|------------------------------------------------------------------------------------------------------------------------------------------------------------------------------------------------------------------------------------------------------------------------------------------------------------------------------------------------------------------------------------------------------------------------------------------------------------------------------------------------------------------------------------------------------------------------------------------------------------------------------------------------------------------------------------------------------------------------------------------------------------------------------------------------------------------------------------------------------------------------------------------------------------------------------------------------------------------------------------------------------------------------------------------------------------------------------------------------------------------------------------------------------------------------------------------------------------------------------------------------------------------------------------------------------------------------------------------------------------------------------------------------------------------------------------------------------------------------------------------------------------------------------------------------------------------------------------------------------------------------------------------------------------------------------------------------------------------------------------|---------|
| 1 | asylum* OR displaced OR emigra* OR emigre* OR foreign born OR foreign labor OR foreign labour OR foreign work* OR foreign-born OR foreign-work* OR foreigner* OR immigra* OR migra* OR people of concern OR person of concern OR persons of concern OR refugee* OR smuggl* OR traffick* OR transient* OR transmigrant*                                                                                                                                                                                                                                                                                                                                                                                                                                                                                                                                                                                                                                                                                                                                                                                                                                                                                                                                                                                                                                                                                                                                                                                                                                                                                                                                                                                                             | 10,050  |
| 2 | abnormalit* OR abortion* OR abscess* OR accident* OR ache* OR aids OR ailment* OR alcohol* OR allerg* OR anorexia OR AMR OR antibiotic resistan* OR antimicrobial resistan* OR anxiet* OR allerg* OR apnoea OR arthritis OR ascariasis OR assault* OR asthma OR attack* OR bacteri* OR bipolar OR bite* OR blastoma* OR bleed* OR blind OR blood OR burn* OR cancer* OR cardio* OR Chagas OR chlamydia OR cholesterol OR coma OR complication* OR condition* OR condom* OR contraception OR cyst* OR dead OR deaf OR death* OR decay OR deform* OR dehydrat* OR dementia OR dengue OR depress* OR diabetes OR diarrhoea OR disabilit* OR disease* OR disorder* OR dracunculiasis OR drug* OR dysfunction* OR eczema OR enlargement* OR epilep* OR exhaust* OR failure OR fatal* OR fatigue OR fever* OR filariasis OR flu OR gall stone* gallstone* OR gonorrhea OR headache* OR health OR healthcare OR hearing loss OR helminth* OR hepatitis OR hernia* OR herpe* OR HIV OR hookworm* OR HPV OR hypertension OR illness* OR indigestion* OR infect* OR inflame* OR injur* OR leishmaniasis OR leprosy OR leukaemia OR leukemia OR lice OR life expectancy OR malaria OR malformat* OR malnutrition OR measles OR medical OR melanoma* OR mental* OR migraine OR miscarriage* OR morbidit* OR mortalit* OR muscl* OR myeloma OR nausea OR neuro* OR nutrition* OR onchocerciasis OR osteoarthritis OR osteoporosis OR pain* OR parasite* OR patient care OR physical activ* OR pneumonia OR poison* OR psoriasis OR psychiatric OR psychos* OR rabies OR rape* OR reproductiv* OR rheuma* OR ringworm* OR sarcoma* OR scabies OR schistosomiasis OR schizophren* OR seizure* OR sepsis* OR sexual* OR shock* OR sick* OR smoking | 197,274 |

|    |                                                                                                                                                                                                                                                                                                                                                                              |        |
|----|------------------------------------------------------------------------------------------------------------------------------------------------------------------------------------------------------------------------------------------------------------------------------------------------------------------------------------------------------------------------------|--------|
|    | OR sore* OR STD* OR stillbirth* OR stress* OR stroke* OR suicid* OR sunburn* OR syndrome* OR syphilis OR TB OR thrombosis OR tobacco OR STI* OR toothache* OR trachoma OR trauma* OR trichuriasis OR trichomoniasis OR trypanosomiasis OR tuberculosis OR tumor* OR tumour* OR ulcer* OR violence OR virus* OR vomit* OR wart* OR well-being OR wellbeing OR worm* OR wound* |        |
|    |                                                                                                                                                                                                                                                                                                                                                                              |        |
| 3  | Malaysia OR Johor OR Kedah OR Kelantan OR Kuala Lumpur OR Labuan OR Malacca OR Melaka OR Malaya OR Negeri Sembilan OR Pahang OR Penang OR Perak OR Perlis OR Putrajaya OR Sabah OR Sarawak OR Selangor OR Terengganu                                                                                                                                                         | 113    |
| 4  | Malaysian                                                                                                                                                                                                                                                                                                                                                                    | 21     |
| 5  | area* OR Borneo OR city OR cities OR district* OR island* OR isle* OR province* OR region* OR state* OR territor* OR village*                                                                                                                                                                                                                                                | 92,897 |
| 6  | 4 AND 5                                                                                                                                                                                                                                                                                                                                                                      | 5      |
| 7  | 3 OR 6                                                                                                                                                                                                                                                                                                                                                                       | 114    |
|    |                                                                                                                                                                                                                                                                                                                                                                              |        |
| 8  | 1 AND 2 AND 7                                                                                                                                                                                                                                                                                                                                                                | 5      |
|    |                                                                                                                                                                                                                                                                                                                                                                              |        |
| 9  | Animal migration OR bird migration OR cell* OR membrane* OR molecu*                                                                                                                                                                                                                                                                                                          | 447    |
| 10 | 8 NOT 9                                                                                                                                                                                                                                                                                                                                                                      | 5      |

**I.7. Summary of the identified records**

| <b>Database</b>          | <b>Hits</b>  |
|--------------------------|--------------|
| Econlit                  | 348          |
| Embase                   | 549          |
| Global Health            | 382          |
| Medline                  | 364          |
| PsycInfo                 | 91           |
| Social Policy & Practice | 5            |
| <b>Total</b>             | <b>1,739</b> |



## Supplementary file 3. Individual scores of the quality assessment

| No. | Reference                      | Study design               | Level of evidence | Answer to the quality appraisal question |   |     |   |   |     |     |   |     |    |    |    |    | Total score | Score in percentage | Quality of the study |
|-----|--------------------------------|----------------------------|-------------------|------------------------------------------|---|-----|---|---|-----|-----|---|-----|----|----|----|----|-------------|---------------------|----------------------|
|     |                                |                            |                   | 1                                        | 2 | 3   | 4 | 5 | 6   | 7   | 8 | 9   | 10 | 11 | 12 | 13 |             |                     |                      |
| 1   | Scheutz et al <sup>33</sup>    | Prevalence                 | Des-3             | V                                        | X | X   | V | V | V   | V   | X | X   | -  | -  | -  | -  | 5/9         | 55.6                | Moderate             |
| 2   | Levy <sup>34</sup>             | Prevalence                 | Des-2             | X                                        | X | V   | X | V | V   | X   | X | V   | -  | -  | -  | -  | 4/9         | 44.4                | Low                  |
| 3   | Kassim et al <sup>35</sup>     | Case series                | Des-3             | X                                        | V | X   | V | X | V   | V   | X | V   | V  | -  | -  | -  | 6/10        | 60.0                | Moderate             |
| 4   | Zulkifli et al <sup>36</sup>   | Analytical cross-sectional | Obs-4             | X                                        | X | N/A | V | V | X   | X   | - | -   | -  | -  | -  | -  | 2/6         | 33.3                | Low                  |
| 5   | Rajeswari et al <sup>37</sup>  | Prevalence                 | Des-3             | X                                        | X | X   | V | X | V   | X   | X | X   | -  | -  | -  | -  | 2/9         | 22.2                | Low                  |
| 6   | Jeyakumar <sup>38</sup>        | Case series                | Des-3             | X                                        | X | X   | V | X | X   | X   | V | V   | V  | -  | -  | -  | 4/10        | 40.0                | Low                  |
| 7   | Jamaiah et al <sup>39</sup>    | Case series                | Des-3             | X                                        | X | X   | V | V | X   | X   | X | V   | V  | -  | -  | -  | 4/10        | 40.0                | Low                  |
| 8   | Krahl & Hashim <sup>40</sup>   | Prevalence                 | Des-3             | V                                        | V | V   | X | V | V   | V   | V | X   | -  | -  | -  | -  | 7/9         | 77.8                | High                 |
| 9   | Zabedah et al <sup>41</sup>    | Prevalence                 | Des-2             | X                                        | X | X   | X | V | V   | X   | X | X   | -  | -  | -  | -  | 2/9         | 22.2                | Low                  |
| 10  | Dony et al <sup>42</sup>       | Prevalence                 | Des-3             | V                                        | V | V   | X | V | X   | X   | V | N/A | -  | -  | -  | -  | 5/8         | 62.5                | Moderate             |
| 11  | Chandran et al <sup>43</sup>   | Case report                | Des-4             | V                                        | X | V   | V | V | N/A | N/A | V | -   | -  | -  | -  | -  | 5/6         | 83.3                | High                 |
| 12  | Nissapatom et al <sup>44</sup> | Prevalence                 | Des-3             | X                                        | X | V   | X | V | V   | X   | V | N/A | -  | -  | -  | -  | 4/8         | 50.0                | Low                  |
| 13  | Sobri et al <sup>45</sup>      | Case series                | Des-3             | X                                        | V | V   | V | V | X   | X   | X | V   | X  | -  | -  | -  | 5/10        | 50.0                | Low                  |
| 14  | Leong <sup>46</sup>            | Prevalence                 | Des-3             | V                                        | X | X   | X | X | V   | V   | V | X   | -  | -  | -  | -  | 4/9         | 44.4                | Low                  |
| 15  | Sasidharan et al <sup>47</sup> | Prevalence                 | Des-2             | V                                        | V | V   | X | V | V   | V   | V | X   | -  | -  | -  | -  | 7/9         | 77.8                | High                 |

|    |                                       |                            |        |   |   |     |   |     |     |     |     |   |   |   |   |   |      |      |          |
|----|---------------------------------------|----------------------------|--------|---|---|-----|---|-----|-----|-----|-----|---|---|---|---|---|------|------|----------|
| 16 | Masitah et al <sup>48</sup>           | Case series                | Des-3  | V | X | X   | X | X   | X   | V   | X   | X | X | - | - | - | 2/9  | 22.2 | Low      |
| 17 | Shailendra & Prepageran <sup>49</sup> | Case report                | Des-4  | V | X | V   | V | V   | V   | X   | V   | - | - | - | - | - | 6/8  | 75.0 | High     |
| 18 | Chan et al <sup>50</sup>              | Analytical cross-sectional | Obs-4  | X | X | N/A | X | X   | X   | X   | -   | - | - | - | - | - | 0/6  | 0.0  | Low      |
| 19 | Farhana et al <sup>51</sup>           | Case series                | Des-3  | X | X | X   | V | V   | V   | V   | X   | V | V | - | - | - | 6/10 | 60.0 | Low      |
| 20 | Chan et al <sup>52</sup>              | Analytical cross-sectional | Obs-4  | X | X | N/A | X | X   | X   | X   | -   | - | - | - | - | - | 0/6  | 0.0  | Low      |
| 21 | Murty <sup>53</sup>                   | Case report                | Des-4  | V | V | V   | V | N/A | N/A | N/A | X   | - | - | - | - | - | 4/5  | 80.0 | High     |
| 22 | Murty et al <sup>54</sup>             | Case series                | Des-3  | X | X | X   | V | X   | X   | V   | N/A | V | V | - | - | - | 4/9  | 44.4 | Low      |
| 23 | Mustafa et al <sup>55</sup>           | Prevalence                 | Des-2  | V | X | X   | X | X   | V   | V   | V   | X | - | - | - | - | 4/9  | 44.4 | Low      |
| 24 | Su et al <sup>56</sup>                | Analytical cross-sectional | Obs-4  | V | X | V   | X | X   | V   | V   | -   | - | - | - | - | - | 4/7  | 57.1 | Moderate |
| 25 | Daher et al <sup>57</sup>             | Prevalence                 | Des-2  | V | V | X   | V | X   | V   | N/A | V   | V | - | - | - | - | 6/8  | 75.0 | High     |
| 26 | Ratnasingam et al <sup>58</sup>       | Prevalence                 | Des-2  | X | X | X   | X | X   | X   | X   | V   | X | - | - | - | - | 1/9  | 11.1 | Low      |
| 27 | Ab Rahman & Abdullah <sup>59</sup>    | Case report                | Des-4  | V | V | V   | V | V   | V   | X   | V   | - | - | - | - | - | 7/8  | 87.5 | High     |
| 28 | Taib & Baba <sup>60</sup>             | Case series                | Des-3  | X | X | X   | V | X   | X   | V   | X   | V | X | - | - | - | 3/10 | 30.0 | Low      |
| 29 | Osman et al <sup>61</sup>             | Prevalence                 | Des-3  | X | X | X   | V | X   | V   | N/A | V   | V | - | - | - | - | 4/8  | 50.0 | Low      |
| 30 | Minhat et al <sup>62</sup>            | Prevalence                 | Des-2  | X | X | X   | X | X   | V   | N/A | X   | V | - | - | - | - | 2/8  | 25.0 | Low      |
| 31 | Mendelsohn et al <sup>63</sup>        | Qualitative                | Qual-2 | V | V | V   | V | V   | X   | V   | V   | V | V | - | - | - | 9/10 | 90.0 | High     |
| 32 | Mendelsohn et al <sup>64</sup>        | Analytical cross-sectional | Obs-4  | V | V | N/A | V | V   | X   | V   | -   | - | - | - | - | - | 5/6  | 83.3 | High     |

|    |                                 |                            |       |   |   |     |   |   |   |   |   |     |   |   |   |   |      |      |          |
|----|---------------------------------|----------------------------|-------|---|---|-----|---|---|---|---|---|-----|---|---|---|---|------|------|----------|
| 33 | Kwan et al <sup>65</sup>        | Case series                | Des-3 | X | V | X   | V | X | X | V | X | X   | V | - | - | - | 4/10 | 40.0 | Low      |
| 34 | Santos et al <sup>66</sup>      | Prevalence                 | Des-3 | X | X | X   | X | V | V | V | V | V   | - | - | - | - | 5/9  | 55.6 | Moderate |
| 35 | Razali et al <sup>67</sup>      | Case series                | Des-3 | V | V | V   | V | X | V | V | X | V   | V | - | - | - | 8/10 | 80.0 | High     |
| 36 | Elmi et al <sup>68</sup>        | Case control               | Obs-3 | X | V | V   | X | V | X | V | X | X   | V | - | - | - | 5/10 | 50.0 | Low      |
| 37 | Santos et al <sup>69</sup>      | Prevalence                 | Des-2 | X | X | X   | X | V | V | V | X | V   | - | - | - | - | 4/9  | 44.4 | Low      |
| 38 | William et al <sup>70</sup>     | Prevalence                 | Des-2 | V | V | V   | X | V | V | V | V | X   | - | - | - | - | 7/9  | 77.8 | High     |
| 39 | Siah et al <sup>71</sup>        | Prevalence                 | Des-2 | X | X | X   | X | X | V | X | X | X   | - | - | - | - | 1/9  | 11.1 | Low      |
| 40 | Guinto et al <sup>72</sup>      | Scoping review             | -     | - | - | -   | - | - | - | - | - | -   | - | - | - | - | -    | -    | -        |
| 41 | Vijjian et al <sup>73</sup>     | Analytical cross-sectional | Obs-4 | V | X | N/A | X | X | X | X | - | -   | - | - | - | - | 1/6  | 16.7 | Low      |
| 42 | Azian et al <sup>74</sup>       | Prevalence                 | Des-2 | X | X | X   | X | X | V | X | X | X   | - | - | - | - | 1/9  | 11.1 | Low      |
| 43 | Sahimin et al <sup>75</sup>     | Prevalence                 | Des-2 | X | X | X   | X | X | V | V | V | X   | - | - | - | - | 3/9  | 33.3 | Low      |
| 44 | Noh et al <sup>76</sup>         | Prevalence                 | Des-2 | X | X | X   | X | X | V | X | V | X   | - | - | - | - | 2/9  | 22.2 | Low      |
| 45 | Kamaludin & How <sup>77</sup>   | Analytical cross-sectional | Obs-4 | V | X | N/A | X | X | V | V | - | -   | - | - | - | - | 3/6  | 50.0 | Low      |
| 46 | Min et al <sup>78</sup>         | Prevalence                 | Des-3 | V | V | V   | X | V | X | X | V | N/A | - | - | - | - | 5/8  | 62.5 | Moderate |
| 47 | Woh et al <sup>79</sup>         | Prevalence                 | Des-3 | X | X | X   | V | V | V | X | V | X   | - | - | - | - | 4/9  | 44.4 | Low      |
| 48 | Tanabe et al <sup>80</sup>      | Mixed method               | -     | - | - | -   | - | - | - | - | - | -   | - | - | - | - | -    | -    | -        |
| 49 | Ratnalingam et al <sup>81</sup> | Prevalence                 | Des-2 | V | X | X   | X | V | V | X | X | X   | - | - | - | - | 3/9  | 33.3 | Low      |

|    |                                |                             |        |   |   |   |   |   |   |   |   |   |   |   |   |   |      |      |          |
|----|--------------------------------|-----------------------------|--------|---|---|---|---|---|---|---|---|---|---|---|---|---|------|------|----------|
| 50 | Woh et al <sup>82</sup>        | Prevalence                  | Des-2  | X | X | X | X | X | V | X | V | X | - | - | - | - | 2/9  | 22.2 | Low      |
| 51 | Noor & Shaker <sup>83</sup>    | Analytical cross-sectional  | Obs-4  | V | X | V | V | V | V | V | - | - | - | - | - | - | 6/7  | 85.7 | High     |
| 52 | Noordin et al <sup>84</sup>    | Prevalence                  | Des-3  | X | X | X | X | V | V | X | V | X | - | - | - | - | 3/9  | 33.3 | Low      |
| 53 | Sahimin et al <sup>85</sup>    | Prevalence                  | Des-2  | X | X | X | V | X | V | V | V | X | - | - | - | - | 4/9  | 44.4 | Low      |
| 54 | Labao et al <sup>86</sup>      | Prevalence                  | Des-3  | X | X | X | X | V | V | V | V | V | - | - | - | - | 5/9  | 55.6 | Moderate |
| 55 | Shaw et al <sup>87</sup>       | Randomised controlled trial | Exp-2  | X | X | X | X | X | X | X | X | V | V | V | V | X | 4/13 | 30.8 | Low      |
| 56 | Rahman et al <sup>88</sup>     | Case control                | Obs-3  | X | V | V | X | V | X | V | X | V | V | - | - | - | 6/10 | 60.0 | Moderate |
| 57 | Sahimin et al <sup>89</sup>    | Prevalence                  | Des-2  | X | X | X | V | X | V | V | V | X | - | - | - | - | 4/9  | 44.4 | Low      |
| 58 | Nwabichie et al <sup>90</sup>  | Prevalence                  | Des-2  | V | V | X | X | V | V | V | V | V | - | - | - | - | 7/9  | 77.8 | High     |
| 59 | Jeffree et al <sup>91</sup>    | Case control                | Obs-3  | X | V | V | X | V | X | X | V | V | V | - | - | - | 6/10 | 60.0 | Moderate |
| 60 | Zerguine et al <sup>92</sup>   | Analytical cross-sectional  | Obs-4  | X | V | V | X | X | V | V | - | - | - | - | - | - | 4/7  | 57.1 | Moderate |
| 61 | Ya'acob et al <sup>93</sup>    | Randomised controlled Trial | Exp-2  | X | X | V | X | X | X | V | X | X | V | V | V | X | 5/13 | 38.5 | Low      |
| 62 | Chuah et al <sup>9</sup>       | Qualitative                 | Qual-2 | V | V | V | V | V | X | V | X | V | V | - | - | - | 8/10 | 80.0 | High     |
| 63 | Loganathan et al <sup>94</sup> | Qualitative                 | Qual-2 | X | V | V | V | V | X | V | V | V | V | - | - | - | 8/10 | 80.0 | High     |
| 64 | Rahman et al <sup>95</sup>     | Prevalence                  | Des-3  | X | X | X | X | V | X | X | V | V | - | - | - | - | 3/9  | 33.3 | Low      |
| 65 | Siah et al <sup>96</sup>       | Qualitative                 | Qual-3 | X | V | X | V | V | X | X | X | V | V | - | - | - | 5/10 | 50.0 | Low      |
| 66 | Sahimin et al <sup>97</sup>    | Prevalence                  | Des-2  | X | X | X | V | X | V | X | V | X | - | - | - | - | 3/9  | 33.3 | Low      |

|    |                           |             |        |   |   |   |   |   |   |   |   |   |   |   |   |   |      |      |      |
|----|---------------------------|-------------|--------|---|---|---|---|---|---|---|---|---|---|---|---|---|------|------|------|
| 67 | Chuah et al <sup>98</sup> | Qualitative | Qual-2 | V | V | V | V | V | X | V | X | V | V | - | - | - | 8/10 | 80.0 | High |
|----|---------------------------|-------------|--------|---|---|---|---|---|---|---|---|---|---|---|---|---|------|------|------|

1  
2  
3  
4  
5  
6  
7  
8  
9  
10  
11  
12  
13  
14  
15  
16  
17  
18  
19  
20  
21  
22  
23  
24  
25  
26  
27  
28  
29  
30  
31  
32  
33  
34  
35  
36  
37  
38  
39  
40  
41  
42  
43  
44  
45  
46

For peer review only
