# Supplementary material for: Developing an evidence assessment framework and appraising the academic literature on migrant health in Malaysia: a scoping review
Source: PubMed Central journal article supplement — BMJ Open. 2021 Jan 18;11(1):e041379. doi: 10.1136/bmjopen-2020-041379 (PMC7813391; doi:10.1136/bmjopen-2020-041379), 2021-01-18
Supplement: bmjopen-2020-041379supp002.pdf [file bmjopen-2020-041379supp002.pdf]

## Supplementary file 2. Detailed search strategy

### I.1. EconLit

|                            |                            |
|----------------------------|----------------------------|
| Database name              | EconLit                    |
| Database search engine     | OvidSP                     |
| Dates of database coverage | 1886 to September 12, 2019 |
| Date search conducted      | 17 September 2019          |
| Total number of hits       | 348                        |

| # | Searches                                                                                                                                                                                                                                                                                                                                                                                                                                                                                                                                                                                                                                                                                                                                                                                                                                                                                                                                                                                                                                                                                                                                                                                                                                                                                                                                                                                                                                                                                               | Results |
|---|--------------------------------------------------------------------------------------------------------------------------------------------------------------------------------------------------------------------------------------------------------------------------------------------------------------------------------------------------------------------------------------------------------------------------------------------------------------------------------------------------------------------------------------------------------------------------------------------------------------------------------------------------------------------------------------------------------------------------------------------------------------------------------------------------------------------------------------------------------------------------------------------------------------------------------------------------------------------------------------------------------------------------------------------------------------------------------------------------------------------------------------------------------------------------------------------------------------------------------------------------------------------------------------------------------------------------------------------------------------------------------------------------------------------------------------------------------------------------------------------------------|---------|
| 1 | asylum* OR displaced OR emigra* OR emigre* OR foreign born OR foreign labor OR foreign labour OR foreign work* OR foreign-born OR foreign-work* OR foreigner* OR immigra* OR migra* OR people of concern OR person of concern OR persons of concern OR refugee* OR smuggl* OR traffick* OR transient* OR transmigrant*                                                                                                                                                                                                                                                                                                                                                                                                                                                                                                                                                                                                                                                                                                                                                                                                                                                                                                                                                                                                                                                                                                                                                                                 | 120,090 |
| 2 | abnormalit* OR abortion* OR abscess* OR accident* OR ache* OR aids OR ailment* OR alcohol* OR allerg* OR anorexia OR AMR OR antibiotic resistan* OR antimicrobial resistan* OR anxiet* OR allerg* OR apnoea OR arthritis OR ascariasis OR assault* OR asthma OR attack* OR bacteri* OR bipolar OR bite* OR blastoma* OR bleed* OR blind OR blood OR burn* OR cancer* OR cardio* OR Chagas OR chlamydia OR cholesterol OR coma OR complication* OR condition* OR condom* OR contraception OR cyst* OR dead OR deaf OR death* OR decay OR deform* OR dehydrat* OR dementia OR dengue OR depress* OR diabetes OR diarrhoea OR disabilit* OR disease* OR disorder* OR dracunculiasis OR drug* OR dysfunction* OR eczema OR enlargement* OR epilep* OR exhaust* OR failure OR fatal* OR fatigue OR fever* OR filariasis OR flu OR gall stone* gallstone* OR gonorrhoea OR headache* OR health OR healthcare OR hearing loss OR helminth* OR hepatitis OR hernia* OR herpe* OR HIV OR hookworm* OR HPV OR hypertension OR illness* OR indigestion* OR infect* OR inflame* OR injur* OR leishmaniasis OR leprosy OR leukaemia OR leukemia OR lice OR life expectancy OR malaria OR malformat* malnutrition OR measles OR medical OR melanoma* OR mental* OR migraine OR miscarriage* OR morbidit* OR mortalit* OR muscl* OR myeloma OR nausea OR neuro* OR nutrition* OR onchocerciasis OR osteoarthritis OR osteoporosis OR pain* OR parasite* OR patient care OR physical activ* OR pneumonia OR poison* OR | 373,019 |

|    |                                                                                                                                                                                                                                                                                                                                                                                                                                                                                                                                                                                                        |         |
|----|--------------------------------------------------------------------------------------------------------------------------------------------------------------------------------------------------------------------------------------------------------------------------------------------------------------------------------------------------------------------------------------------------------------------------------------------------------------------------------------------------------------------------------------------------------------------------------------------------------|---------|
|    | psoriasis OR psychiatric OR psychos* OR rabies OR rape* OR reproductiv* OR rheuma* OR ringworm* OR sarcoma* OR scabies OR schistosomiasis OR schizophren* OR seizure* OR sepsis* OR sexual* OR shock* OR sick* OR smoking OR sore* OR STD* OR stillbirth* OR stress* OR stroke* OR suicid* OR sunburn* OR syndrome* OR syphilis OR TB OR thrombosis OR tobacco OR STI* OR toothache* OR trachoma OR trauma* OR trichuriasis OR trichomoniasis OR trypanosomiasis OR tuberculosis OR tumor* OR tumour* OR ulcer* OR violence OR virus* OR vomit* OR wart* OR well-being OR wellbeing OR worm* OR wound* |         |
|    |                                                                                                                                                                                                                                                                                                                                                                                                                                                                                                                                                                                                        |         |
| 3  | Malaysia OR Johor OR Kedah OR Kelantan OR Kuala Lumpur OR Labuan OR Malacca OR Melaka OR Malaya OR Negeri Sembilan OR Pahang OR Penang OR Perak OR Perlis OR Putrajaya OR Sabah OR Sarawak OR Selangor OR Terengganu                                                                                                                                                                                                                                                                                                                                                                                   | 6,883   |
| 4  | Malaysian                                                                                                                                                                                                                                                                                                                                                                                                                                                                                                                                                                                              | 1,654   |
| 5  | area* OR Borneo OR city OR cities OR district* OR island* OR isle* OR province* OR region* OR state* OR territor* OR village*                                                                                                                                                                                                                                                                                                                                                                                                                                                                          | 367,269 |
| 6  | 4 AND 5                                                                                                                                                                                                                                                                                                                                                                                                                                                                                                                                                                                                | 361     |
| 7  | 3 OR 6                                                                                                                                                                                                                                                                                                                                                                                                                                                                                                                                                                                                 | 6,925   |
|    |                                                                                                                                                                                                                                                                                                                                                                                                                                                                                                                                                                                                        |         |
| 8  | 1 AND 2 AND 7                                                                                                                                                                                                                                                                                                                                                                                                                                                                                                                                                                                          | 348     |
|    |                                                                                                                                                                                                                                                                                                                                                                                                                                                                                                                                                                                                        |         |
| 9  | Animal migration OR bird migration OR cell* OR membrane* OR molecul*                                                                                                                                                                                                                                                                                                                                                                                                                                                                                                                                   | 2,622   |
| 10 | 8 NOT 9                                                                                                                                                                                                                                                                                                                                                                                                                                                                                                                                                                                                | 348     |

**I.2. Embase**

|                            |                           |
|----------------------------|---------------------------|
| Database name              | Embase                    |
| Database search engine     | OvidSP                    |
| Dates of database coverage | 1947 to 2019 September 13 |
| Date search conducted      | 17 September 2019         |
| Total number of hits       | 549                       |

| #  | Searches                                                                                                                                                                                                                                                                                                               | Results    |
|----|------------------------------------------------------------------------------------------------------------------------------------------------------------------------------------------------------------------------------------------------------------------------------------------------------------------------|------------|
| 1  | asylum* OR displaced OR emigra* OR emigre* OR foreign born OR foreign labor OR foreign labour OR foreign work* OR foreign-born OR foreign-work* OR foreigner* OR immigra* OR migra* OR people of concern OR person of concern OR persons of concern OR refugee* OR smuggl* OR traffick* OR transient* OR transmigrant* | 1,124,805  |
| 2  | asylum seeker [MeSH]                                                                                                                                                                                                                                                                                                   | 793        |
| 3  | emigrant [MeSH]                                                                                                                                                                                                                                                                                                        | 293        |
| 4  | foreign worker [MeSH]                                                                                                                                                                                                                                                                                                  | 5,306      |
| 5  | human trafficking [MeSH]                                                                                                                                                                                                                                                                                               | 697        |
| 6  | migrant worker [MeSH]                                                                                                                                                                                                                                                                                                  | 1,548      |
| 7  | migrant [MeSH]                                                                                                                                                                                                                                                                                                         | 35,567     |
| 8  | migration [MeSH]                                                                                                                                                                                                                                                                                                       | 45,436     |
| 9  | immigrant [MeSH]                                                                                                                                                                                                                                                                                                       | 16,376     |
| 10 | refugee [MeSH]                                                                                                                                                                                                                                                                                                         | 12,425     |
| 11 | refugee camp [MeSH]                                                                                                                                                                                                                                                                                                    | 553        |
| 12 | undocumented immigrant [MeSH]                                                                                                                                                                                                                                                                                          | 350        |
| 13 | 1 OR 2 OR 3 OR 4 OR 5 OR 6 OR 7 OR 8 OR 9 OR 10 OR 11 OR 12                                                                                                                                                                                                                                                            | 1,125,119  |
|    |                                                                                                                                                                                                                                                                                                                        |            |
| 14 | abnormalit* OR abortion* OR abscess* OR accident* OR ache* OR aids OR ailment* OR alcohol* OR allerg* OR anorexia OR AMR OR antibiotic resistan* OR antimicrobial resistan* OR anxiet* OR allerg* OR apnoea OR arthritis OR ascariasis OR assault* OR asthma OR attack* OR bacteri* OR bipolar OR bite* OR blastoma*   | 31,271,711 |

|    |                                                                                                                                                                                                                                                                                                                                                                                                                                                                                                                                                                                                                                                                                                                                                                                                                                                                                                                                                                                                                                                                                                                                                                                                                                                                                                                                                                                                                                                                                                                                                                                                                                                                                                                                                                                         |            |
|----|-----------------------------------------------------------------------------------------------------------------------------------------------------------------------------------------------------------------------------------------------------------------------------------------------------------------------------------------------------------------------------------------------------------------------------------------------------------------------------------------------------------------------------------------------------------------------------------------------------------------------------------------------------------------------------------------------------------------------------------------------------------------------------------------------------------------------------------------------------------------------------------------------------------------------------------------------------------------------------------------------------------------------------------------------------------------------------------------------------------------------------------------------------------------------------------------------------------------------------------------------------------------------------------------------------------------------------------------------------------------------------------------------------------------------------------------------------------------------------------------------------------------------------------------------------------------------------------------------------------------------------------------------------------------------------------------------------------------------------------------------------------------------------------------|------------|
|    | OR bleed* OR blind OR blood OR burn* OR cancer* OR cardio* OR Chagas OR chlamydia OR cholesterol OR coma OR complication* OR condition* OR condom* OR contraception OR cyst* OR dead OR deaf OR death* OR decay OR deform* OR dehydrat* OR dementia OR dengue OR depress* OR diabetes OR diarrhoea OR disabilit* OR disease* OR disorder* OR dracunculiasis OR drug* OR dysfunction* OR eczema OR enlargement* OR epilep* OR exhaust* OR failure OR fatal* OR fatigue OR fever* OR filariasis OR flu OR gall stone* gallstone* OR gonorrhea OR headache* OR health OR healthcare OR hearing loss OR helminth* OR hepatitis OR hernia* OR herpe* OR HIV OR hookworm* OR HPV OR hypertension OR illness* OR indigestion* OR infect* OR inflame* OR injur* OR leishmaniasis OR leprosy OR leukaemia OR leukemia OR lice OR life expectancy OR malaria OR malformat* malnutrition OR measles OR medical OR melanoma* OR mental* OR migraine OR miscarriage* OR morbidit* OR mortalit* OR muscl* OR myeloma OR nausea OR neuro* OR nutrition* OR onchocerciasis OR osteoarthritis OR osteoporosis OR pain* OR parasite* OR patient care OR physical activ* OR pneumonia OR poison* OR psoriasis OR psychiatric OR psychos* OR rabies OR rape* OR reproductiv* OR rheuma* OR ringworm* OR sarcoma* OR scabies OR schistosomiasis OR schizophren* OR seizure* OR sepsis* OR sexual* OR shock* OR sick* OR smoking OR sore* OR STD* OR stillbirth* OR stress* OR stroke* OR suicid* OR sunburn* OR syndrome* OR syphilis OR TB OR thrombosis OR tobacco OR STI* OR toothache* OR trachoma OR trauma* OR trichuriasis OR trichomoniasis OR trypanosomiasis OR tuberculosis OR tumor* OR tumour* OR ulcer* OR violence OR virus* OR vomit* OR wart* OR well-being OR wellbeing OR worm* OR wound* |            |
| 15 | accident [MeSH]                                                                                                                                                                                                                                                                                                                                                                                                                                                                                                                                                                                                                                                                                                                                                                                                                                                                                                                                                                                                                                                                                                                                                                                                                                                                                                                                                                                                                                                                                                                                                                                                                                                                                                                                                                         | 209,815    |
| 16 | diseases [MeSH]                                                                                                                                                                                                                                                                                                                                                                                                                                                                                                                                                                                                                                                                                                                                                                                                                                                                                                                                                                                                                                                                                                                                                                                                                                                                                                                                                                                                                                                                                                                                                                                                                                                                                                                                                                         | 23,553,673 |
| 17 | health [MeSH]                                                                                                                                                                                                                                                                                                                                                                                                                                                                                                                                                                                                                                                                                                                                                                                                                                                                                                                                                                                                                                                                                                                                                                                                                                                                                                                                                                                                                                                                                                                                                                                                                                                                                                                                                                           | 688,819    |
| 18 | health behavior [MeSH]                                                                                                                                                                                                                                                                                                                                                                                                                                                                                                                                                                                                                                                                                                                                                                                                                                                                                                                                                                                                                                                                                                                                                                                                                                                                                                                                                                                                                                                                                                                                                                                                                                                                                                                                                                  | 396,908    |
| 19 | health care [MeSH]                                                                                                                                                                                                                                                                                                                                                                                                                                                                                                                                                                                                                                                                                                                                                                                                                                                                                                                                                                                                                                                                                                                                                                                                                                                                                                                                                                                                                                                                                                                                                                                                                                                                                                                                                                      | 5,107,719  |
| 20 | health care facility [MeSH]                                                                                                                                                                                                                                                                                                                                                                                                                                                                                                                                                                                                                                                                                                                                                                                                                                                                                                                                                                                                                                                                                                                                                                                                                                                                                                                                                                                                                                                                                                                                                                                                                                                                                                                                                             | 1,641,961  |
| 21 | health care policy [MeSH]                                                                                                                                                                                                                                                                                                                                                                                                                                                                                                                                                                                                                                                                                                                                                                                                                                                                                                                                                                                                                                                                                                                                                                                                                                                                                                                                                                                                                                                                                                                                                                                                                                                                                                                                                               | 188,812    |
| 22 | health service [MeSH]                                                                                                                                                                                                                                                                                                                                                                                                                                                                                                                                                                                                                                                                                                                                                                                                                                                                                                                                                                                                                                                                                                                                                                                                                                                                                                                                                                                                                                                                                                                                                                                                                                                                                                                                                                   | 5,405,209  |
| 23 | infection [MeSH]                                                                                                                                                                                                                                                                                                                                                                                                                                                                                                                                                                                                                                                                                                                                                                                                                                                                                                                                                                                                                                                                                                                                                                                                                                                                                                                                                                                                                                                                                                                                                                                                                                                                                                                                                                        | 3,626,633  |
| 24 | injury [MeSH]                                                                                                                                                                                                                                                                                                                                                                                                                                                                                                                                                                                                                                                                                                                                                                                                                                                                                                                                                                                                                                                                                                                                                                                                                                                                                                                                                                                                                                                                                                                                                                                                                                                                                                                                                                           | 2,303,491  |
| 25 | malnutrition [MeSH]                                                                                                                                                                                                                                                                                                                                                                                                                                                                                                                                                                                                                                                                                                                                                                                                                                                                                                                                                                                                                                                                                                                                                                                                                                                                                                                                                                                                                                                                                                                                                                                                                                                                                                                                                                     | 178,039    |

|    |                                                                                                                                                                                                                      |            |
|----|----------------------------------------------------------------------------------------------------------------------------------------------------------------------------------------------------------------------|------------|
| 26 | morbidity [MeSH]                                                                                                                                                                                                     | 361,003    |
| 27 | mortality [MeSH]                                                                                                                                                                                                     | 1,081,969  |
| 28 | neoplasm [MeSH]                                                                                                                                                                                                      | 4,683,051  |
| 29 | parasite [MeSH]                                                                                                                                                                                                      | 36,154     |
| 30 | virus [MeSH]                                                                                                                                                                                                         | 907,130    |
| 31 | 14 OR 15 OR 16 OR 17 OR 18 OR 19 OR 20 OR 21 OR 21 OR 22 OR 23 OR 24 OR 25 OR 26 OR 27 OR 28 OR 29 OR 30                                                                                                             | 32,849,152 |
|    |                                                                                                                                                                                                                      |            |
| 32 | Malaysia OR Johor OR Kedah OR Kelantan OR Kuala Lumpur OR Labuan OR Malacca OR Melaka OR Malaya OR Negeri Sembilan OR Pahang OR Penang OR Perak OR Perlis OR Putrajaya OR Sabah OR Sarawak OR Selangor OR Terengganu | 28,901     |
| 33 | Malaysian                                                                                                                                                                                                            | 1,611      |
| 34 | area* OR Borneo OR city OR cities OR district* OR island* OR isle* OR province* OR region* OR state* OR territor* OR village*                                                                                        | 7,357,992  |
| 35 | 33 AND 34                                                                                                                                                                                                            | 395        |
| 36 | 32 OR 35                                                                                                                                                                                                             | 29,057     |
|    |                                                                                                                                                                                                                      |            |
| 37 | 13 AND 31 AND 36                                                                                                                                                                                                     | 651        |
|    |                                                                                                                                                                                                                      |            |
| 38 | Animal migration OR bird migration OR cell* OR membrane* OR molecu*                                                                                                                                                  | 10,280,170 |
| 39 | 37 NOT 38                                                                                                                                                                                                            | 549        |

### I.3. Global Health

|                            |                      |
|----------------------------|----------------------|
| Database name              | Global Health        |
| Database search engine     | OvidSP               |
| Dates of database coverage | 1910 to 2019 Week 36 |
| Date search conducted      | 17 September 2019    |
| Total number of hits       | 382                  |

| # | Searches                                                                                                                                                                                                                                                                                                                                                                                                                                                                                                                                                                                                                                                                                                                                                                                                                                                                                                                                                                                                                        | Results   |
|---|---------------------------------------------------------------------------------------------------------------------------------------------------------------------------------------------------------------------------------------------------------------------------------------------------------------------------------------------------------------------------------------------------------------------------------------------------------------------------------------------------------------------------------------------------------------------------------------------------------------------------------------------------------------------------------------------------------------------------------------------------------------------------------------------------------------------------------------------------------------------------------------------------------------------------------------------------------------------------------------------------------------------------------|-----------|
| 1 | asylum* OR displaced OR emigra* OR emigre* OR foreign born OR foreign labor OR foreign labour OR foreign work* OR foreign-born OR foreign-work* OR foreigner* OR immigra* OR migra* OR people of concern OR person of concern OR persons of concern OR refugee* OR smuggl* OR traffick* OR transient* OR transmigrant*                                                                                                                                                                                                                                                                                                                                                                                                                                                                                                                                                                                                                                                                                                          | 89,712    |
| 2 | immigrants [MeSH]                                                                                                                                                                                                                                                                                                                                                                                                                                                                                                                                                                                                                                                                                                                                                                                                                                                                                                                                                                                                               | 7,830     |
| 3 | migrant labour [MeSH]                                                                                                                                                                                                                                                                                                                                                                                                                                                                                                                                                                                                                                                                                                                                                                                                                                                                                                                                                                                                           | 1,006     |
| 4 | migrants [MeSH]                                                                                                                                                                                                                                                                                                                                                                                                                                                                                                                                                                                                                                                                                                                                                                                                                                                                                                                                                                                                                 | 3,576     |
| 5 | migration [MeSH]                                                                                                                                                                                                                                                                                                                                                                                                                                                                                                                                                                                                                                                                                                                                                                                                                                                                                                                                                                                                                | 3,819     |
| 6 | refugees [MeSH]                                                                                                                                                                                                                                                                                                                                                                                                                                                                                                                                                                                                                                                                                                                                                                                                                                                                                                                                                                                                                 | 3,687     |
| 7 | 1 OR 2 OR 3 OR 4 OR 5 OR 6                                                                                                                                                                                                                                                                                                                                                                                                                                                                                                                                                                                                                                                                                                                                                                                                                                                                                                                                                                                                      | 89,712    |
| 8 | abnormalit* OR abortion* OR abscess* OR accident* OR ache* OR aids OR ailment* OR alcohol* OR allerg* OR anorexia OR AMR OR antibiotic resistan* OR antimicrobial resistan* OR anxiet* OR allerg* OR apnoea OR arthritis OR ascariasis OR assault* OR asthma OR attack* OR bacteri* OR bipolar OR bite* OR blastoma* OR bleed* OR blind OR blood OR burn* OR cancer* OR cardio* OR Chagas OR chlamydia OR cholesterol OR coma OR complication* OR condition* OR condom* OR contraception OR cyst* OR dead OR deaf OR death* OR decay OR deform* OR dehydrat* OR dementia OR dengue OR depress* OR diabetes OR diarrhoea OR disabilit* OR disease* OR disorder* OR dracunculiasis OR drug* OR dysfunction* OR eczema OR enlargement* OR epilep* OR exhaust* OR failure OR fatal* OR fatigue OR fever* OR filariasis OR flu OR gall stone* gallstone* OR gonorrhoea OR headache* OR health OR healthcare OR hearing loss OR helminth* OR hepatitis OR hernia* OR herpe* OR HIV OR hookworm* OR HPV OR hypertension OR illness* OR | 3,675,317 |

|    |                                                                                                                                                                                                                                                                                                                                                                                                                                                                                                                                                                                                                                                                                                                                                                                                                                                                                                                                                                                                                                                                                  |           |
|----|----------------------------------------------------------------------------------------------------------------------------------------------------------------------------------------------------------------------------------------------------------------------------------------------------------------------------------------------------------------------------------------------------------------------------------------------------------------------------------------------------------------------------------------------------------------------------------------------------------------------------------------------------------------------------------------------------------------------------------------------------------------------------------------------------------------------------------------------------------------------------------------------------------------------------------------------------------------------------------------------------------------------------------------------------------------------------------|-----------|
|    | indigestion* OR infect* OR inflame* OR injur* OR leishmaniasis OR leprosy OR leukaemia OR leukemia OR lice OR life expectancy OR malaria OR malformat* OR malnutrition OR measles OR medical OR melanoma* OR mental* OR migraine OR miscarriage* OR morbidit* OR mortalit* OR muscl* OR myeloma OR nausea OR neuro* OR nutrition* OR onchocerciasis OR osteoarthritis OR osteoporosis OR pain* OR parasite* OR patient care OR physical activ* OR pneumonia OR poison* OR psoriasis OR psychiatric OR psychos* OR rabies OR rape* OR reproductiv* OR rheuma* OR ringworm* OR sarcoma* OR scabies OR schistosomiasis OR schizophren* OR seizure* OR sepsis* OR sexual* OR shock* OR sick* OR smoking OR sore* OR STD* OR stillbirth* OR stress* OR stroke* OR suicid* OR sunburn* OR syndrome* OR syphilis OR TB OR thrombosis OR tobacco OR STI* OR toothache* OR trachoma OR trauma* OR trichuriasis OR trichomoniasis OR trypanosomiasis OR tuberculosis OR tumor* OR tumour* OR ulcer* OR violence OR virus* OR vomit* OR wart* OR well-being OR wellbeing OR worm* OR wound* |           |
| 9  | accidents [MeSH]                                                                                                                                                                                                                                                                                                                                                                                                                                                                                                                                                                                                                                                                                                                                                                                                                                                                                                                                                                                                                                                                 | 14,359    |
| 10 | diseases [MeSH]                                                                                                                                                                                                                                                                                                                                                                                                                                                                                                                                                                                                                                                                                                                                                                                                                                                                                                                                                                                                                                                                  | 2,302,791 |
| 11 | health [MeSH]                                                                                                                                                                                                                                                                                                                                                                                                                                                                                                                                                                                                                                                                                                                                                                                                                                                                                                                                                                                                                                                                    | 283,009   |
| 12 | health behaviour [MeSH]                                                                                                                                                                                                                                                                                                                                                                                                                                                                                                                                                                                                                                                                                                                                                                                                                                                                                                                                                                                                                                                          | 11,560    |
| 13 | health care [MeSH]                                                                                                                                                                                                                                                                                                                                                                                                                                                                                                                                                                                                                                                                                                                                                                                                                                                                                                                                                                                                                                                               | 91,876    |
| 14 | health policy [MeSH]                                                                                                                                                                                                                                                                                                                                                                                                                                                                                                                                                                                                                                                                                                                                                                                                                                                                                                                                                                                                                                                             | 20,150    |
| 15 | health services [MeSH]                                                                                                                                                                                                                                                                                                                                                                                                                                                                                                                                                                                                                                                                                                                                                                                                                                                                                                                                                                                                                                                           | 88,605    |
| 16 | infection [MeSH]                                                                                                                                                                                                                                                                                                                                                                                                                                                                                                                                                                                                                                                                                                                                                                                                                                                                                                                                                                                                                                                                 | 100,189   |
| 17 | injuries [MeSH]                                                                                                                                                                                                                                                                                                                                                                                                                                                                                                                                                                                                                                                                                                                                                                                                                                                                                                                                                                                                                                                                  | 3,171     |
| 18 | malnutrition [MeSH]                                                                                                                                                                                                                                                                                                                                                                                                                                                                                                                                                                                                                                                                                                                                                                                                                                                                                                                                                                                                                                                              | 28,215    |
| 19 | morbidity [MeSH]                                                                                                                                                                                                                                                                                                                                                                                                                                                                                                                                                                                                                                                                                                                                                                                                                                                                                                                                                                                                                                                                 | 28,845    |
| 20 | mortality [MeSH]                                                                                                                                                                                                                                                                                                                                                                                                                                                                                                                                                                                                                                                                                                                                                                                                                                                                                                                                                                                                                                                                 | 135,836   |
| 21 | neoplasm [MeSH]                                                                                                                                                                                                                                                                                                                                                                                                                                                                                                                                                                                                                                                                                                                                                                                                                                                                                                                                                                                                                                                                  | 225,495   |
| 22 | parasites [MeSH]                                                                                                                                                                                                                                                                                                                                                                                                                                                                                                                                                                                                                                                                                                                                                                                                                                                                                                                                                                                                                                                                 | 488,622   |
| 23 | viruses [MeSH]                                                                                                                                                                                                                                                                                                                                                                                                                                                                                                                                                                                                                                                                                                                                                                                                                                                                                                                                                                                                                                                                   | 496,168   |
| 24 | 8 OR 9 OR 10 OR 11 OR 12 OR 13 OR 14 OR 15 OR 16 OR 17 OR 18 OR 19 OR 20 OR 21 OR 22 OR 23                                                                                                                                                                                                                                                                                                                                                                                                                                                                                                                                                                                                                                                                                                                                                                                                                                                                                                                                                                                       | 3,688,190 |

|    |                                                                                                                                                                                                                      |           |
|----|----------------------------------------------------------------------------------------------------------------------------------------------------------------------------------------------------------------------|-----------|
|    |                                                                                                                                                                                                                      |           |
| 25 | Malaysia OR Johor OR Kedah OR Kelantan OR Kuala Lumpur OR Labuan OR Malacca OR Melaka OR Malaya OR Negeri Sembilan OR Pahang OR Penang OR Perak OR Perlis OR Putrajaya OR Sabah OR Sarawak OR Selangor OR Terengganu | 17,417    |
| 26 | Malaysian                                                                                                                                                                                                            | 3,366     |
| 27 | area* OR Borneo OR city OR cities OR district* OR island* OR isle* OR province* OR region* OR state* OR territor* OR village*                                                                                        | 1,392,874 |
| 28 | 26 AND 27                                                                                                                                                                                                            | 1,138     |
| 29 | 25 OR 28                                                                                                                                                                                                             | 17,513    |
|    |                                                                                                                                                                                                                      |           |
| 30 | 7 AND 24 AND 29                                                                                                                                                                                                      | 429       |
|    |                                                                                                                                                                                                                      |           |
| 31 | Animal migration OR bird migration OR cell* OR membrane* OR molecu*                                                                                                                                                  | 833,650   |
| 32 | 30 NOT 31                                                                                                                                                                                                            | 382       |



#### I.4. Medline

|                            |                               |
|----------------------------|-------------------------------|
| Database name              | Medline                       |
| Database search engine     | OvidSP                        |
| Dates of database coverage | 1946 to September Week 1 2019 |
| Date search conducted      | 17 September 2019             |
| Total number of hits       | 364                           |

| # | Searches                                                                                                                                                                                                                                                                                                                                                                                                                                                                                                                                                                                                                                                                                                                                                                                                                                                                                                                                                                                                                        | Results    |
|---|---------------------------------------------------------------------------------------------------------------------------------------------------------------------------------------------------------------------------------------------------------------------------------------------------------------------------------------------------------------------------------------------------------------------------------------------------------------------------------------------------------------------------------------------------------------------------------------------------------------------------------------------------------------------------------------------------------------------------------------------------------------------------------------------------------------------------------------------------------------------------------------------------------------------------------------------------------------------------------------------------------------------------------|------------|
| 1 | asylum* OR displaced OR emigra* OR emigre* OR foreign born OR foreign labor OR foreign labour OR foreign work* OR foreign-born OR foreign-work* OR foreigner* OR immigra* OR migra* OR people of concern OR person of concern OR persons of concern OR refugee* OR smuggl* OR traffick* OR transient* OR transmigrant*                                                                                                                                                                                                                                                                                                                                                                                                                                                                                                                                                                                                                                                                                                          | 720,051    |
| 2 | “Emigrants and Immigrants” [MeSH]                                                                                                                                                                                                                                                                                                                                                                                                                                                                                                                                                                                                                                                                                                                                                                                                                                                                                                                                                                                               | 11,337     |
| 3 | “Emigration and Immigration” [MeSH]                                                                                                                                                                                                                                                                                                                                                                                                                                                                                                                                                                                                                                                                                                                                                                                                                                                                                                                                                                                             | 24,805     |
| 4 | Human Trafficking [MeSH]                                                                                                                                                                                                                                                                                                                                                                                                                                                                                                                                                                                                                                                                                                                                                                                                                                                                                                                                                                                                        | 347        |
| 5 | Refugees [MeSH]                                                                                                                                                                                                                                                                                                                                                                                                                                                                                                                                                                                                                                                                                                                                                                                                                                                                                                                                                                                                                 | 9,508      |
| 6 | “Transients and Migrants”                                                                                                                                                                                                                                                                                                                                                                                                                                                                                                                                                                                                                                                                                                                                                                                                                                                                                                                                                                                                       | 10,955     |
| 7 | 1 OR 2 OR 3 OR 4 OR 5 OR 6                                                                                                                                                                                                                                                                                                                                                                                                                                                                                                                                                                                                                                                                                                                                                                                                                                                                                                                                                                                                      | 720,051    |
| 8 | abnormalit* OR abortion* OR abscess* OR accident* OR ache* OR aids OR ailment* OR alcohol* OR allerg* OR anorexia OR AMR OR antibiotic resistan* OR antimicrobial resistan* OR anxiet* OR allerg* OR apnoea OR arthritis OR ascariasis OR assault* OR asthma OR attack* OR bacteri* OR bipolar OR bite* OR blastoma* OR bleed* OR blind OR blood OR burn* OR cancer* OR cardio* OR Chagas OR chlamydia OR cholesterol OR coma OR complication* OR condition* OR condom* OR contraception OR cyst* OR dead OR deaf OR death* OR decay OR deform* OR dehydrat* OR dementia OR dengue OR depress* OR diabetes OR diarrhoea OR disabilit* OR disease* OR disorder* OR dracunculiasis OR drug* OR dysfunction* OR eczema OR enlargement* OR epilep* OR exhaust* OR failure OR fatal* OR fatigue OR fever* OR filariasis OR flu OR gall stone* gallstone* OR gonorrhoea OR headache* OR health OR healthcare OR hearing loss OR helminth* OR hepatitis OR hernia* OR herpe* OR HIV OR hookworm* OR HPV OR hypertension OR illness* OR | 21,089,958 |

|    |                                                                                                                                                                                                                                                                                                                                                                                                                                                                                                                                                                                                                                                                                                                                                                                                                                                                                                                                                                                                                                                                                  |           |
|----|----------------------------------------------------------------------------------------------------------------------------------------------------------------------------------------------------------------------------------------------------------------------------------------------------------------------------------------------------------------------------------------------------------------------------------------------------------------------------------------------------------------------------------------------------------------------------------------------------------------------------------------------------------------------------------------------------------------------------------------------------------------------------------------------------------------------------------------------------------------------------------------------------------------------------------------------------------------------------------------------------------------------------------------------------------------------------------|-----------|
|    | indigestion* OR infect* OR inflame* OR injur* OR leishmaniasis OR leprosy OR leukaemia OR leukemia OR lice OR life expectancy OR malaria OR malformat* OR malnutrition OR measles OR medical OR melanoma* OR mental* OR migraine OR miscarriage* OR morbidit* OR mortalit* OR muscl* OR myeloma OR nausea OR neuro* OR nutrition* OR onchocerciasis OR osteoarthritis OR osteoporosis OR pain* OR parasite* OR patient care OR physical activ* OR pneumonia OR poison* OR psoriasis OR psychiatric OR psychos* OR rabies OR rape* OR reproductiv* OR rheuma* OR ringworm* OR sarcoma* OR scabies OR schistosomiasis OR schizophren* OR seizure* OR sepsis* OR sexual* OR shock* OR sick* OR smoking OR sore* OR STD* OR stillbirth* OR stress* OR stroke* OR suicid* OR sunburn* OR syndrome* OR syphilis OR TB OR thrombosis OR tobacco OR STI* OR toothache* OR trachoma OR trauma* OR trichuriasis OR trichomoniasis OR trypanosomiasis OR tuberculosis OR tumor* OR tumour* OR ulcer* OR violence OR virus* OR vomit* OR wart* OR well-being OR wellbeing OR worm* OR wound* |           |
| 9  | Accidents [MeSH]                                                                                                                                                                                                                                                                                                                                                                                                                                                                                                                                                                                                                                                                                                                                                                                                                                                                                                                                                                                                                                                                 | 182,330   |
| 10 | “Delivery of Health Care” [MeSH]                                                                                                                                                                                                                                                                                                                                                                                                                                                                                                                                                                                                                                                                                                                                                                                                                                                                                                                                                                                                                                                 | 1,028,923 |
| 11 | Disease [MeSH]                                                                                                                                                                                                                                                                                                                                                                                                                                                                                                                                                                                                                                                                                                                                                                                                                                                                                                                                                                                                                                                                   | 181,324   |
| 12 | Health [MeSH]                                                                                                                                                                                                                                                                                                                                                                                                                                                                                                                                                                                                                                                                                                                                                                                                                                                                                                                                                                                                                                                                    | 344,725   |
| 13 | Health Behavior [MeSH]                                                                                                                                                                                                                                                                                                                                                                                                                                                                                                                                                                                                                                                                                                                                                                                                                                                                                                                                                                                                                                                           | 301,243   |
| 14 | Health Facilities [MeSH]                                                                                                                                                                                                                                                                                                                                                                                                                                                                                                                                                                                                                                                                                                                                                                                                                                                                                                                                                                                                                                                         | 756,386   |
| 15 | Health Policy [MeSH]                                                                                                                                                                                                                                                                                                                                                                                                                                                                                                                                                                                                                                                                                                                                                                                                                                                                                                                                                                                                                                                             | 102,614   |
| 16 | Health Services [MeSH]                                                                                                                                                                                                                                                                                                                                                                                                                                                                                                                                                                                                                                                                                                                                                                                                                                                                                                                                                                                                                                                           | 2,044,089 |
| 17 | Infection [MeSH]                                                                                                                                                                                                                                                                                                                                                                                                                                                                                                                                                                                                                                                                                                                                                                                                                                                                                                                                                                                                                                                                 | 765,299   |
| 18 | Malnutrition [MeSH]                                                                                                                                                                                                                                                                                                                                                                                                                                                                                                                                                                                                                                                                                                                                                                                                                                                                                                                                                                                                                                                              | 118,335   |
| 19 | Morbidity [MeSH]                                                                                                                                                                                                                                                                                                                                                                                                                                                                                                                                                                                                                                                                                                                                                                                                                                                                                                                                                                                                                                                                 | 524,764   |
| 20 | Mortality [MeSH]                                                                                                                                                                                                                                                                                                                                                                                                                                                                                                                                                                                                                                                                                                                                                                                                                                                                                                                                                                                                                                                                 | 364,390   |
| 21 | Neoplasms [MeSH]                                                                                                                                                                                                                                                                                                                                                                                                                                                                                                                                                                                                                                                                                                                                                                                                                                                                                                                                                                                                                                                                 | 3,212,183 |
| 22 | Parasites [ MeSH]                                                                                                                                                                                                                                                                                                                                                                                                                                                                                                                                                                                                                                                                                                                                                                                                                                                                                                                                                                                                                                                                | 6,776     |
| 23 | Viruses [MeSH]                                                                                                                                                                                                                                                                                                                                                                                                                                                                                                                                                                                                                                                                                                                                                                                                                                                                                                                                                                                                                                                                   | 754,871   |
| 24 | “Wounds and Injuries” [MeSH]                                                                                                                                                                                                                                                                                                                                                                                                                                                                                                                                                                                                                                                                                                                                                                                                                                                                                                                                                                                                                                                     | 873,897   |

|    |                                                                                                                                                                                                                      |            |
|----|----------------------------------------------------------------------------------------------------------------------------------------------------------------------------------------------------------------------|------------|
| 25 | 8 OR 9 OR 10 OR 11 OR 12 OR 13 OR 14 OR 15 OR 16 OR 17 OR 18 OR 19 OR 20 OR 21 OR 22 OR 23 OR 24                                                                                                                     | 21,770,503 |
|    |                                                                                                                                                                                                                      |            |
| 26 | Malaysia OR Johor OR Kedah OR Kelantan OR Kuala Lumpur OR Labuan OR Malacca OR Melaka OR Malaya OR Negeri Sembilan OR Pahang OR Penang OR Perak OR Perlis OR Putrajaya OR Sabah OR Sarawak OR Selangor OR Terengganu | 17,824     |
| 27 | Malaysian                                                                                                                                                                                                            | 4,673      |
| 28 | area* OR Borneo OR city OR cities OR district* OR island* OR isle* OR province* OR region* OR state* OR territor* OR village*                                                                                        | 4,572,673  |
| 29 | 27 AND 28                                                                                                                                                                                                            | 1,297      |
| 30 | 26 OR 29                                                                                                                                                                                                             | 18,038     |
|    |                                                                                                                                                                                                                      |            |
| 31 | 7 AND 25 AND 30                                                                                                                                                                                                      | 404        |
|    |                                                                                                                                                                                                                      |            |
| 32 | Animal migration OR bird migration OR cell* OR membrane* OR molecul*                                                                                                                                                 | 6,952,122  |
| 33 | 31 NOT 32                                                                                                                                                                                                            | 364        |

### I.5. PsychInfo

|                            |                               |
|----------------------------|-------------------------------|
| Database name              | PsychInfo                     |
| Database search engine     | OvidSP                        |
| Dates of database coverage | 1806 to September Week 2 2019 |
| Date search conducted      | 17 September 2019             |
| Total number of hits       | 91                            |

| # | Searches                                                                                                                                                                                                                                                                                                                                                                                                                                                                                                                                                                                                                                                                                                                                                                                                                                                                      | Results   |
|---|-------------------------------------------------------------------------------------------------------------------------------------------------------------------------------------------------------------------------------------------------------------------------------------------------------------------------------------------------------------------------------------------------------------------------------------------------------------------------------------------------------------------------------------------------------------------------------------------------------------------------------------------------------------------------------------------------------------------------------------------------------------------------------------------------------------------------------------------------------------------------------|-----------|
| 1 | asylum* OR displaced OR emigra* OR emigre* OR foreign born OR foreign labor OR foreign labour OR foreign work* OR foreign-born OR foreign-work* OR foreigner* OR immigra* OR migra* OR people of concern OR person of concern OR persons of concern OR refugee* OR smuggl* OR traffick* OR transient* OR transmigrant*                                                                                                                                                                                                                                                                                                                                                                                                                                                                                                                                                        | 112,729   |
| 2 | Asylum seeking [MeSH]                                                                                                                                                                                                                                                                                                                                                                                                                                                                                                                                                                                                                                                                                                                                                                                                                                                         | 487       |
| 3 | Foreign workers [MeSH]                                                                                                                                                                                                                                                                                                                                                                                                                                                                                                                                                                                                                                                                                                                                                                                                                                                        | 530       |
| 4 | Human migration [MeSH]                                                                                                                                                                                                                                                                                                                                                                                                                                                                                                                                                                                                                                                                                                                                                                                                                                                        | 12,788    |
| 5 | Human trafficking [MeSH]                                                                                                                                                                                                                                                                                                                                                                                                                                                                                                                                                                                                                                                                                                                                                                                                                                                      | 844       |
| 6 | Immigration [MeSH]                                                                                                                                                                                                                                                                                                                                                                                                                                                                                                                                                                                                                                                                                                                                                                                                                                                            | 21,250    |
| 7 | Refugees [MeSH]                                                                                                                                                                                                                                                                                                                                                                                                                                                                                                                                                                                                                                                                                                                                                                                                                                                               | 5,580     |
| 8 | 1 OR 2 OR 3 OR 4 OR 5 OR 6 OR 7                                                                                                                                                                                                                                                                                                                                                                                                                                                                                                                                                                                                                                                                                                                                                                                                                                               | 113,572   |
| 9 | abnormalit* OR abortion* OR abscess* OR accident* OR ache* OR aids OR ailment* OR alcohol* OR allerg* OR anorexia OR AMR OR antibiotic resistan* OR antimicrobial resistan* OR anxiet* OR allerg* OR apnoea OR arthritis OR ascariasis OR assault* OR asthma OR attack* OR bacteri* OR bipolar OR bite* OR blastoma* OR bleed* OR blind OR blood OR burn* OR cancer* OR cardio* OR Chagas OR chlamydia OR cholesterol OR coma OR complication* OR condition* OR condom* OR contraception OR cyst* OR dead OR deaf OR death* OR decay OR deform* OR dehydrat* OR dementia OR dengue OR depress* OR diabetes OR diarrhoea OR disabilit* OR disease* OR disorder* OR dracunculiasis OR drug* OR dysfunction* OR eczema OR enlargement* OR epilep* OR exhaust* OR failure OR fatal* OR fatigue OR fever* OR filariasis OR flu OR gall stone* gallstone* OR gonorrhea OR headache* | 3,197,191 |

|    |                                                                                                                                                                                                                                                                                                                                                                                                                                                                                                                                                                                                                                                                                                                                                                                                                                                                                                                                                                                                                                                                                                                                                                                                                                   |         |
|----|-----------------------------------------------------------------------------------------------------------------------------------------------------------------------------------------------------------------------------------------------------------------------------------------------------------------------------------------------------------------------------------------------------------------------------------------------------------------------------------------------------------------------------------------------------------------------------------------------------------------------------------------------------------------------------------------------------------------------------------------------------------------------------------------------------------------------------------------------------------------------------------------------------------------------------------------------------------------------------------------------------------------------------------------------------------------------------------------------------------------------------------------------------------------------------------------------------------------------------------|---------|
|    | OR health OR healthcare OR hearing loss OR helminth* OR hepatitis OR hernia* OR herpe* OR HIV OR hookworm* OR HPV OR hypertension OR illness* OR indigestion* OR infect* OR inflame* OR injur* OR leishmaniasis OR leprosy OR leukaemia OR leukemia OR lice OR life expectancy OR malaria OR malformat* OR malnutrition OR measles OR medical OR melanoma* OR mental* OR migraine OR miscarriage* OR morbidit* OR mortalit* OR muscl* OR myeloma OR nausea OR neuro* OR nutrition* OR onchocerciasis OR osteoarthritis OR osteoporosis OR pain* OR parasite* OR patient care OR physical activ* OR pneumonia OR poison* OR psoriasis OR psychiatric OR psychos* OR rabies OR rape* OR reproductiv* OR rheuma* OR ringworm* OR sarcoma* OR scabies OR schistosomiasis OR schizophren* OR seizure* OR sepsis* OR sexual* OR shock* OR sick* OR smoking OR sore* OR STD* OR stillbirth* OR stress* OR stroke* OR suicid* OR sunburn* OR syndrome* OR syphilis OR TB OR thrombosis OR tobacco OR STI* OR toothache* OR trachoma OR trauma* OR trichuriasis OR trichomoniasis OR trypanosomiasis OR tuberculosis OR tumor* OR tumour* OR ulcer* OR violence OR virus* OR vomit* OR wart* OR well-being OR wellbeing OR worm* OR wound* |         |
| 10 | Accidents [MeSH]                                                                                                                                                                                                                                                                                                                                                                                                                                                                                                                                                                                                                                                                                                                                                                                                                                                                                                                                                                                                                                                                                                                                                                                                                  | 13,047  |
| 11 | Chronic illness [MeSH]                                                                                                                                                                                                                                                                                                                                                                                                                                                                                                                                                                                                                                                                                                                                                                                                                                                                                                                                                                                                                                                                                                                                                                                                            | 27,898  |
| 12 | “Death and Dying” [MeSH]                                                                                                                                                                                                                                                                                                                                                                                                                                                                                                                                                                                                                                                                                                                                                                                                                                                                                                                                                                                                                                                                                                                                                                                                          | 37,732  |
| 13 | Health [MeSH]                                                                                                                                                                                                                                                                                                                                                                                                                                                                                                                                                                                                                                                                                                                                                                                                                                                                                                                                                                                                                                                                                                                                                                                                                     | 239,359 |
| 14 | Health Behavior [MeSH]                                                                                                                                                                                                                                                                                                                                                                                                                                                                                                                                                                                                                                                                                                                                                                                                                                                                                                                                                                                                                                                                                                                                                                                                            | 29,441  |
| 15 | Health Care Delivery [MeSH]                                                                                                                                                                                                                                                                                                                                                                                                                                                                                                                                                                                                                                                                                                                                                                                                                                                                                                                                                                                                                                                                                                                                                                                                       | 93,926  |
| 16 | Health Care Policy [MeSH]                                                                                                                                                                                                                                                                                                                                                                                                                                                                                                                                                                                                                                                                                                                                                                                                                                                                                                                                                                                                                                                                                                                                                                                                         | 11,882  |
| 17 | Health Care Services [MeSH]                                                                                                                                                                                                                                                                                                                                                                                                                                                                                                                                                                                                                                                                                                                                                                                                                                                                                                                                                                                                                                                                                                                                                                                                       | 199,129 |
| 18 | Health Care Utilization [MeSH]                                                                                                                                                                                                                                                                                                                                                                                                                                                                                                                                                                                                                                                                                                                                                                                                                                                                                                                                                                                                                                                                                                                                                                                                    | 15,311  |
| 19 | Infectious disorders [MeSH]                                                                                                                                                                                                                                                                                                                                                                                                                                                                                                                                                                                                                                                                                                                                                                                                                                                                                                                                                                                                                                                                                                                                                                                                       | 60,085  |
| 20 | Injuries [MeSH]                                                                                                                                                                                                                                                                                                                                                                                                                                                                                                                                                                                                                                                                                                                                                                                                                                                                                                                                                                                                                                                                                                                                                                                                                   | 25,738  |
| 21 | Morbidity [MeSH]                                                                                                                                                                                                                                                                                                                                                                                                                                                                                                                                                                                                                                                                                                                                                                                                                                                                                                                                                                                                                                                                                                                                                                                                                  | 7,010   |
| 22 | Neoplasms [MeSH]                                                                                                                                                                                                                                                                                                                                                                                                                                                                                                                                                                                                                                                                                                                                                                                                                                                                                                                                                                                                                                                                                                                                                                                                                  | 49,460  |
| 23 | Nutritional deficiencies [MeSH]                                                                                                                                                                                                                                                                                                                                                                                                                                                                                                                                                                                                                                                                                                                                                                                                                                                                                                                                                                                                                                                                                                                                                                                                   | 3,952   |
| 24 | Parasitic disorders [MeSH]                                                                                                                                                                                                                                                                                                                                                                                                                                                                                                                                                                                                                                                                                                                                                                                                                                                                                                                                                                                                                                                                                                                                                                                                        | 1,068   |
| 25 | Viral disorders [MeSH]                                                                                                                                                                                                                                                                                                                                                                                                                                                                                                                                                                                                                                                                                                                                                                                                                                                                                                                                                                                                                                                                                                                                                                                                            | 50,123  |

|    |                                                                                                                                                                                                                            |           |
|----|----------------------------------------------------------------------------------------------------------------------------------------------------------------------------------------------------------------------------|-----------|
| 26 | 9 OR 10 OR 11 OR 12 OR 13 OR 14 OR 15 OR 16 OR 17 OR 18 OR 19 OR 20 OR 21<br>OR 22 OR 23 OR 24 OR 25                                                                                                                       | 3,211,923 |
|    |                                                                                                                                                                                                                            |           |
| 27 | Malaysia OR Johor OR Kedah OR Kelantan OR Kuala Lumpur OR Labuan OR<br>Malacca OR Melaka OR Malaya OR Negeri Sembilan OR Pahang OR Penang OR Perak<br>OR Perlis OR Putrajaya OR Sabah OR Sarawak OR Selangor OR Terengganu | 3,636     |
| 28 | Malaysian                                                                                                                                                                                                                  | 1,676     |
| 29 | area* OR Borneo OR city OR cities OR district* OR island* OR isle* OR province*<br>OR region* OR state* OR territor* OR village*                                                                                           | 1,025,257 |
| 30 | 28 AND 29                                                                                                                                                                                                                  | 391       |
| 31 | 27 OR 30                                                                                                                                                                                                                   | 3,727     |
|    |                                                                                                                                                                                                                            |           |
| 32 | 8 AND 26 AND 31                                                                                                                                                                                                            | 91        |
|    |                                                                                                                                                                                                                            |           |
| 33 | Animal migration OR bird migration OR cell* OR membrane* OR molecul*                                                                                                                                                       | 184,060   |
| 34 | 32 NOT 33                                                                                                                                                                                                                  | 91        |

## I.6. Social Policy and Practice

|                            |                            |
|----------------------------|----------------------------|
| Database name              | Social Policy and Practice |
| Database search engine     | OvidSP                     |
| Dates of database coverage | N/A                        |
| Date search conducted      | 17 September 2019          |
| Total number of hits       | 5                          |

| # | Searches                                                                                                                                                                                                                                                                                                                                                                                                                                                                                                                                                                                                                                                                                                                                                                                                                                                                                                                                                                                                                                                                                                                                                                                                                                                                                                                                                                                                                                                                                                                                                                                                                                                                                                                         | Results |
|---|----------------------------------------------------------------------------------------------------------------------------------------------------------------------------------------------------------------------------------------------------------------------------------------------------------------------------------------------------------------------------------------------------------------------------------------------------------------------------------------------------------------------------------------------------------------------------------------------------------------------------------------------------------------------------------------------------------------------------------------------------------------------------------------------------------------------------------------------------------------------------------------------------------------------------------------------------------------------------------------------------------------------------------------------------------------------------------------------------------------------------------------------------------------------------------------------------------------------------------------------------------------------------------------------------------------------------------------------------------------------------------------------------------------------------------------------------------------------------------------------------------------------------------------------------------------------------------------------------------------------------------------------------------------------------------------------------------------------------------|---------|
| 1 | asylum* OR displaced OR emigra* OR emigre* OR foreign born OR foreign labor OR foreign labour OR foreign work* OR foreign-born OR foreign-work* OR foreigner* OR immigra* OR migra* OR people of concern OR person of concern OR persons of concern OR refugee* OR smuggl* OR traffick* OR transient* OR transmigrant*                                                                                                                                                                                                                                                                                                                                                                                                                                                                                                                                                                                                                                                                                                                                                                                                                                                                                                                                                                                                                                                                                                                                                                                                                                                                                                                                                                                                           | 10,050  |
| 2 | abnormalit* OR abortion* OR abscess* OR accident* OR ache* OR aids OR ailment* OR alcohol* OR allerg* OR anorexia OR AMR OR antibiotic resistan* OR antimicrobial resistan* OR anxiet* OR allerg* OR apnoea OR arthritis OR ascariasis OR assault* OR asthma OR attack* OR bacteri* OR bipolar OR bite* OR blastoma* OR bleed* OR blind OR blood OR burn* OR cancer* OR cardio* OR Chagas OR chlamydia OR cholesterol OR coma OR complication* OR condition* OR condom* OR contraception OR cyst* OR dead OR deaf OR death* OR decay OR deform* OR dehydrat* OR dementia OR dengue OR depress* OR diabetes OR diarrhoea OR disabilit* OR disease* OR disorder* OR dracunculiasis OR drug* OR dysfunction* OR eczema OR enlargement* OR epilep* OR exhaust* OR failure OR fatal* OR fatigue OR fever* OR filariasis OR flu OR gall stone* gallstone* OR gonorrhoea OR headache* OR health OR healthcare OR hearing loss OR helminth* OR hepatitis OR hernia* OR herpe* OR HIV OR hookworm* OR HPV OR hypertension OR illness* OR indigestion* OR infect* OR inflame* OR injur* OR leishmaniasis OR leprosy OR leukaemia OR leukemia OR lice OR life expectancy OR malaria OR malformat* malnutrition OR measles OR medical OR melanoma* OR mental* OR migraine OR miscarriage* OR morbidit* OR mortalit* OR muscl* OR myeloma OR nausea OR neuro* OR nutrition* OR onchocerciasis OR osteoarthritis OR osteoporosis OR pain* OR parasite* OR patient care OR physical activ* OR pneumonia OR poison* OR psoriasis OR psychiatric OR psychos* OR rabies OR rape* OR reproductiv* OR rheuma* OR ringworm* OR sarcoma* OR scabies OR schistosomiasis OR schizophren* OR seizure* OR sepsis* OR sexual* OR shock* OR sick* OR smoking | 197,274 |

|    |                                                                                                                                                                                                                                                                                                                                                                              |        |
|----|------------------------------------------------------------------------------------------------------------------------------------------------------------------------------------------------------------------------------------------------------------------------------------------------------------------------------------------------------------------------------|--------|
|    | OR sore* OR STD* OR stillbirth* OR stress* OR stroke* OR suicid* OR sunburn* OR syndrome* OR syphilis OR TB OR thrombosis OR tobacco OR STI* OR toothache* OR trachoma OR trauma* OR trichuriasis OR trichomoniasis OR trypanosomiasis OR tuberculosis OR tumor* OR tumour* OR ulcer* OR violence OR virus* OR vomit* OR wart* OR well-being OR wellbeing OR worm* OR wound* |        |
|    |                                                                                                                                                                                                                                                                                                                                                                              |        |
| 3  | Malaysia OR Johor OR Kedah OR Kelantan OR Kuala Lumpur OR Labuan OR Malacca OR Melaka OR Malaya OR Negeri Sembilan OR Pahang OR Penang OR Perak OR Perlis OR Putrajaya OR Sabah OR Sarawak OR Selangor OR Terengganu                                                                                                                                                         | 113    |
| 4  | Malaysian                                                                                                                                                                                                                                                                                                                                                                    | 21     |
| 5  | area* OR Borneo OR city OR cities OR district* OR island* OR isle* OR province* OR region* OR state* OR territor* OR village*                                                                                                                                                                                                                                                | 92,897 |
| 6  | 4 AND 5                                                                                                                                                                                                                                                                                                                                                                      | 5      |
| 7  | 3 OR 6                                                                                                                                                                                                                                                                                                                                                                       | 114    |
|    |                                                                                                                                                                                                                                                                                                                                                                              |        |
| 8  | 1 AND 2 AND 7                                                                                                                                                                                                                                                                                                                                                                | 5      |
|    |                                                                                                                                                                                                                                                                                                                                                                              |        |
| 9  | Animal migration OR bird migration OR cell* OR membrane* OR molecul*                                                                                                                                                                                                                                                                                                         | 447    |
| 10 | 8 NOT 9                                                                                                                                                                                                                                                                                                                                                                      | 5      |



**I.7. Summary of the identified records**

| <b>Database</b>          | <b>Hits</b>  |
|--------------------------|--------------|
| Econlit                  | 348          |
| Embase                   | 549          |
| Global Health            | 382          |
| Medline                  | 364          |
| PsycInfo                 | 91           |
| Social Policy & Practice | 5            |
| <b>Total</b>             | <b>1,739</b> |
