# Supplementary material for: Developing an evidence assessment framework and appraising the academic literature on migrant health in Malaysia: a scoping review
Source: PubMed Central journal article supplement — BMJ Open. 2021 Jan 18;11(1):e041379. doi: 10.1136/bmjopen-2020-041379 (PMC7813391; doi:10.1136/bmjopen-2020-041379), 2021-01-18
Supplement: bmjopen-2020-041379supp003.pdf [file bmjopen-2020-041379supp003.pdf]

## Supplementary file 3. Individual scores of the quality assessment

| No. | Reference                       | Study design               | Level of evidence | Answer to the quality appraisal question |   |     |   |   |     |     |   |     |    |    |    |    | Total score | Score in percentage | Quality of the study |
|-----|---------------------------------|----------------------------|-------------------|------------------------------------------|---|-----|---|---|-----|-----|---|-----|----|----|----|----|-------------|---------------------|----------------------|
|     |                                 |                            |                   | 1                                        | 2 | 3   | 4 | 5 | 6   | 7   | 8 | 9   | 10 | 11 | 12 | 13 |             |                     |                      |
| 1   | Scheutz et al <sup>33</sup>     | Prevalence                 | Des-3             | V                                        | X | X   | V | V | V   | V   | X | X   | -  | -  | -  | -  | 5/9         | 55.6                | Moderate             |
| 2   | Levy <sup>34</sup>              | Prevalence                 | Des-2             | X                                        | X | V   | X | V | V   | X   | X | V   | -  | -  | -  | -  | 4/9         | 44.4                | Low                  |
| 3   | Kassim et al <sup>35</sup>      | Case series                | Des-3             | X                                        | V | X   | V | X | V   | V   | X | V   | V  | -  | -  | -  | 6/10        | 60.0                | Moderate             |
| 4   | Zulkifli et al <sup>36</sup>    | Analytical cross-sectional | Obs-4             | X                                        | X | N/A | V | V | X   | X   | - | -   | -  | -  | -  | -  | 2/6         | 33.3                | Low                  |
| 5   | Rajeswari et al <sup>37</sup>   | Prevalence                 | Des-3             | X                                        | X | X   | V | X | V   | X   | X | X   | -  | -  | -  | -  | 2/9         | 22.2                | Low                  |
| 6   | Jeyakumar <sup>38</sup>         | Case series                | Des-3             | X                                        | X | X   | V | X | X   | X   | V | V   | V  | -  | -  | -  | 4/10        | 40.0                | Low                  |
| 7   | Jamaiah et al <sup>39</sup>     | Case series                | Des-3             | X                                        | X | X   | V | V | X   | X   | X | V   | V  | -  | -  | -  | 4/10        | 40.0                | Low                  |
| 8   | Krahl & Hashim <sup>40</sup>    | Prevalence                 | Des-3             | V                                        | V | V   | X | V | V   | V   | V | X   | -  | -  | -  | -  | 7/9         | 77.8                | High                 |
| 9   | Zabedah et al <sup>41</sup>     | Prevalence                 | Des-2             | X                                        | X | X   | X | V | V   | X   | X | X   | -  | -  | -  | -  | 2/9         | 22.2                | Low                  |
| 10  | Dony et al <sup>42</sup>        | Prevalence                 | Des-3             | V                                        | V | V   | X | V | X   | X   | V | N/A | -  | -  | -  | -  | 5/8         | 62.5                | Moderate             |
| 11  | Chandran et al <sup>43</sup>    | Case report                | Des-4             | V                                        | X | V   | V | V | N/A | N/A | V | -   | -  | -  | -  | -  | 5/6         | 83.3                | High                 |
| 12  | Nissapatorn et al <sup>44</sup> | Prevalence                 | Des-3             | X                                        | X | V   | X | V | V   | X   | V | N/A | -  | -  | -  | -  | 4/8         | 50.0                | Low                  |
| 13  | Sobri et al <sup>45</sup>       | Case series                | Des-3             | X                                        | V | V   | V | V | X   | X   | X | V   | X  | -  | -  | -  | 5/10        | 50.0                | Low                  |
| 14  | Leong <sup>46</sup>             | Prevalence                 | Des-3             | V                                        | X | X   | X | X | V   | V   | V | X   | -  | -  | -  | -  | 4/9         | 44.4                | Low                  |
| 15  | Sasidharan et al <sup>47</sup>  | Prevalence                 | Des-2             | V                                        | V | V   | X | V | V   | V   | V | X   | -  | -  | -  | -  | 7/9         | 77.8                | High                 |

|    |                                       |                            |        |   |   |     |   |     |     |     |     |   |   |   |   |   |      |      |          |
|----|---------------------------------------|----------------------------|--------|---|---|-----|---|-----|-----|-----|-----|---|---|---|---|---|------|------|----------|
| 16 | Masitah et al <sup>48</sup>           | Case series                | Des-3  | V | X | X   | X | X   | X   | V   | X   | X | X | - | - | - | 2/9  | 22.2 | Low      |
| 17 | Shailendra & Prepageran <sup>49</sup> | Case report                | Des-4  | V | X | V   | V | V   | V   | X   | V   | - | - | - | - | - | 6/8  | 75.0 | High     |
| 18 | Chan et al <sup>50</sup>              | Analytical cross-sectional | Obs-4  | X | X | N/A | X | X   | X   | X   | -   | - | - | - | - | - | 0/6  | 0.0  | Low      |
| 19 | Farhana et al <sup>51</sup>           | Case series                | Des-3  | X | X | X   | V | V   | V   | V   | X   | V | V | - | - | - | 6/10 | 60.0 | Low      |
| 20 | Chan et al <sup>52</sup>              | Analytical cross-sectional | Obs-4  | X | X | N/A | X | X   | X   | X   | -   | - | - | - | - | - | 0/6  | 0.0  | Low      |
| 21 | Murty <sup>53</sup>                   | Case report                | Des-4  | V | V | V   | V | N/A | N/A | N/A | X   | - | - | - | - | - | 4/5  | 80.0 | High     |
| 22 | Murty et al <sup>54</sup>             | Case series                | Des-3  | X | X | X   | V | X   | X   | V   | N/A | V | V | - | - | - | 4/9  | 44.4 | Low      |
| 23 | Mustafa et al <sup>55</sup>           | Prevalence                 | Des-2  | V | X | X   | X | X   | V   | V   | V   | X | - | - | - | - | 4/9  | 44.4 | Low      |
| 24 | Su et al <sup>56</sup>                | Analytical cross-sectional | Obs-4  | V | X | V   | X | X   | V   | V   | -   | - | - | - | - | - | 4/7  | 57.1 | Moderate |
| 25 | Daher et al <sup>57</sup>             | Prevalence                 | Des-2  | V | V | X   | V | X   | V   | N/A | V   | V | - | - | - | - | 6/8  | 75.0 | High     |
| 26 | Ratnasingam et al <sup>58</sup>       | Prevalence                 | Des-2  | X | X | X   | X | X   | X   | X   | V   | X | - | - | - | - | 1/9  | 11.1 | Low      |
| 27 | Ab Rahman & Abdullah <sup>59</sup>    | Case report                | Des-4  | V | V | V   | V | V   | V   | X   | V   | - | - | - | - | - | 7/8  | 87.5 | High     |
| 28 | Taib & Baba <sup>60</sup>             | Case series                | Des-3  | X | X | X   | V | X   | X   | V   | X   | V | X | - | - | - | 3/10 | 30.0 | Low      |
| 29 | Osman et al <sup>61</sup>             | Prevalence                 | Des-3  | X | X | X   | V | X   | V   | N/A | V   | V | - | - | - | - | 4/8  | 50.0 | Low      |
| 30 | Minhat et al <sup>62</sup>            | Prevalence                 | Des-2  | X | X | X   | X | X   | V   | N/A | X   | V | - | - | - | - | 2/8  | 25.0 | Low      |
| 31 | Mendelsohn et al <sup>63</sup>        | Qualitative                | Qual-2 | V | V | V   | V | V   | X   | V   | V   | V | V | - | - | - | 9/10 | 90.0 | High     |
| 32 | Mendelsohn et al <sup>64</sup>        | Analytical cross-sectional | Obs-4  | V | V | N/A | V | V   | X   | V   | -   | - | - | - | - | - | 5/6  | 83.3 | High     |

|    |                                 |                            |       |   |   |     |   |   |   |   |   |     |   |   |   |   |      |      |          |
|----|---------------------------------|----------------------------|-------|---|---|-----|---|---|---|---|---|-----|---|---|---|---|------|------|----------|
| 33 | Kwan et al <sup>65</sup>        | Case series                | Des-3 | X | V | X   | V | X | X | V | X | X   | V | - | - | - | 4/10 | 40.0 | Low      |
| 34 | Santos et al <sup>66</sup>      | Prevalence                 | Des-3 | X | X | X   | X | V | V | V | V | V   | - | - | - | - | 5/9  | 55.6 | Moderate |
| 35 | Razali et al <sup>67</sup>      | Case series                | Des-3 | V | V | V   | V | X | V | V | X | V   | V | - | - | - | 8/10 | 80.0 | High     |
| 36 | Elmi et al <sup>68</sup>        | Case control               | Obs-3 | X | V | V   | X | V | X | V | X | X   | V | - | - | - | 5/10 | 50.0 | Low      |
| 37 | Santos et al <sup>69</sup>      | Prevalence                 | Des-2 | X | X | X   | X | V | V | V | X | V   | - | - | - | - | 4/9  | 44.4 | Low      |
| 38 | William et al <sup>70</sup>     | Prevalence                 | Des-2 | V | V | V   | X | V | V | V | V | X   | - | - | - | - | 7/9  | 77.8 | High     |
| 39 | Siah et al <sup>71</sup>        | Prevalence                 | Des-2 | X | X | X   | X | X | V | X | X | X   | - | - | - | - | 1/9  | 11.1 | Low      |
| 40 | Guinto et al <sup>72</sup>      | Scoping review             | -     | - | - | -   | - | - | - | - | - | -   | - | - | - | - | -    | -    | -        |
| 41 | Vijjian et al <sup>73</sup>     | Analytical cross-sectional | Obs-4 | V | X | N/A | X | X | X | X | - | -   | - | - | - | - | 1/6  | 16.7 | Low      |
| 42 | Azian et al <sup>74</sup>       | Prevalence                 | Des-2 | X | X | X   | X | X | V | X | X | X   | - | - | - | - | 1/9  | 11.1 | Low      |
| 43 | Sahimin et al <sup>75</sup>     | Prevalence                 | Des-2 | X | X | X   | X | X | V | V | V | X   | - | - | - | - | 3/9  | 33.3 | Low      |
| 44 | Noh et al <sup>76</sup>         | Prevalence                 | Des-2 | X | X | X   | X | X | V | X | V | X   | - | - | - | - | 2/9  | 22.2 | Low      |
| 45 | Kamaludin & How <sup>77</sup>   | Analytical cross-sectional | Obs-4 | V | X | N/A | X | X | V | V | - | -   | - | - | - | - | 3/6  | 50.0 | Low      |
| 46 | Min et al <sup>78</sup>         | Prevalence                 | Des-3 | V | V | V   | X | V | X | X | V | N/A | - | - | - | - | 5/8  | 62.5 | Moderate |
| 47 | Woh et al <sup>79</sup>         | Prevalence                 | Des-3 | X | X | X   | V | V | V | X | V | X   | - | - | - | - | 4/9  | 44.4 | Low      |
| 48 | Tanabe et al <sup>80</sup>      | Mixed method               | -     | - | - | -   | - | - | - | - | - | -   | - | - | - | - | -    | -    | -        |
| 49 | Ratnalingam et al <sup>81</sup> | Prevalence                 | Des-2 | V | X | X   | X | V | V | X | X | X   | - | - | - | - | 3/9  | 33.3 | Low      |

|    |                                |                             |        |   |   |   |   |   |   |   |   |   |   |   |   |   |      |      |          |
|----|--------------------------------|-----------------------------|--------|---|---|---|---|---|---|---|---|---|---|---|---|---|------|------|----------|
| 50 | Woh et al <sup>82</sup>        | Prevalence                  | Des-2  | X | X | X | X | X | V | X | V | X | - | - | - | - | 2/9  | 22.2 | Low      |
| 51 | Noor & Shaker <sup>83</sup>    | Analytical cross-sectional  | Obs-4  | V | X | V | V | V | V | V | - | - | - | - | - | - | 6/7  | 85.7 | High     |
| 52 | Noordin et al <sup>84</sup>    | Prevalence                  | Des-3  | X | X | X | X | V | V | X | V | X | - | - | - | - | 3/9  | 33.3 | Low      |
| 53 | Sahimin et al <sup>85</sup>    | Prevalence                  | Des-2  | X | X | X | V | X | V | V | V | X | - | - | - | - | 4/9  | 44.4 | Low      |
| 54 | Labao et al <sup>86</sup>      | Prevalence                  | Des-3  | X | X | X | X | V | V | V | V | V | - | - | - | - | 5/9  | 55.6 | Moderate |
| 55 | Shaw et al <sup>87</sup>       | Randomised controlled trial | Exp-2  | X | X | X | X | X | X | X | X | V | V | V | V | X | 4/13 | 30.8 | Low      |
| 56 | Rahman et al <sup>88</sup>     | Case control                | Obs-3  | X | V | V | X | V | X | V | X | V | V | - | - | - | 6/10 | 60.0 | Moderate |
| 57 | Sahimin et al <sup>89</sup>    | Prevalence                  | Des-2  | X | X | X | V | X | V | V | V | X | - | - | - | - | 4/9  | 44.4 | Low      |
| 58 | Nwabichie et al <sup>90</sup>  | Prevalence                  | Des-2  | V | V | X | X | V | V | V | V | V | - | - | - | - | 7/9  | 77.8 | High     |
| 59 | Jeffree et al <sup>91</sup>    | Case control                | Obs-3  | X | V | V | X | V | X | X | V | V | V | - | - | - | 6/10 | 60.0 | Moderate |
| 60 | Zerguine et al <sup>92</sup>   | Analytical cross-sectional  | Obs-4  | X | V | V | X | X | V | V | - | - | - | - | - | - | 4/7  | 57.1 | Moderate |
| 61 | Ya'acob et al <sup>93</sup>    | Randomised controlled Trial | Exp-2  | X | X | V | X | X | X | V | X | X | V | V | V | X | 5/13 | 38.5 | Low      |
| 62 | Chuah et al <sup>9</sup>       | Qualitative                 | Qual-2 | V | V | V | V | V | X | V | X | V | V | - | - | - | 8/10 | 80.0 | High     |
| 63 | Loganathan et al <sup>94</sup> | Qualitative                 | Qual-2 | X | V | V | V | V | X | V | V | V | V | - | - | - | 8/10 | 80.0 | High     |
| 64 | Rahman et al <sup>95</sup>     | Prevalence                  | Des-3  | X | X | X | X | V | X | X | V | V | - | - | - | - | 3/9  | 33.3 | Low      |
| 65 | Siah et al <sup>96</sup>       | Qualitative                 | Qual-3 | X | V | X | V | V | X | X | X | V | V | - | - | - | 5/10 | 50.0 | Low      |
| 66 | Sahimin et al <sup>97</sup>    | Prevalence                  | Des-2  | X | X | X | V | X | V | X | V | X | - | - | - | - | 3/9  | 33.3 | Low      |

|    |                           |             |        |   |   |   |   |   |   |   |   |   |   |   |   |   |      |      |      |
|----|---------------------------|-------------|--------|---|---|---|---|---|---|---|---|---|---|---|---|---|------|------|------|
| 67 | Chuah et al <sup>98</sup> | Qualitative | Qual-2 | V | V | V | V | V | X | V | X | V | V | - | - | - | 8/10 | 80.0 | High |
|----|---------------------------|-------------|--------|---|---|---|---|---|---|---|---|---|---|---|---|---|------|------|------|
